# Supplementary material for: SOX7 Target Genes and Their Contribution to Its Tumor Suppressive Function
Source: Int J Mol Sci. 2018 May 14;19(5):1451. doi: 10.3390/ijms19051451 (PMC5983648; doi:10.3390/ijms19051451)

**Supplementary Figure 1.** Signaling pathways affected by SOX7 induction in MDA-MB-231 cells.

The Affymetrix Human Genome U219 Array strips were used to analyze RNA samples from MDA-MB-231 cells with DOX-induced SOX7 expression. The microarray data were analyzed by the Kyoto Encyclopedia of Genes and Genomes (i.e. KEGG database). The affected pathways are listed below and schematically presented in the following pages. The regulatory genes with **POSITIVE** fold changes are highlighted in **PINK** and genes with **NEGATIVE** fold changes are in **GREEN**.

List of affected signaling pathways:

1. Apoptosis Pathways
2. p53 Signaling Pathway
3. ERBB Signaling Pathway
4. mTOR Signaling Pathways
5. TGF- $\beta$  Signaling Pathways
6. Toll-Like Receptor Signaling Pathway
7. JAK-STAT Signaling Pathway
8. Insulin Signaling Pathway
9. MAP Signaling Pathway
10. Chemokine Signaling Pathway
11. Pathways in Cancer
12. Pancreatic Cancer
13. Glioma
14. Bladder Cancer
15. Small Cell Lung Cancer
16. Chronic Myeloid Leukemia
17. Endocytosis
18. Osteoclast Differentiation
19. Focal Adhesion
20. ECM-Receptor Interaction
21. Cell Adhesion Molecules
22. Complement and Coagulation Cascades
23. NOD-Like Receptor Signaling Pathway
24. Hematopoietic Cell Lineage
25. Fc $\gamma$ R-Mediated Phagocytosis
26. Type I Diabetes Mellitus
27. Bacterial Invasion of Epithelial Cells
28. Malaria
29. Amoebiasis
30. Measles
31. Influenza A
32. Rheumatoid Arthritis

# Apoptosis Pathways

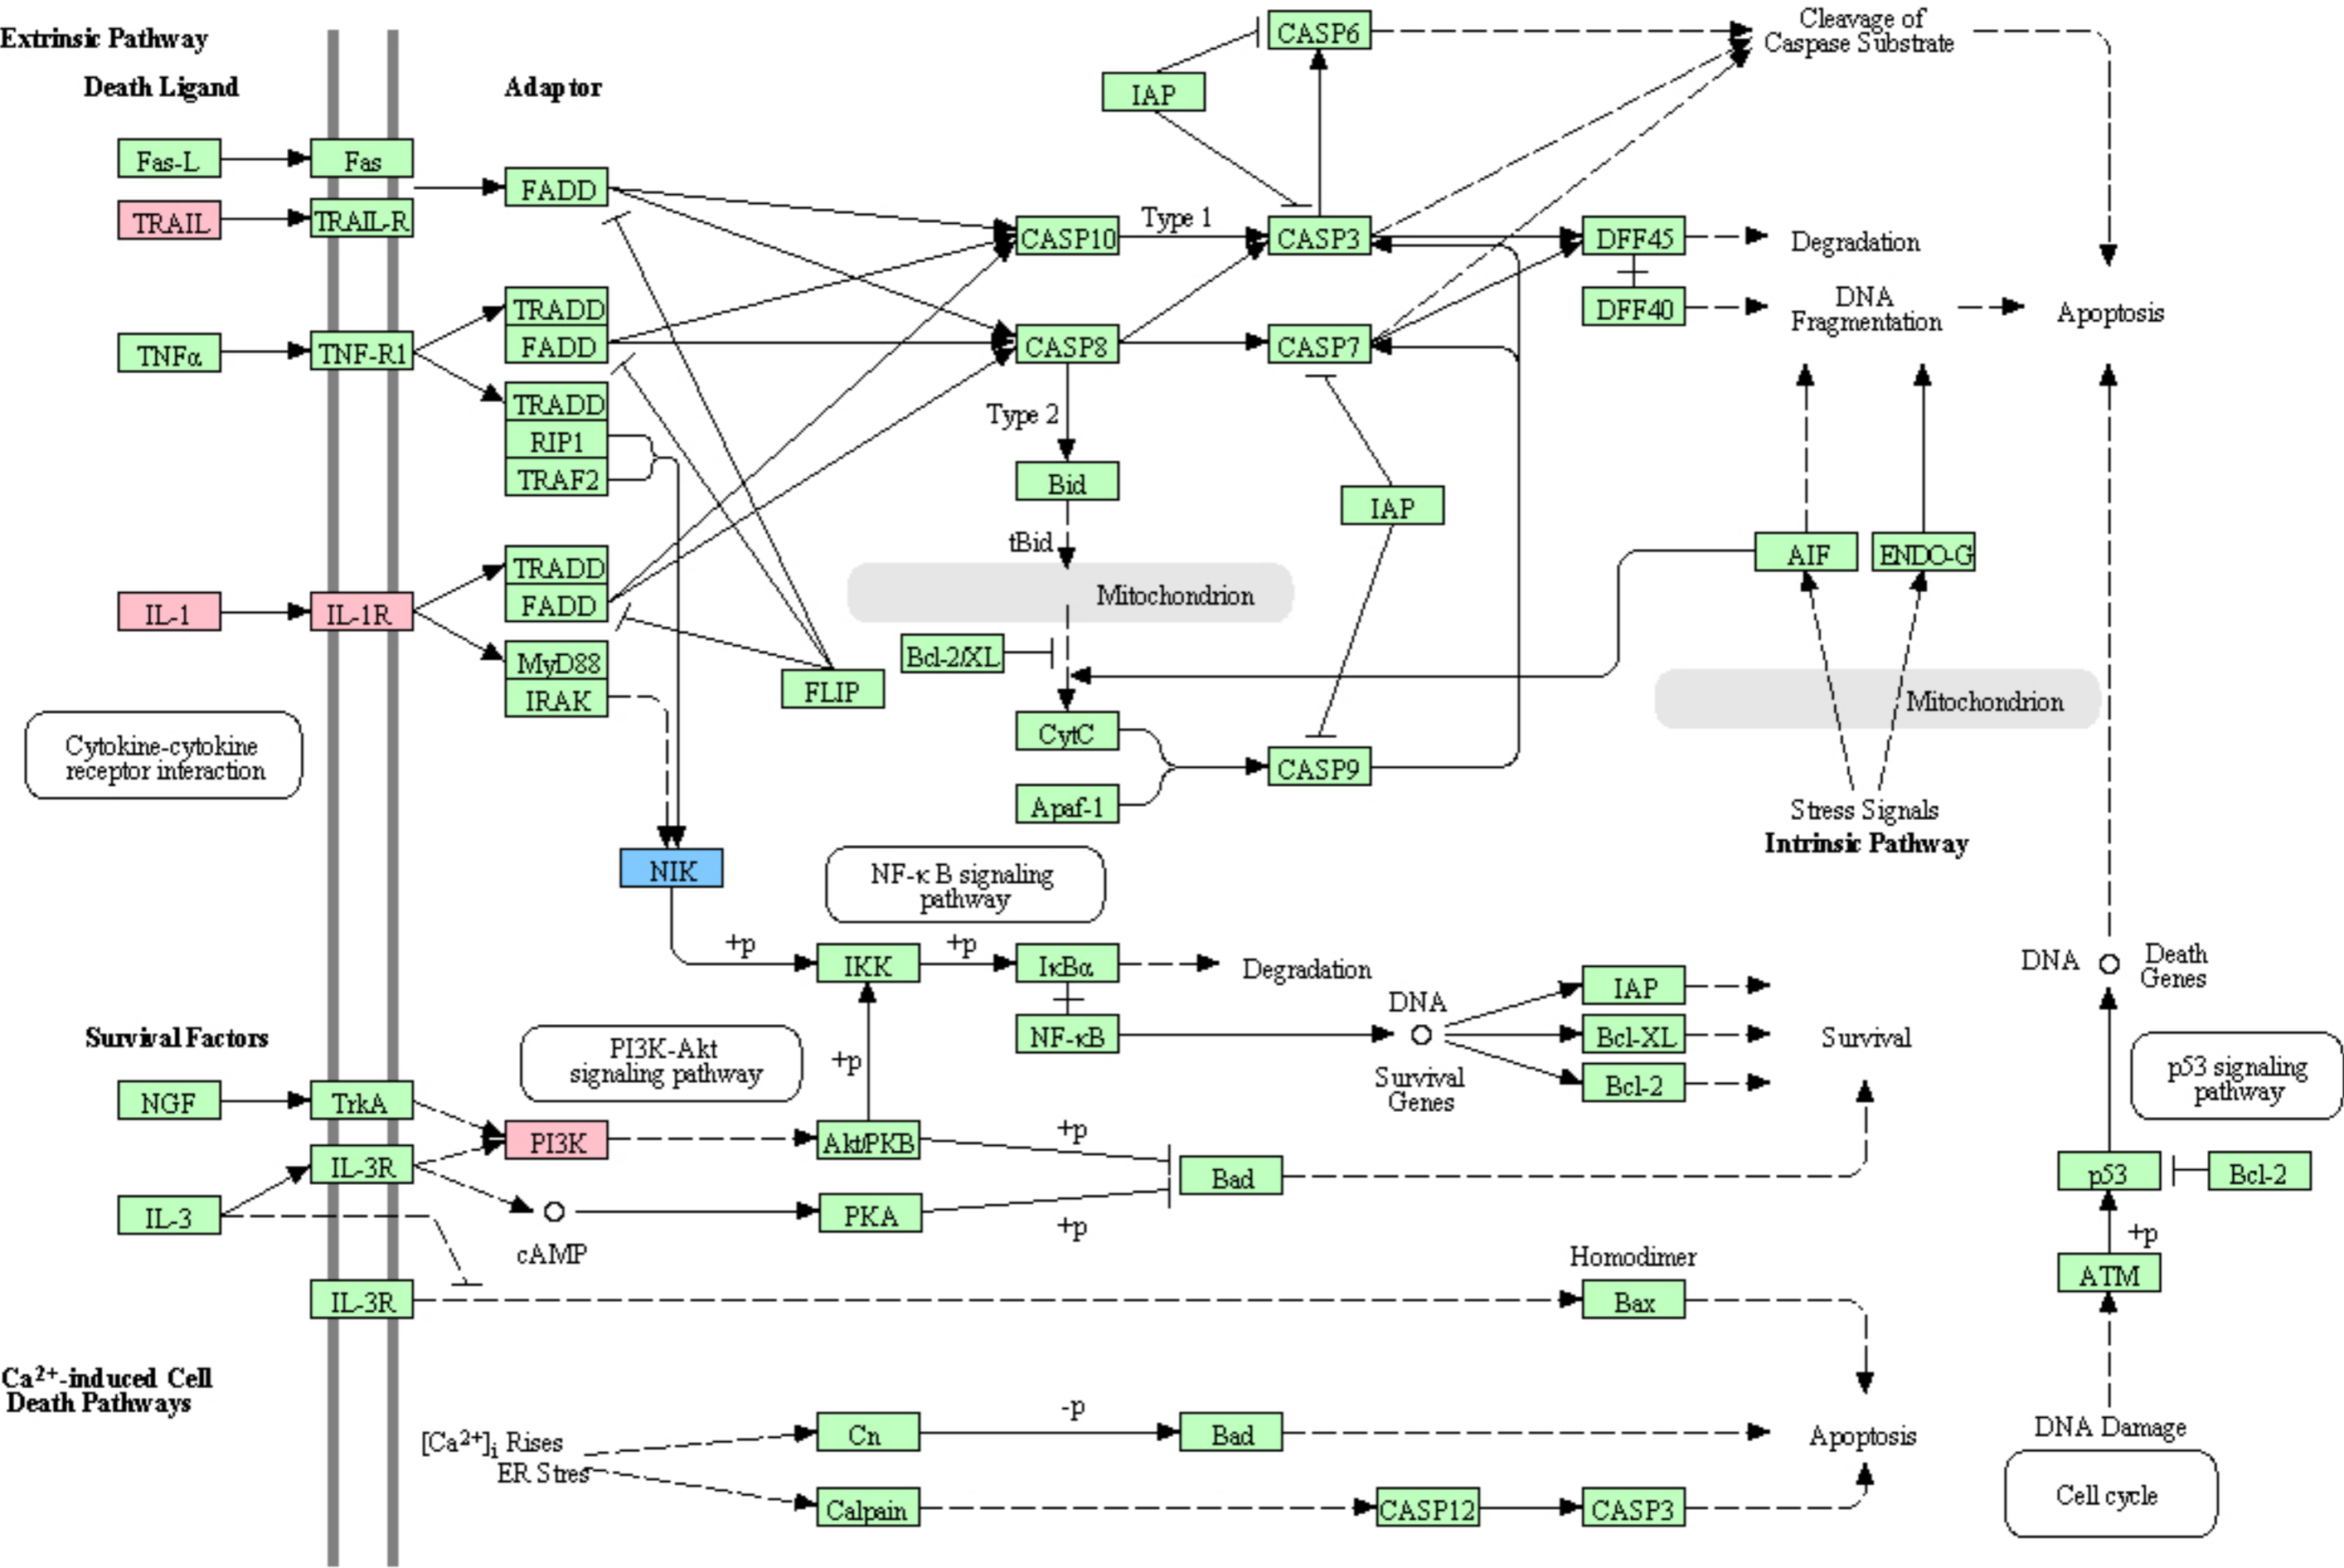

# p53 Signaling Pathway

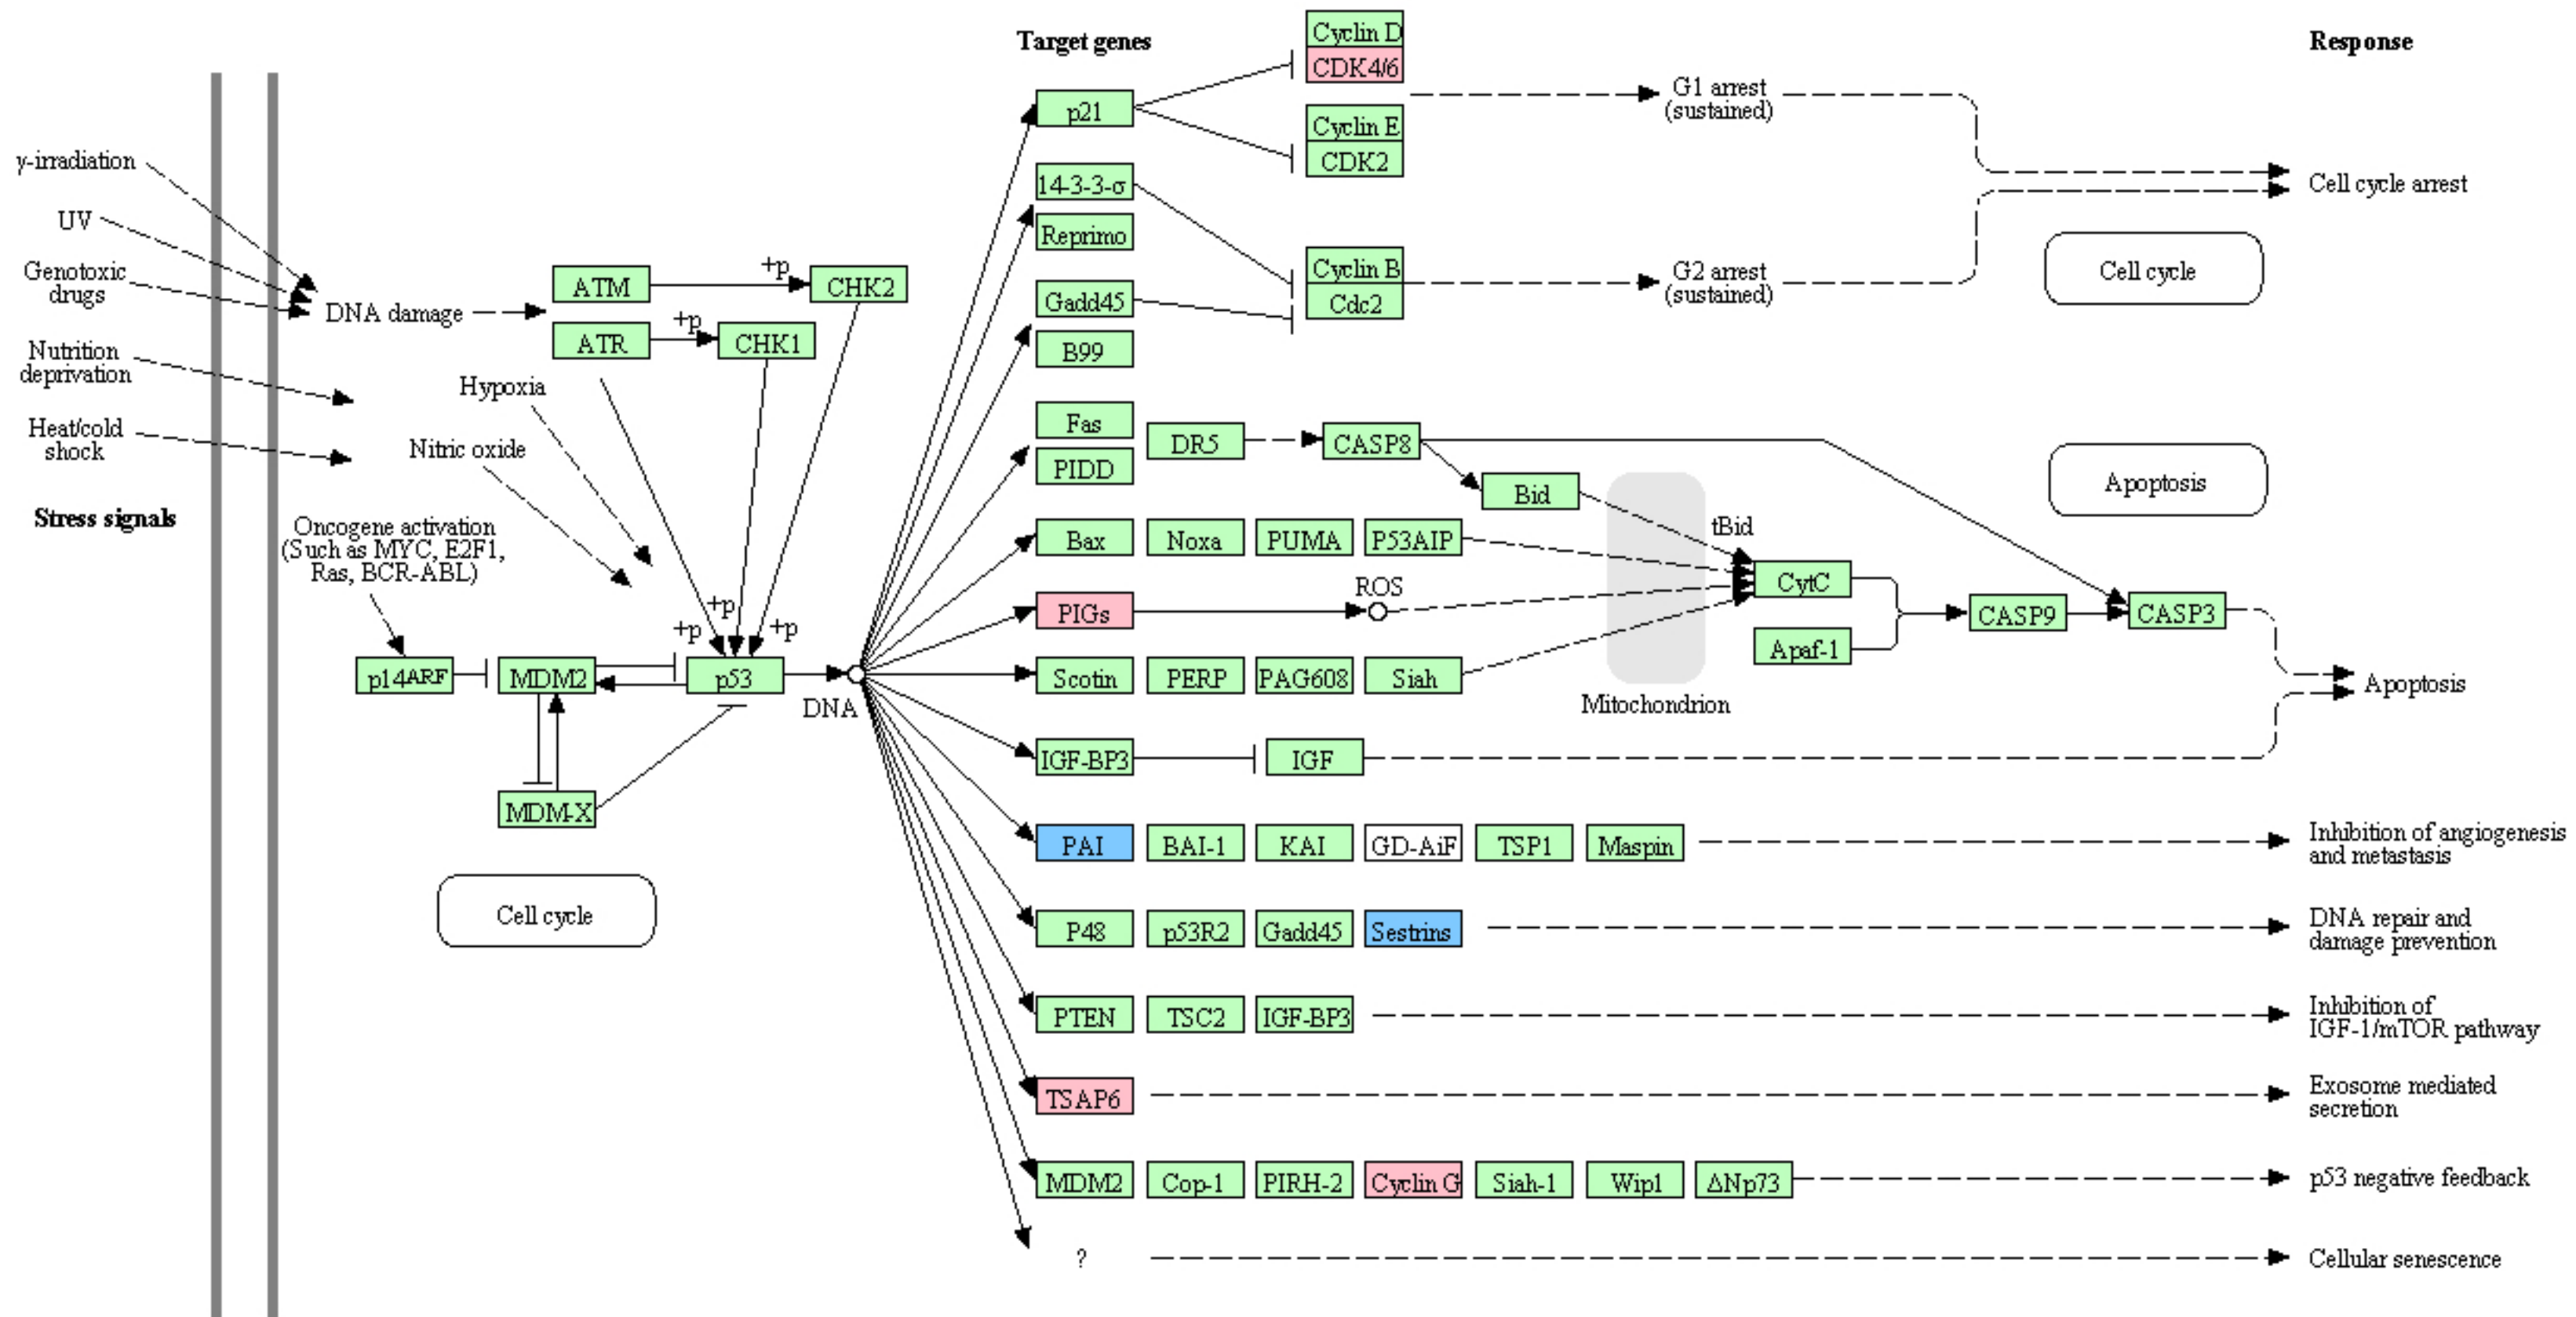

# ERBB Signaling Pathway

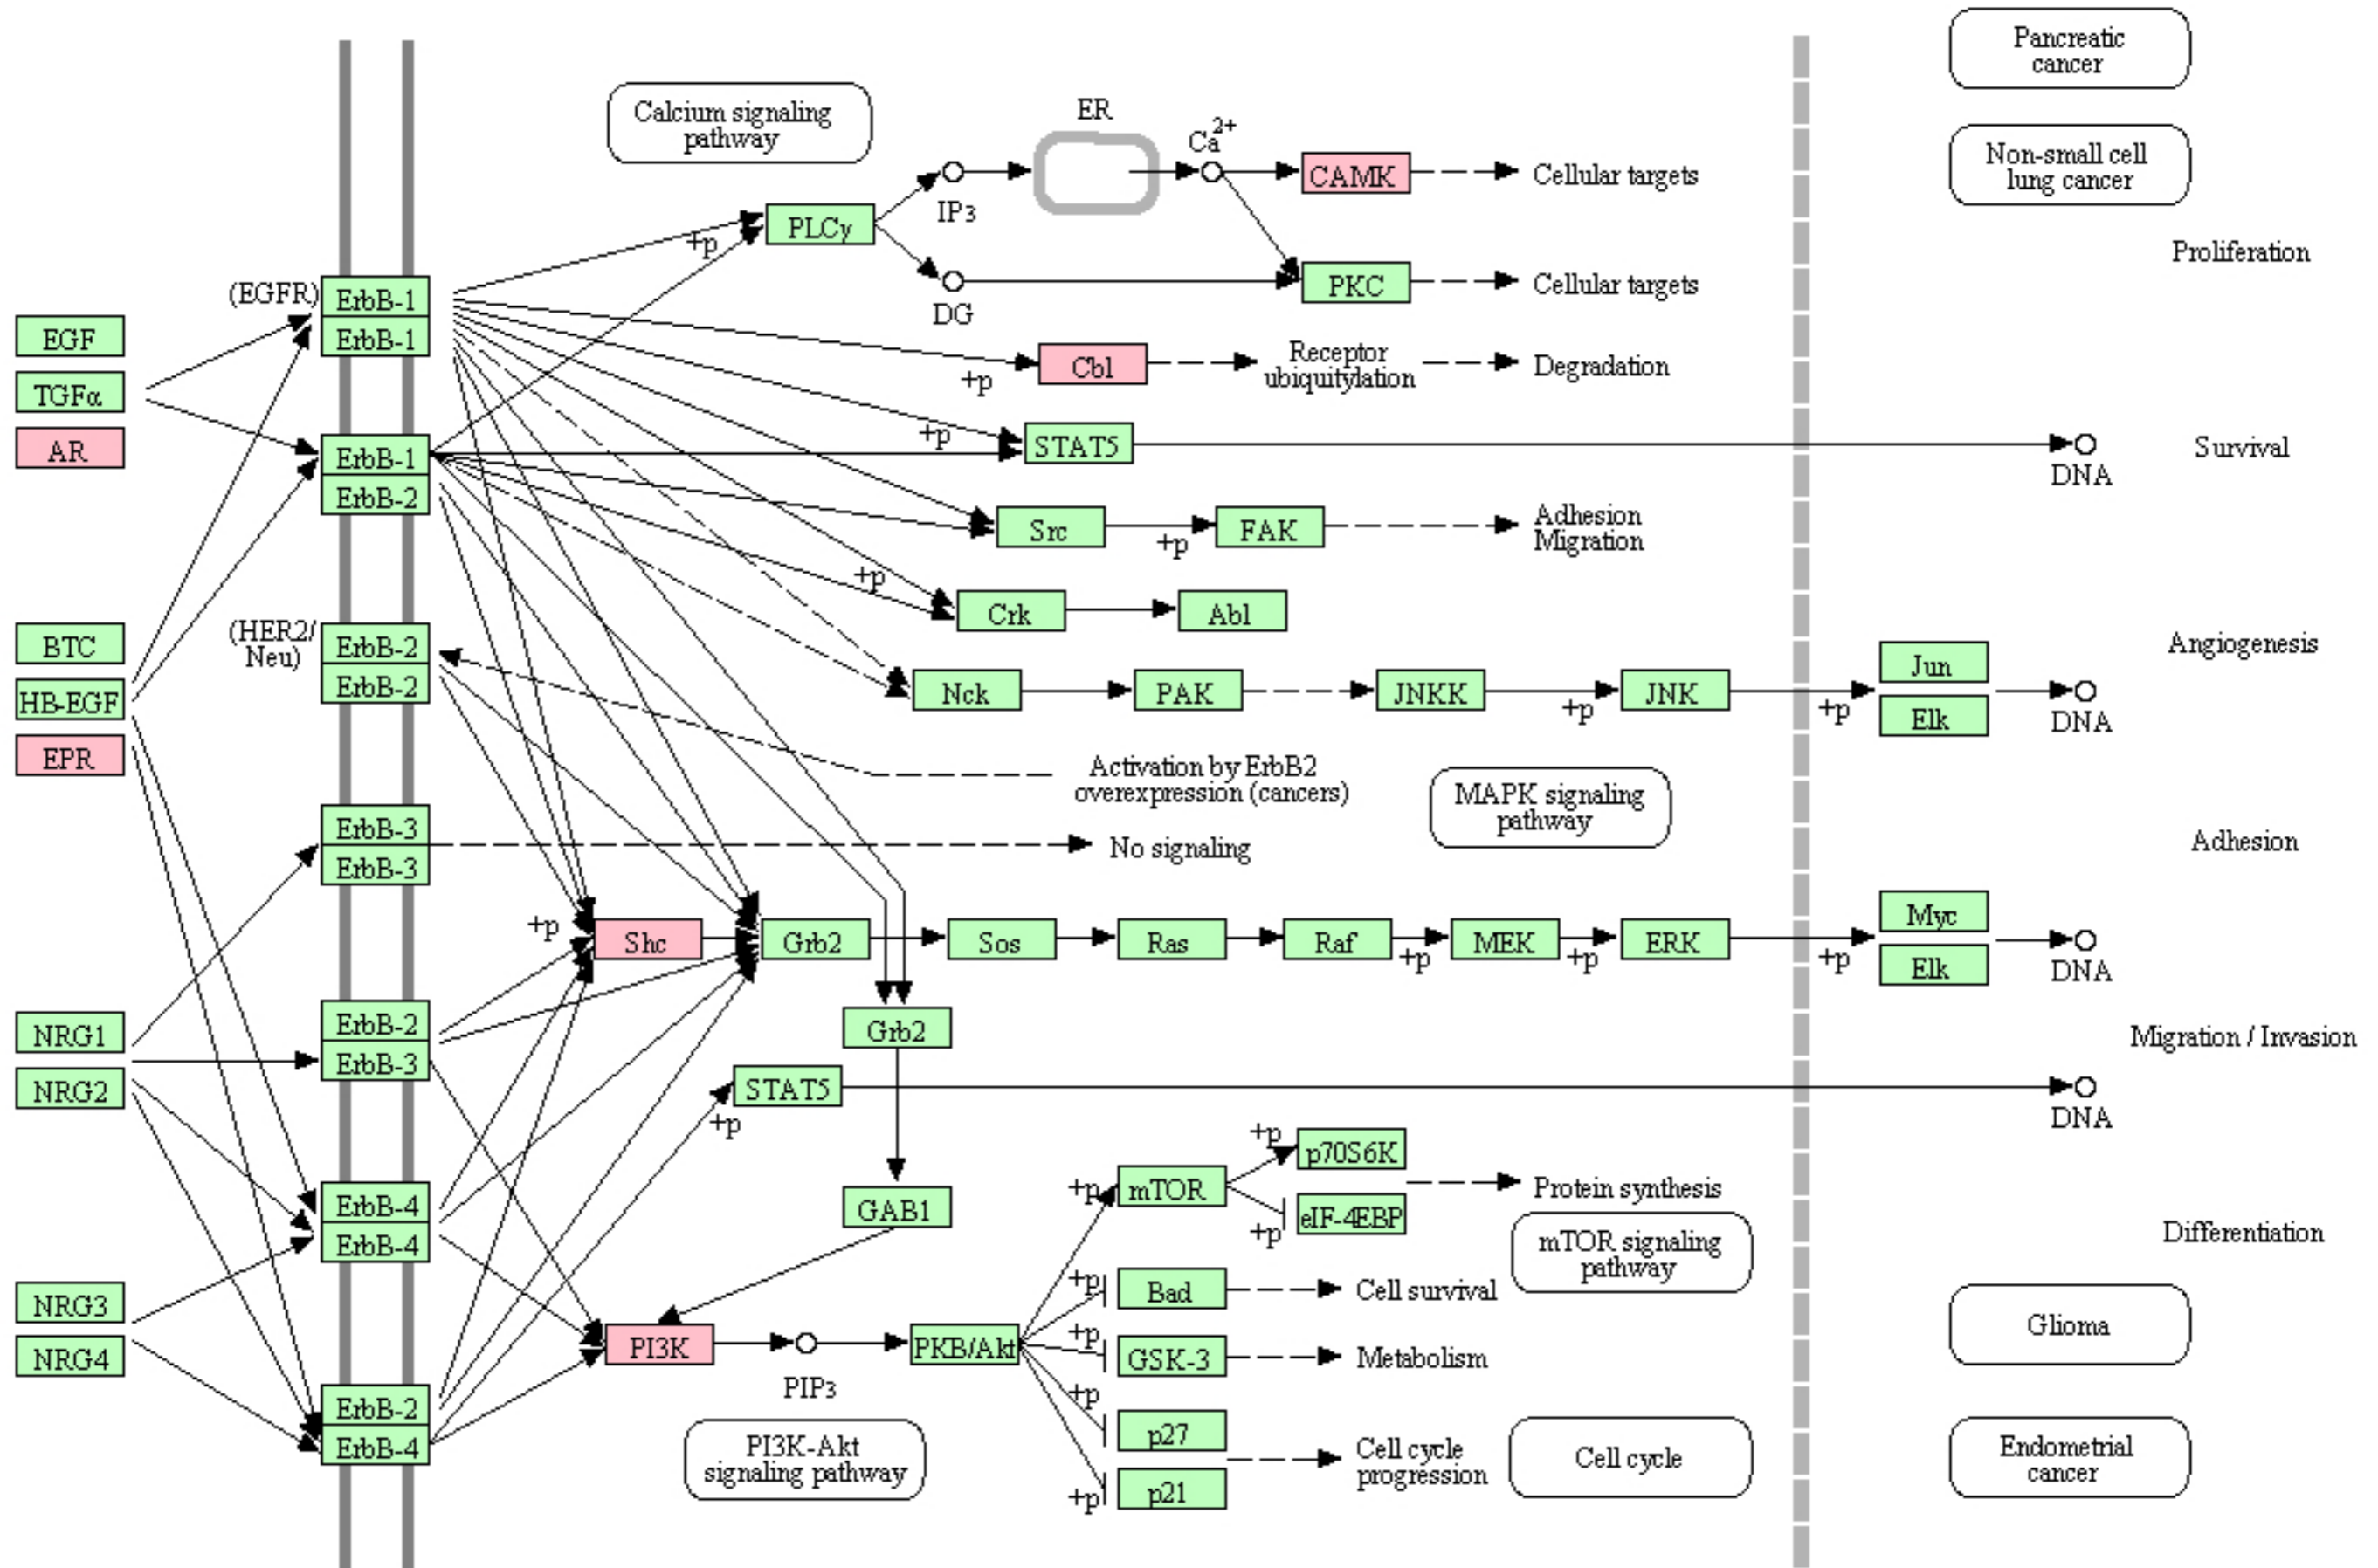

# mTOR Signaling Pathways

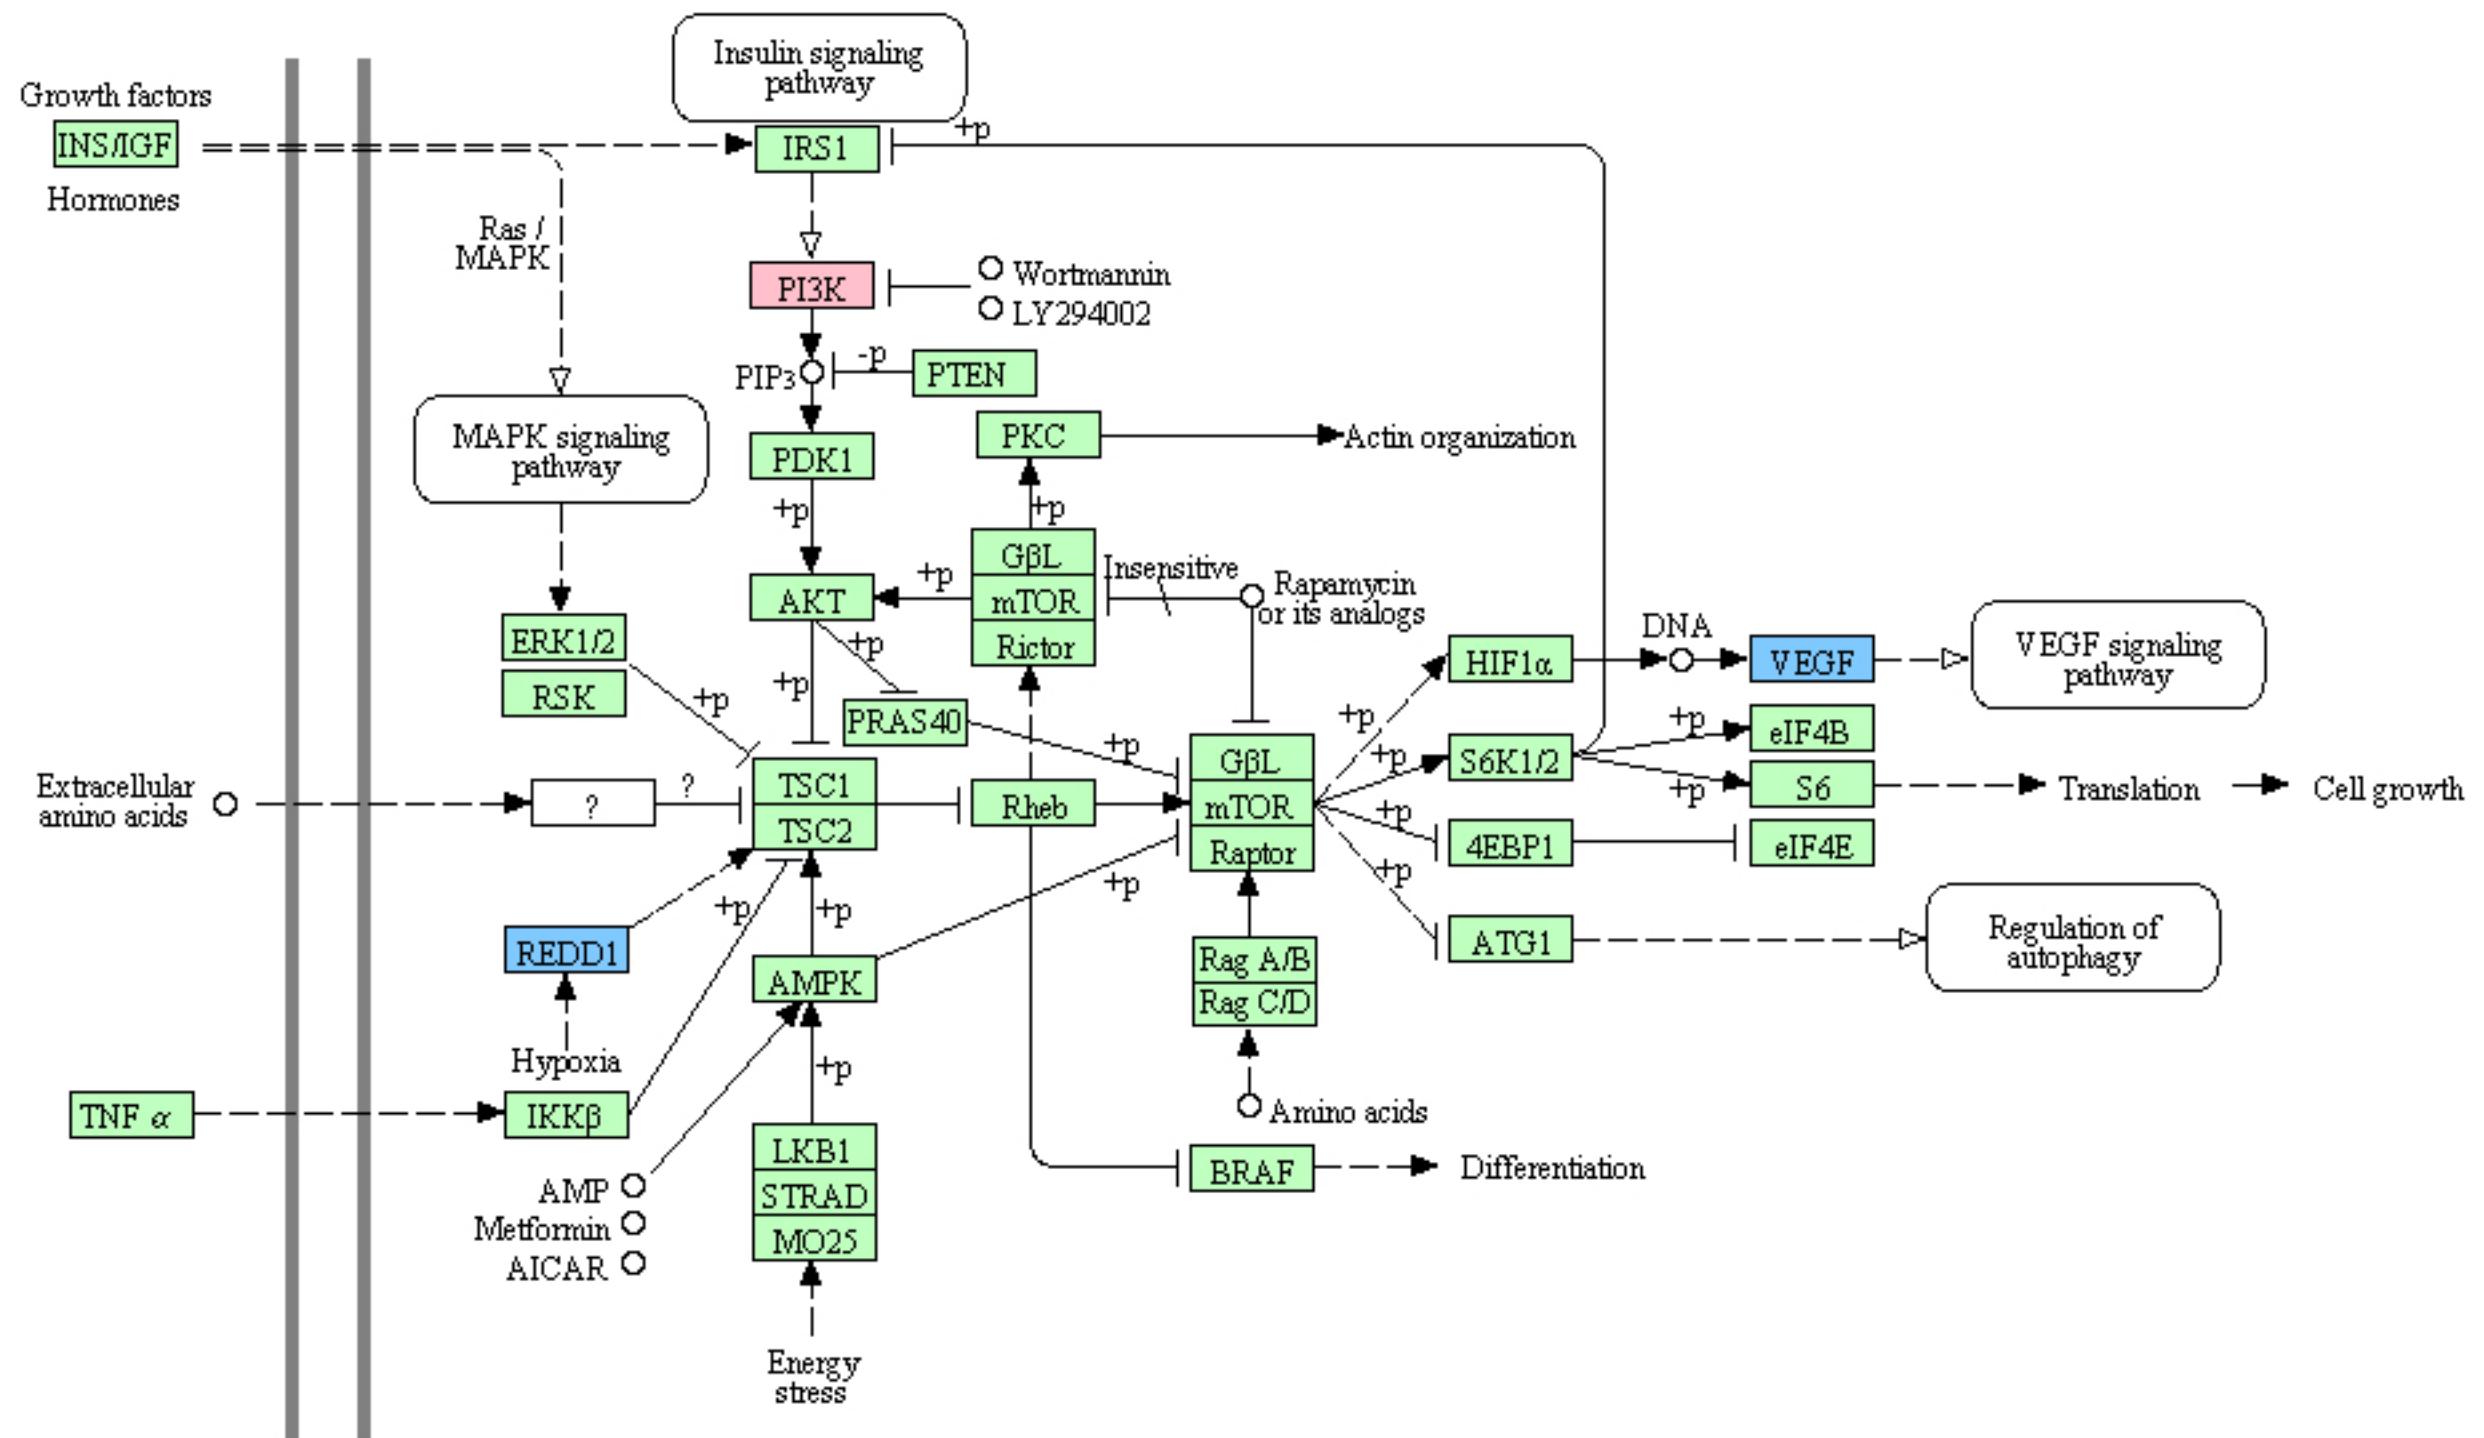

# TGF- $\beta$ Signaling Pathways

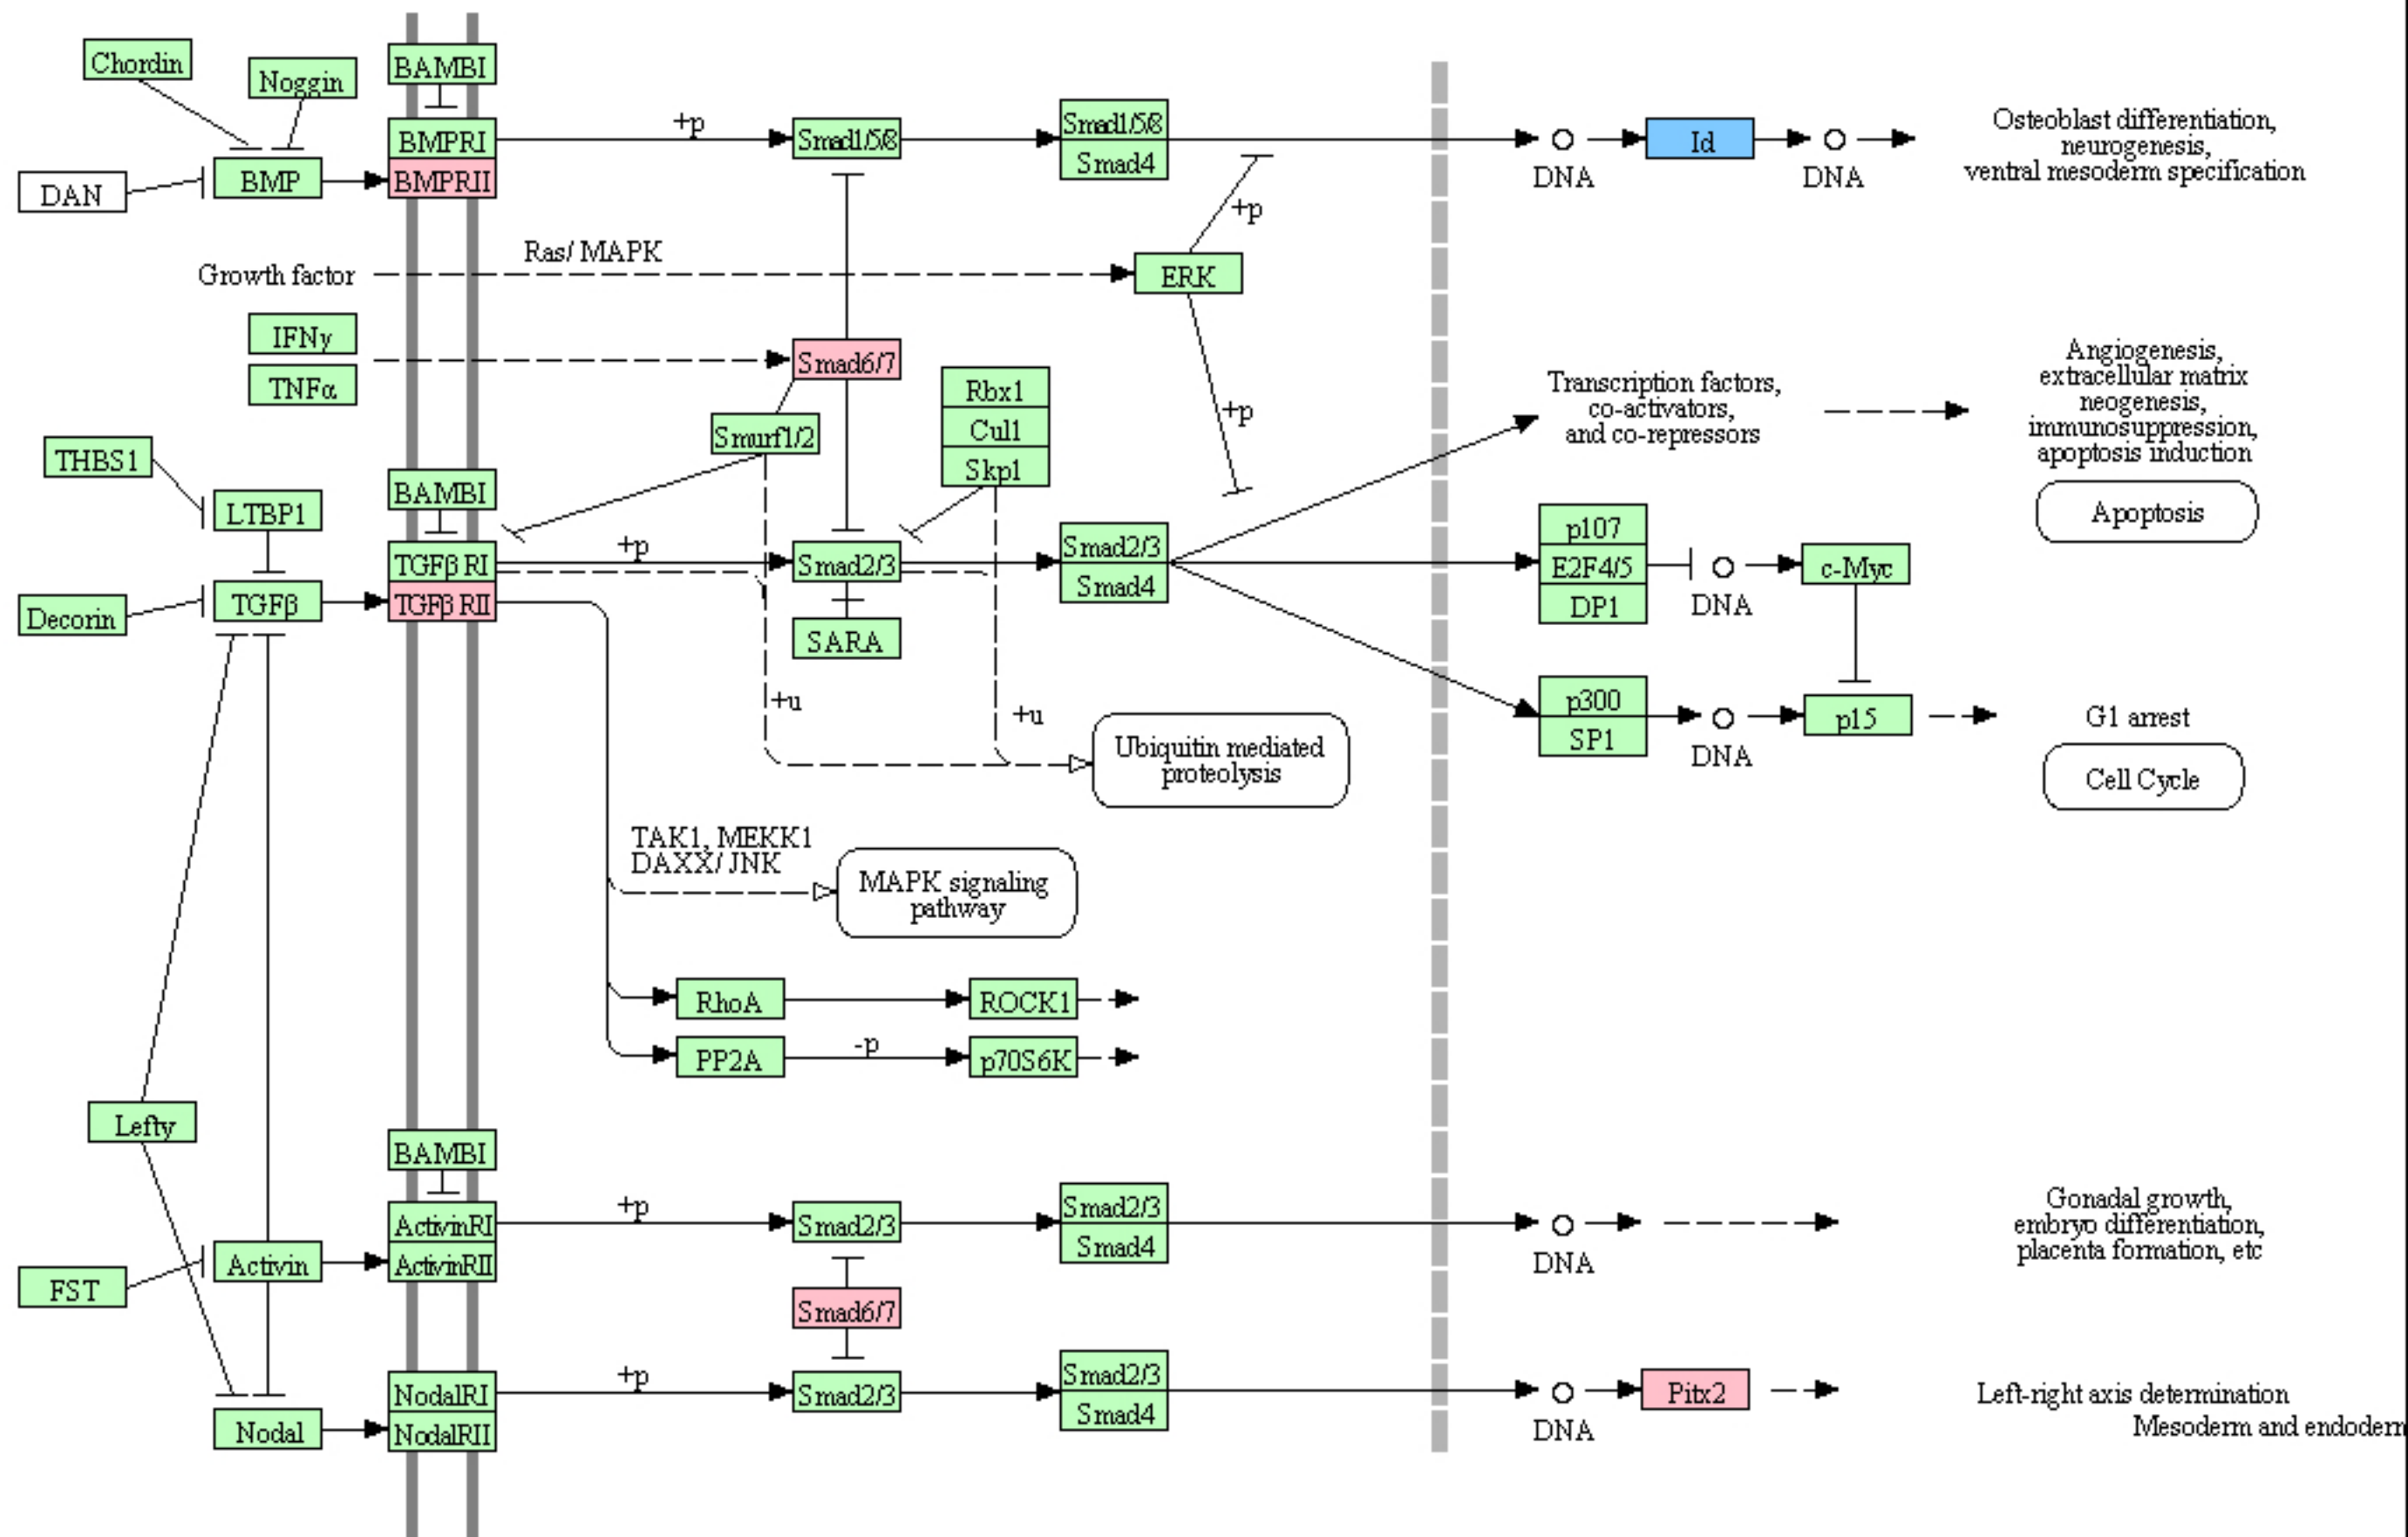

# Toll-Like Receptor Signaling Pathway

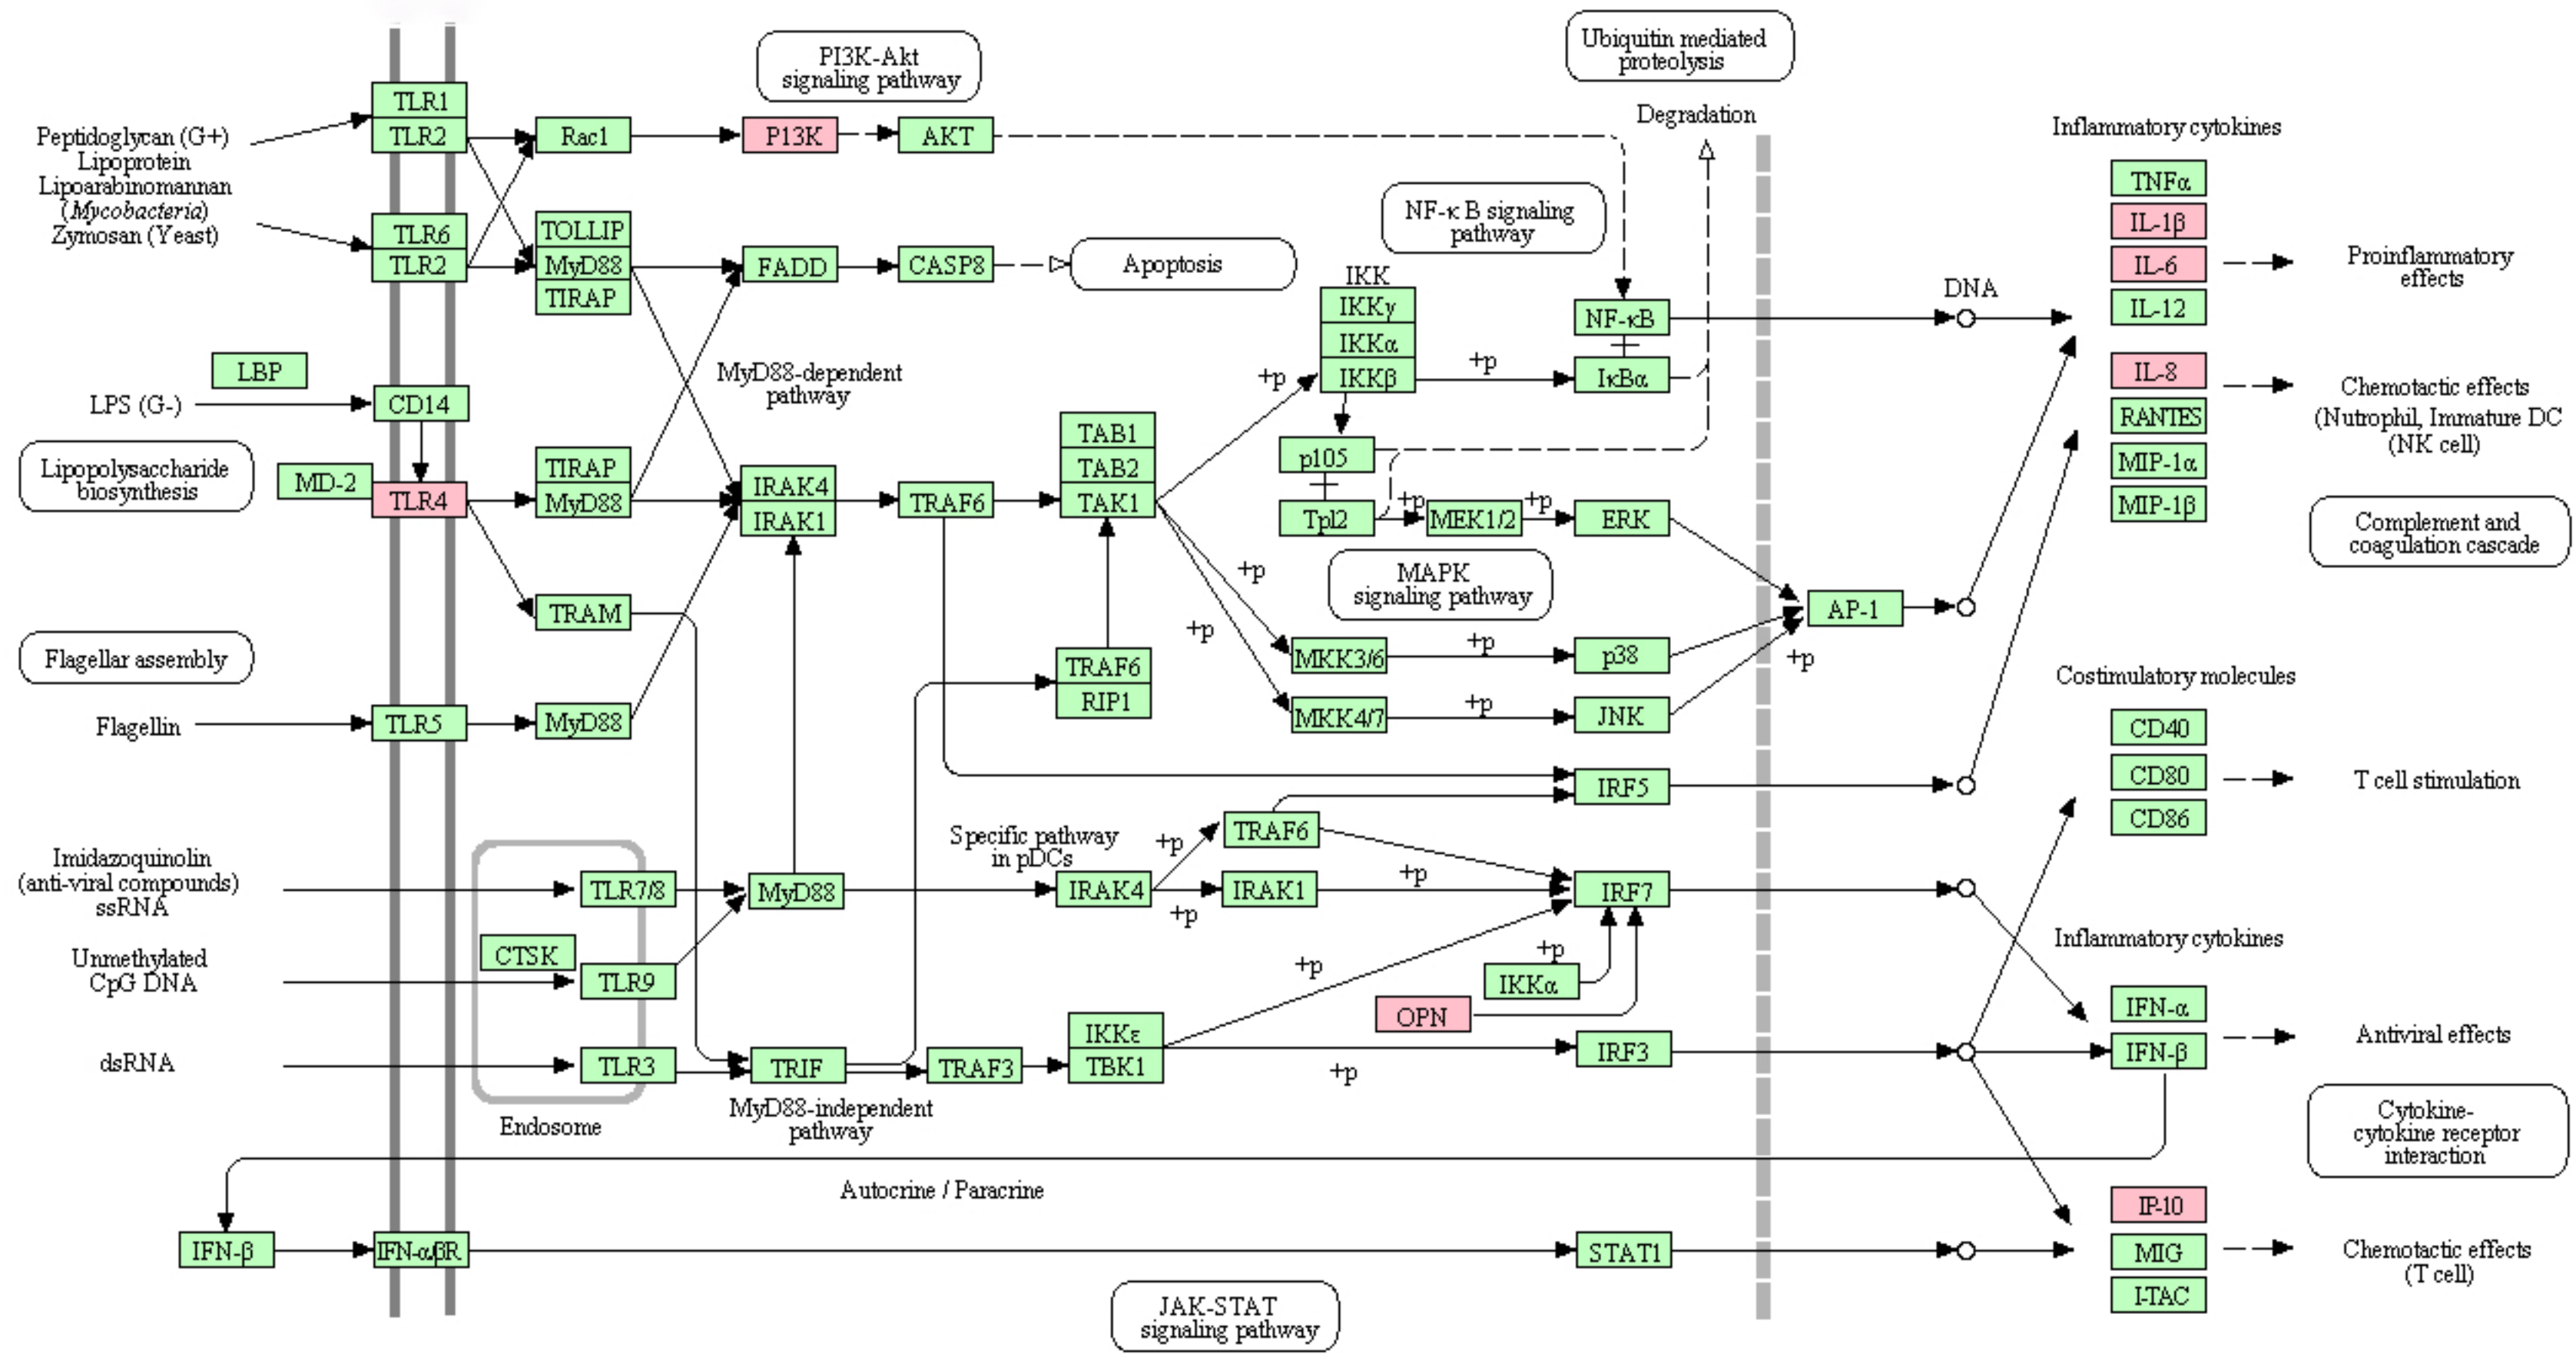

# JAK-STAT Signaling Pathway

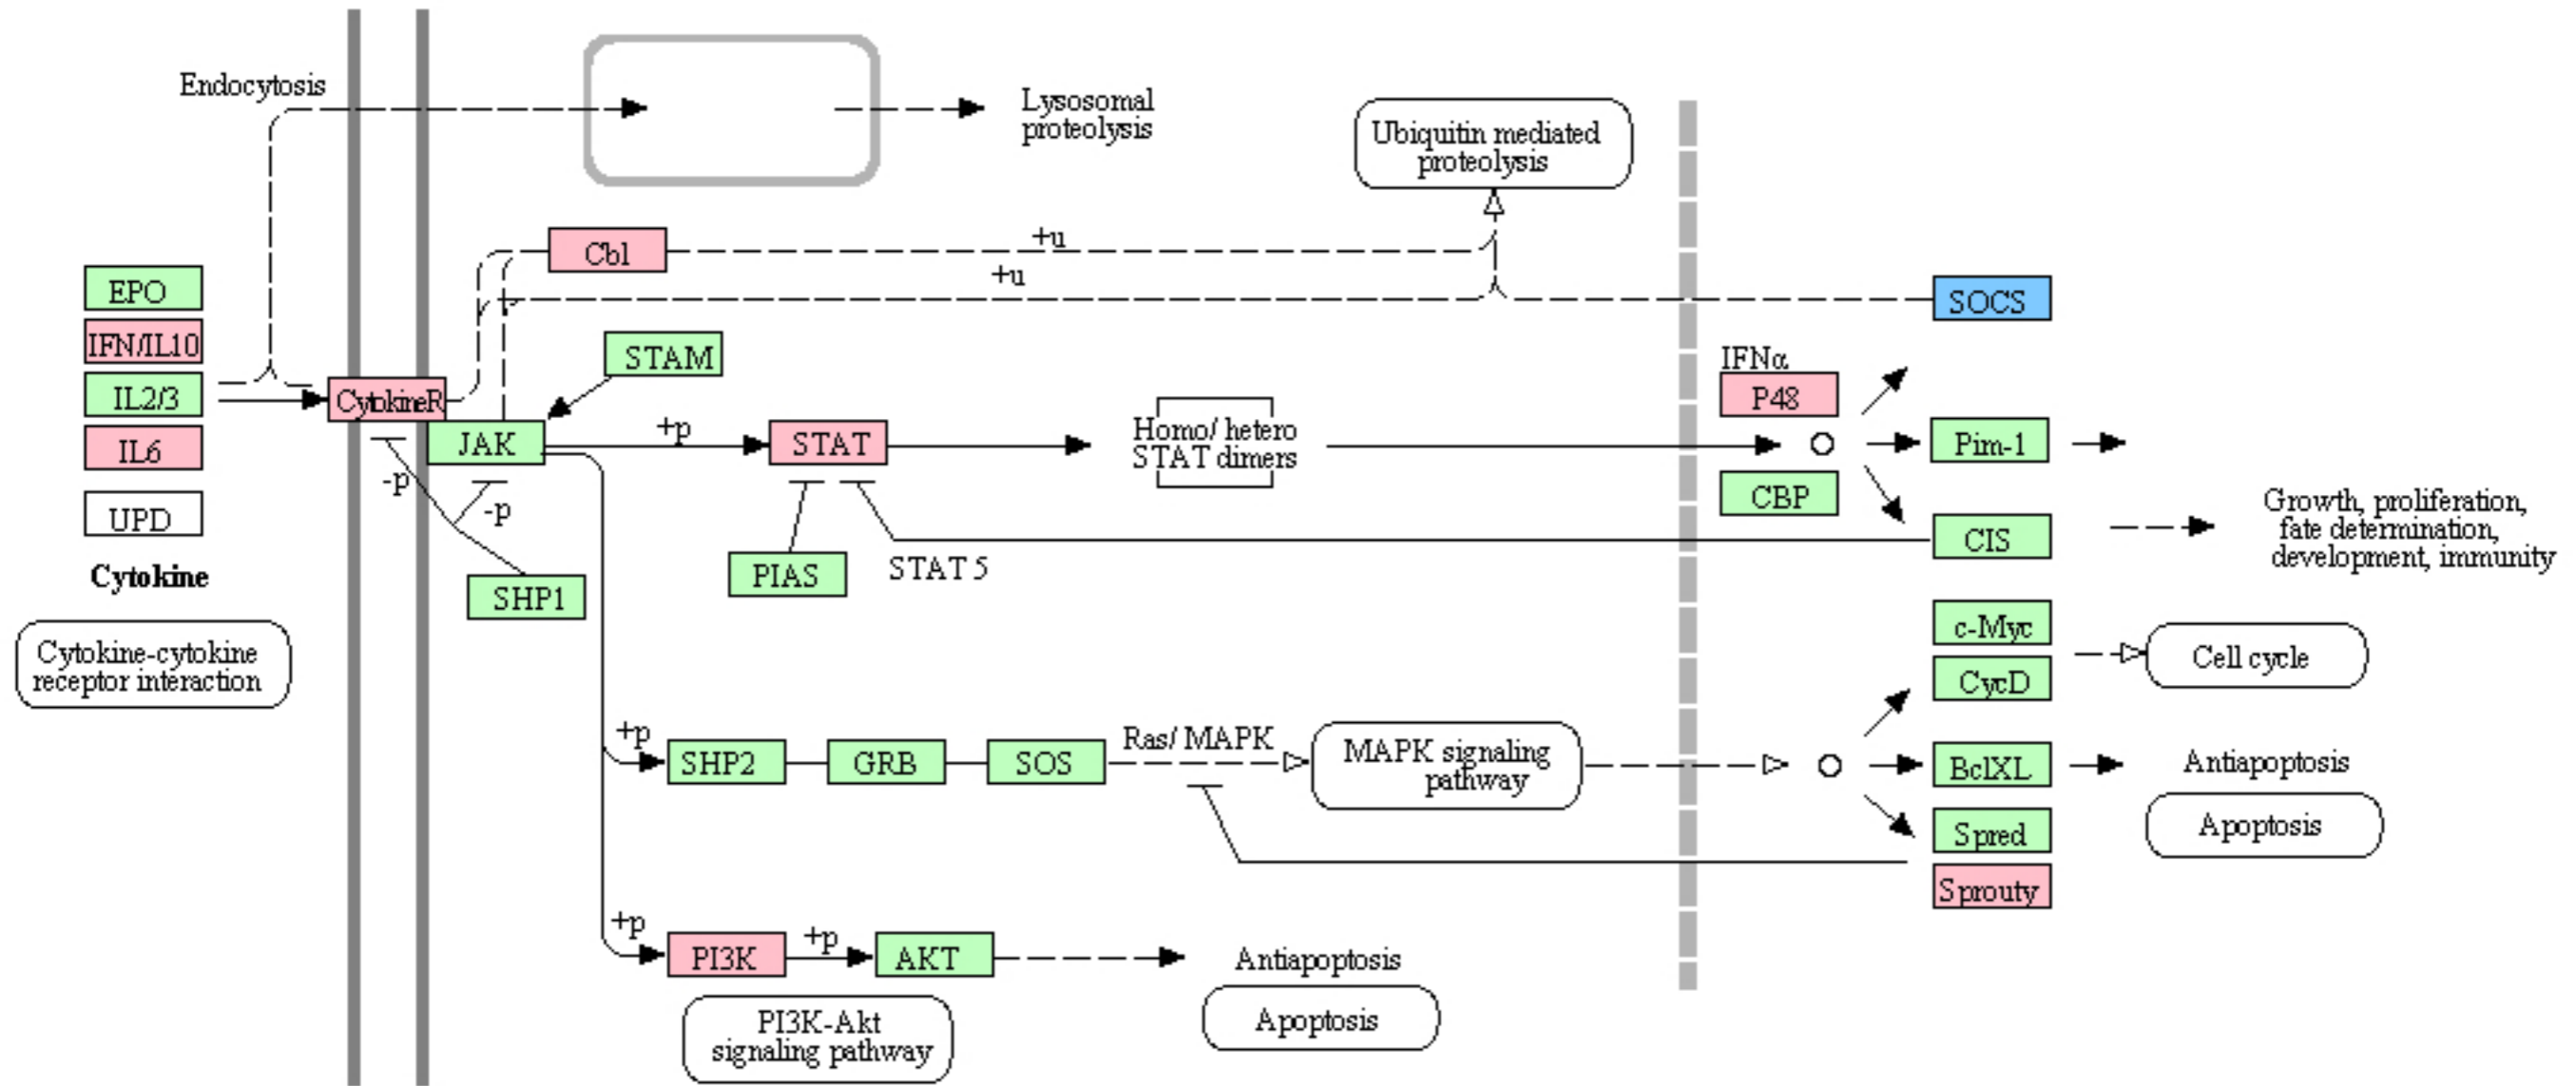

# Insulin Signaling Pathway

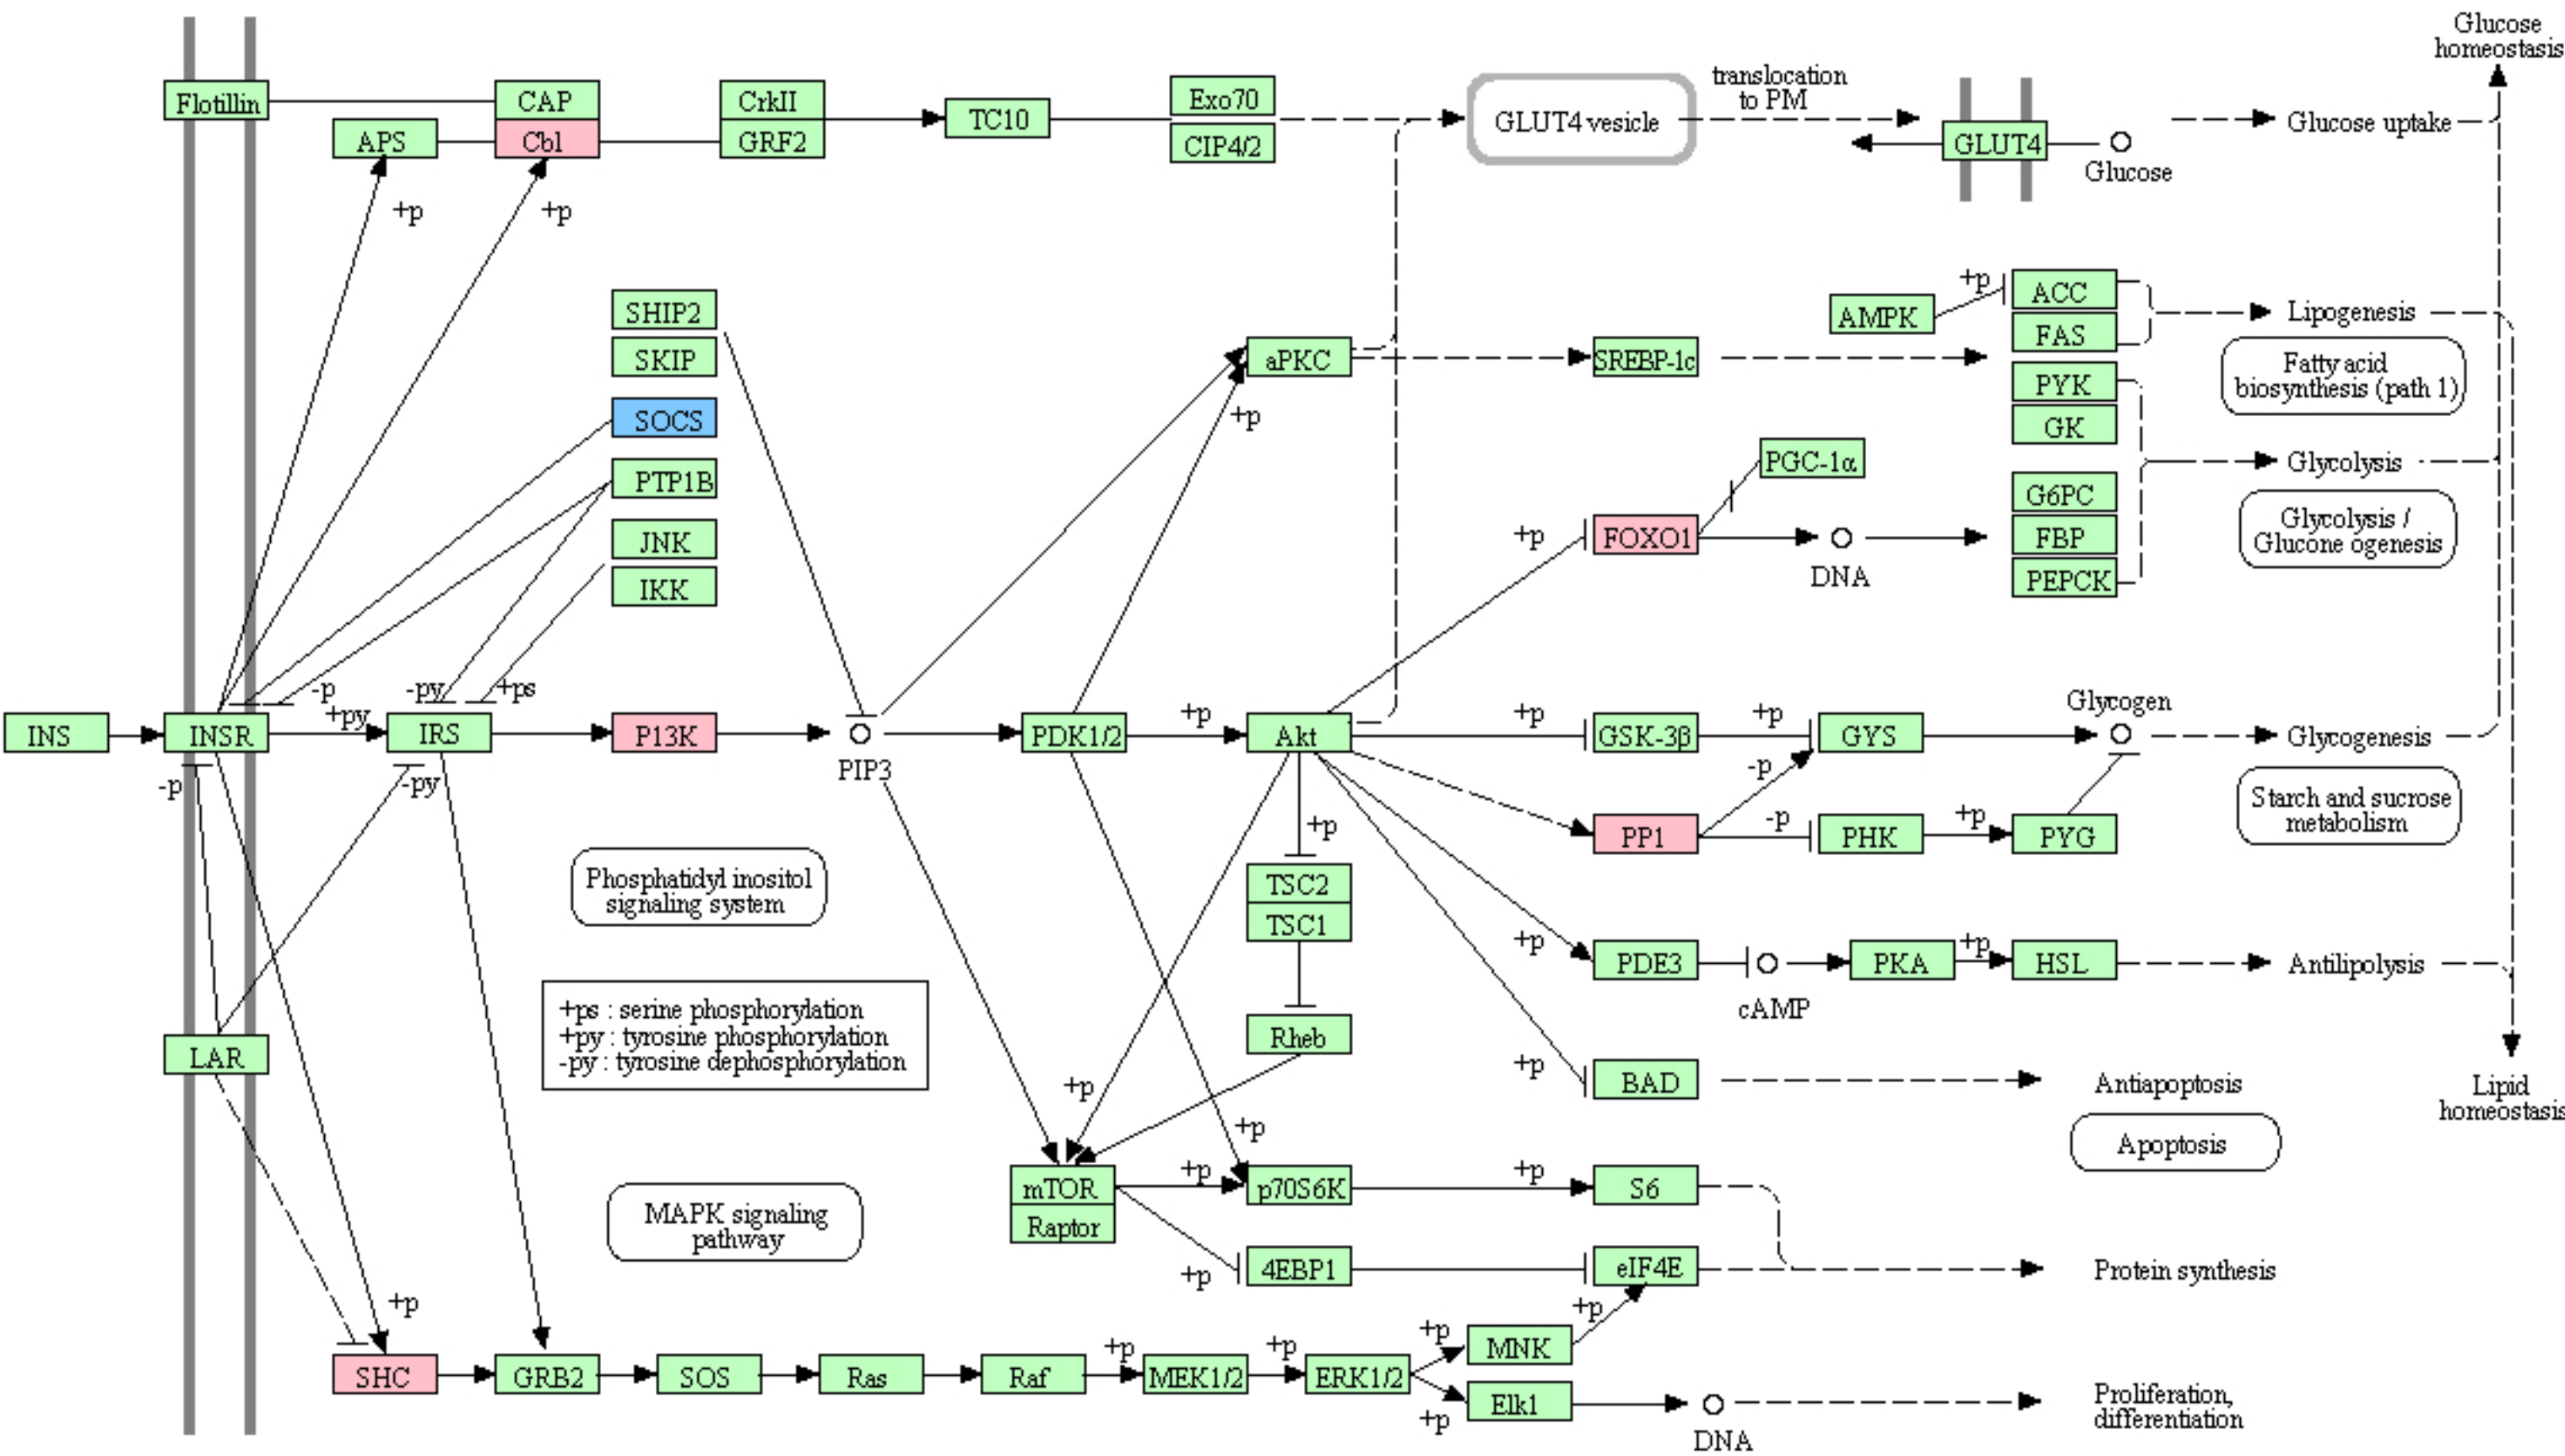

## MAP Signaling Pathway

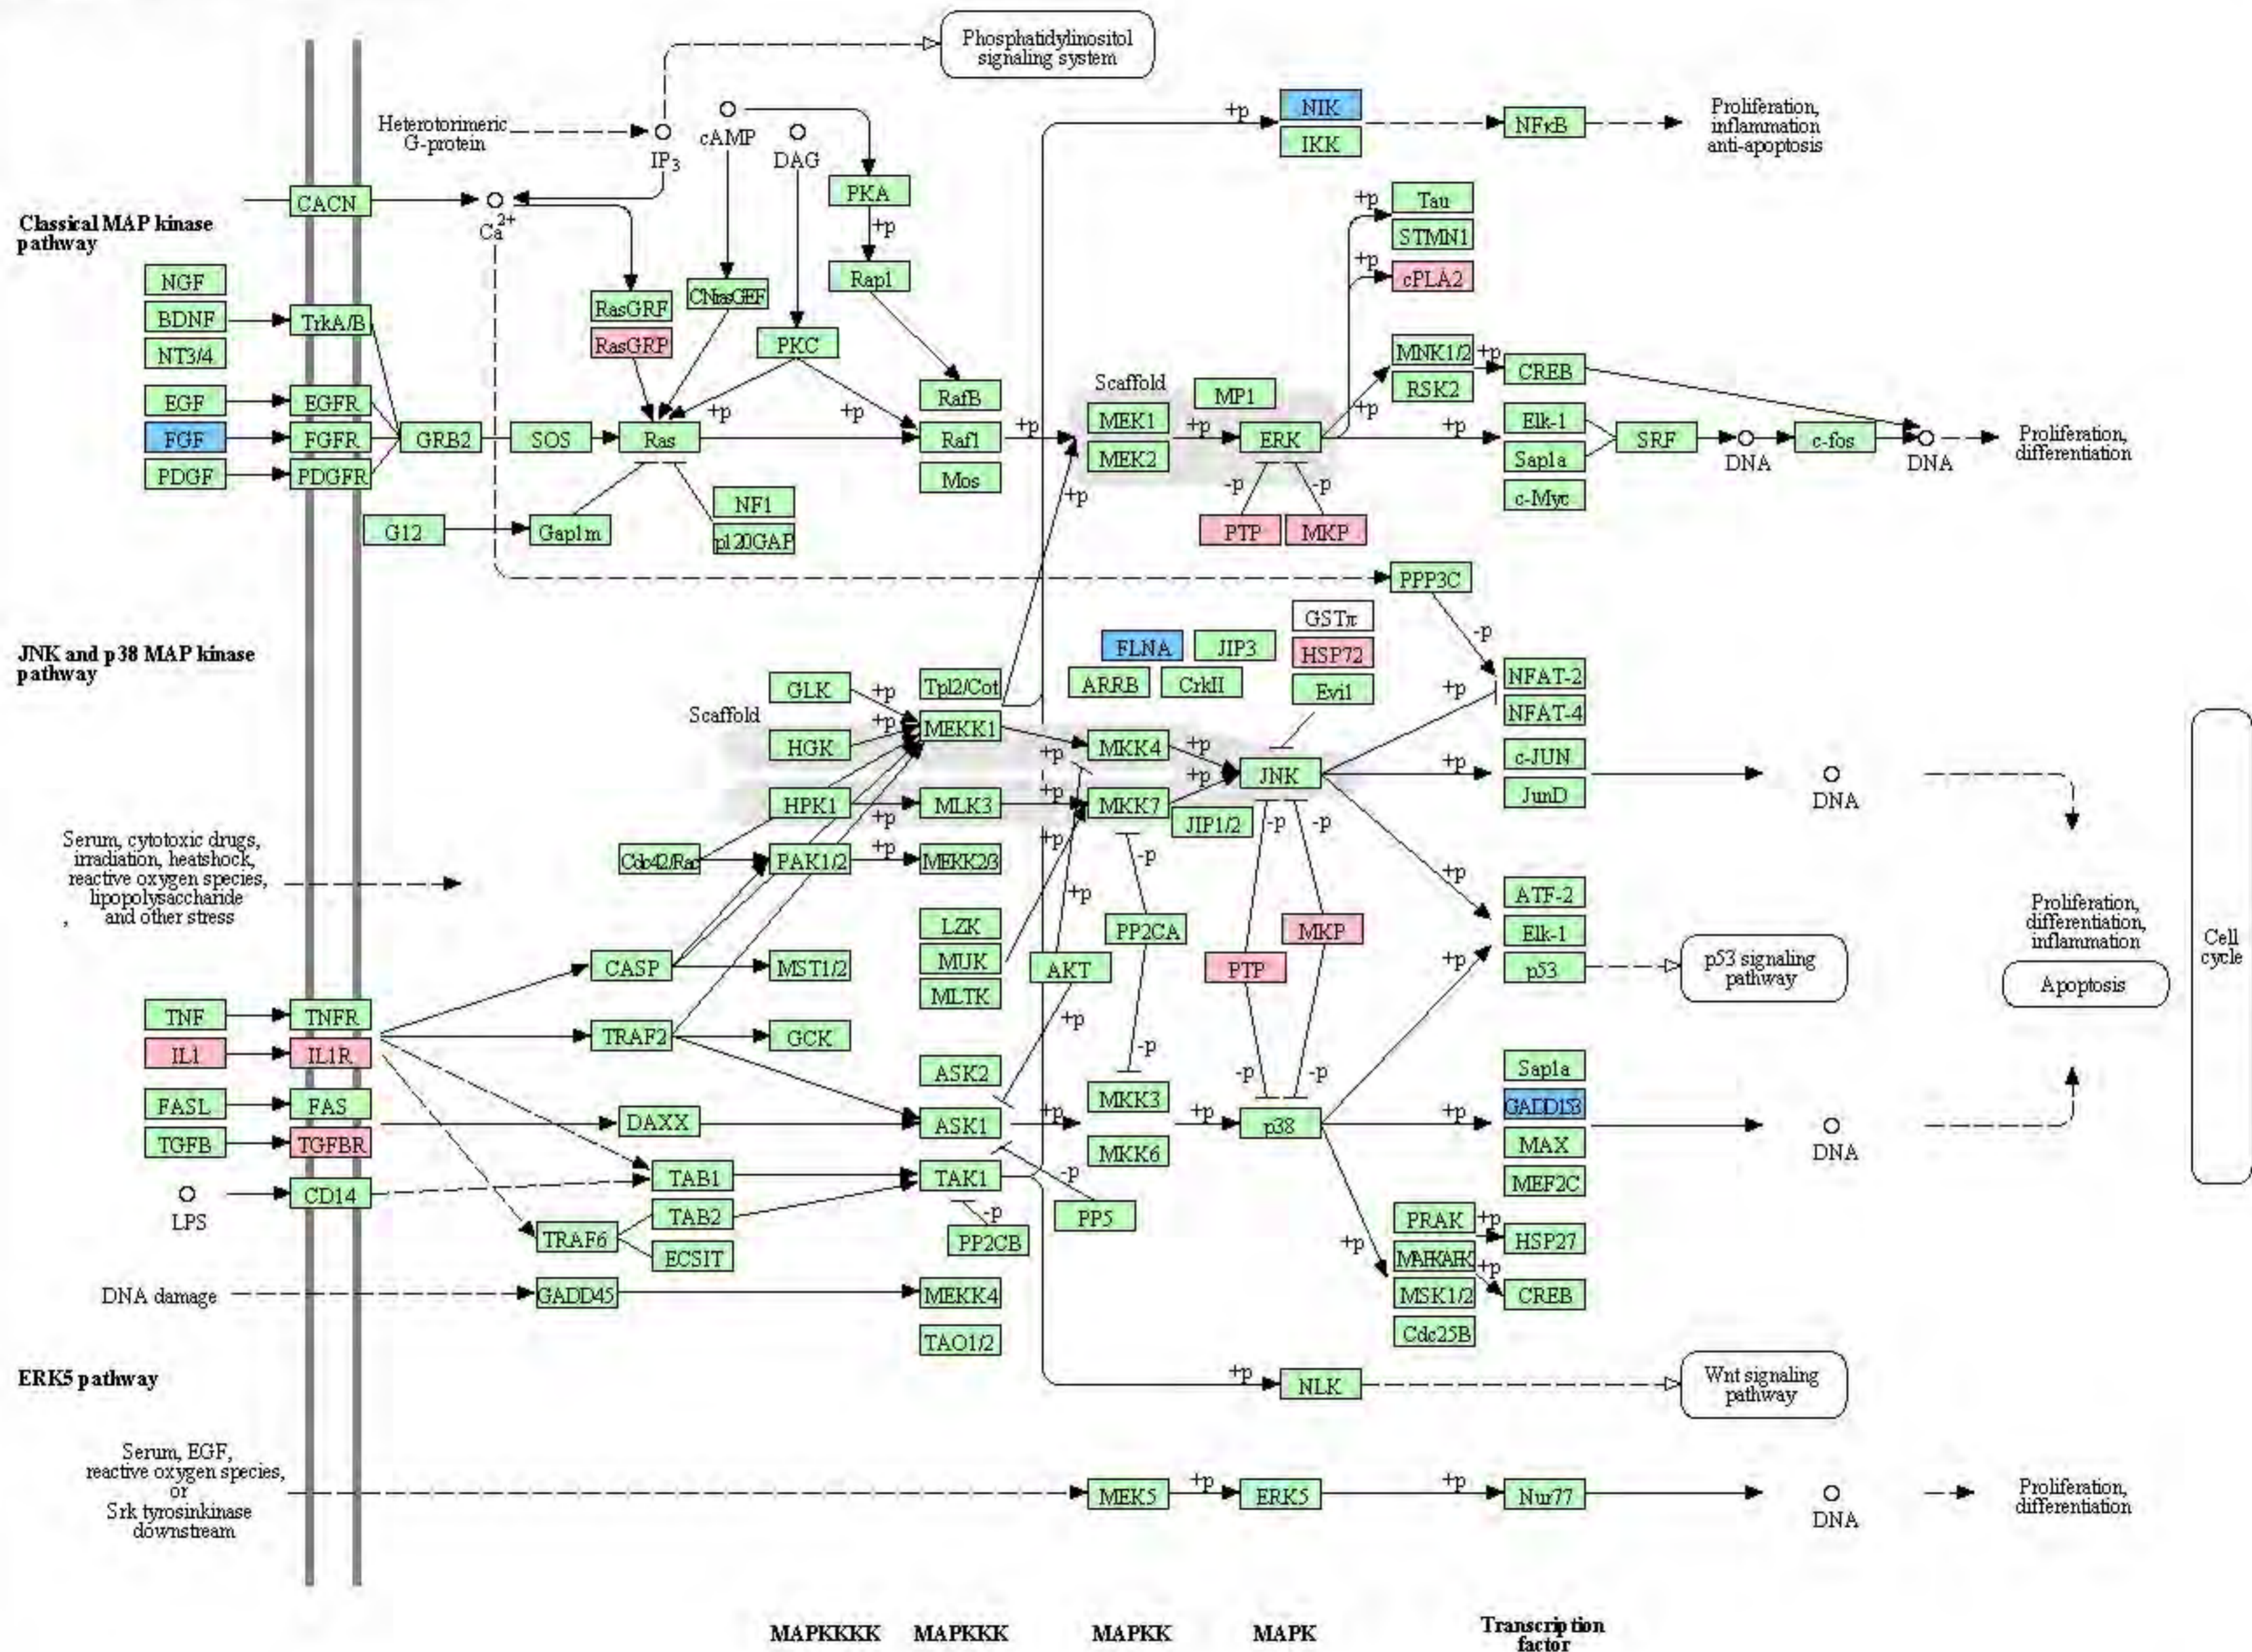

# Chemokine Signaling Pathway

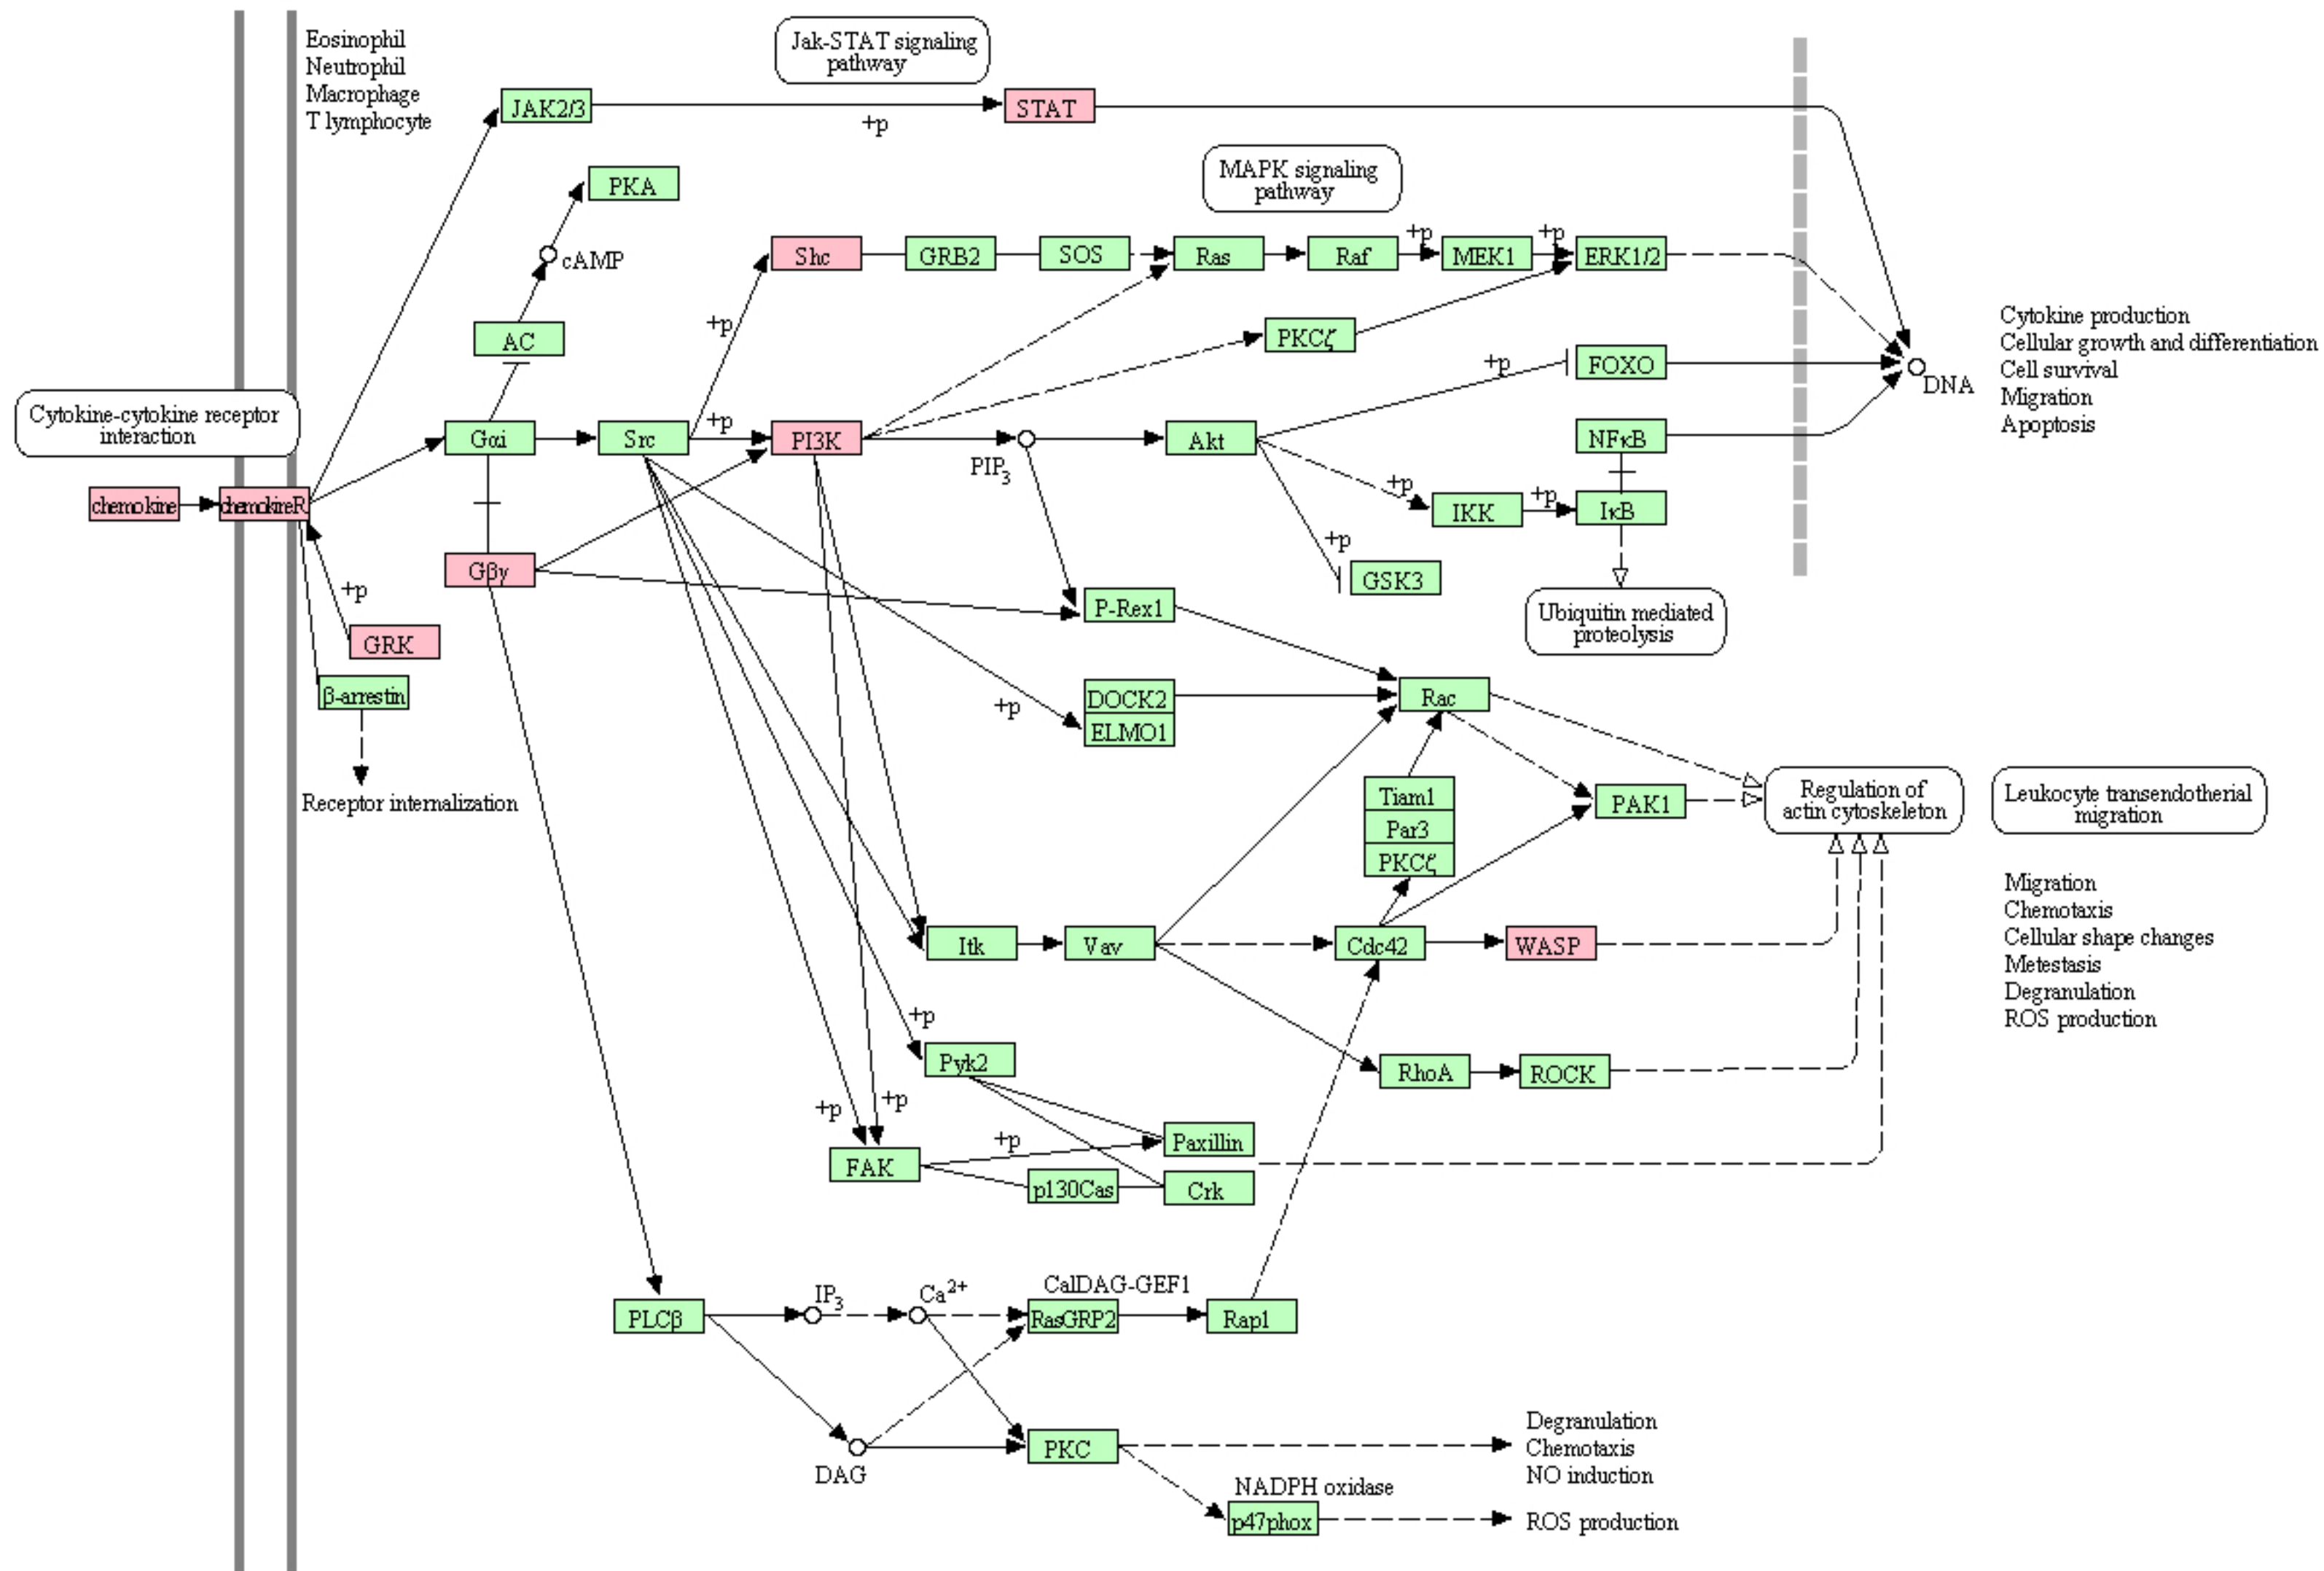

Pathways in Cancer

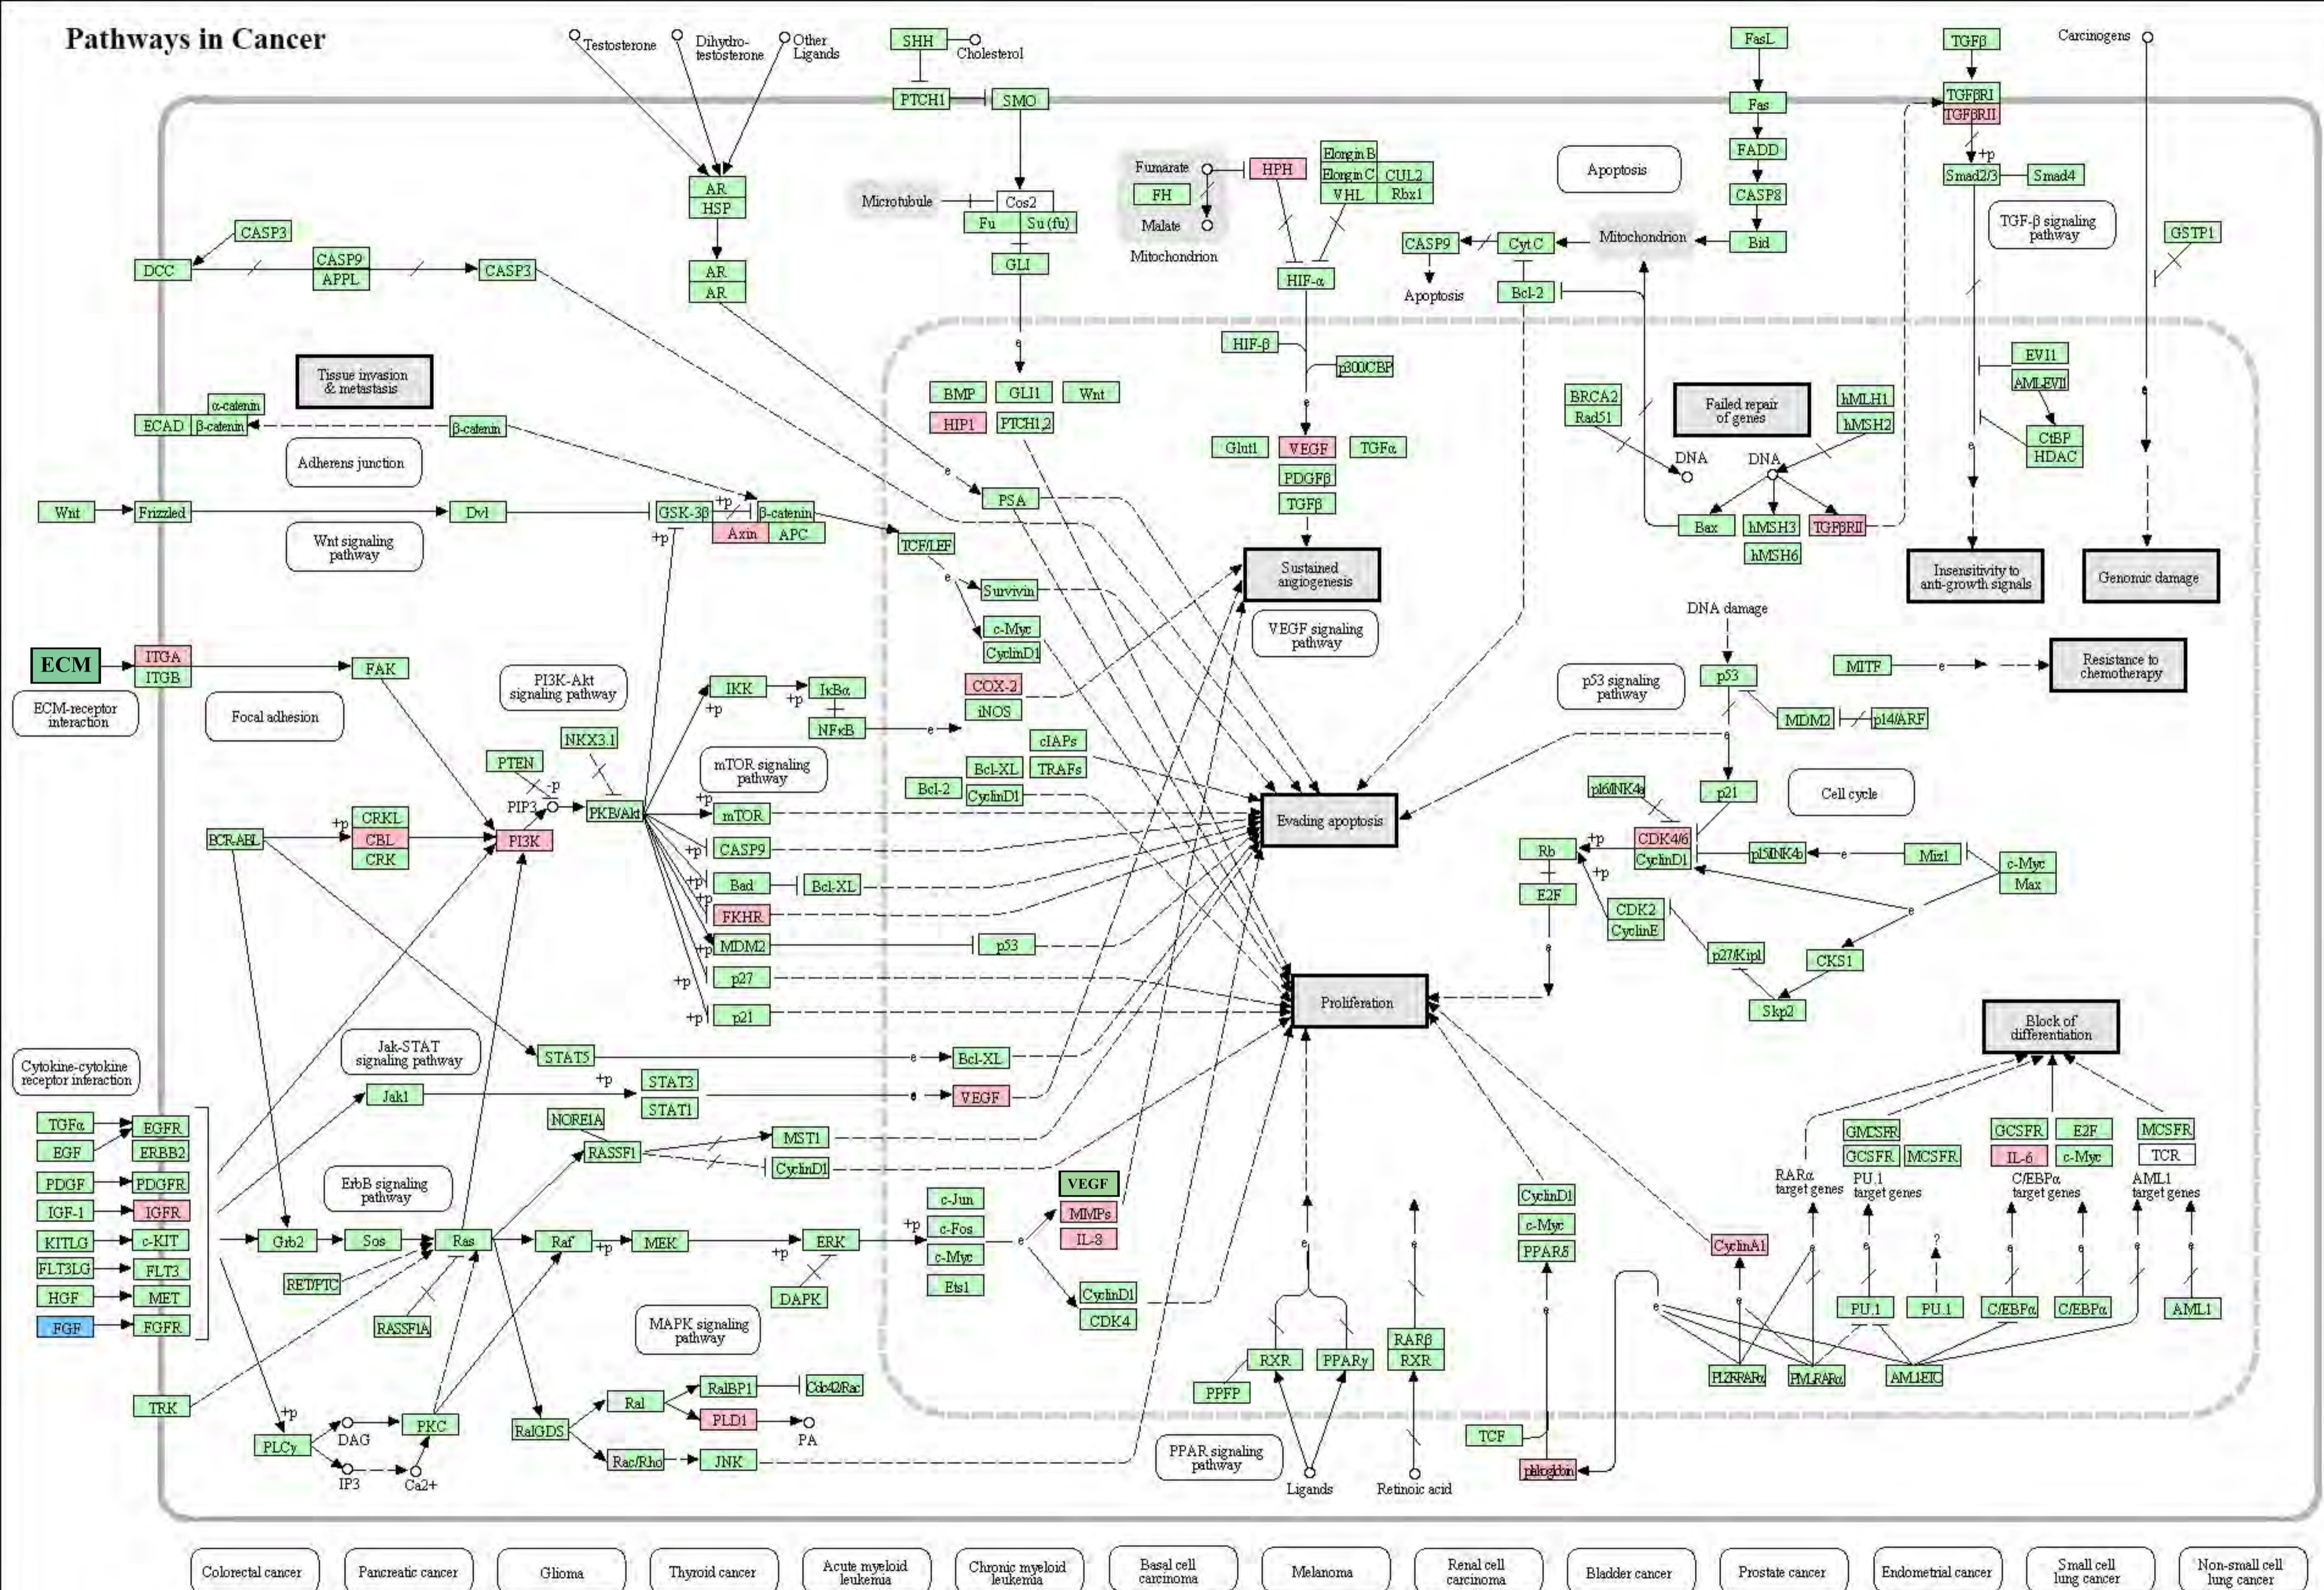

# Pancreatic Cancer

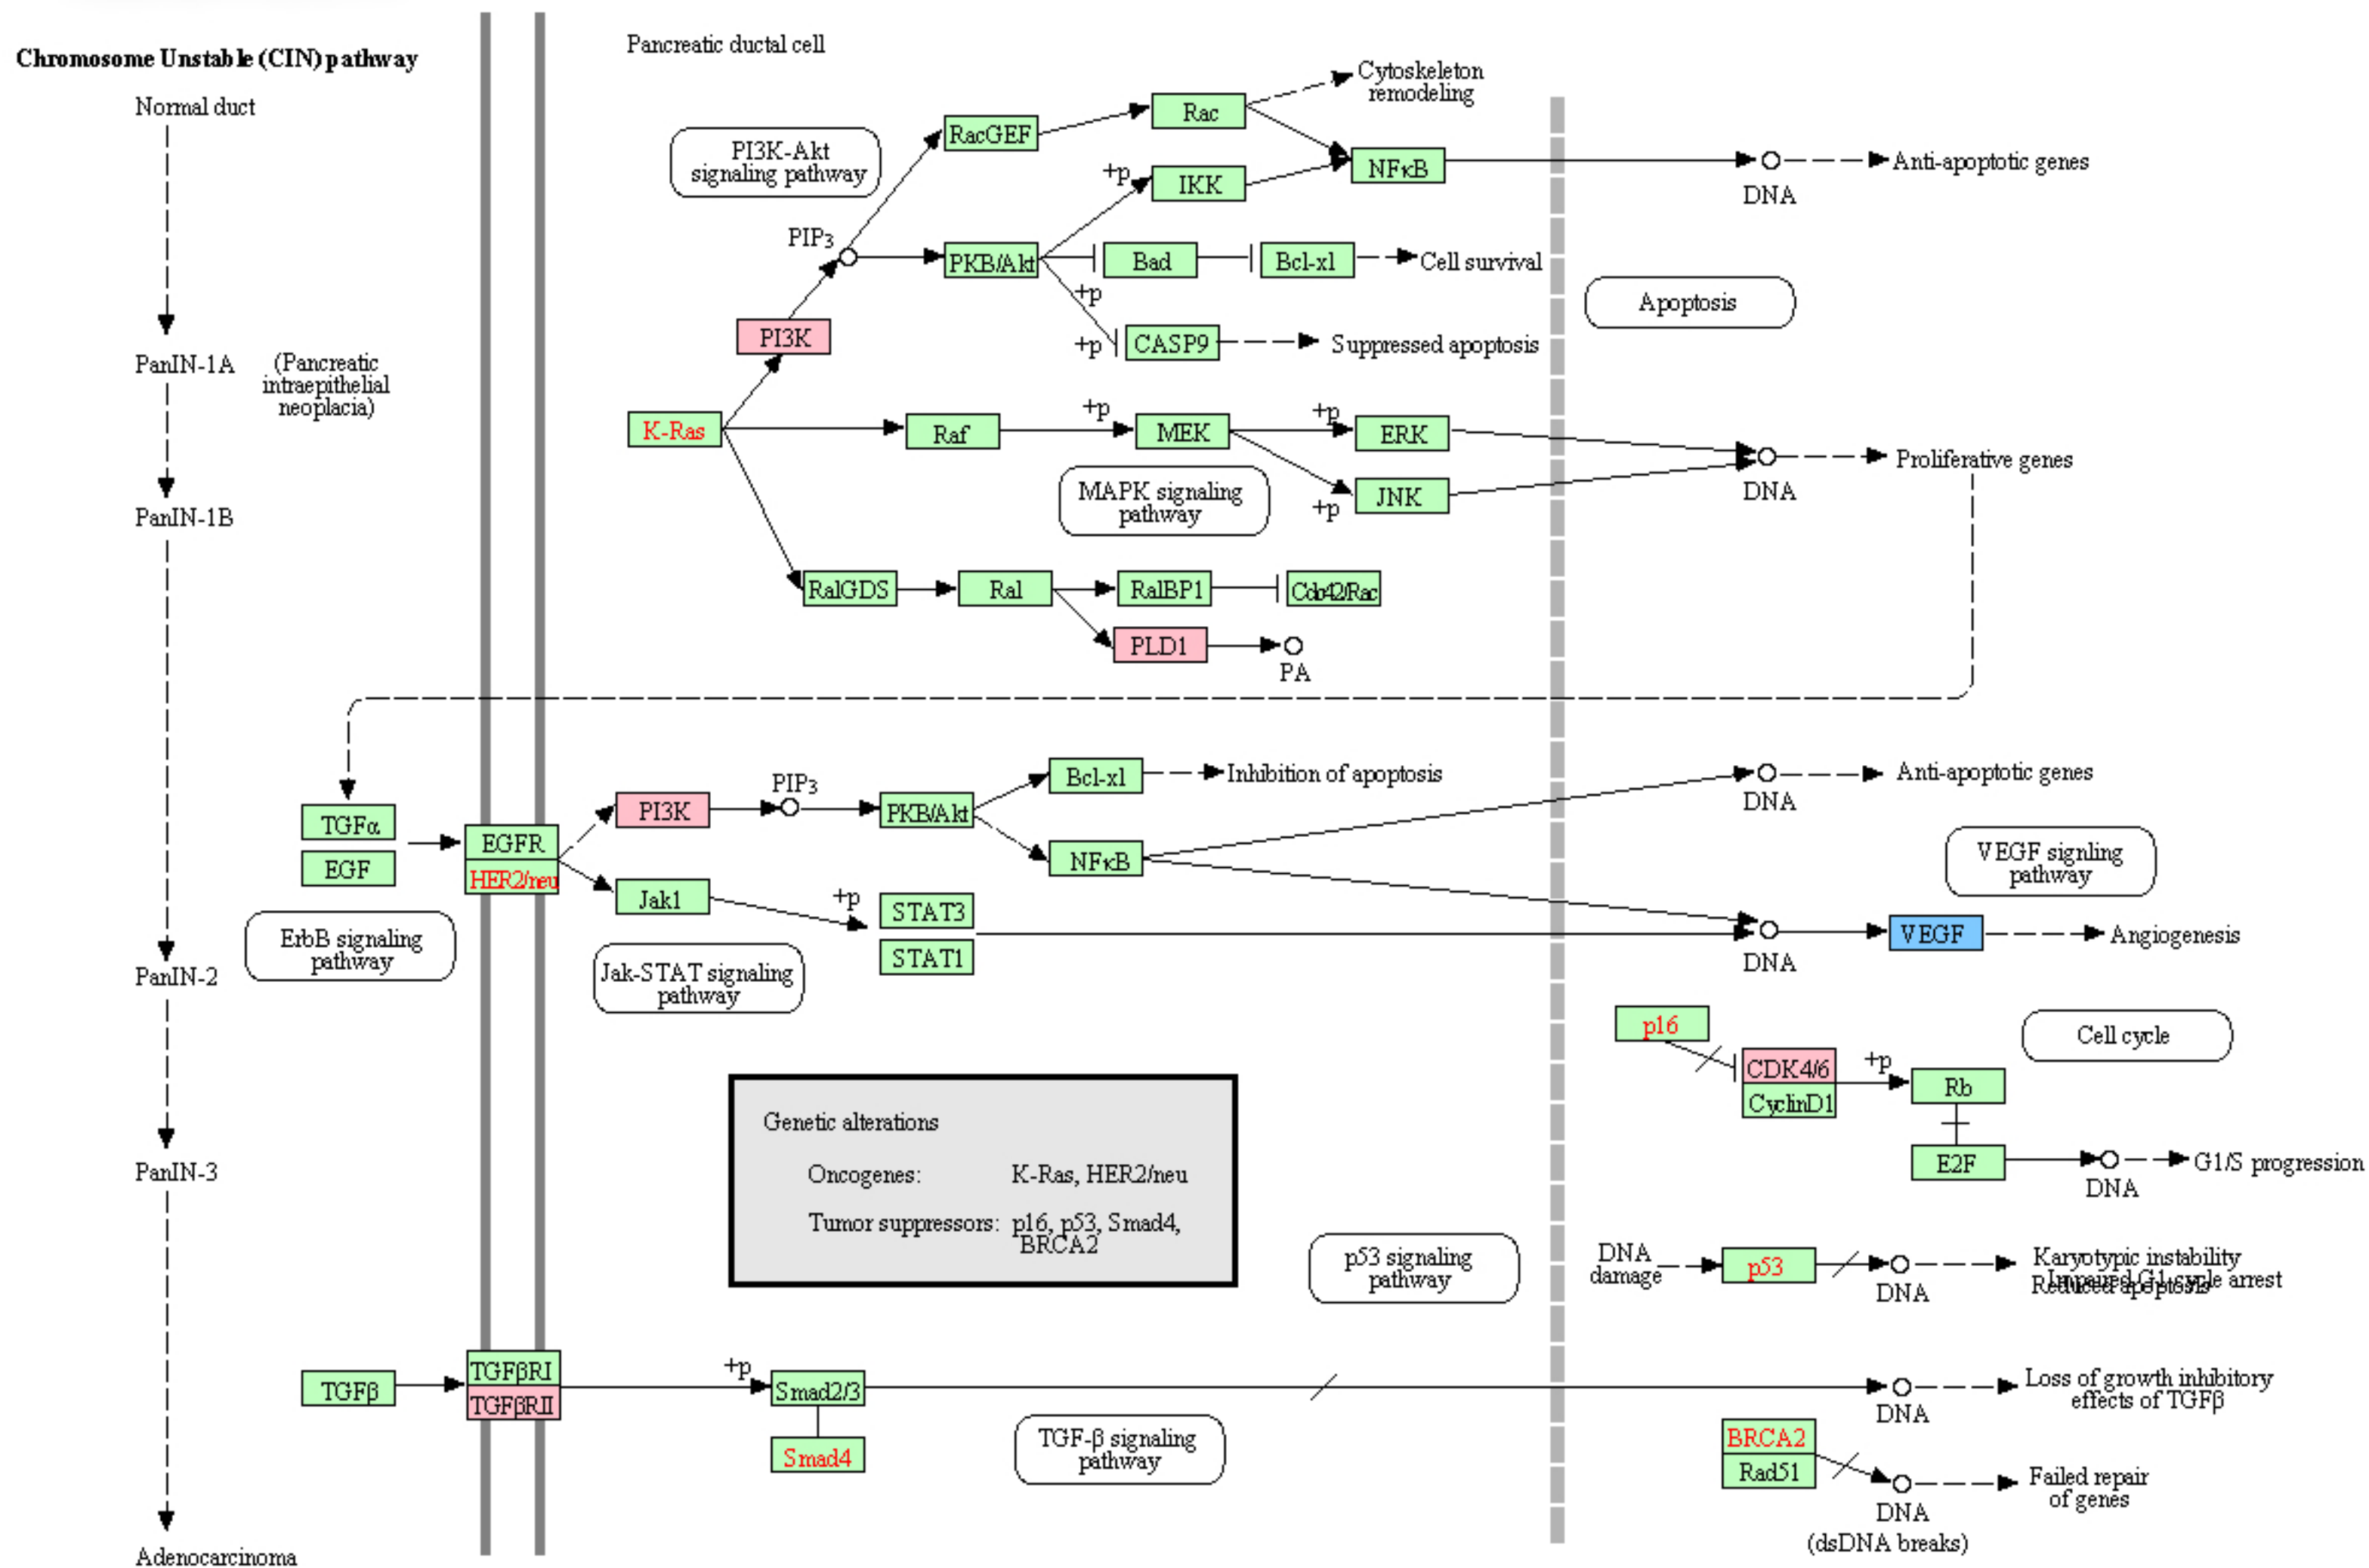

# Glioma

## De Novo pathway

Glial progenitor cell

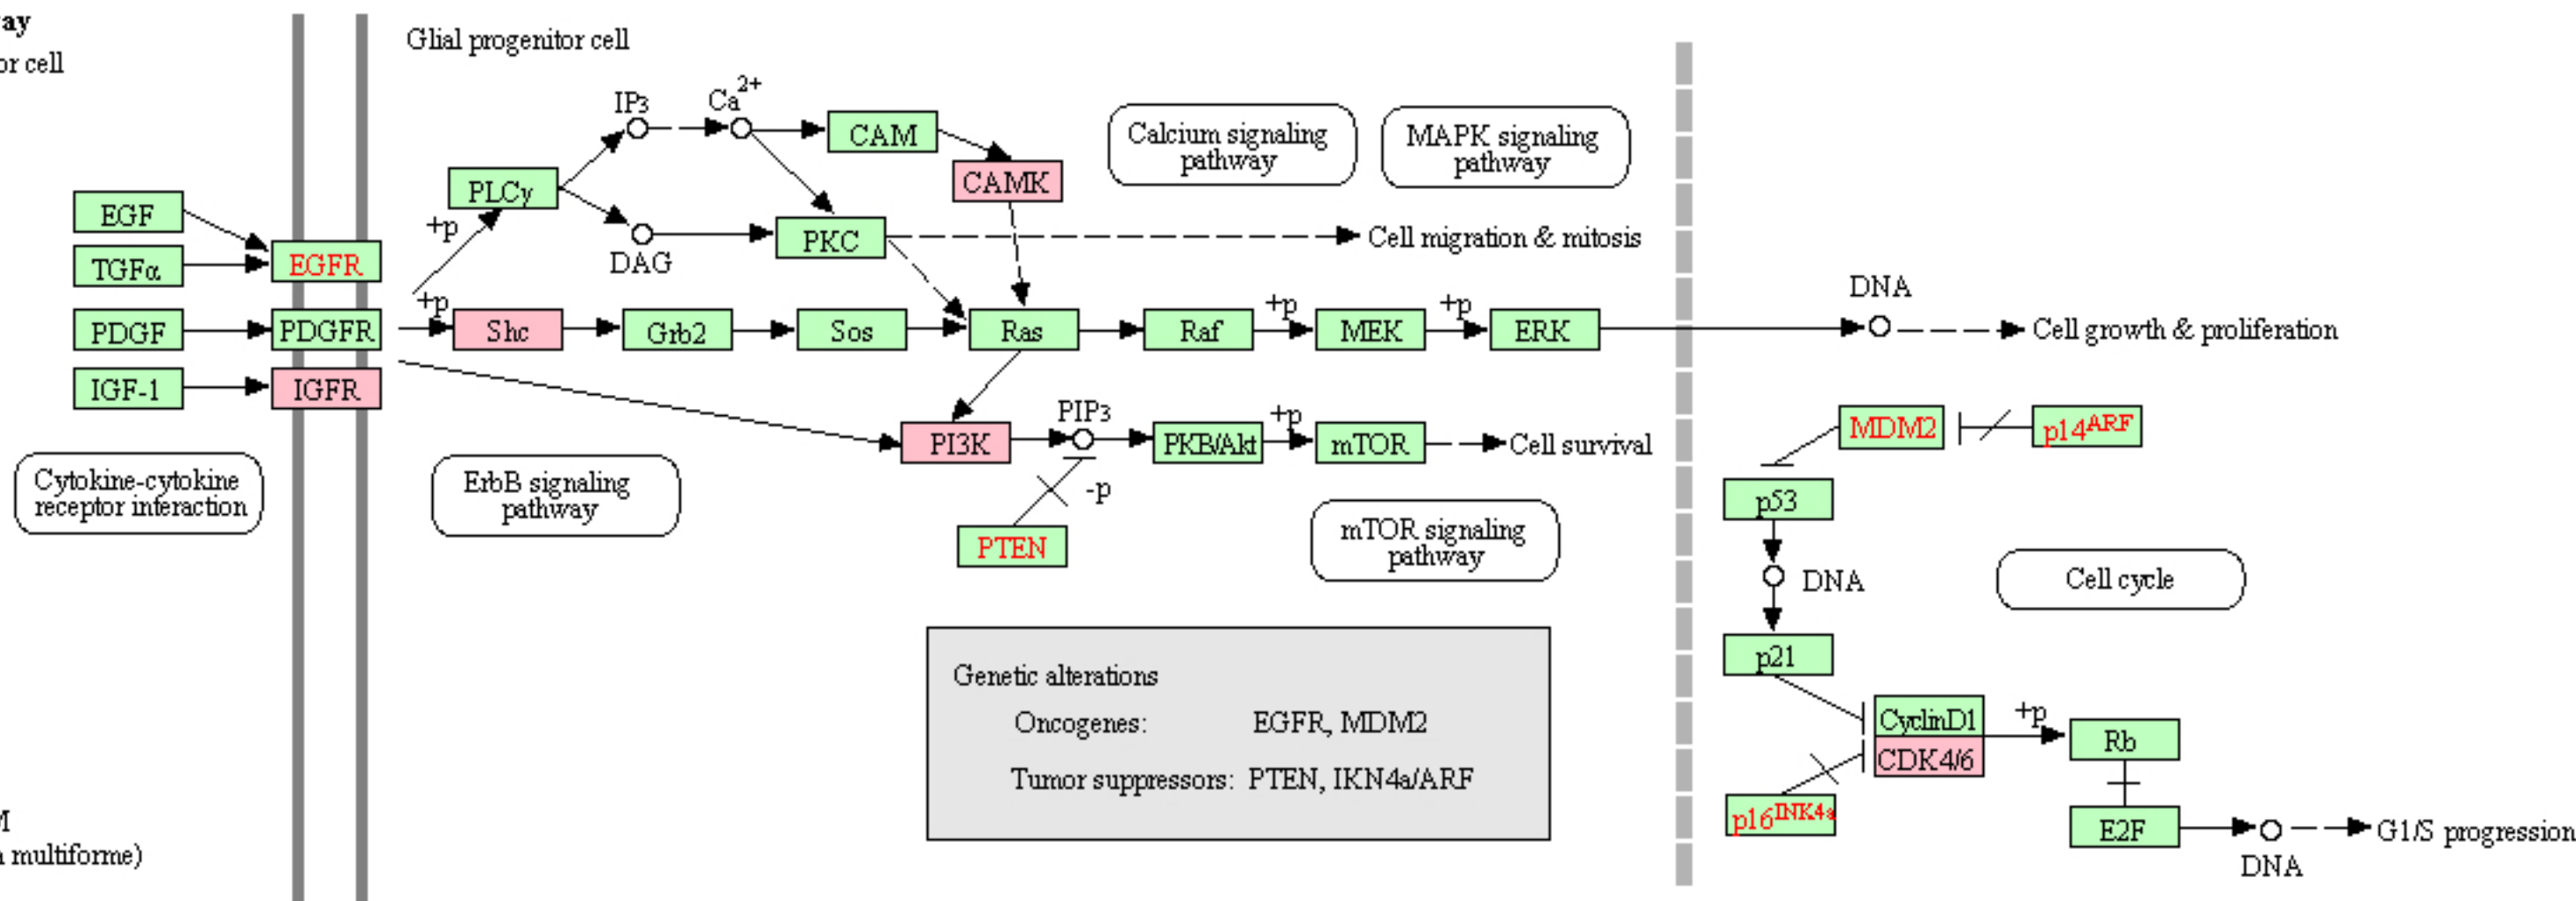

## Secondary pathway

Glial progenitor cell

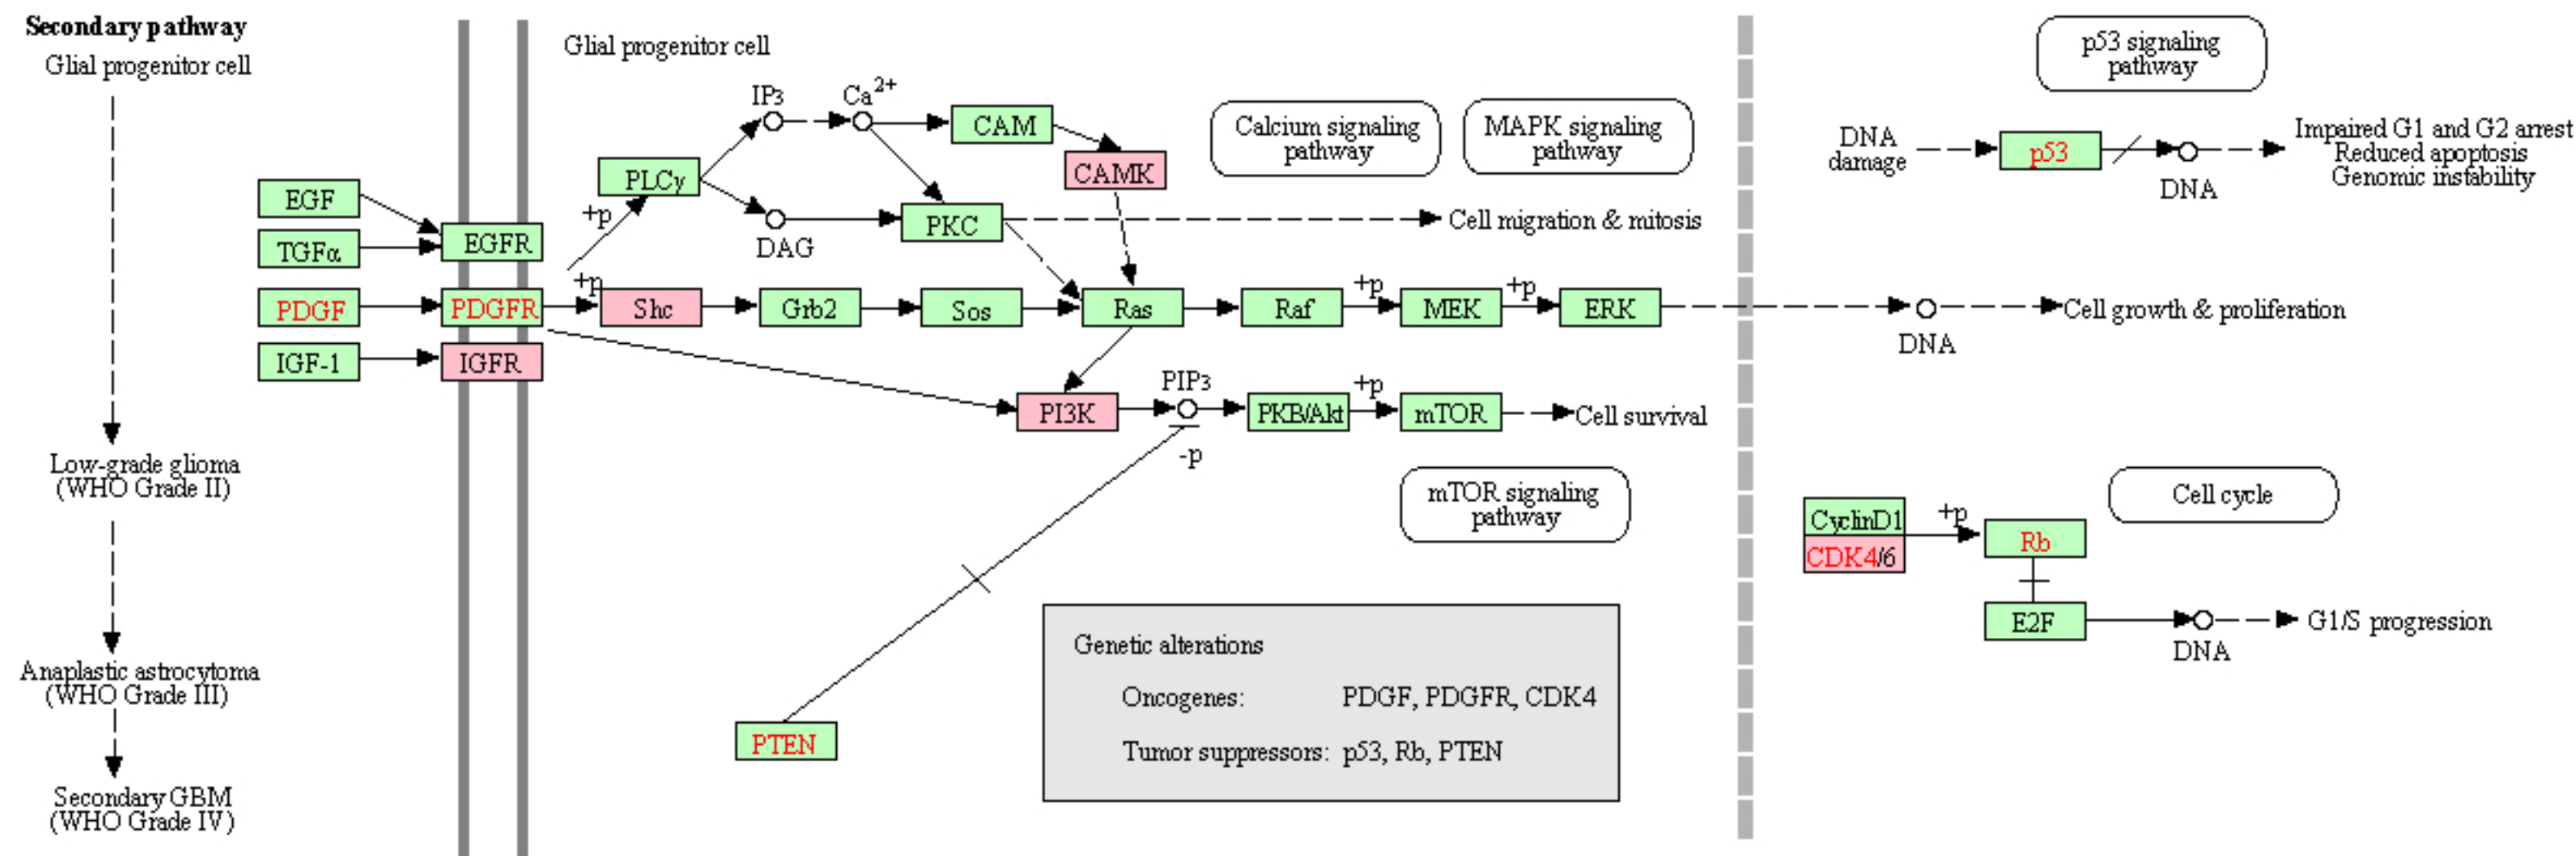

# Bladder Cancer

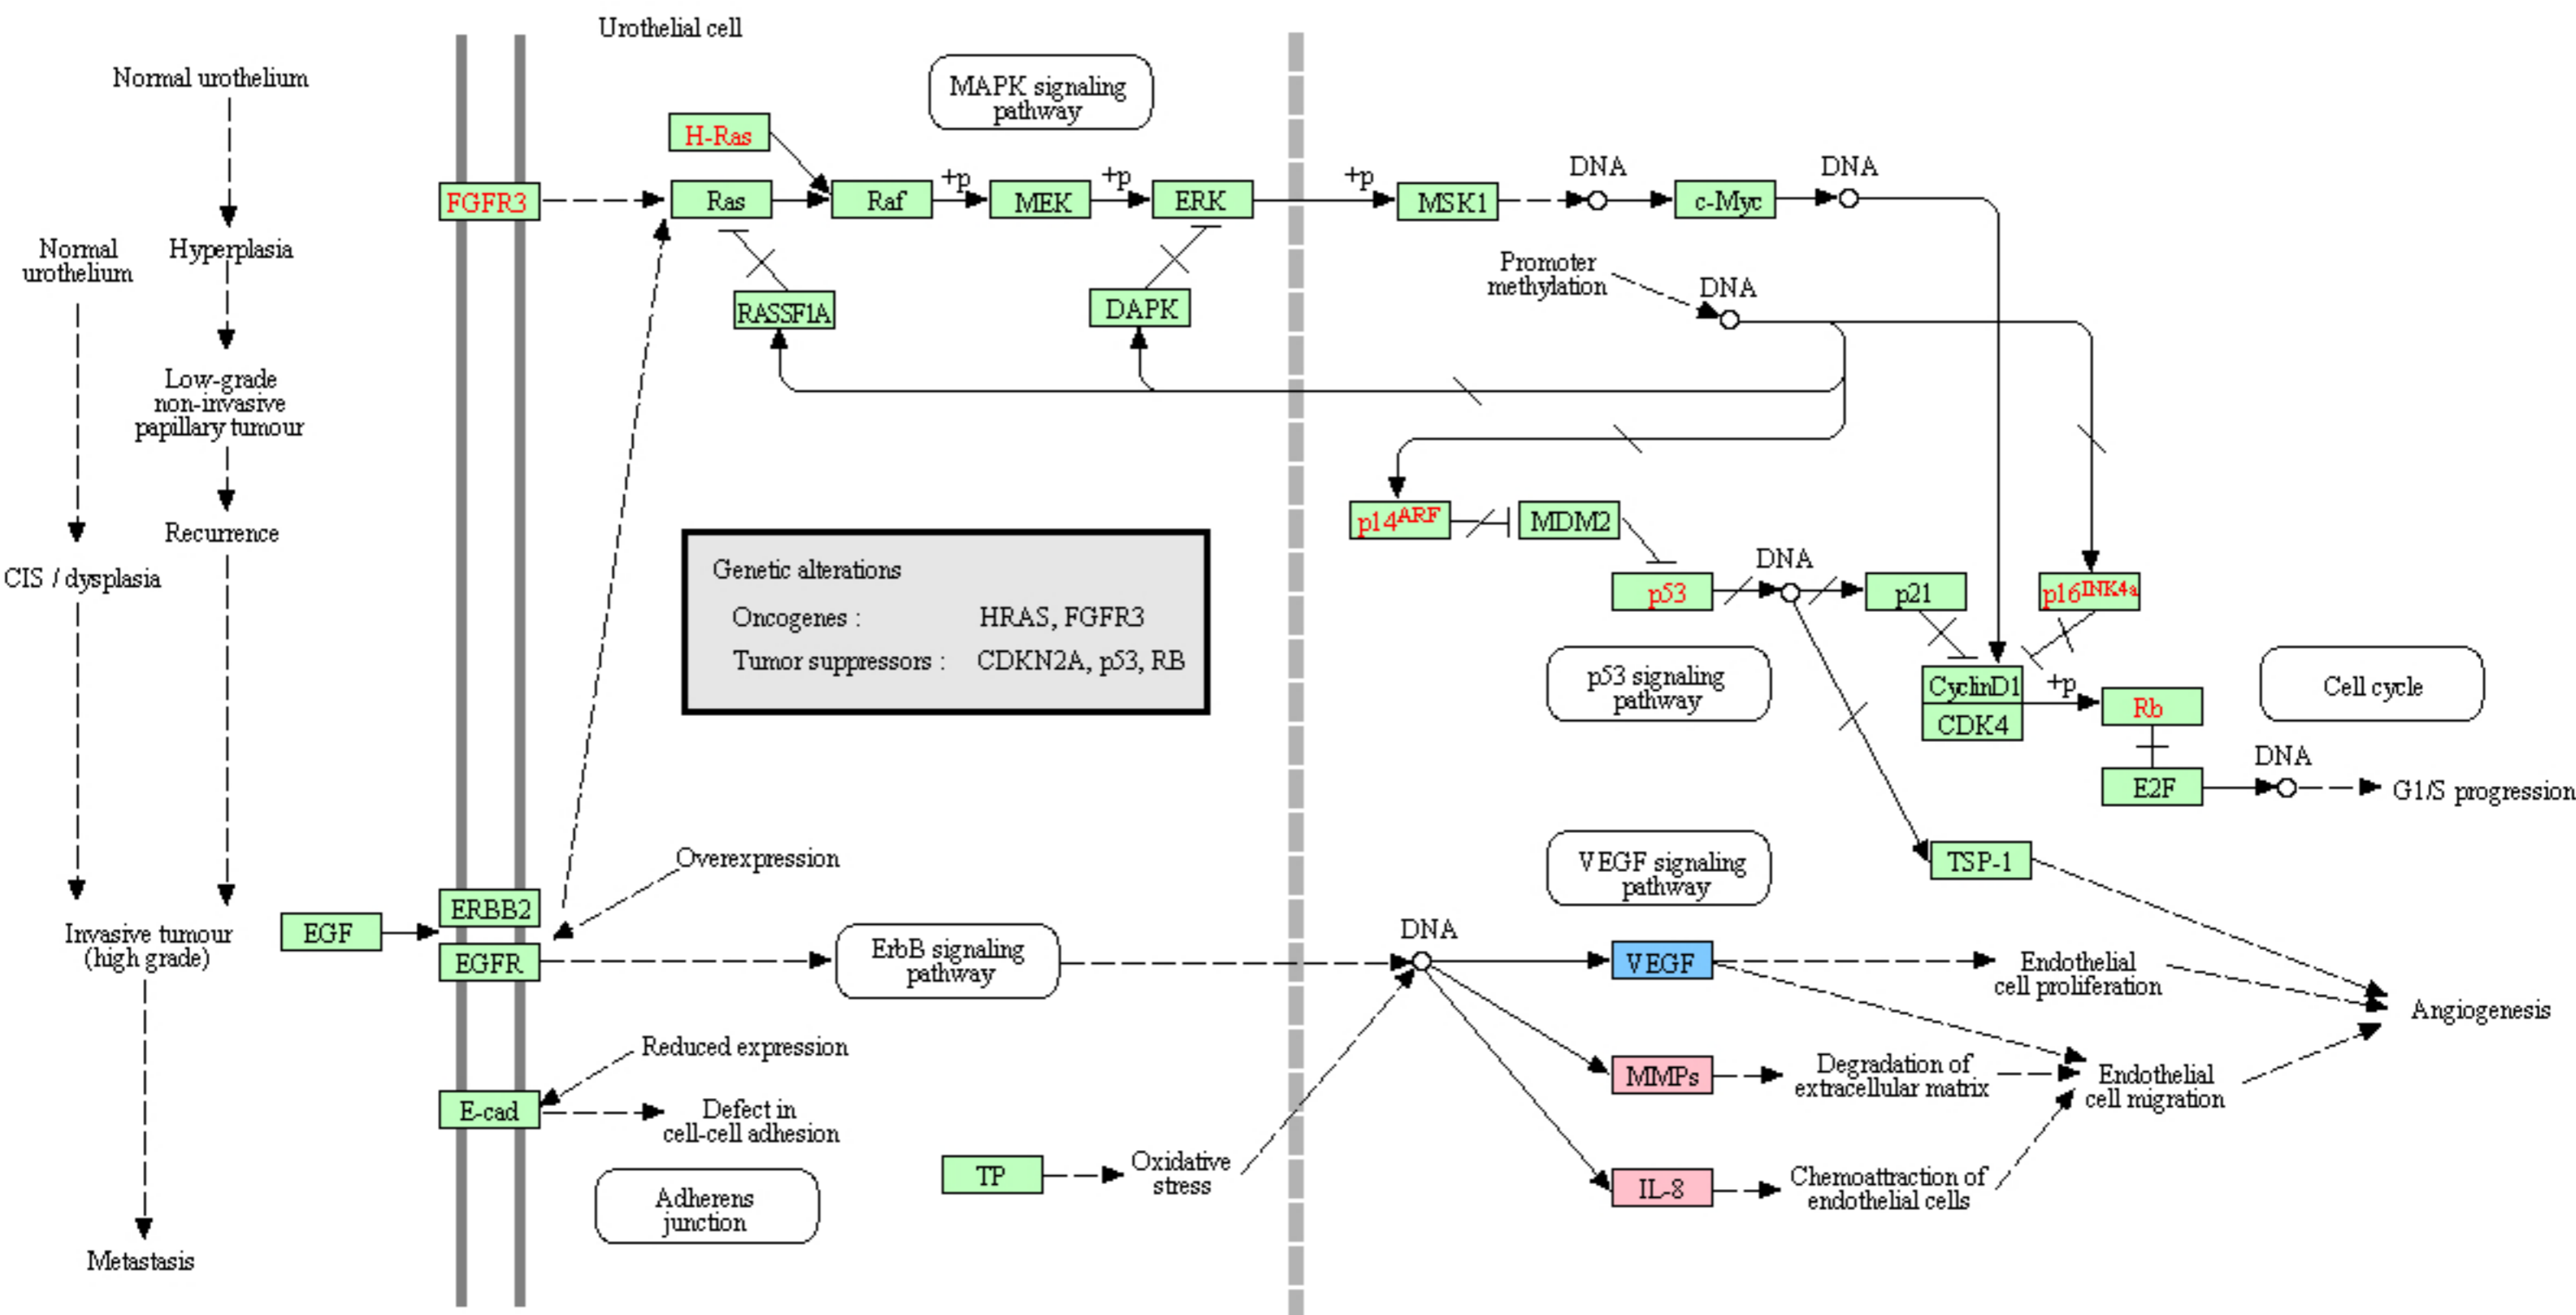

# Small Cell Lung Cancer

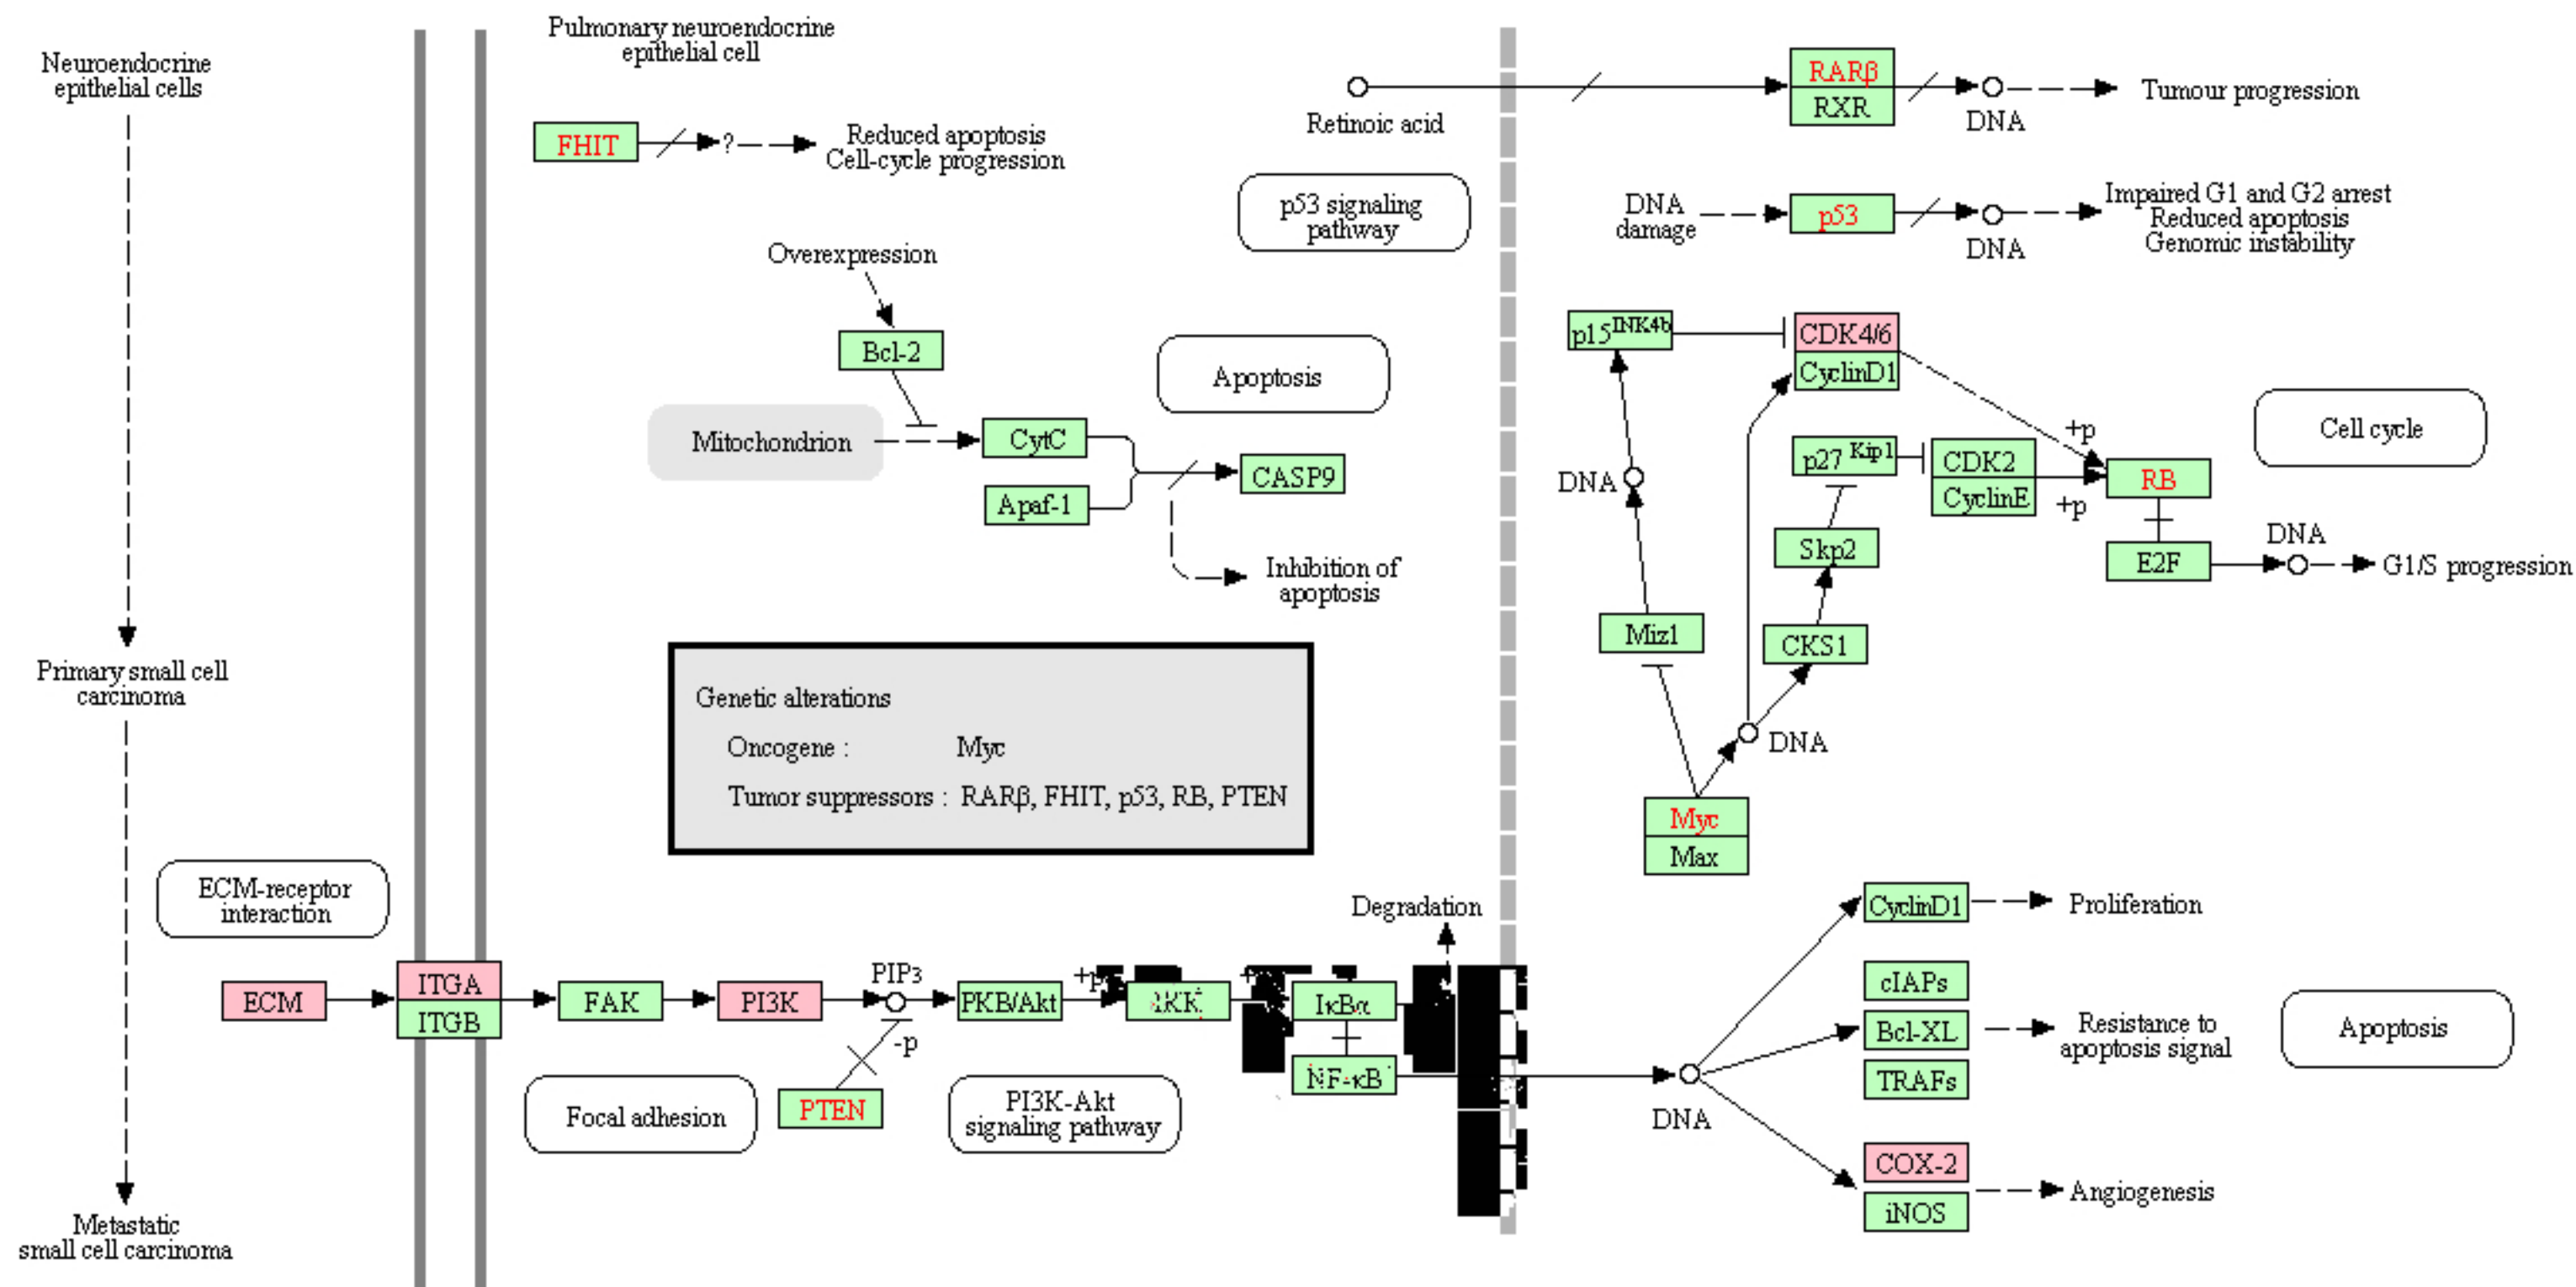

# Chronic Myeloid Leukemia

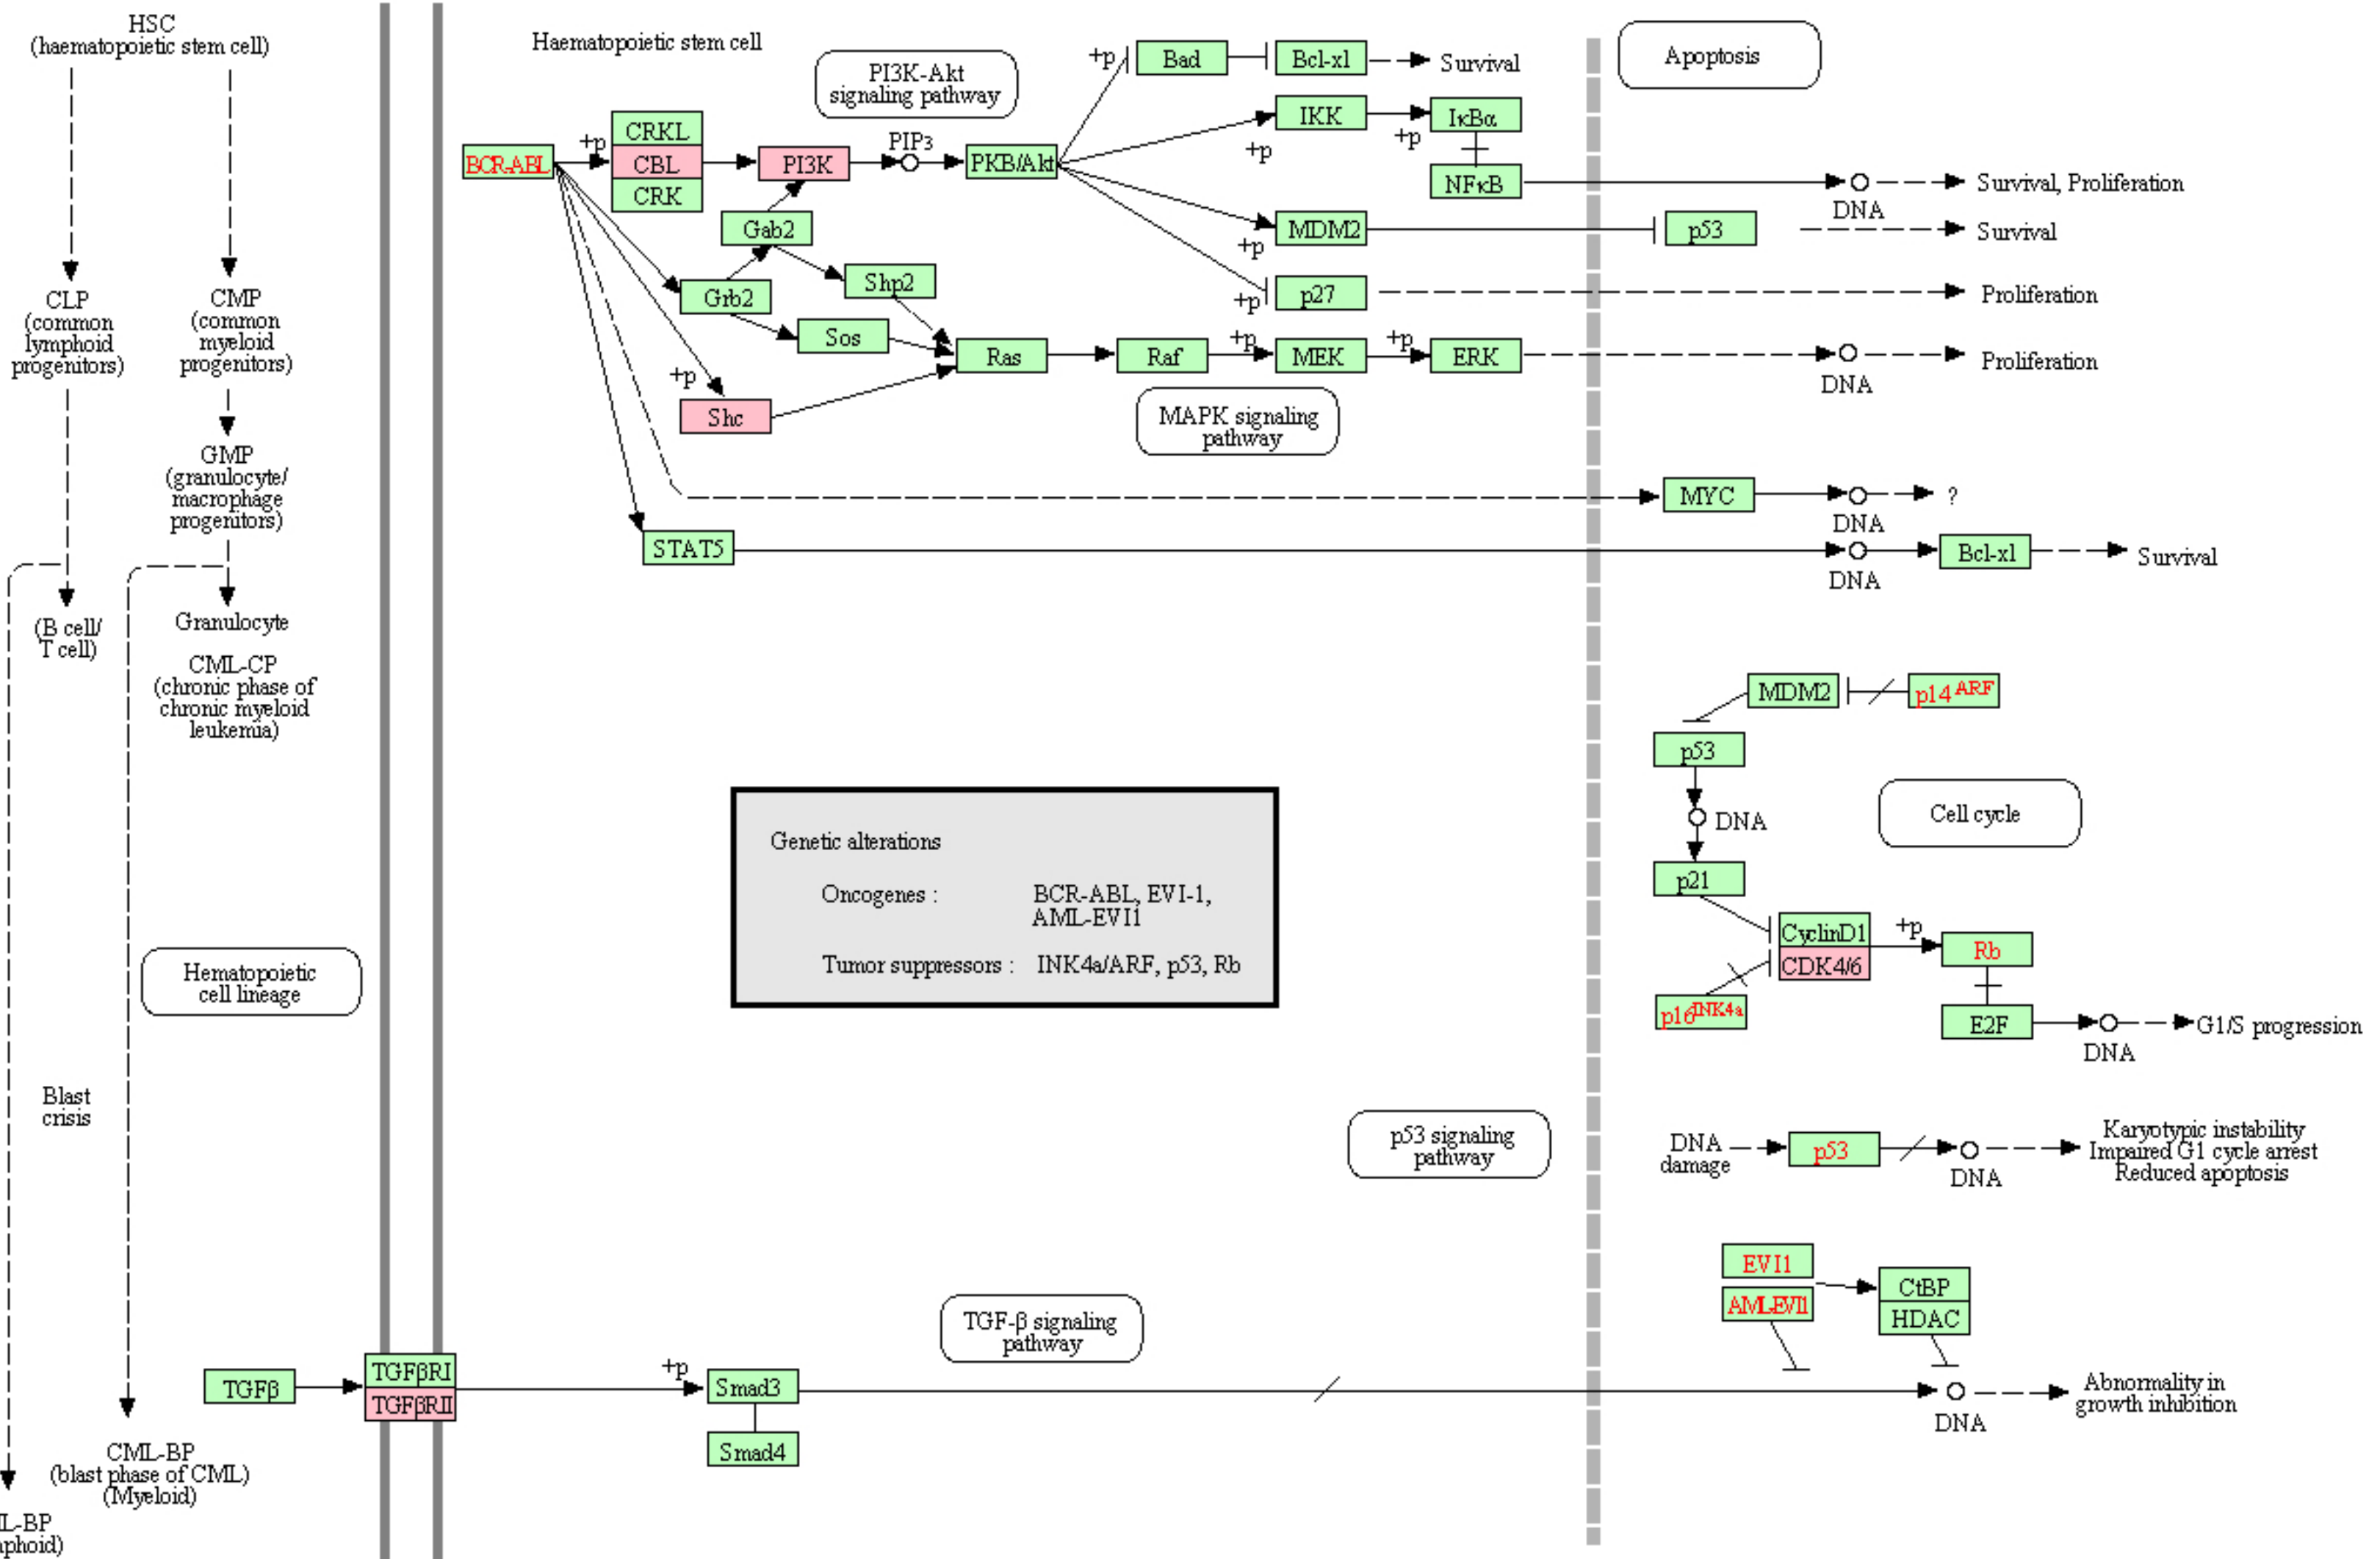

# Endocytosis

## Clathrin-dependent endocytosis

## Clathrin-independent endocytosis

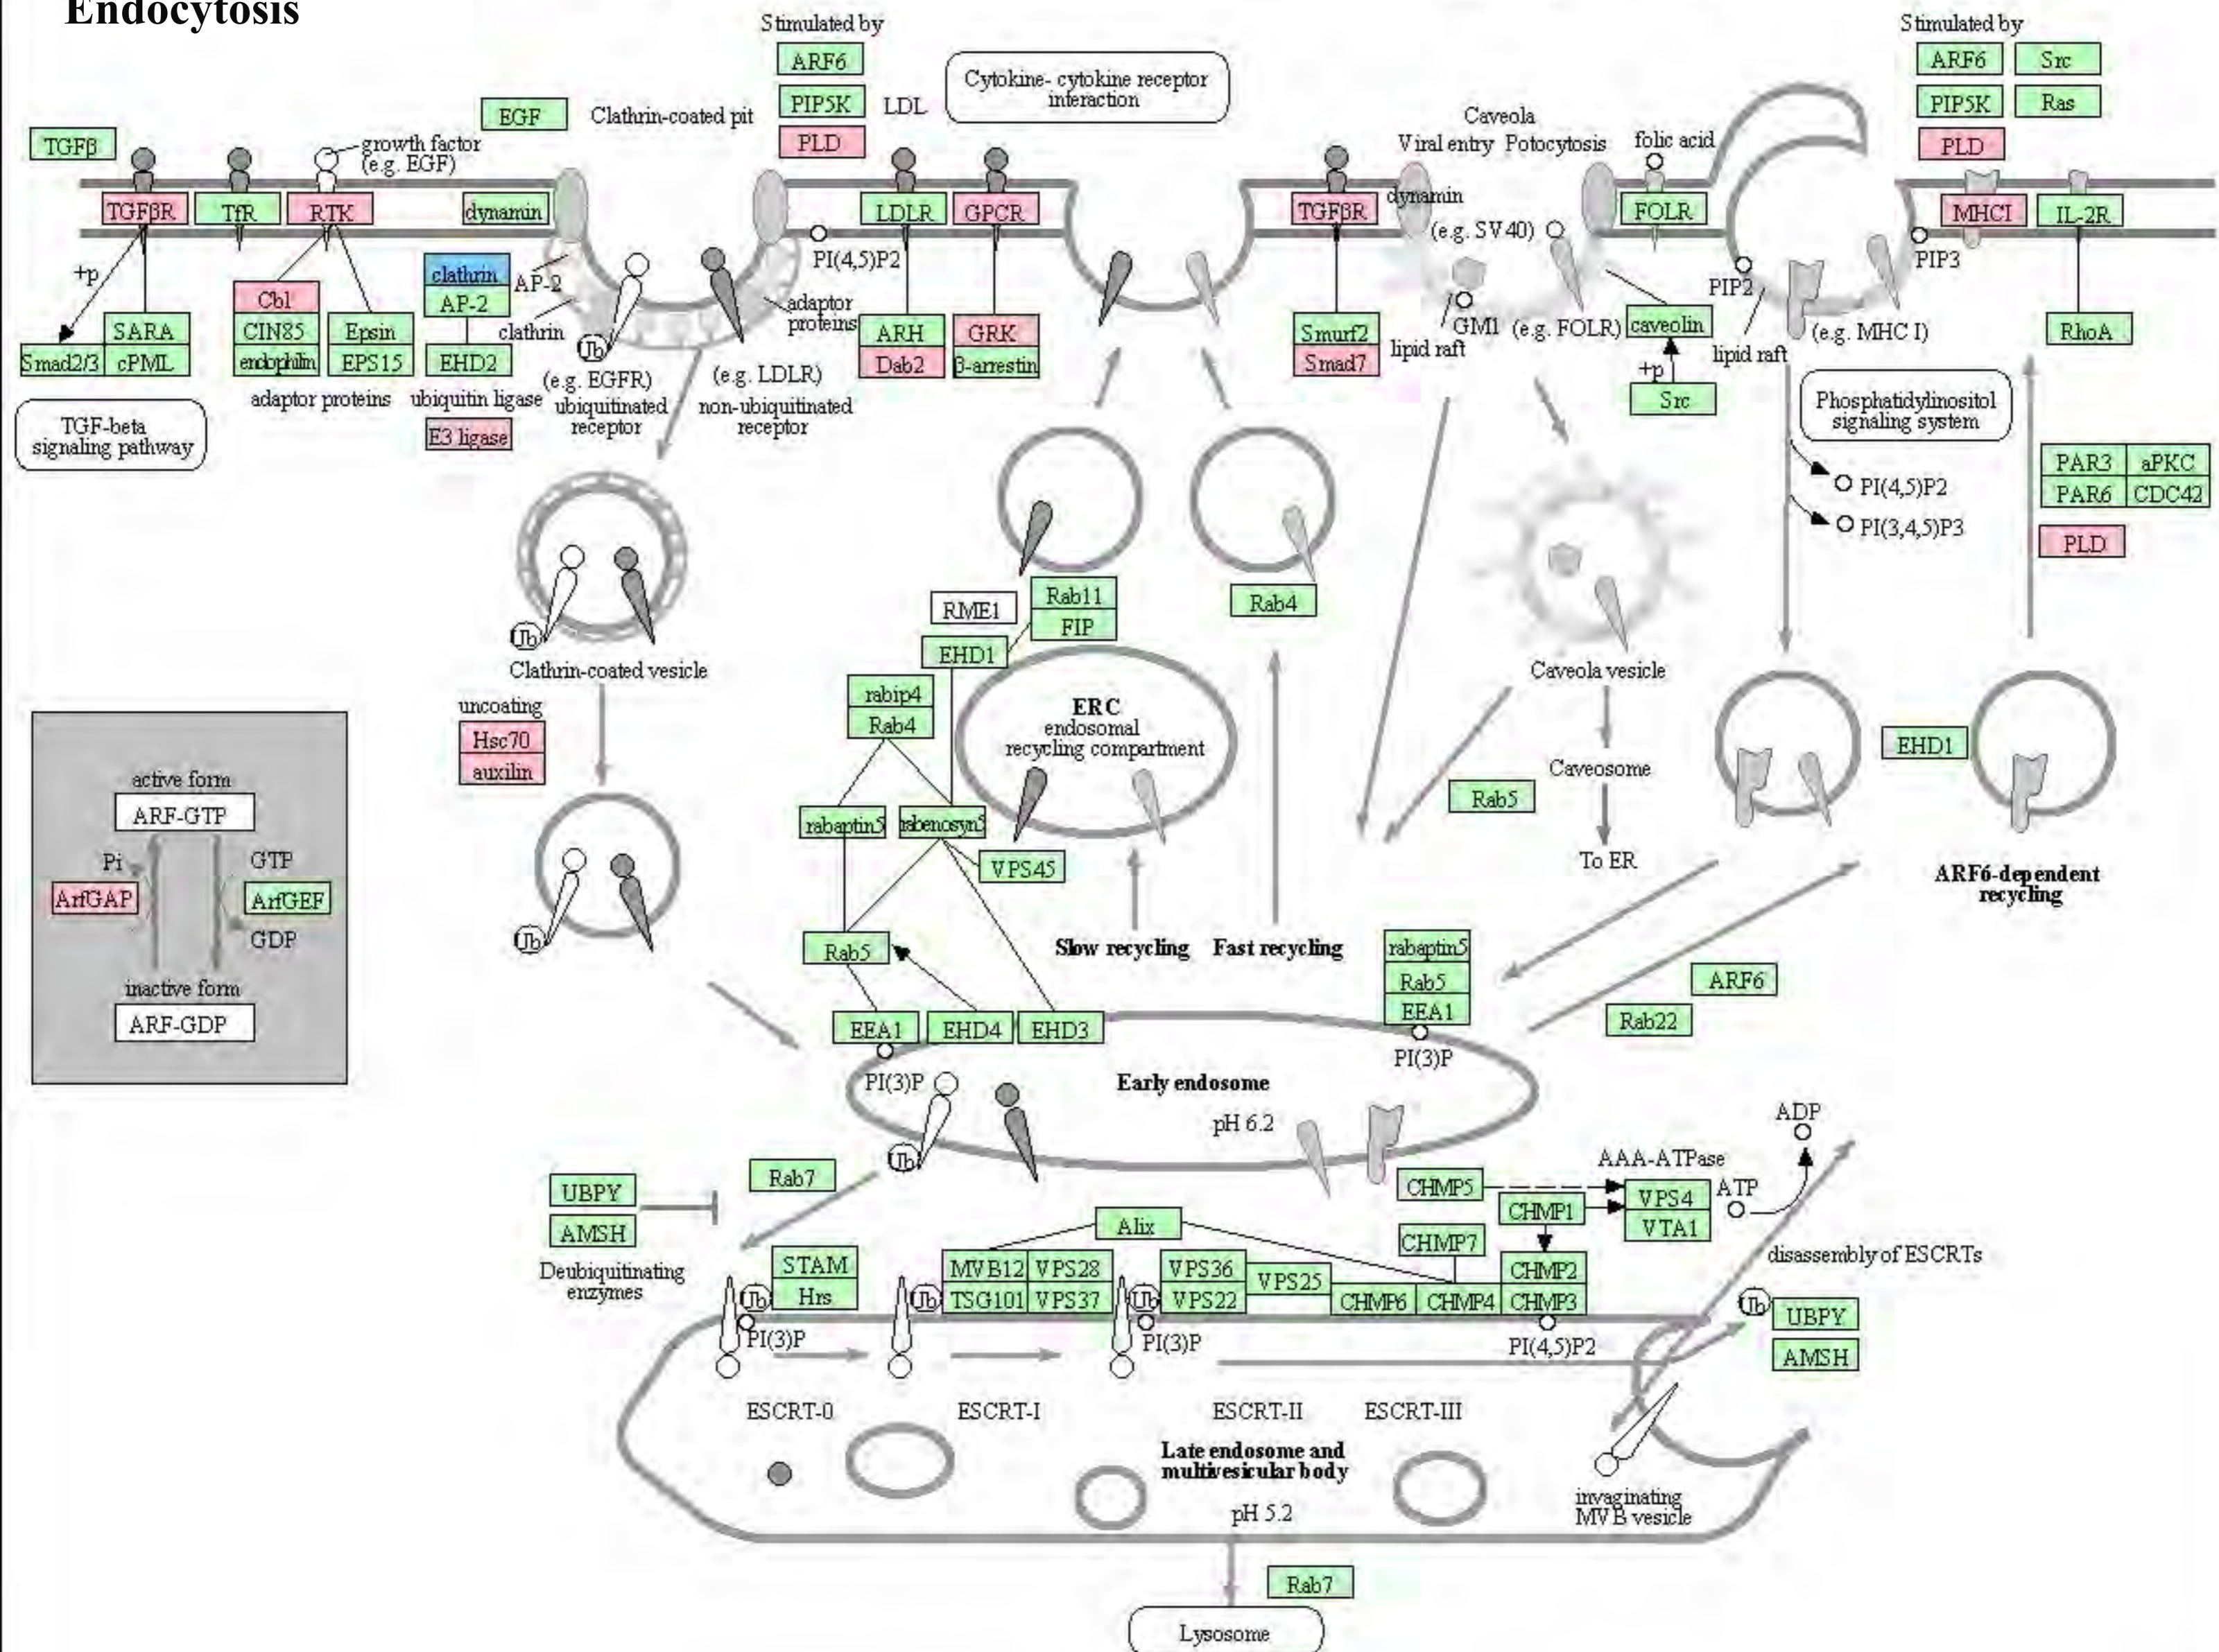

# Osteoclast Differentiation

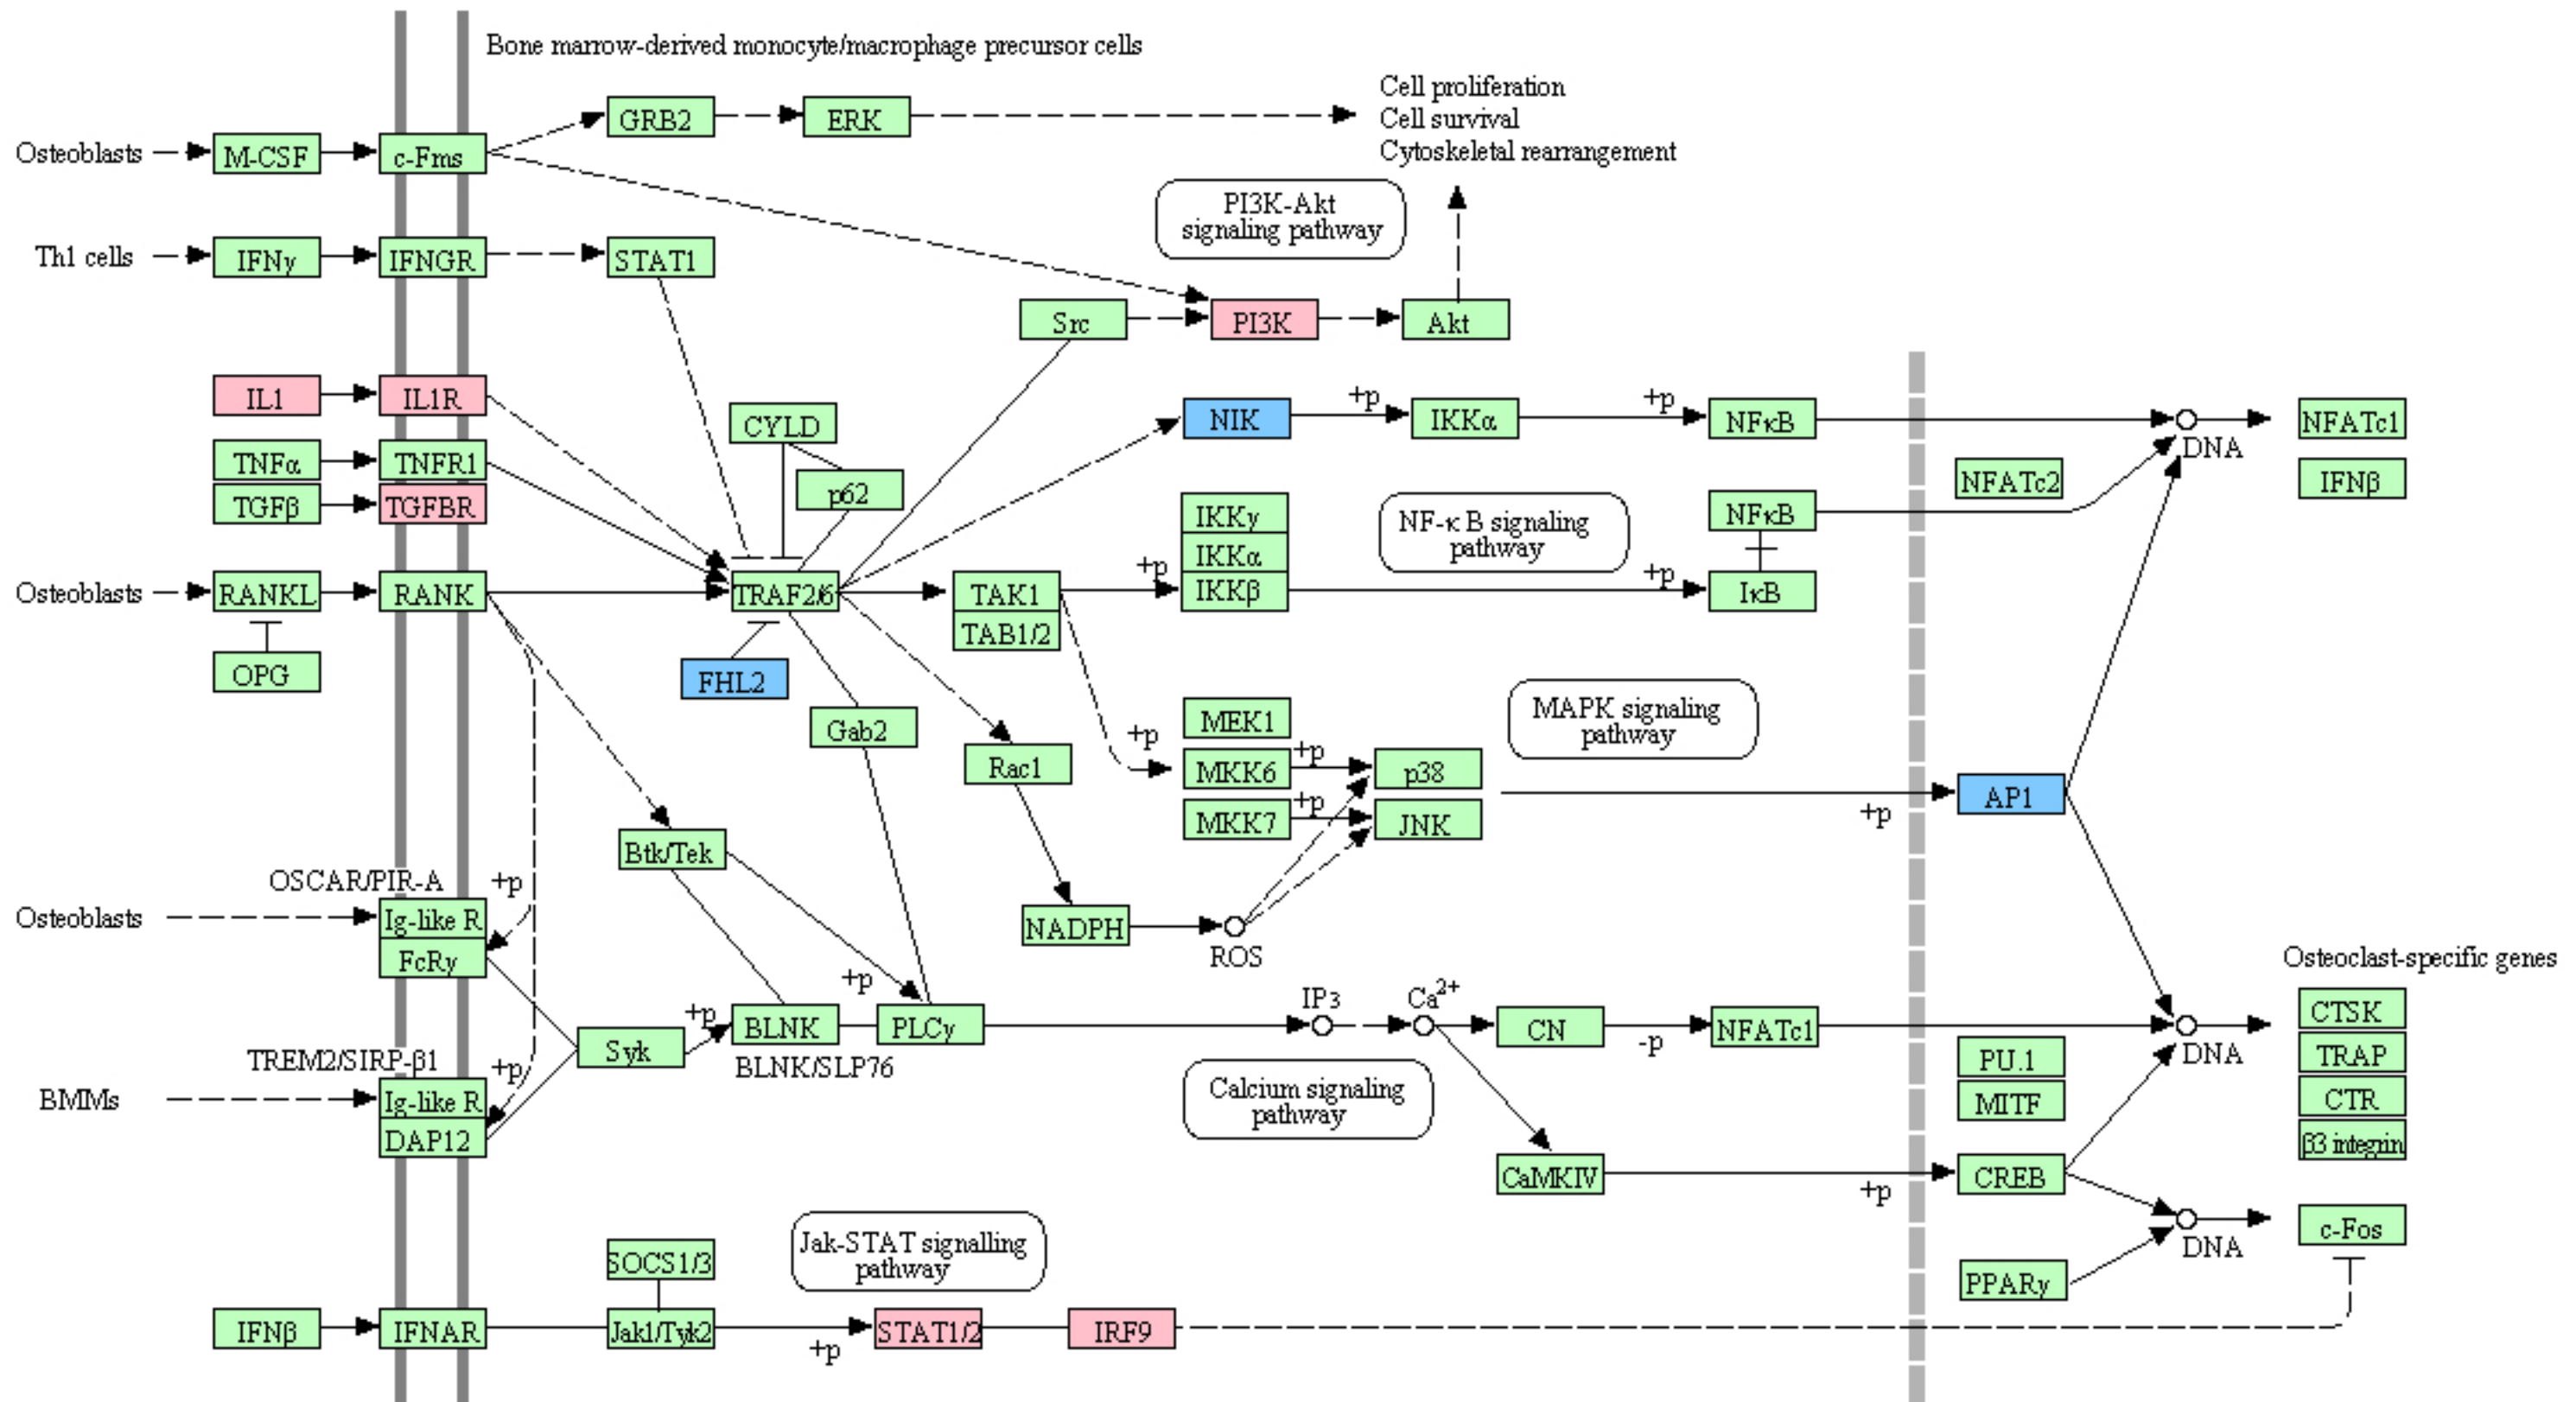

# Focal Adhesion

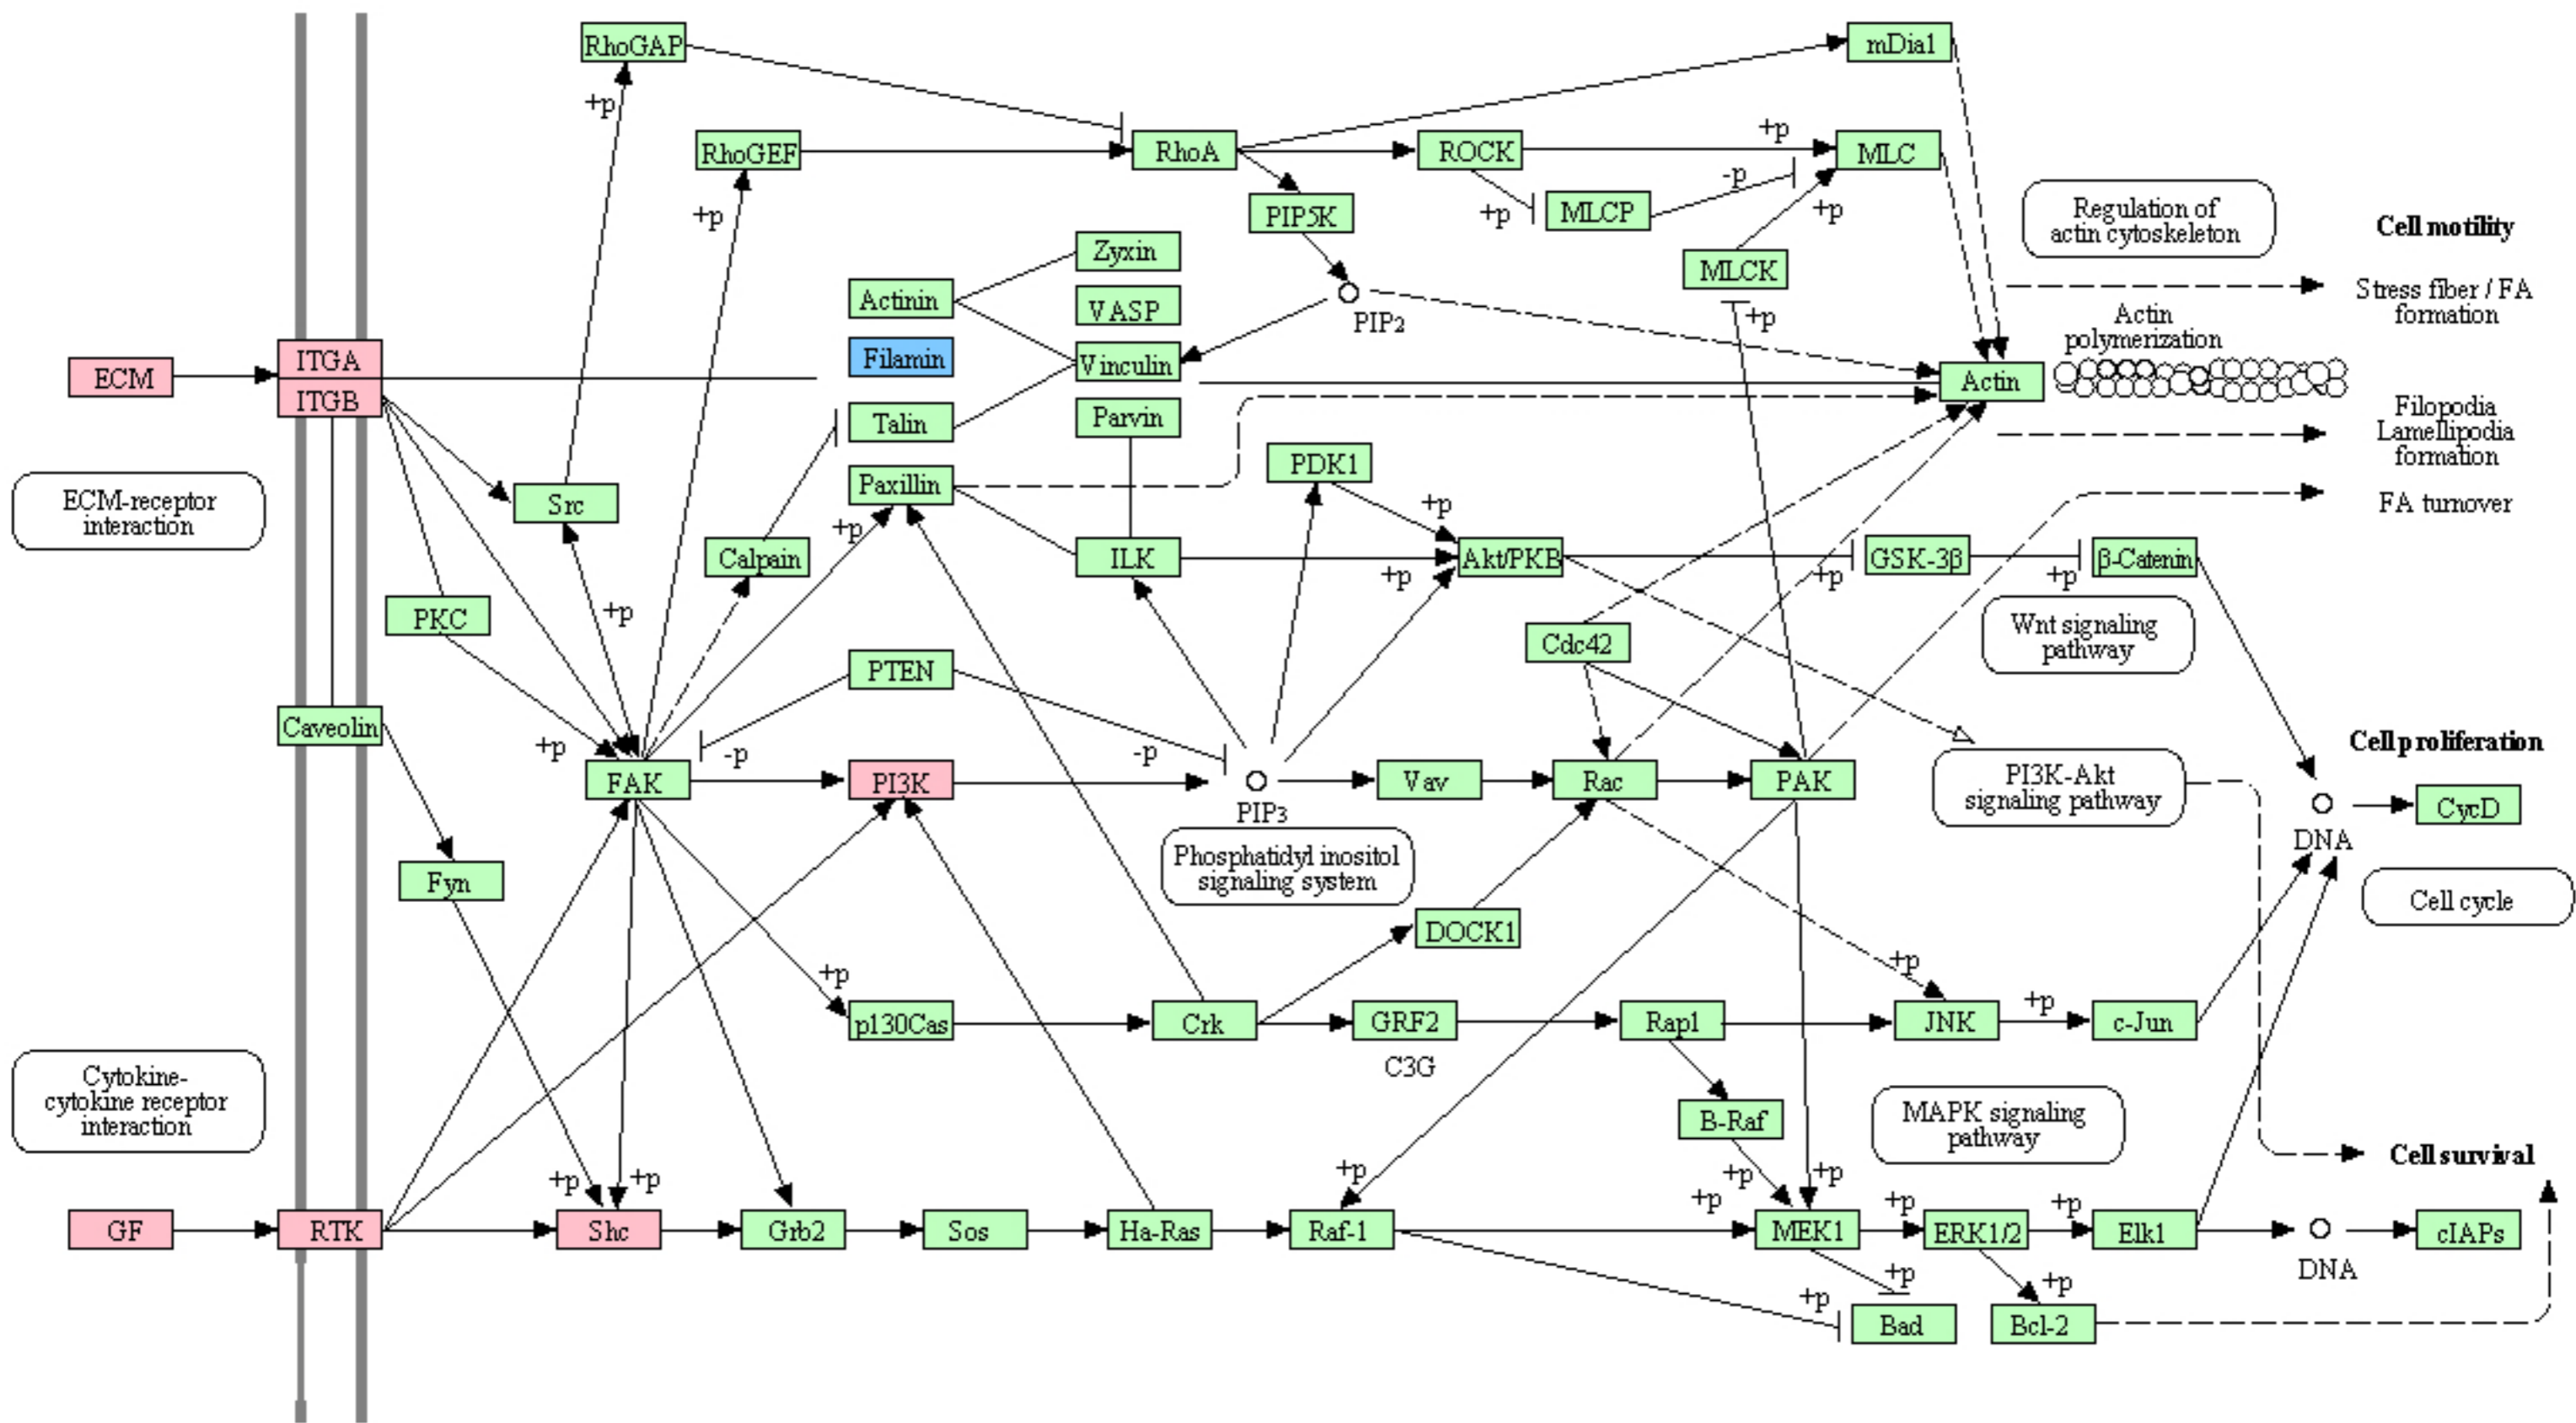

# ECM-Receptor Interaction

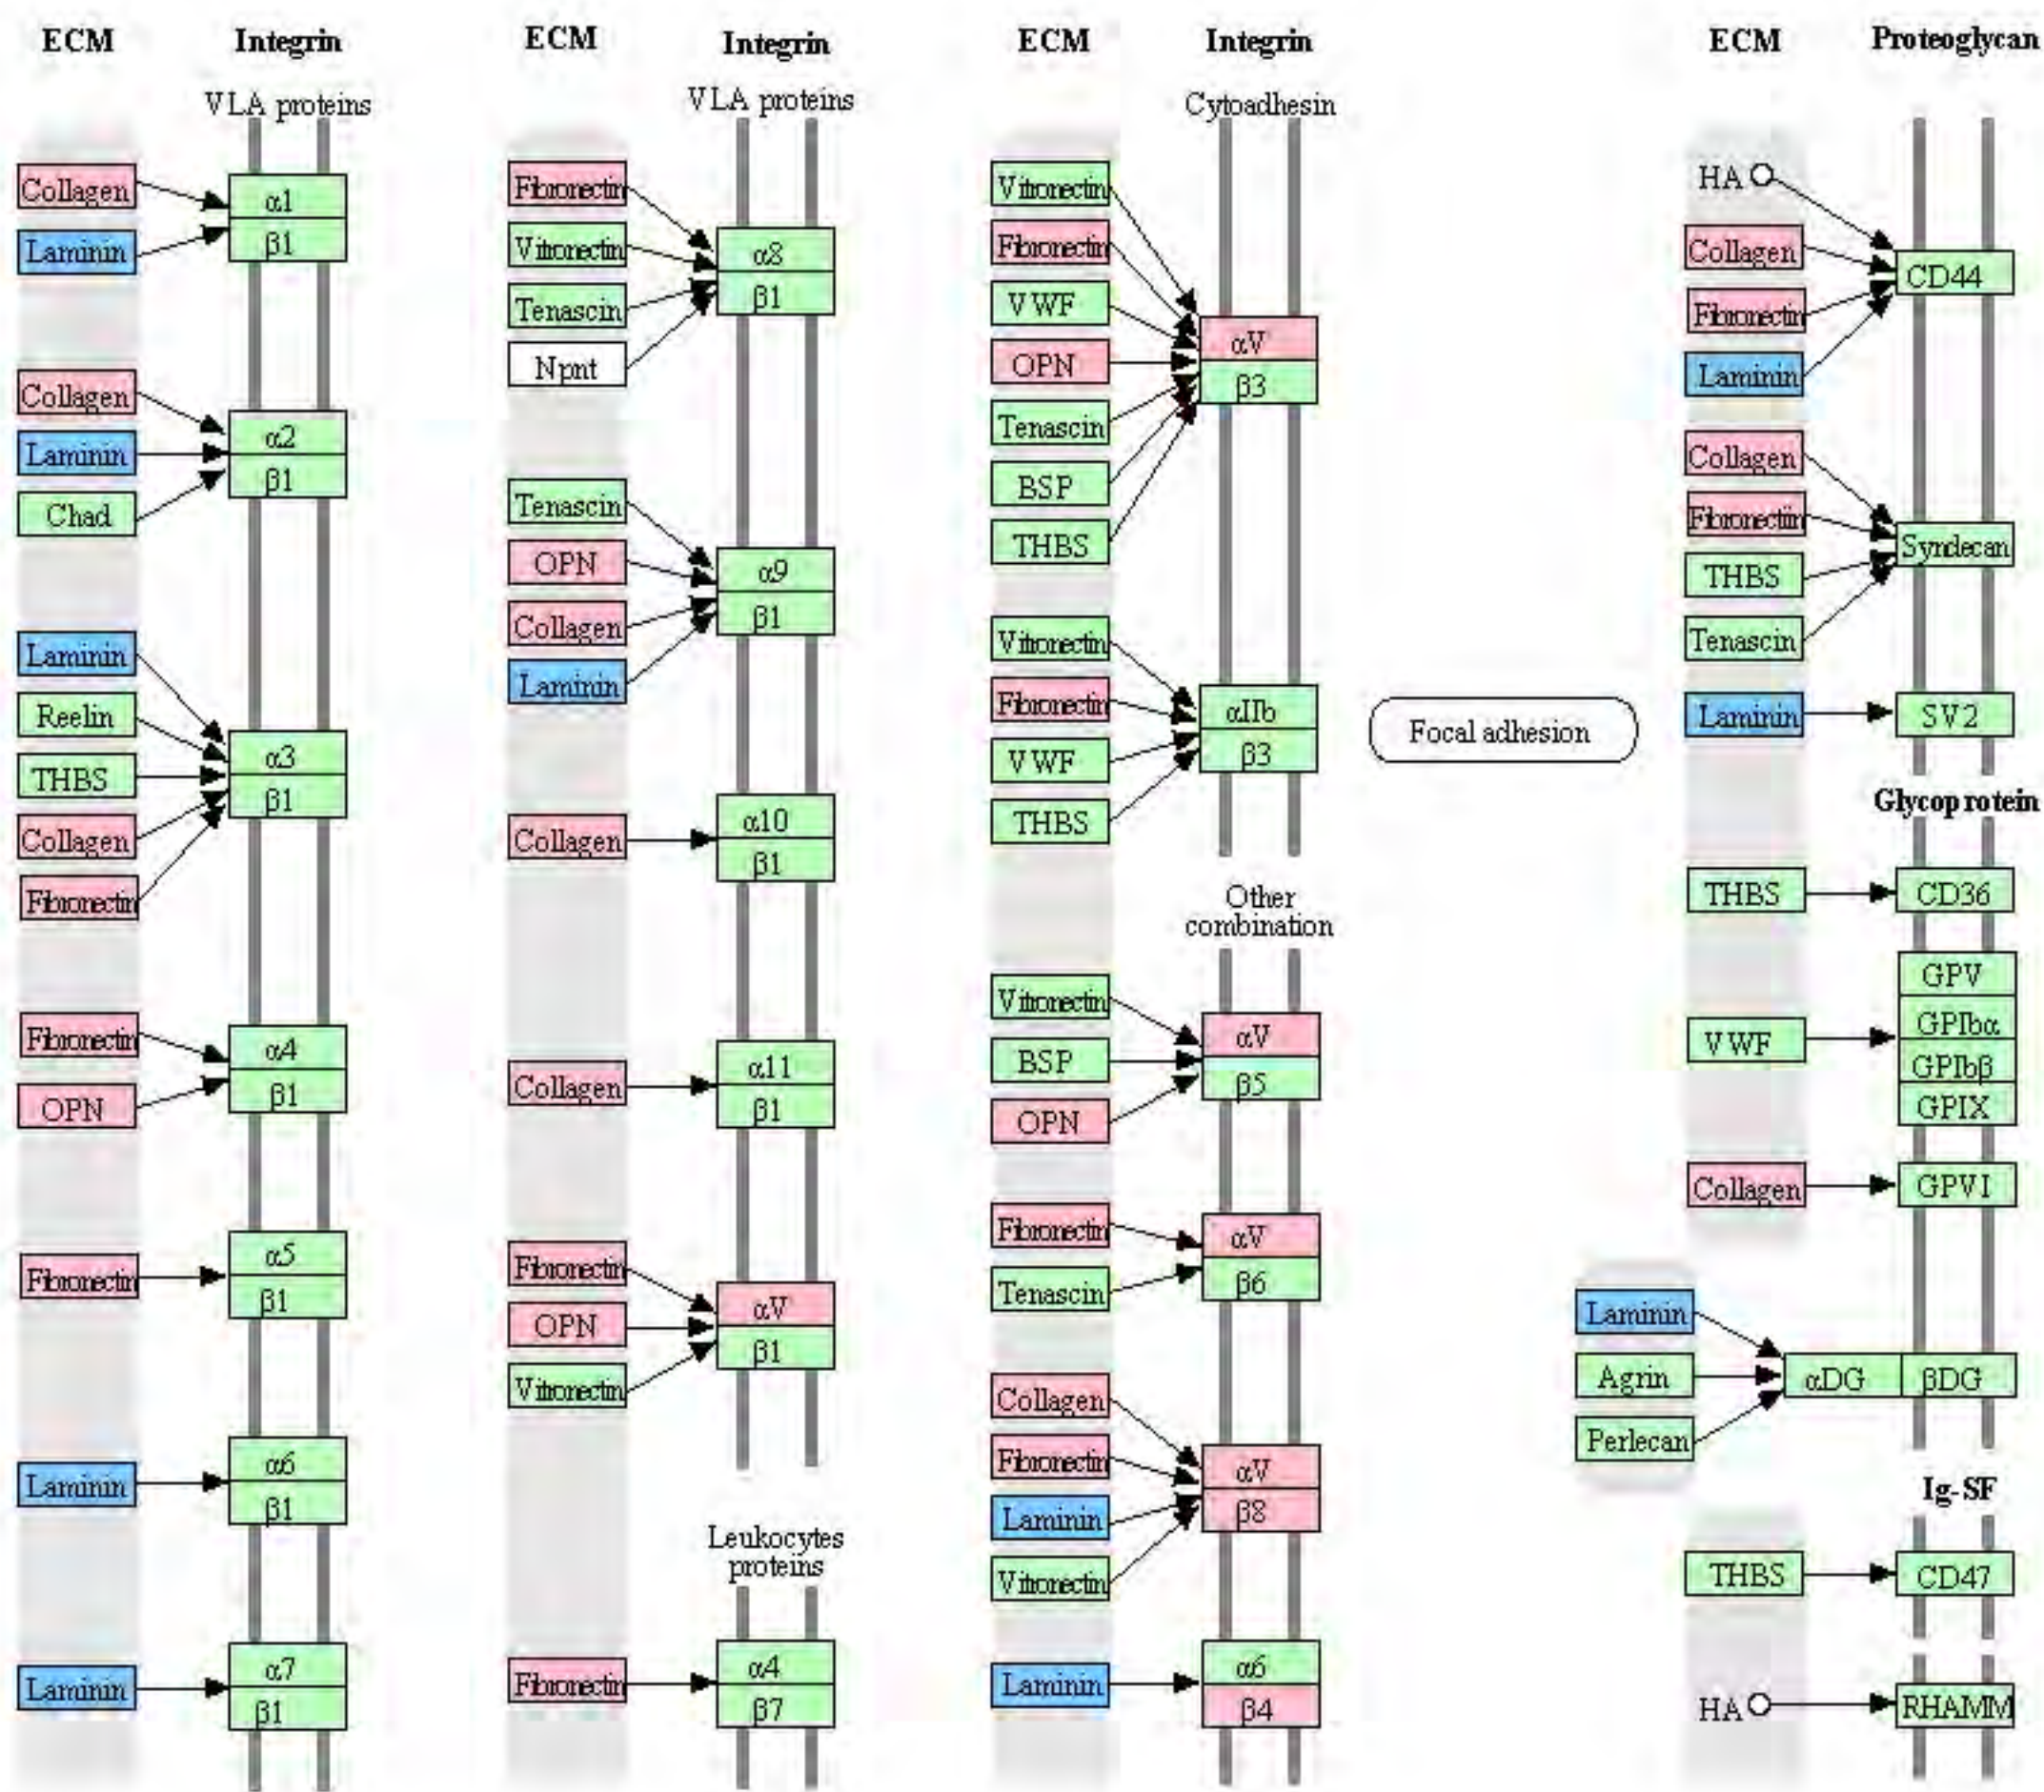

Cell Adhesion Molecules

IMMUNE SYSTEM

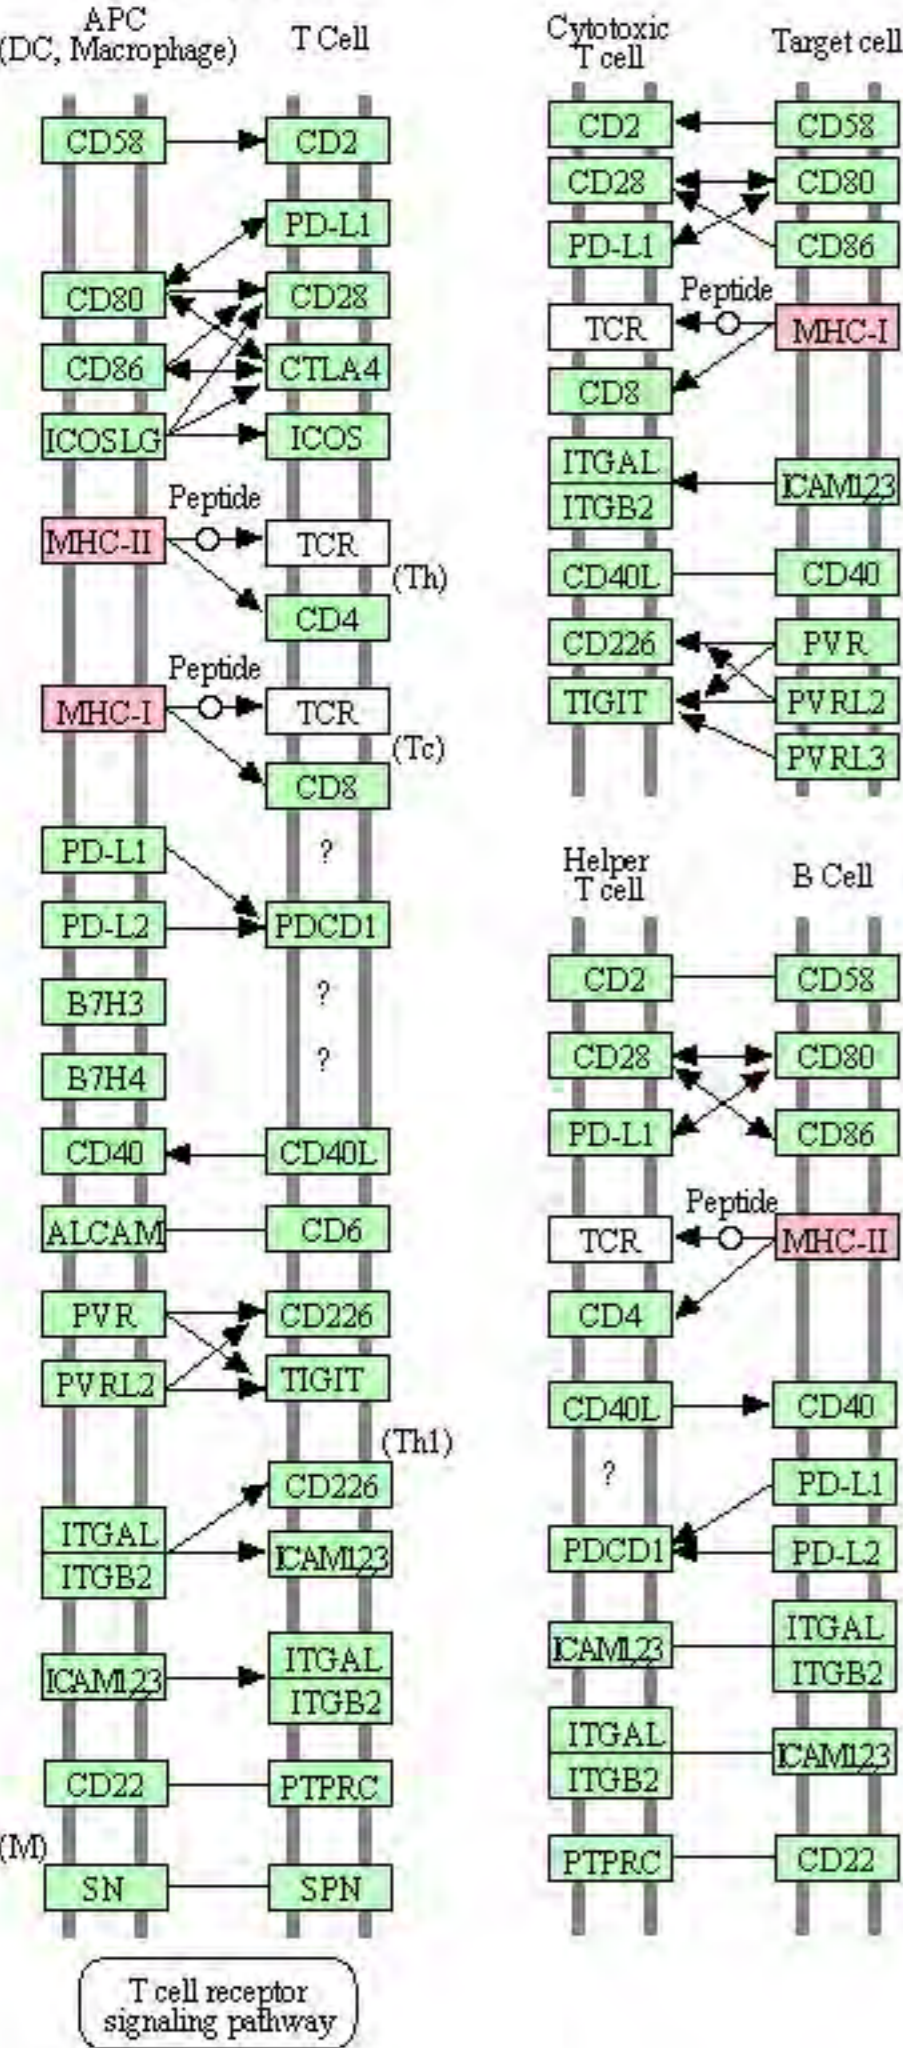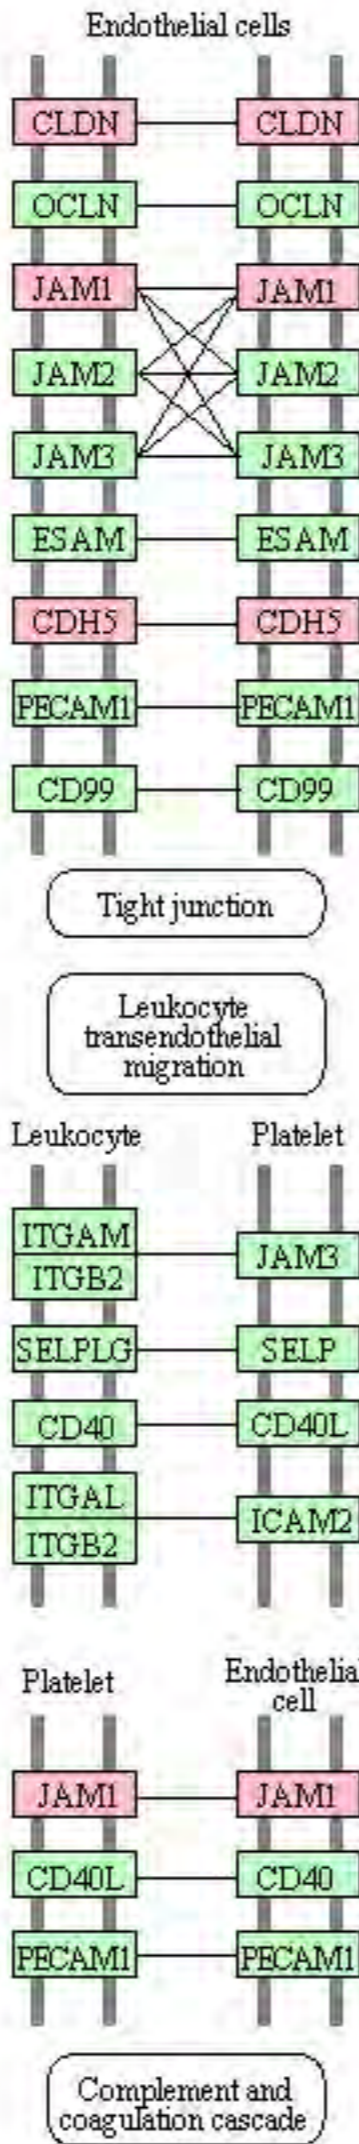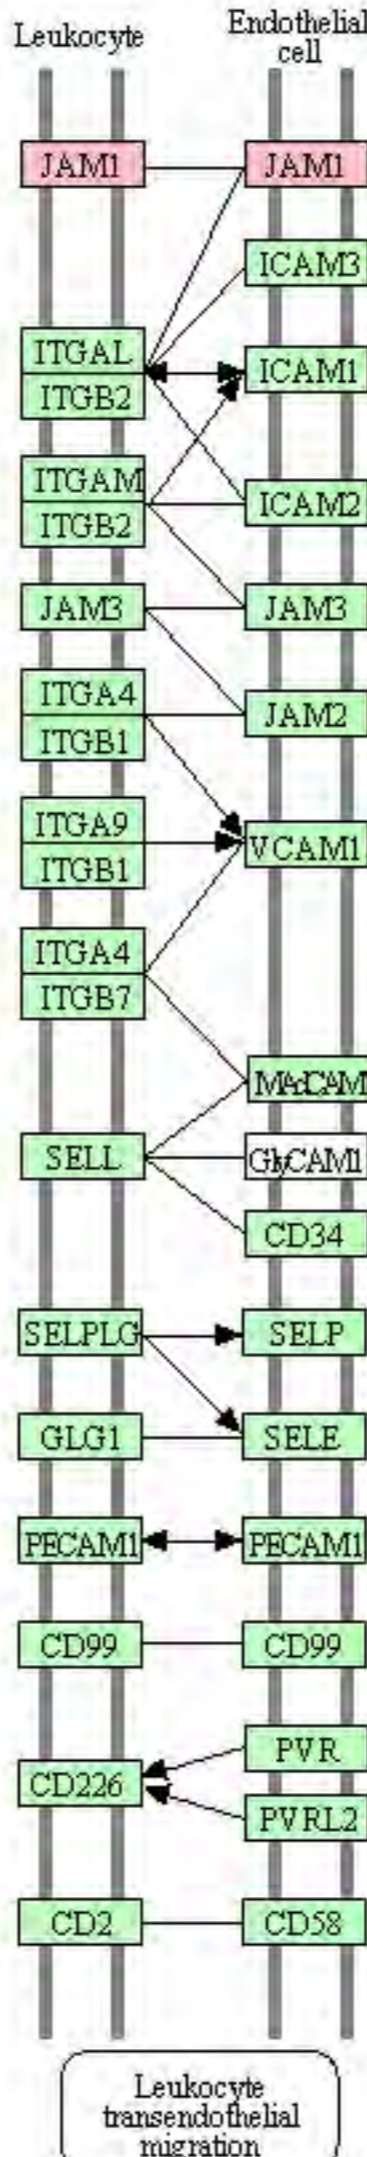

NEURAL SYSTEM

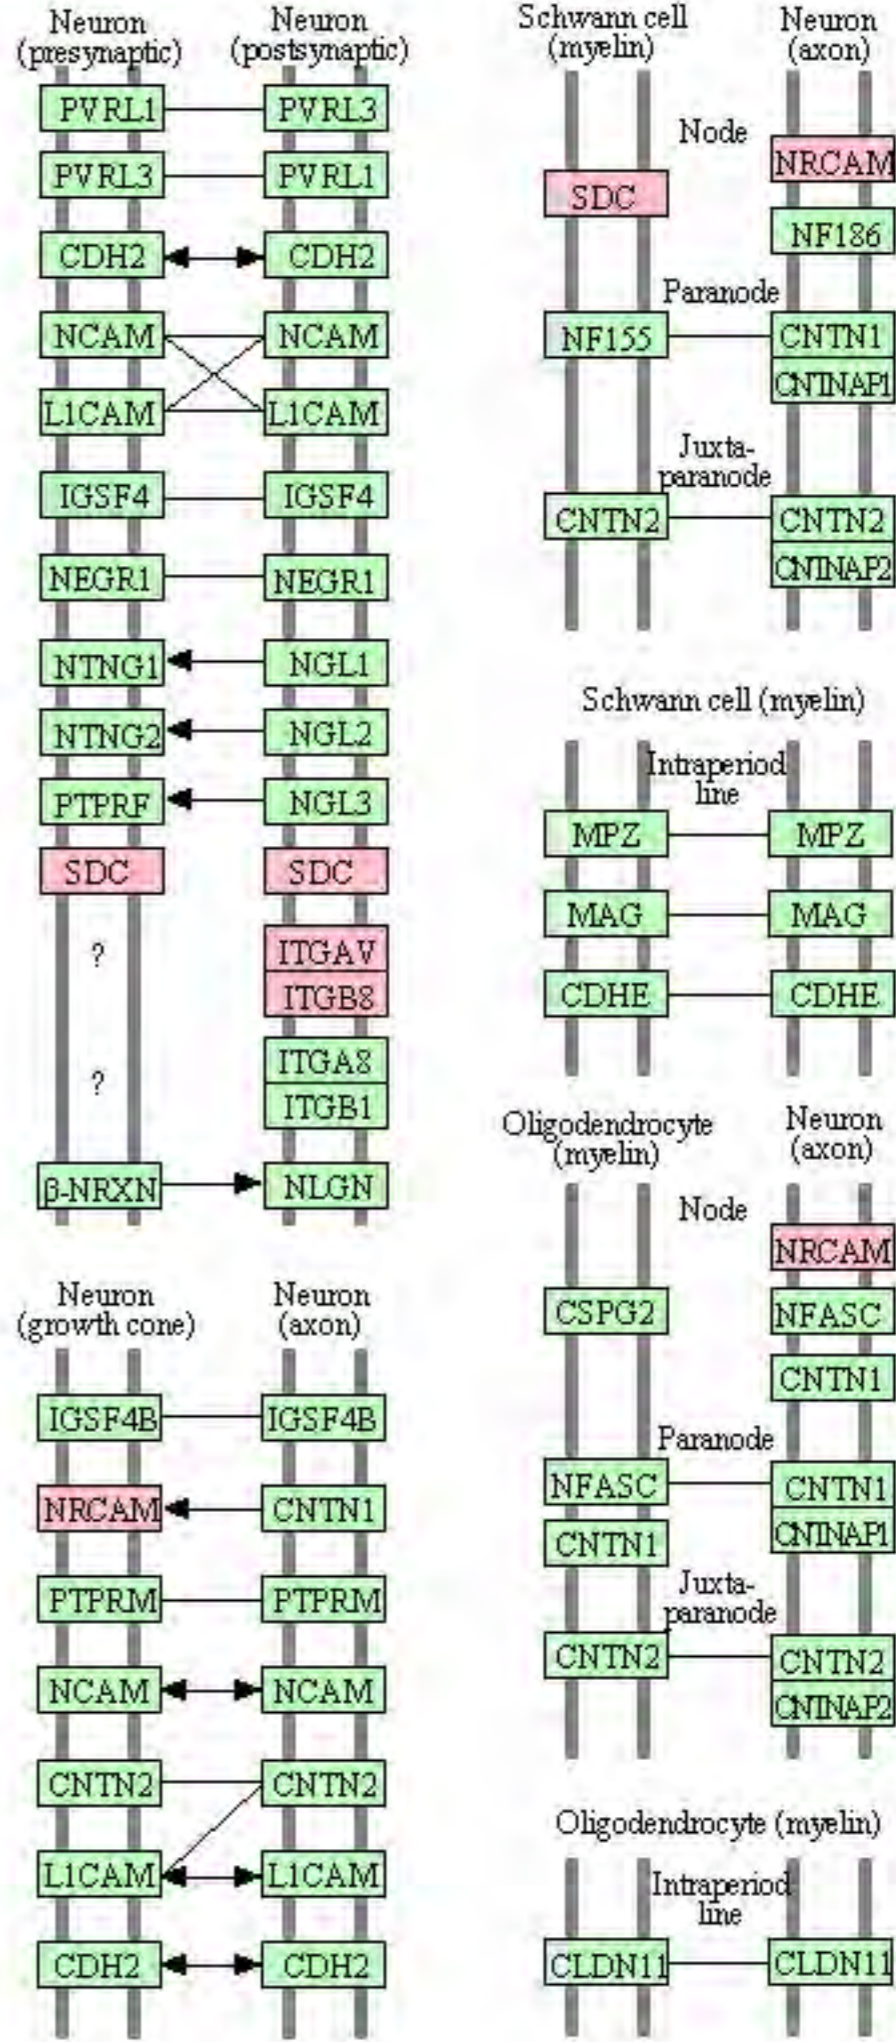

OTHER SYSTEMS

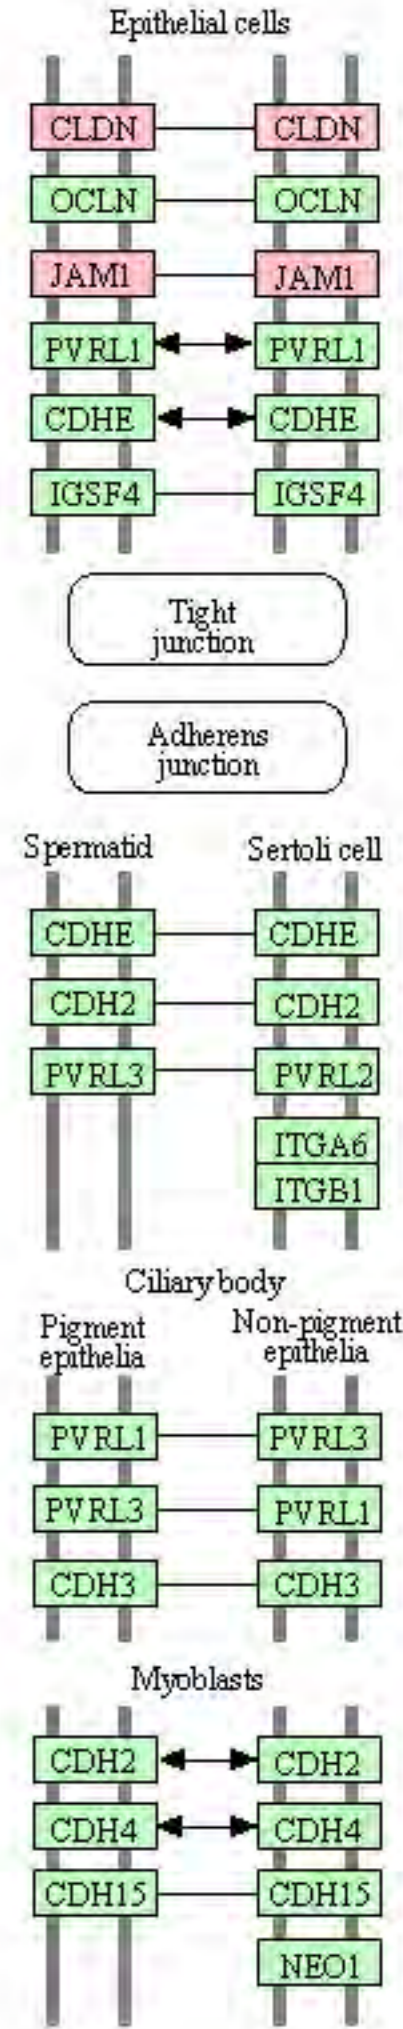

# Complement and Coagulation Cascades

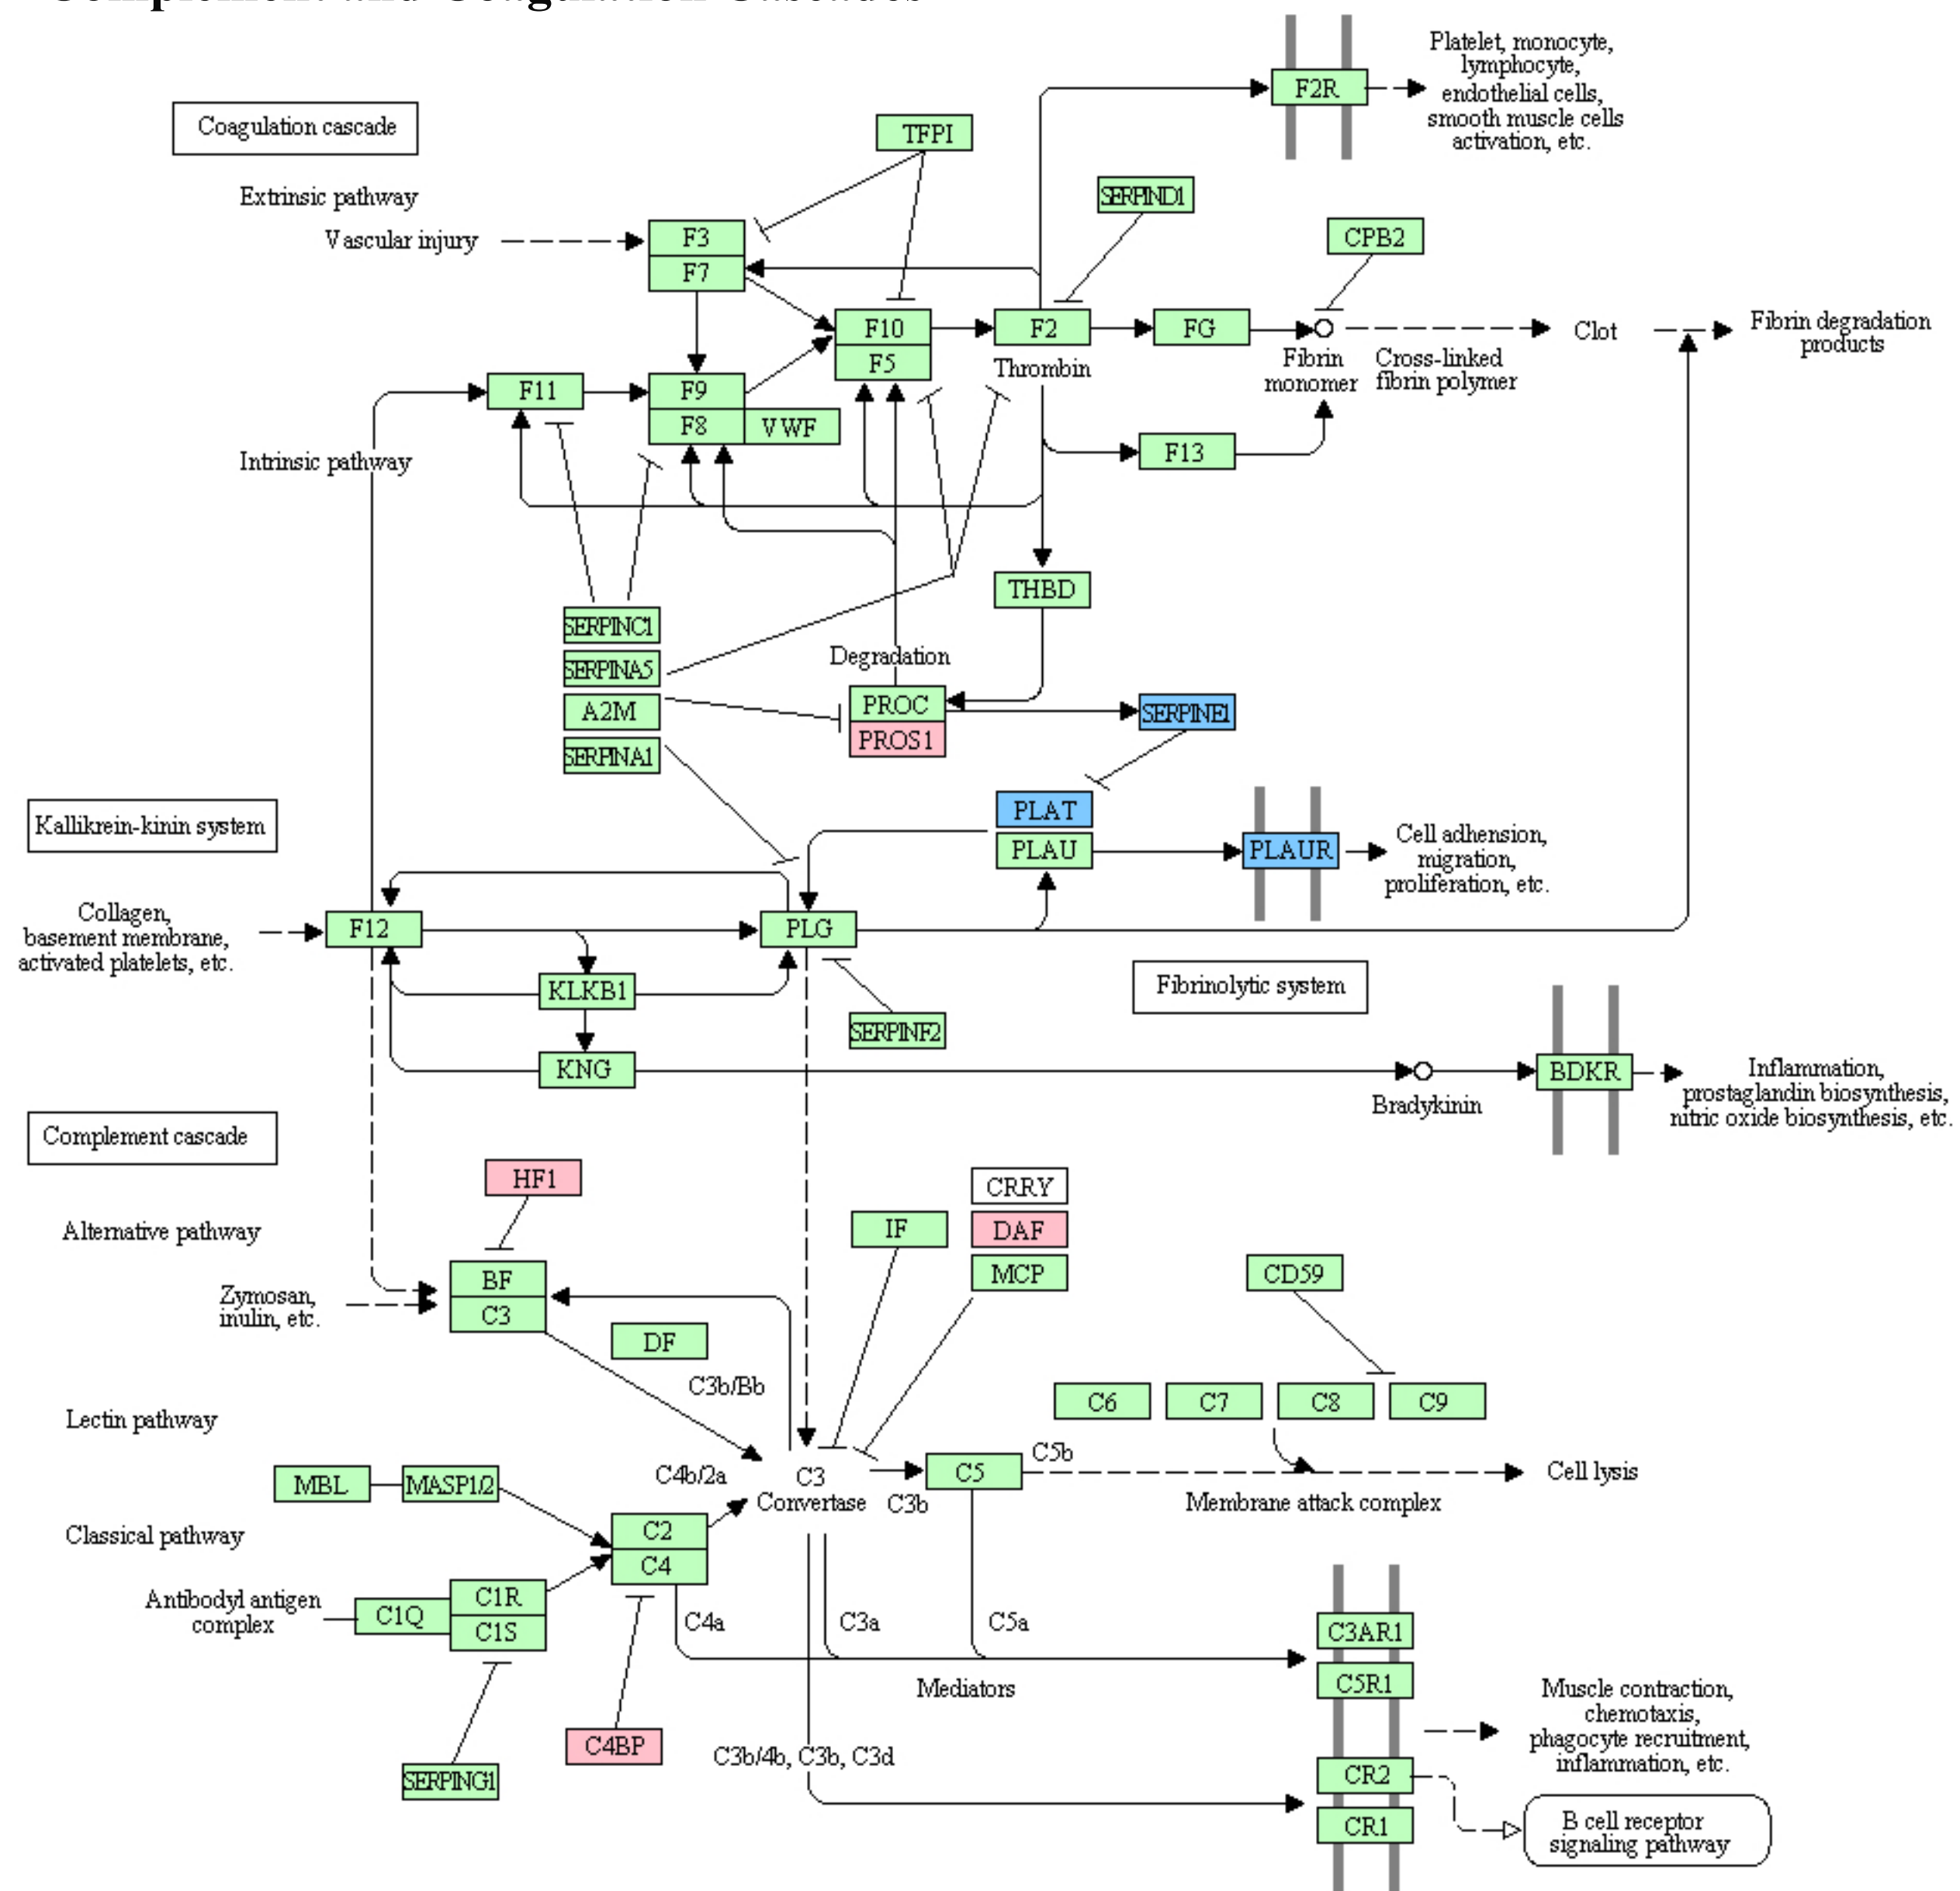

# NOD-Like Receptor Signaling Pathway

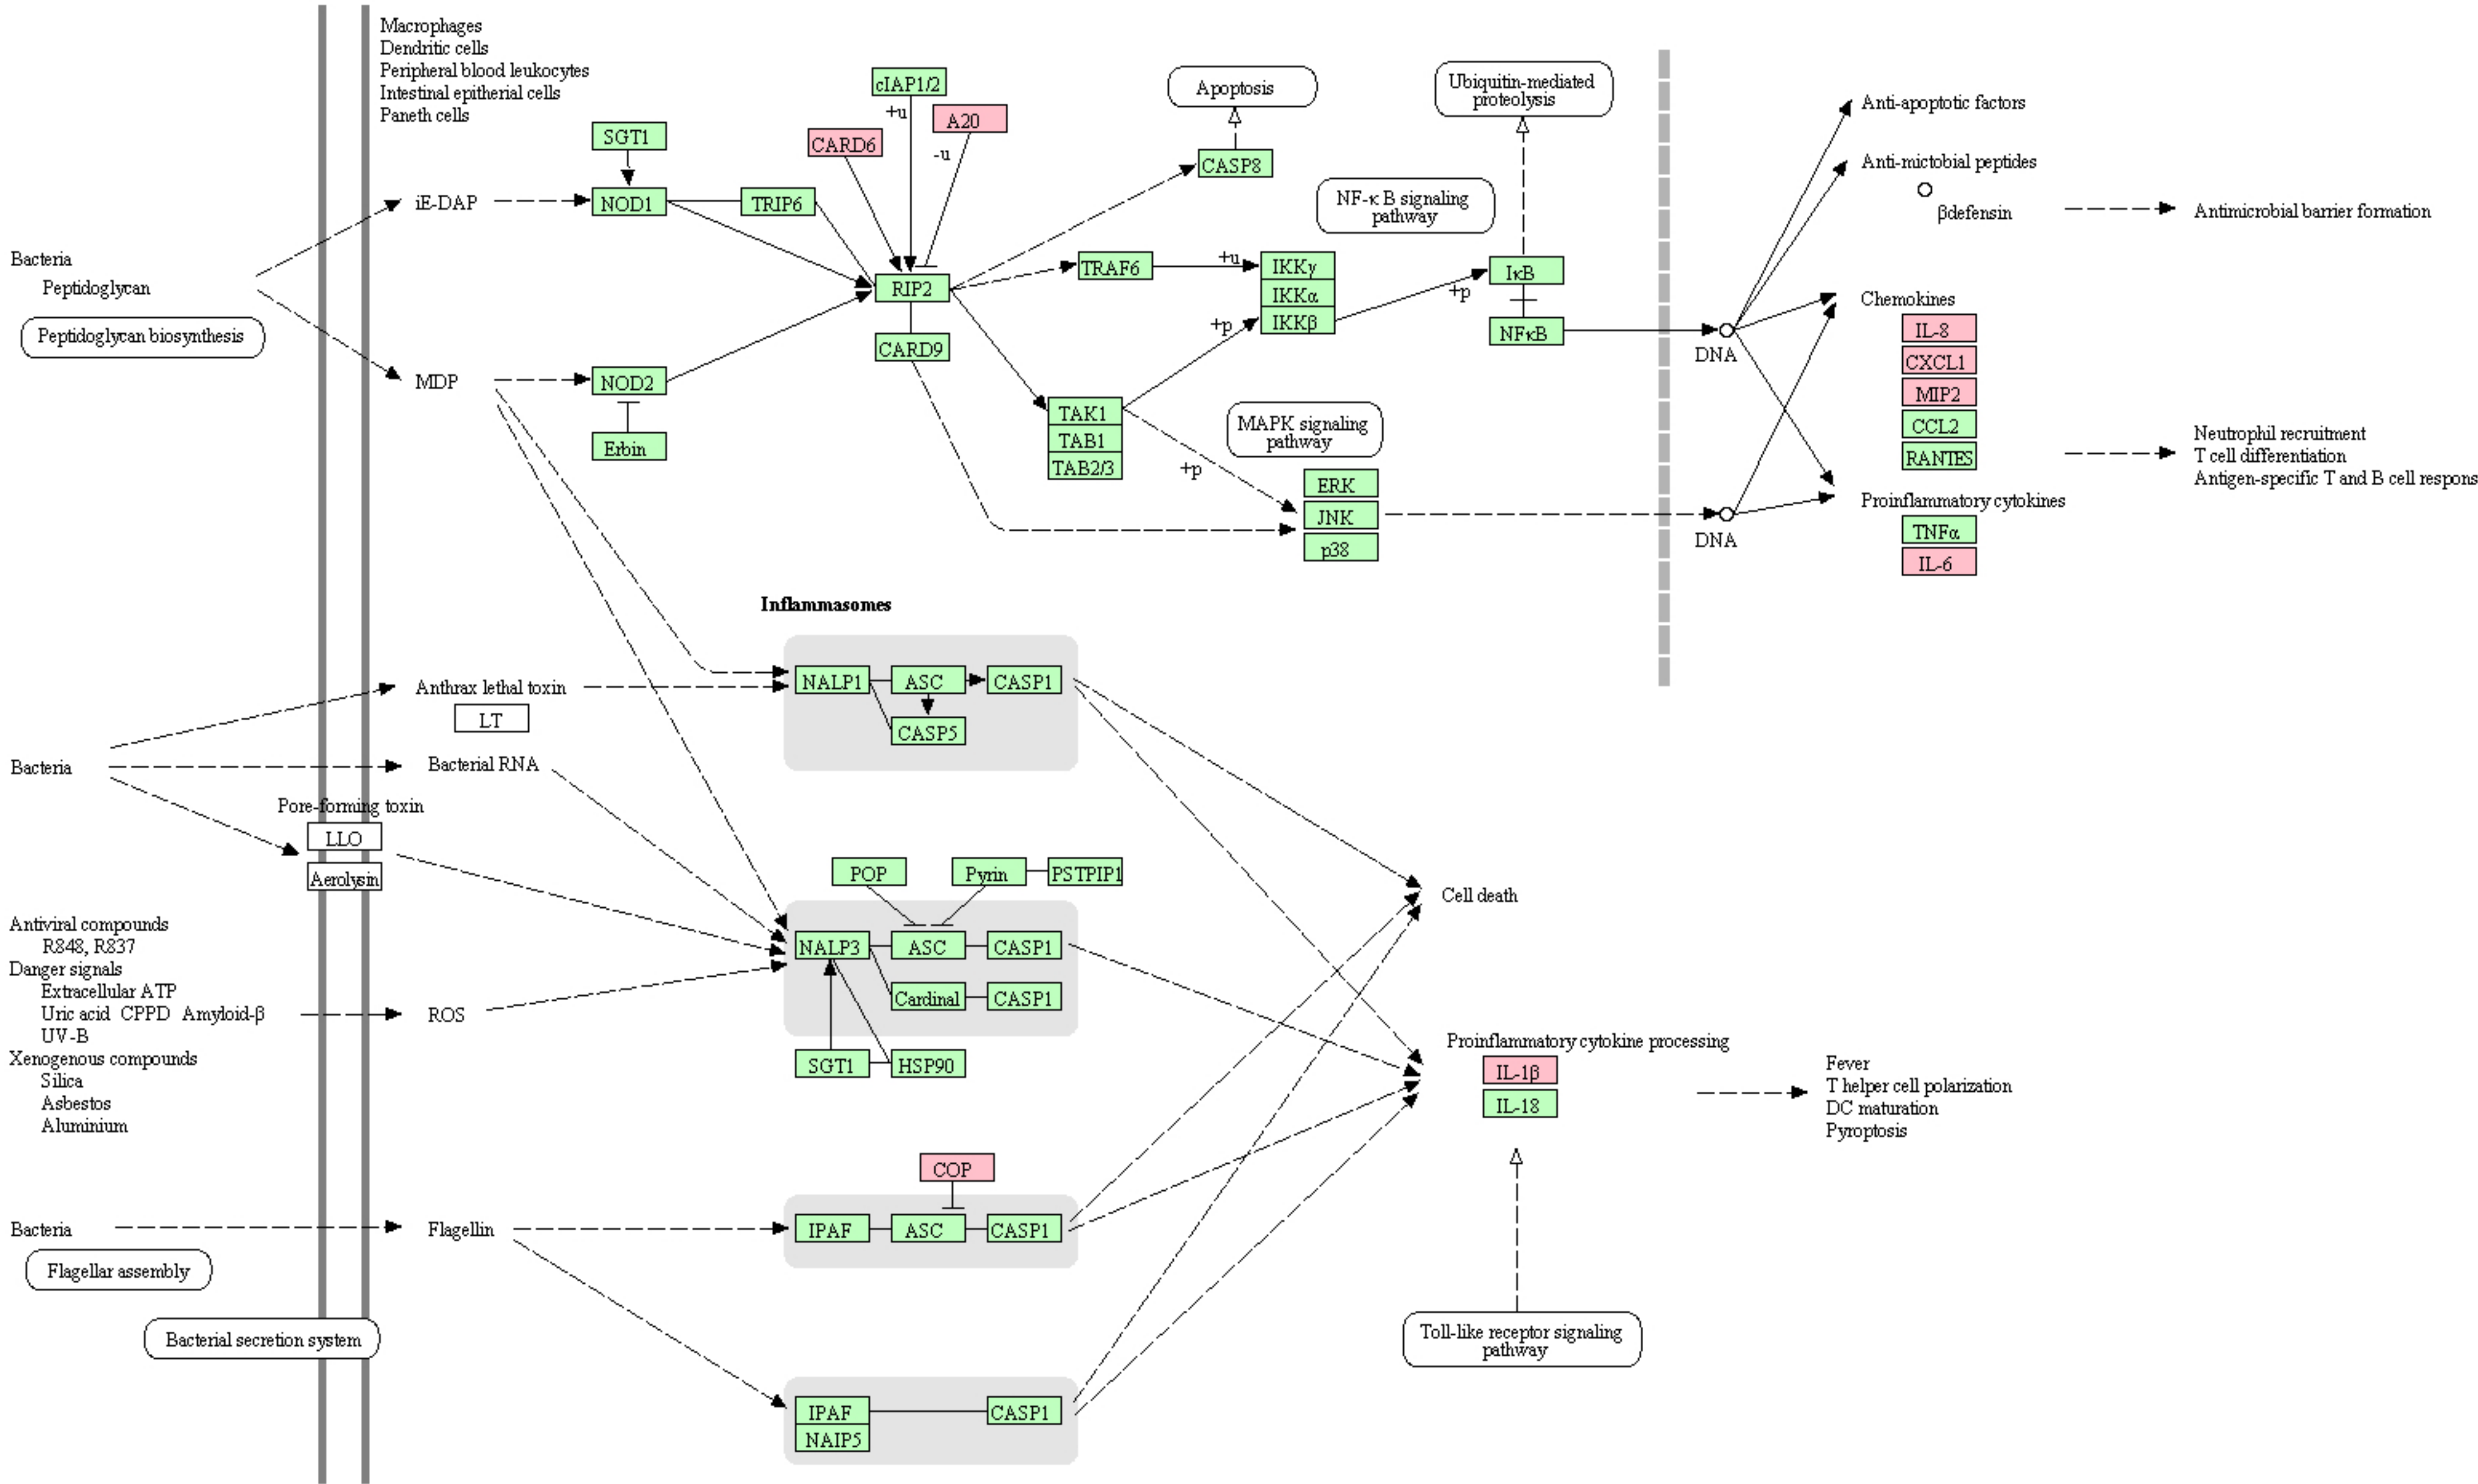

Hematopoietic Cell Lineage

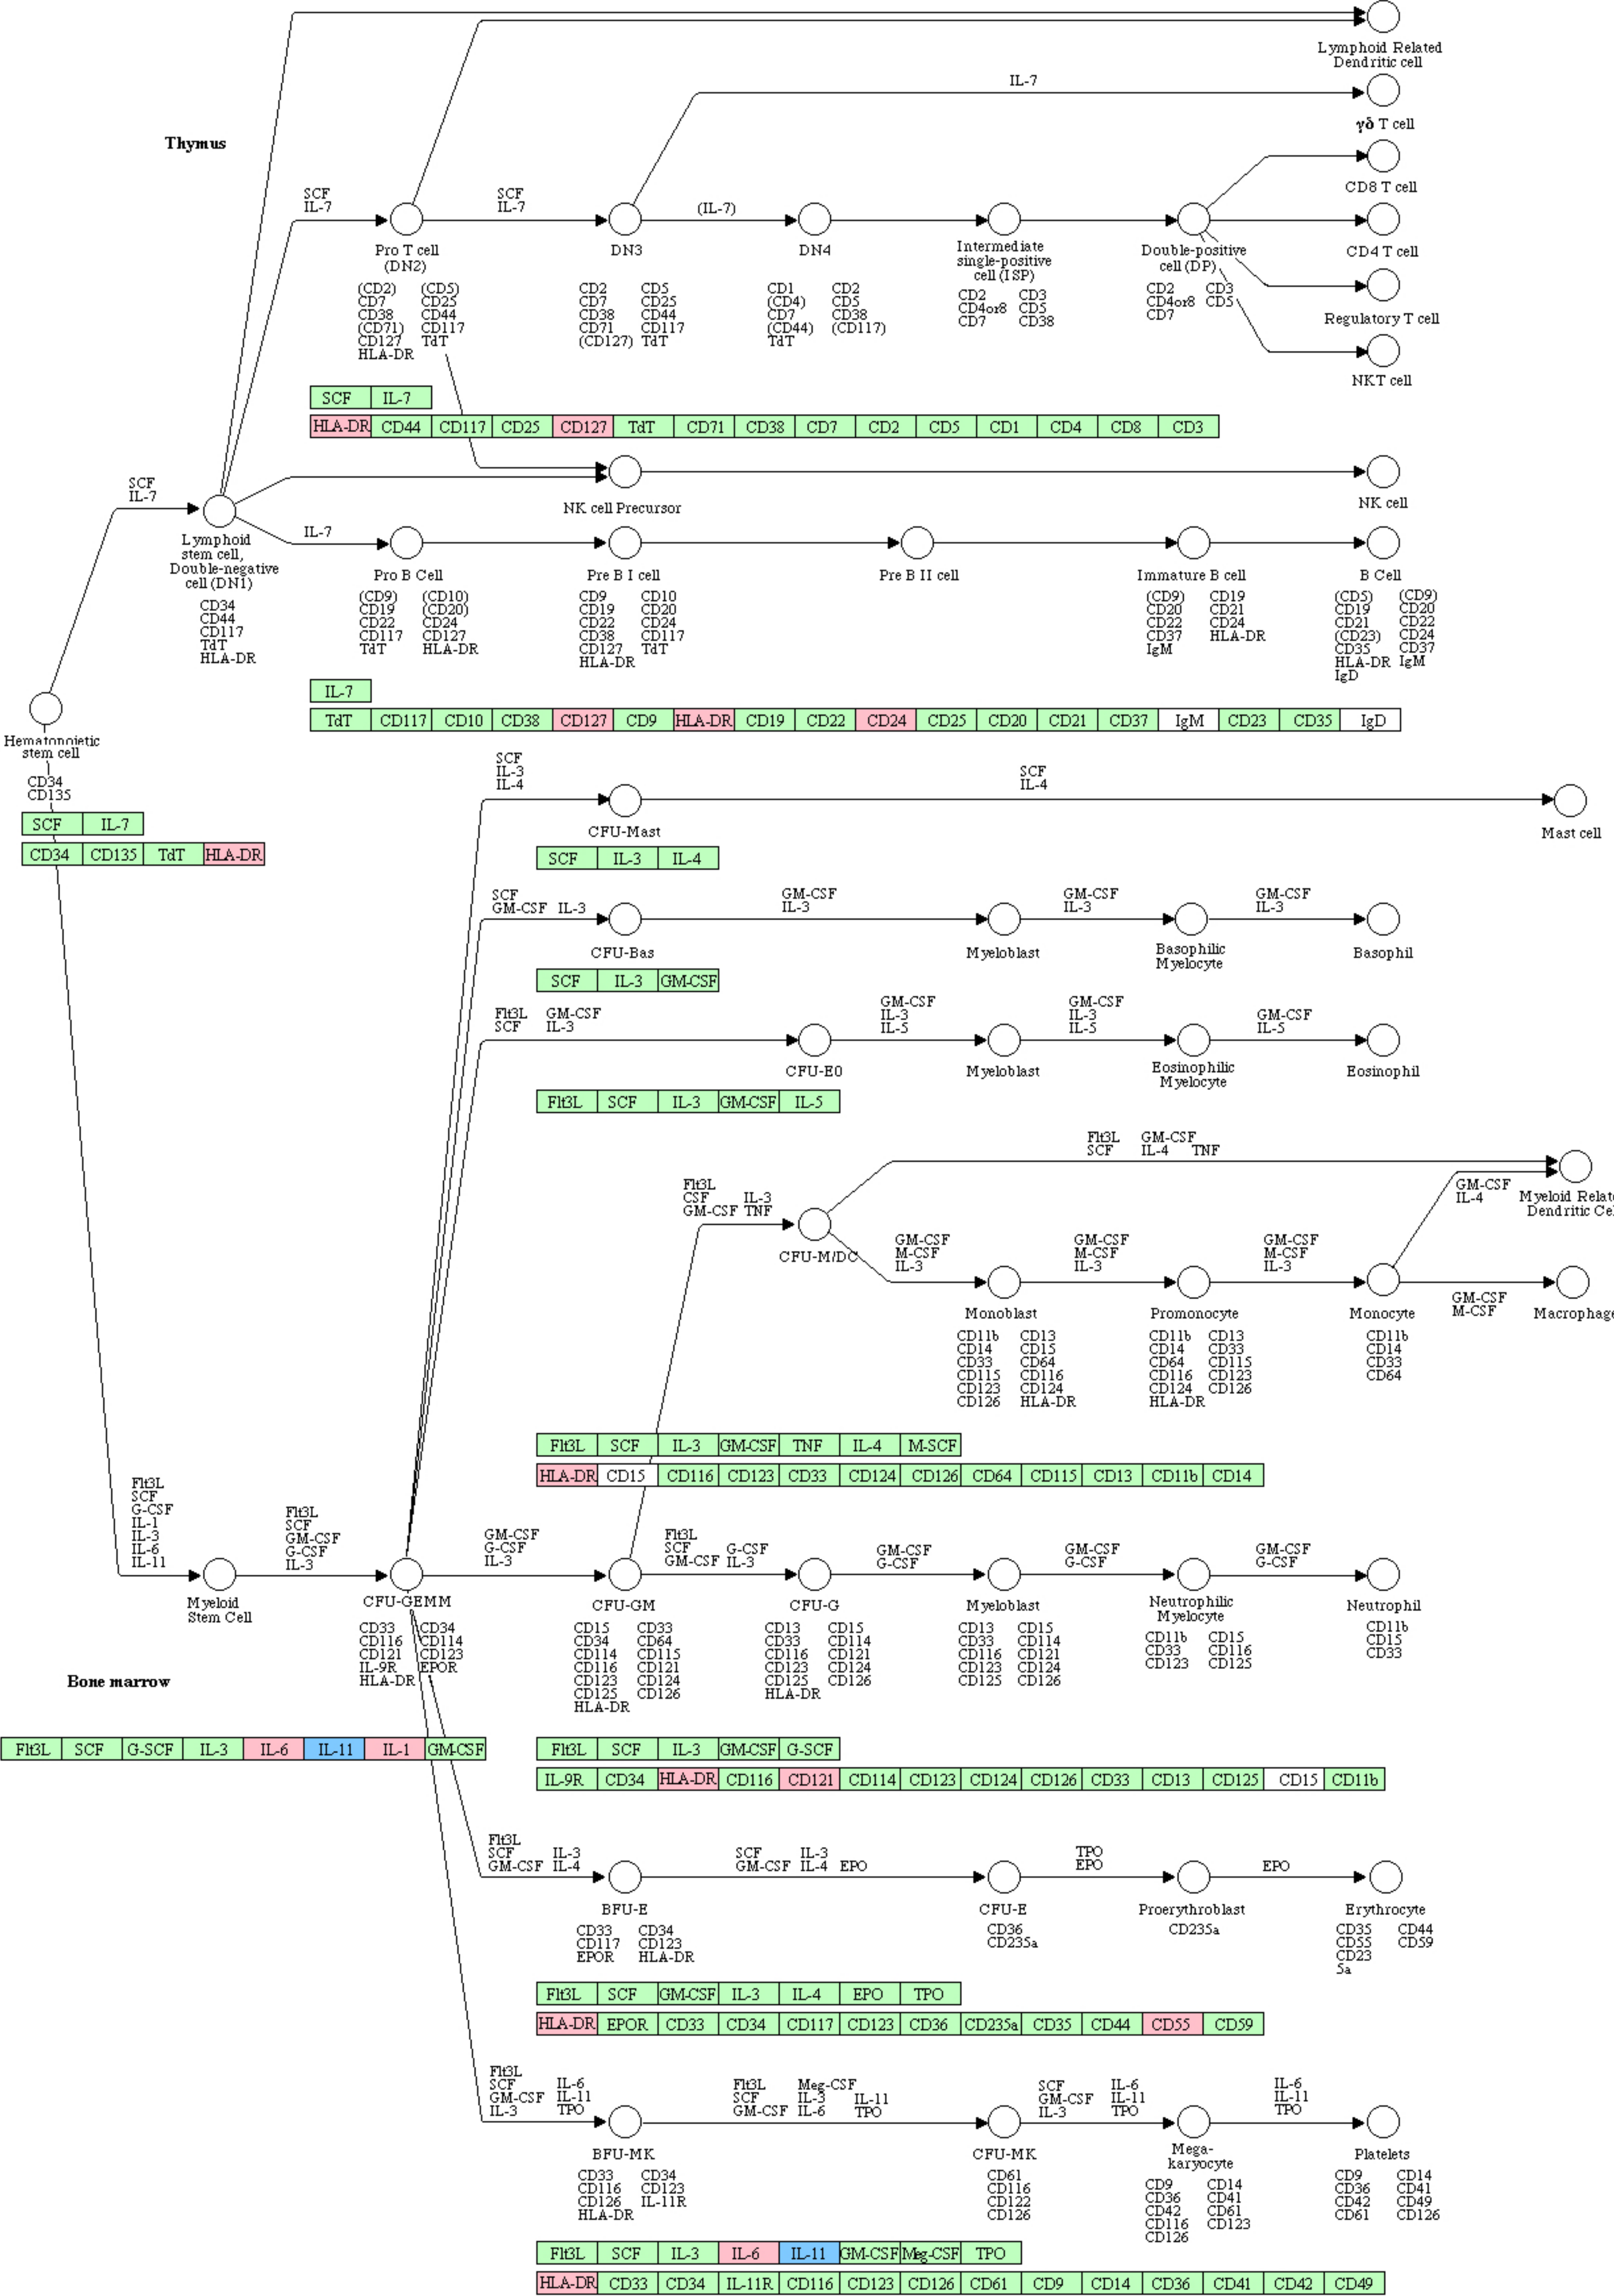

# FcγR-Mediated Phagocytosis

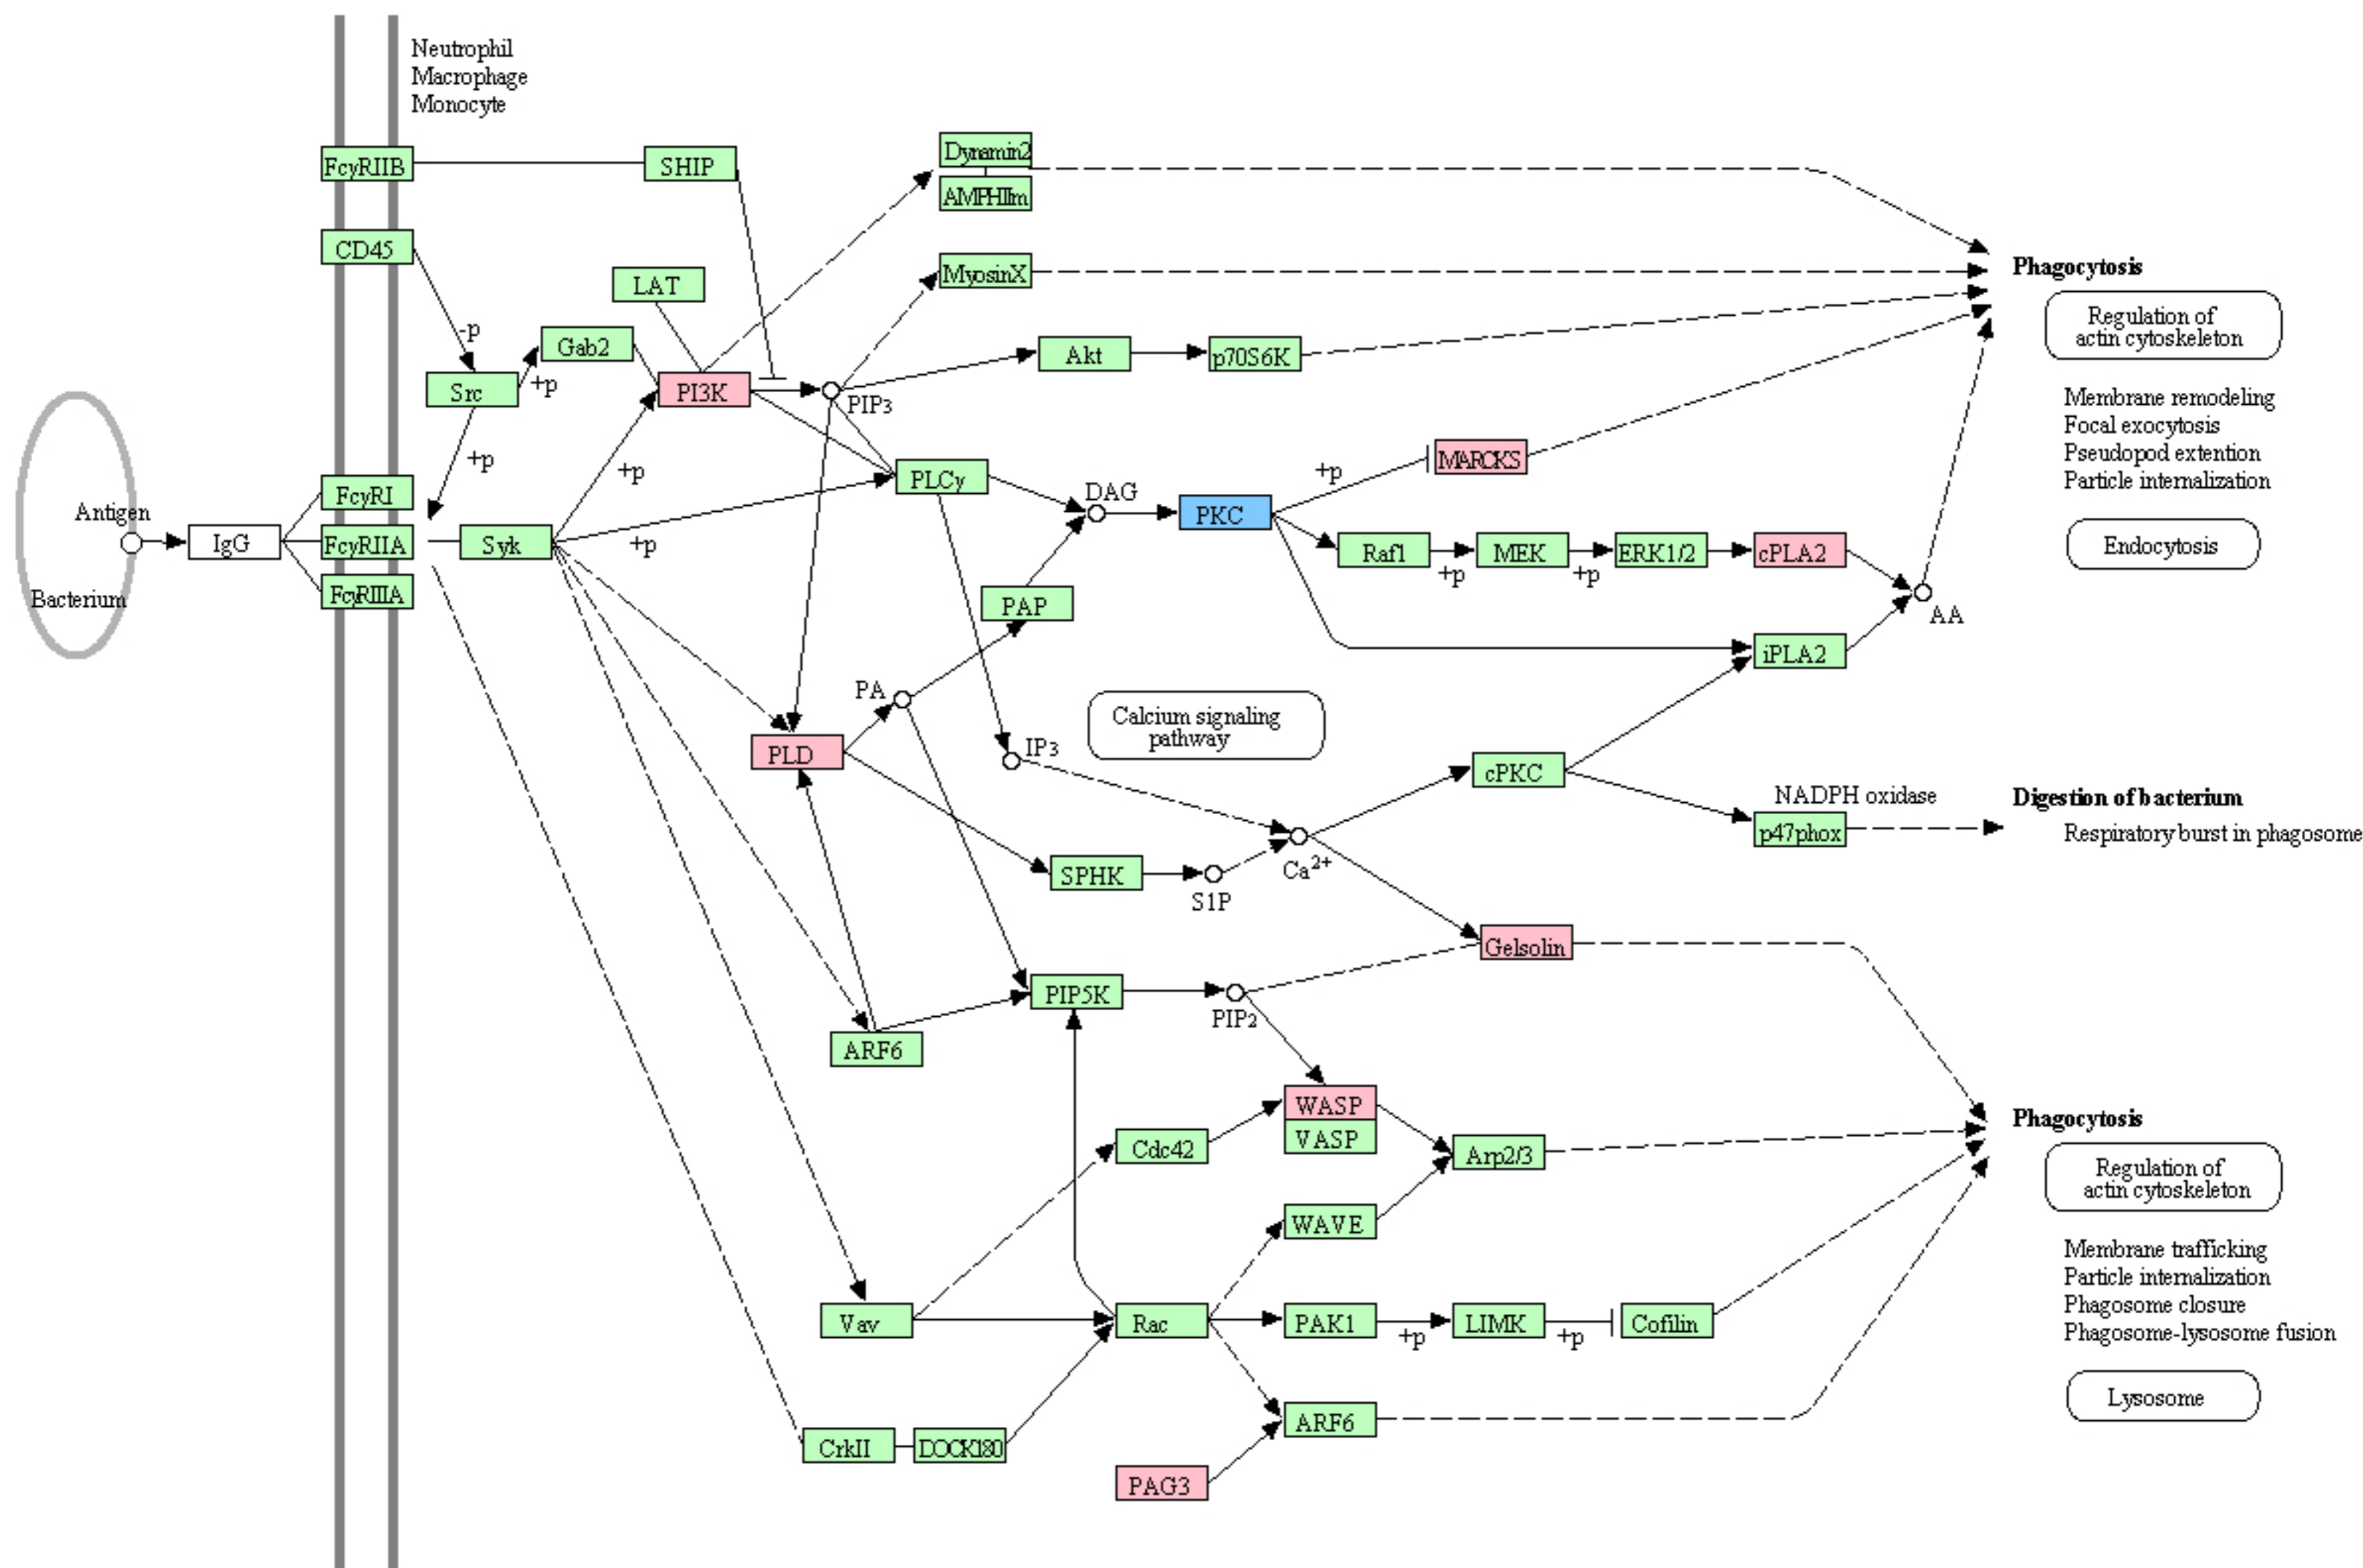

# Type I Diabetes Mellitus

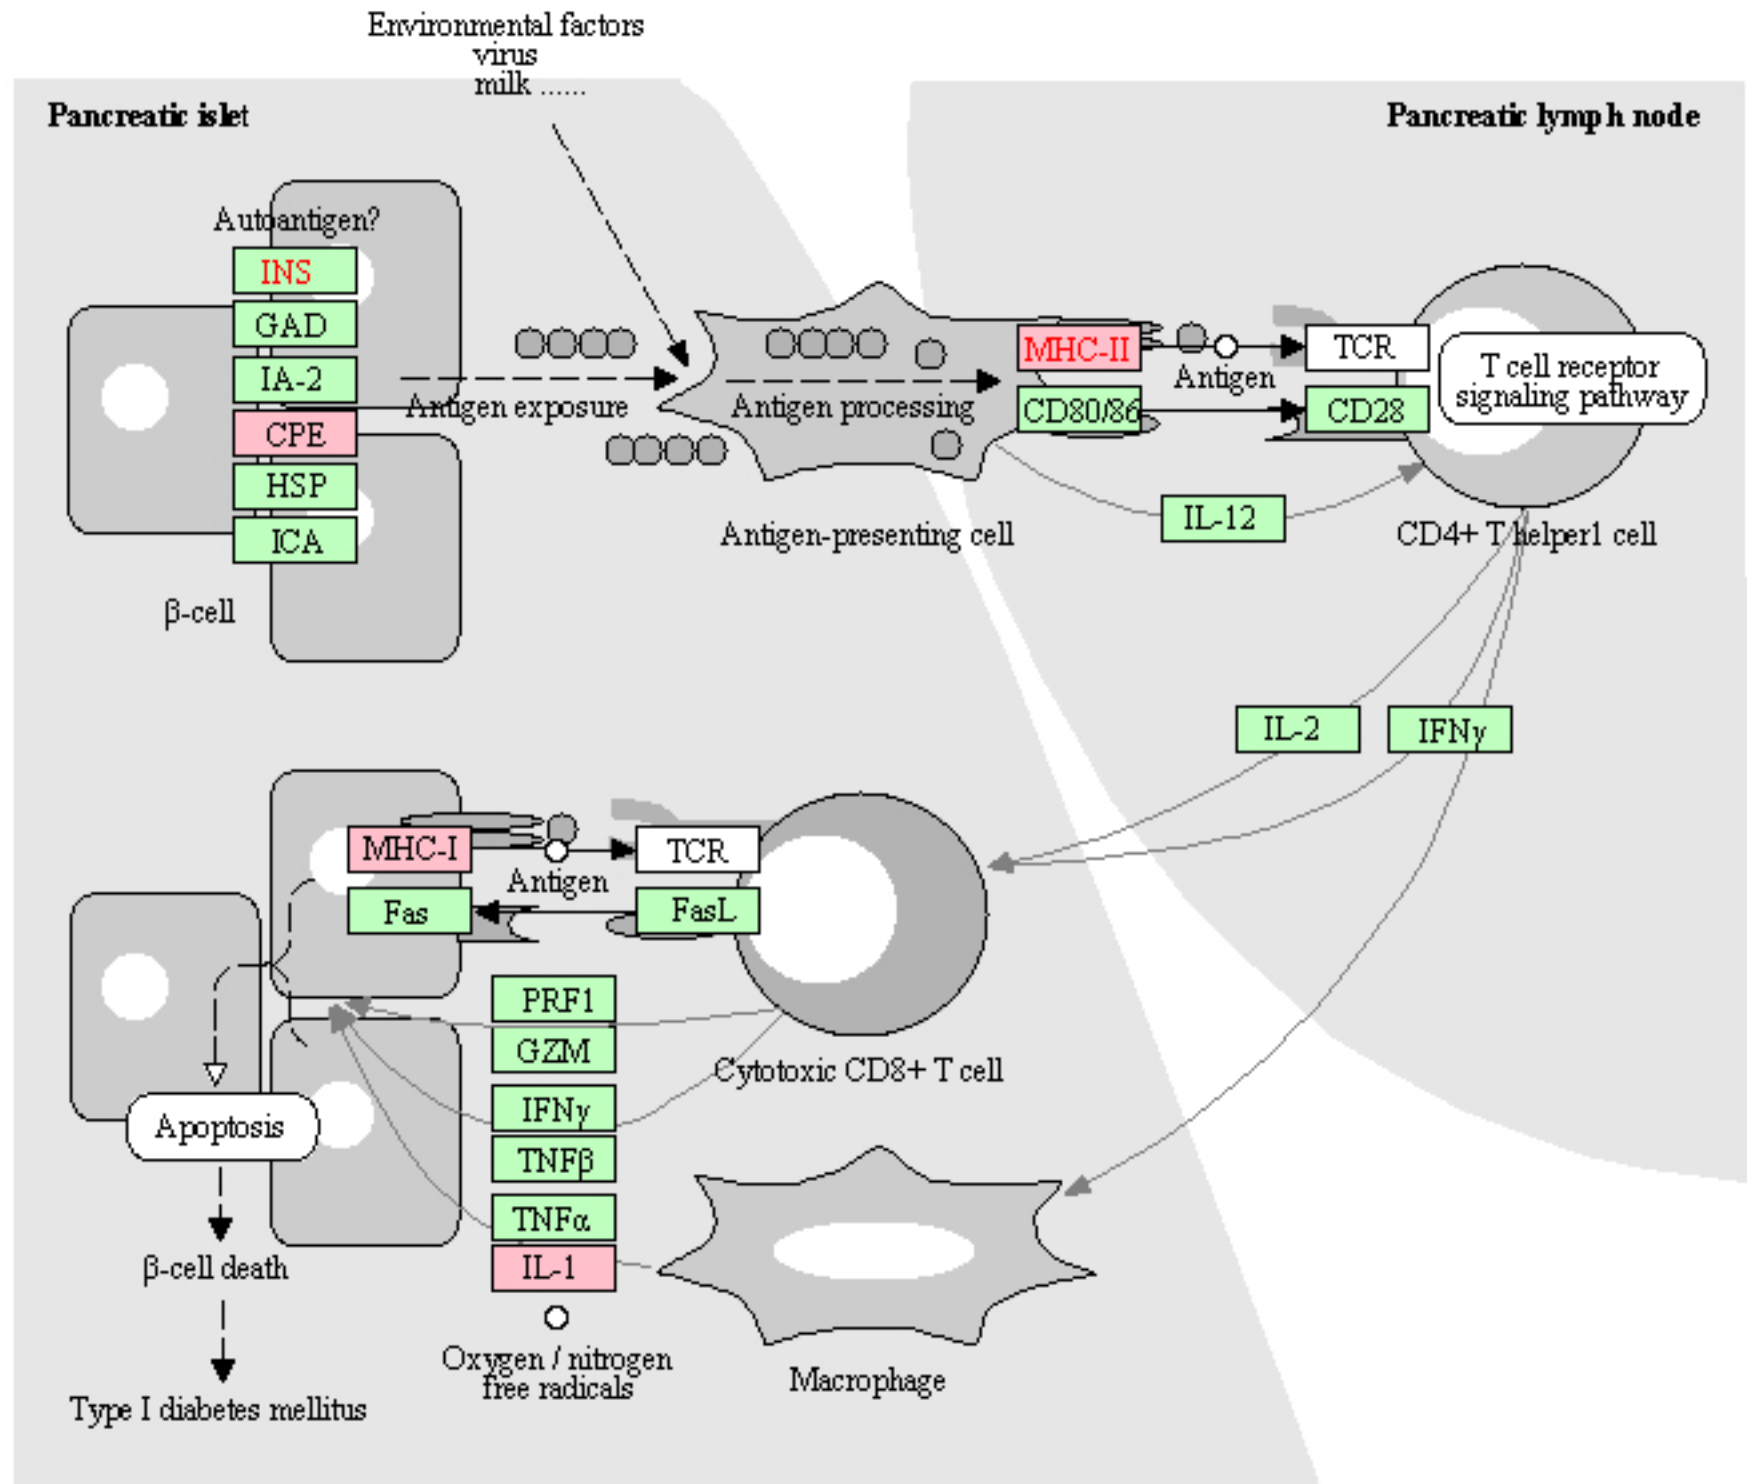

# Bacterial Invasion of Epithelial Cells

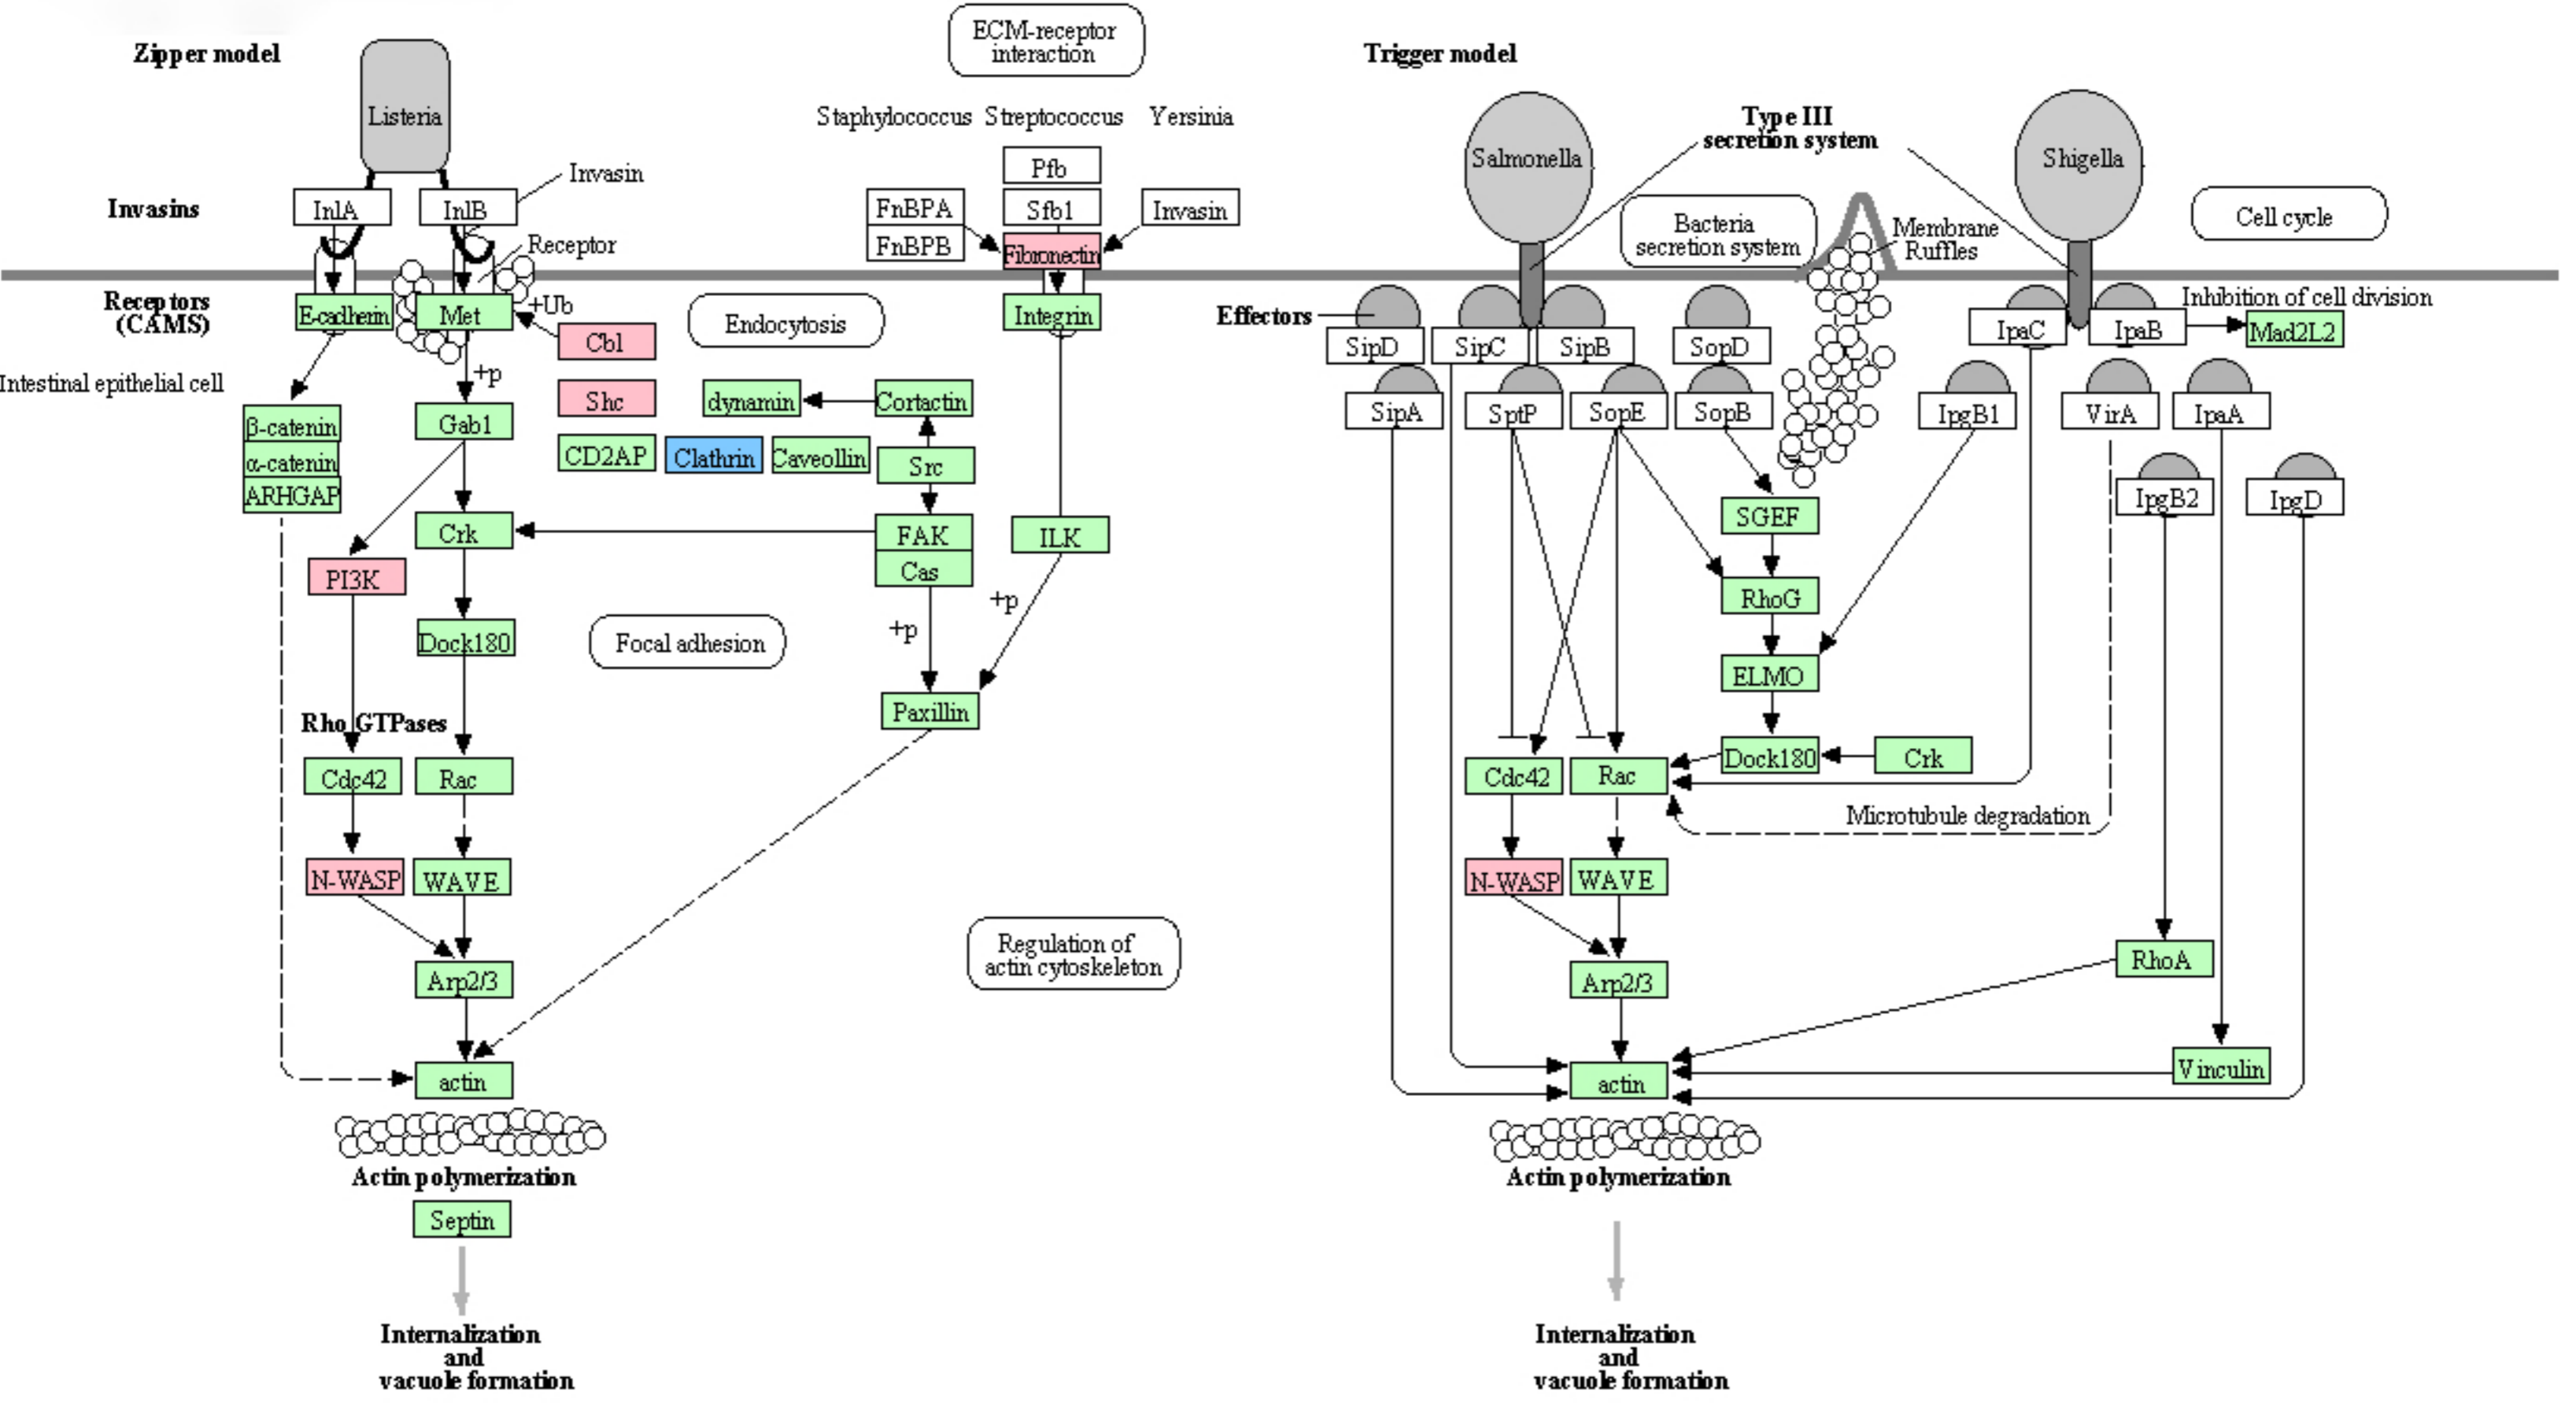

Malaria

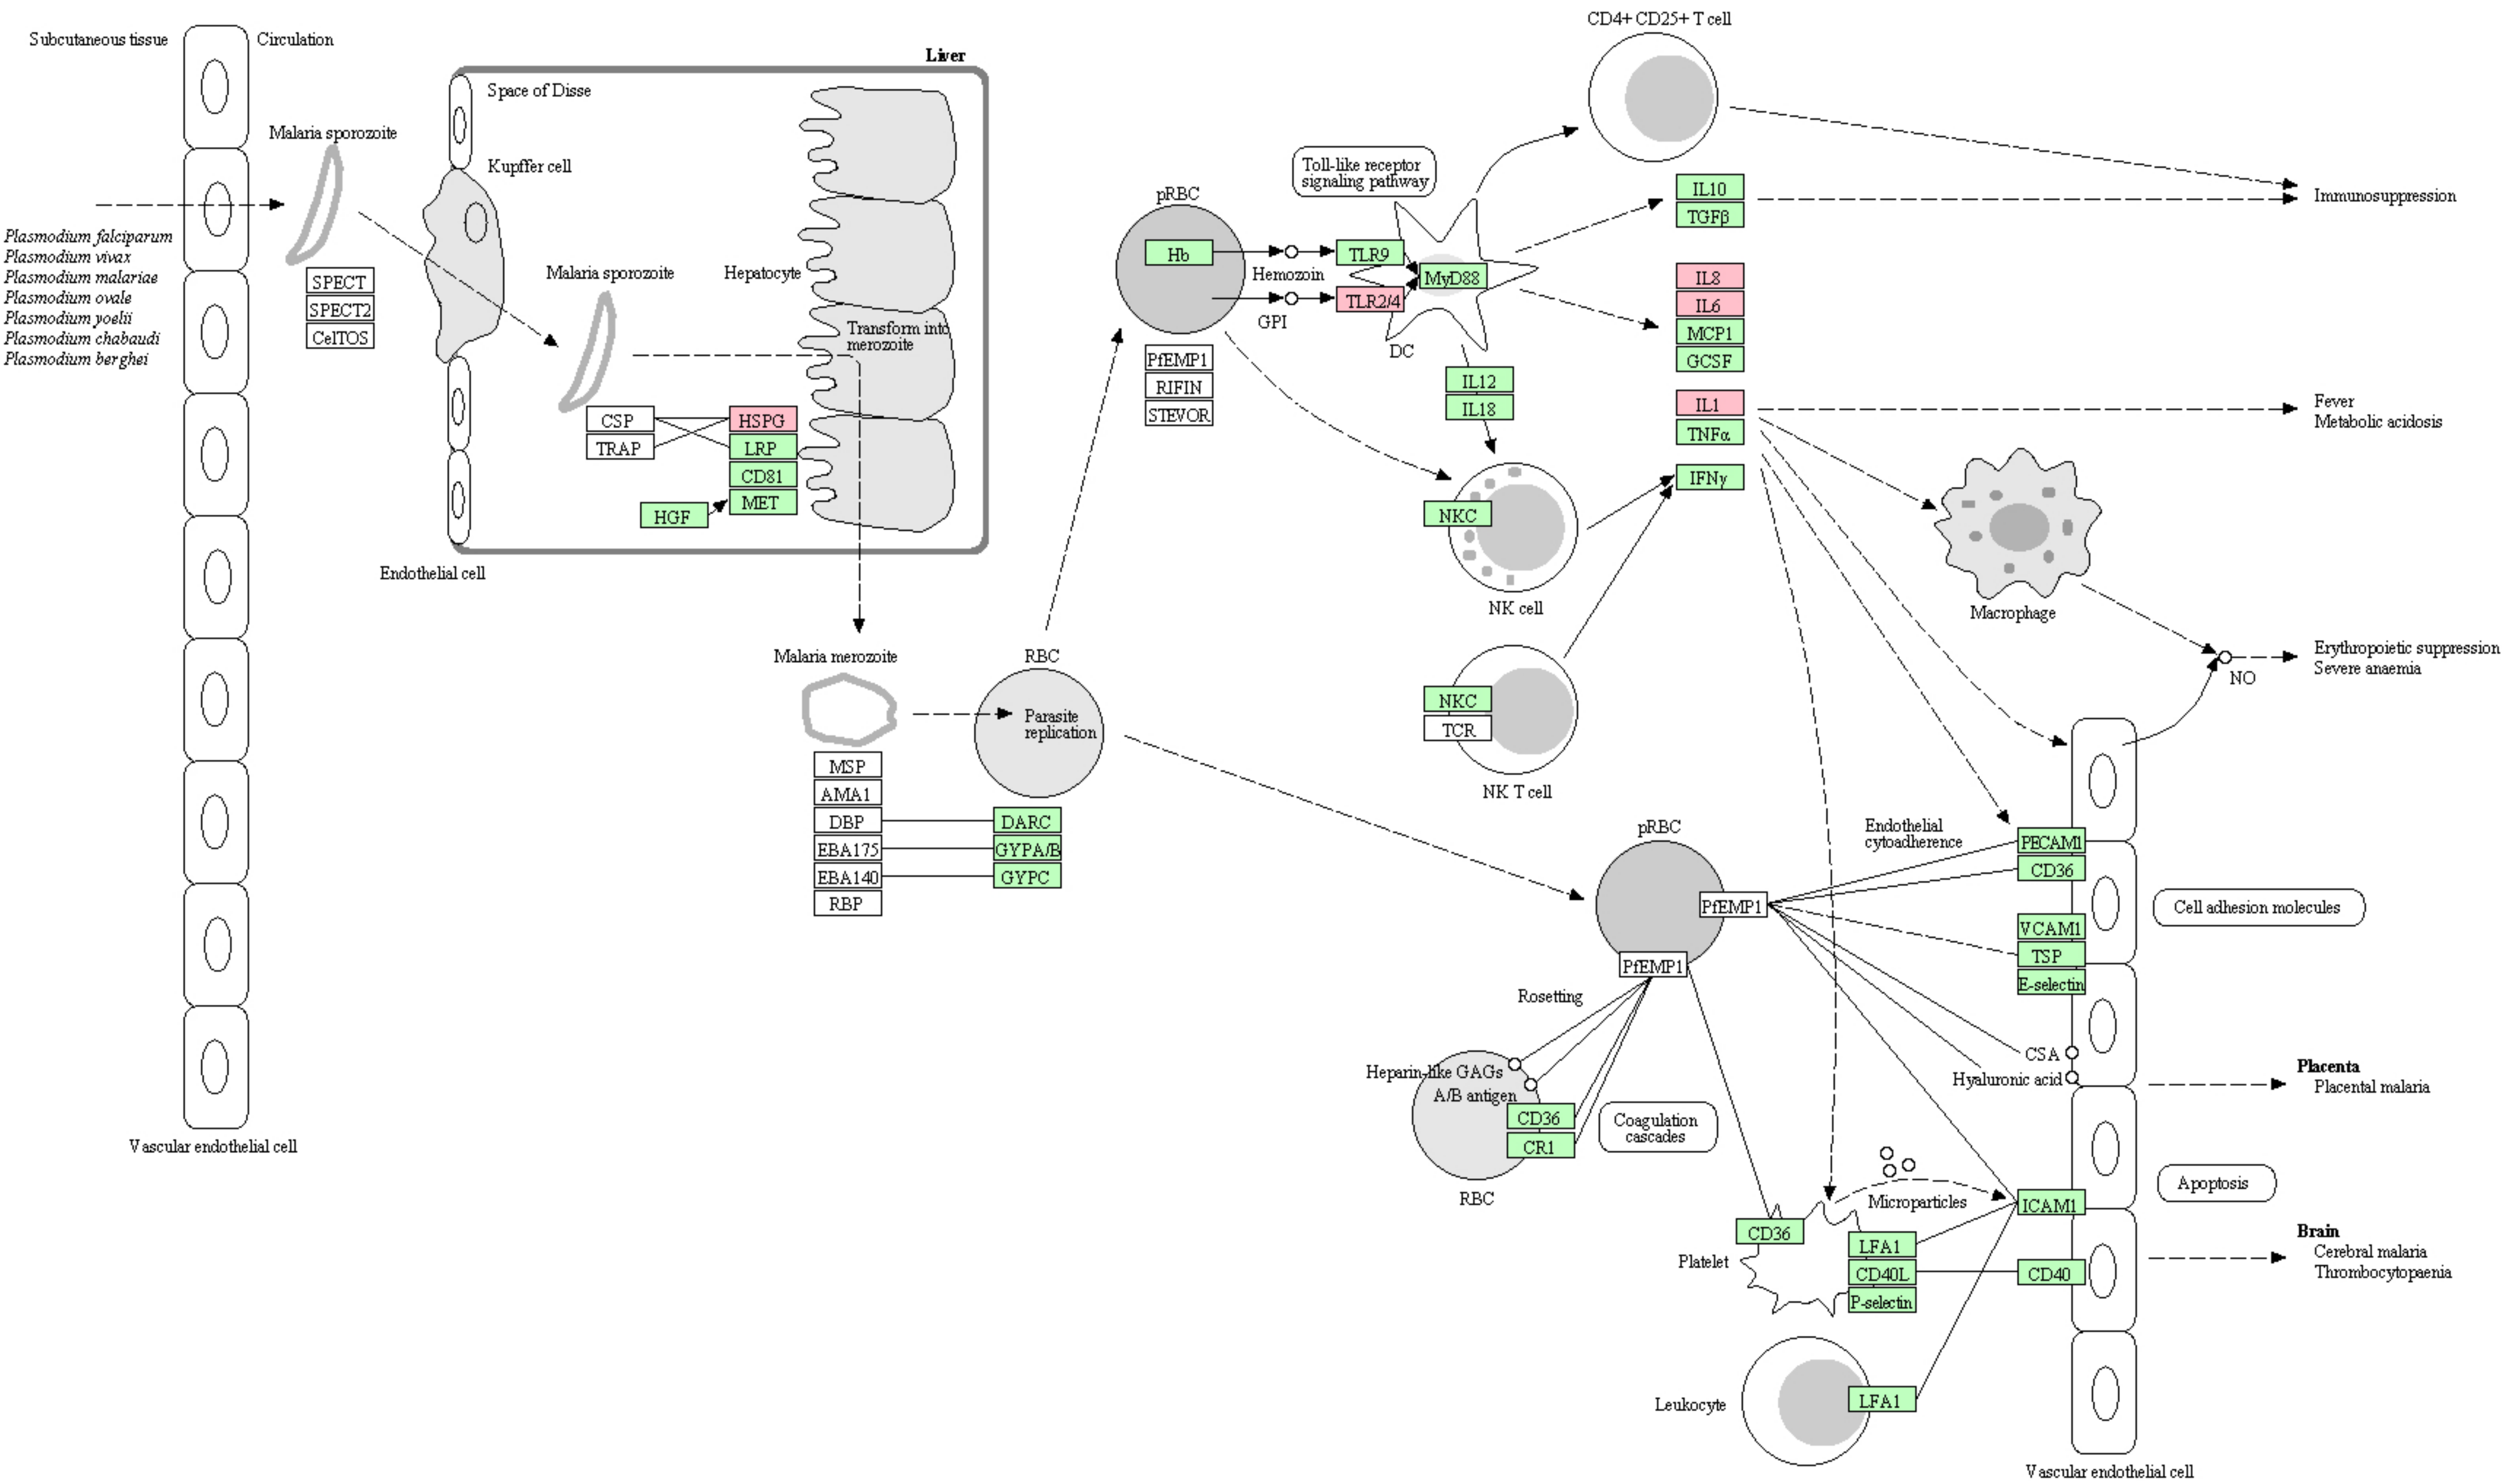

Amoebiasis

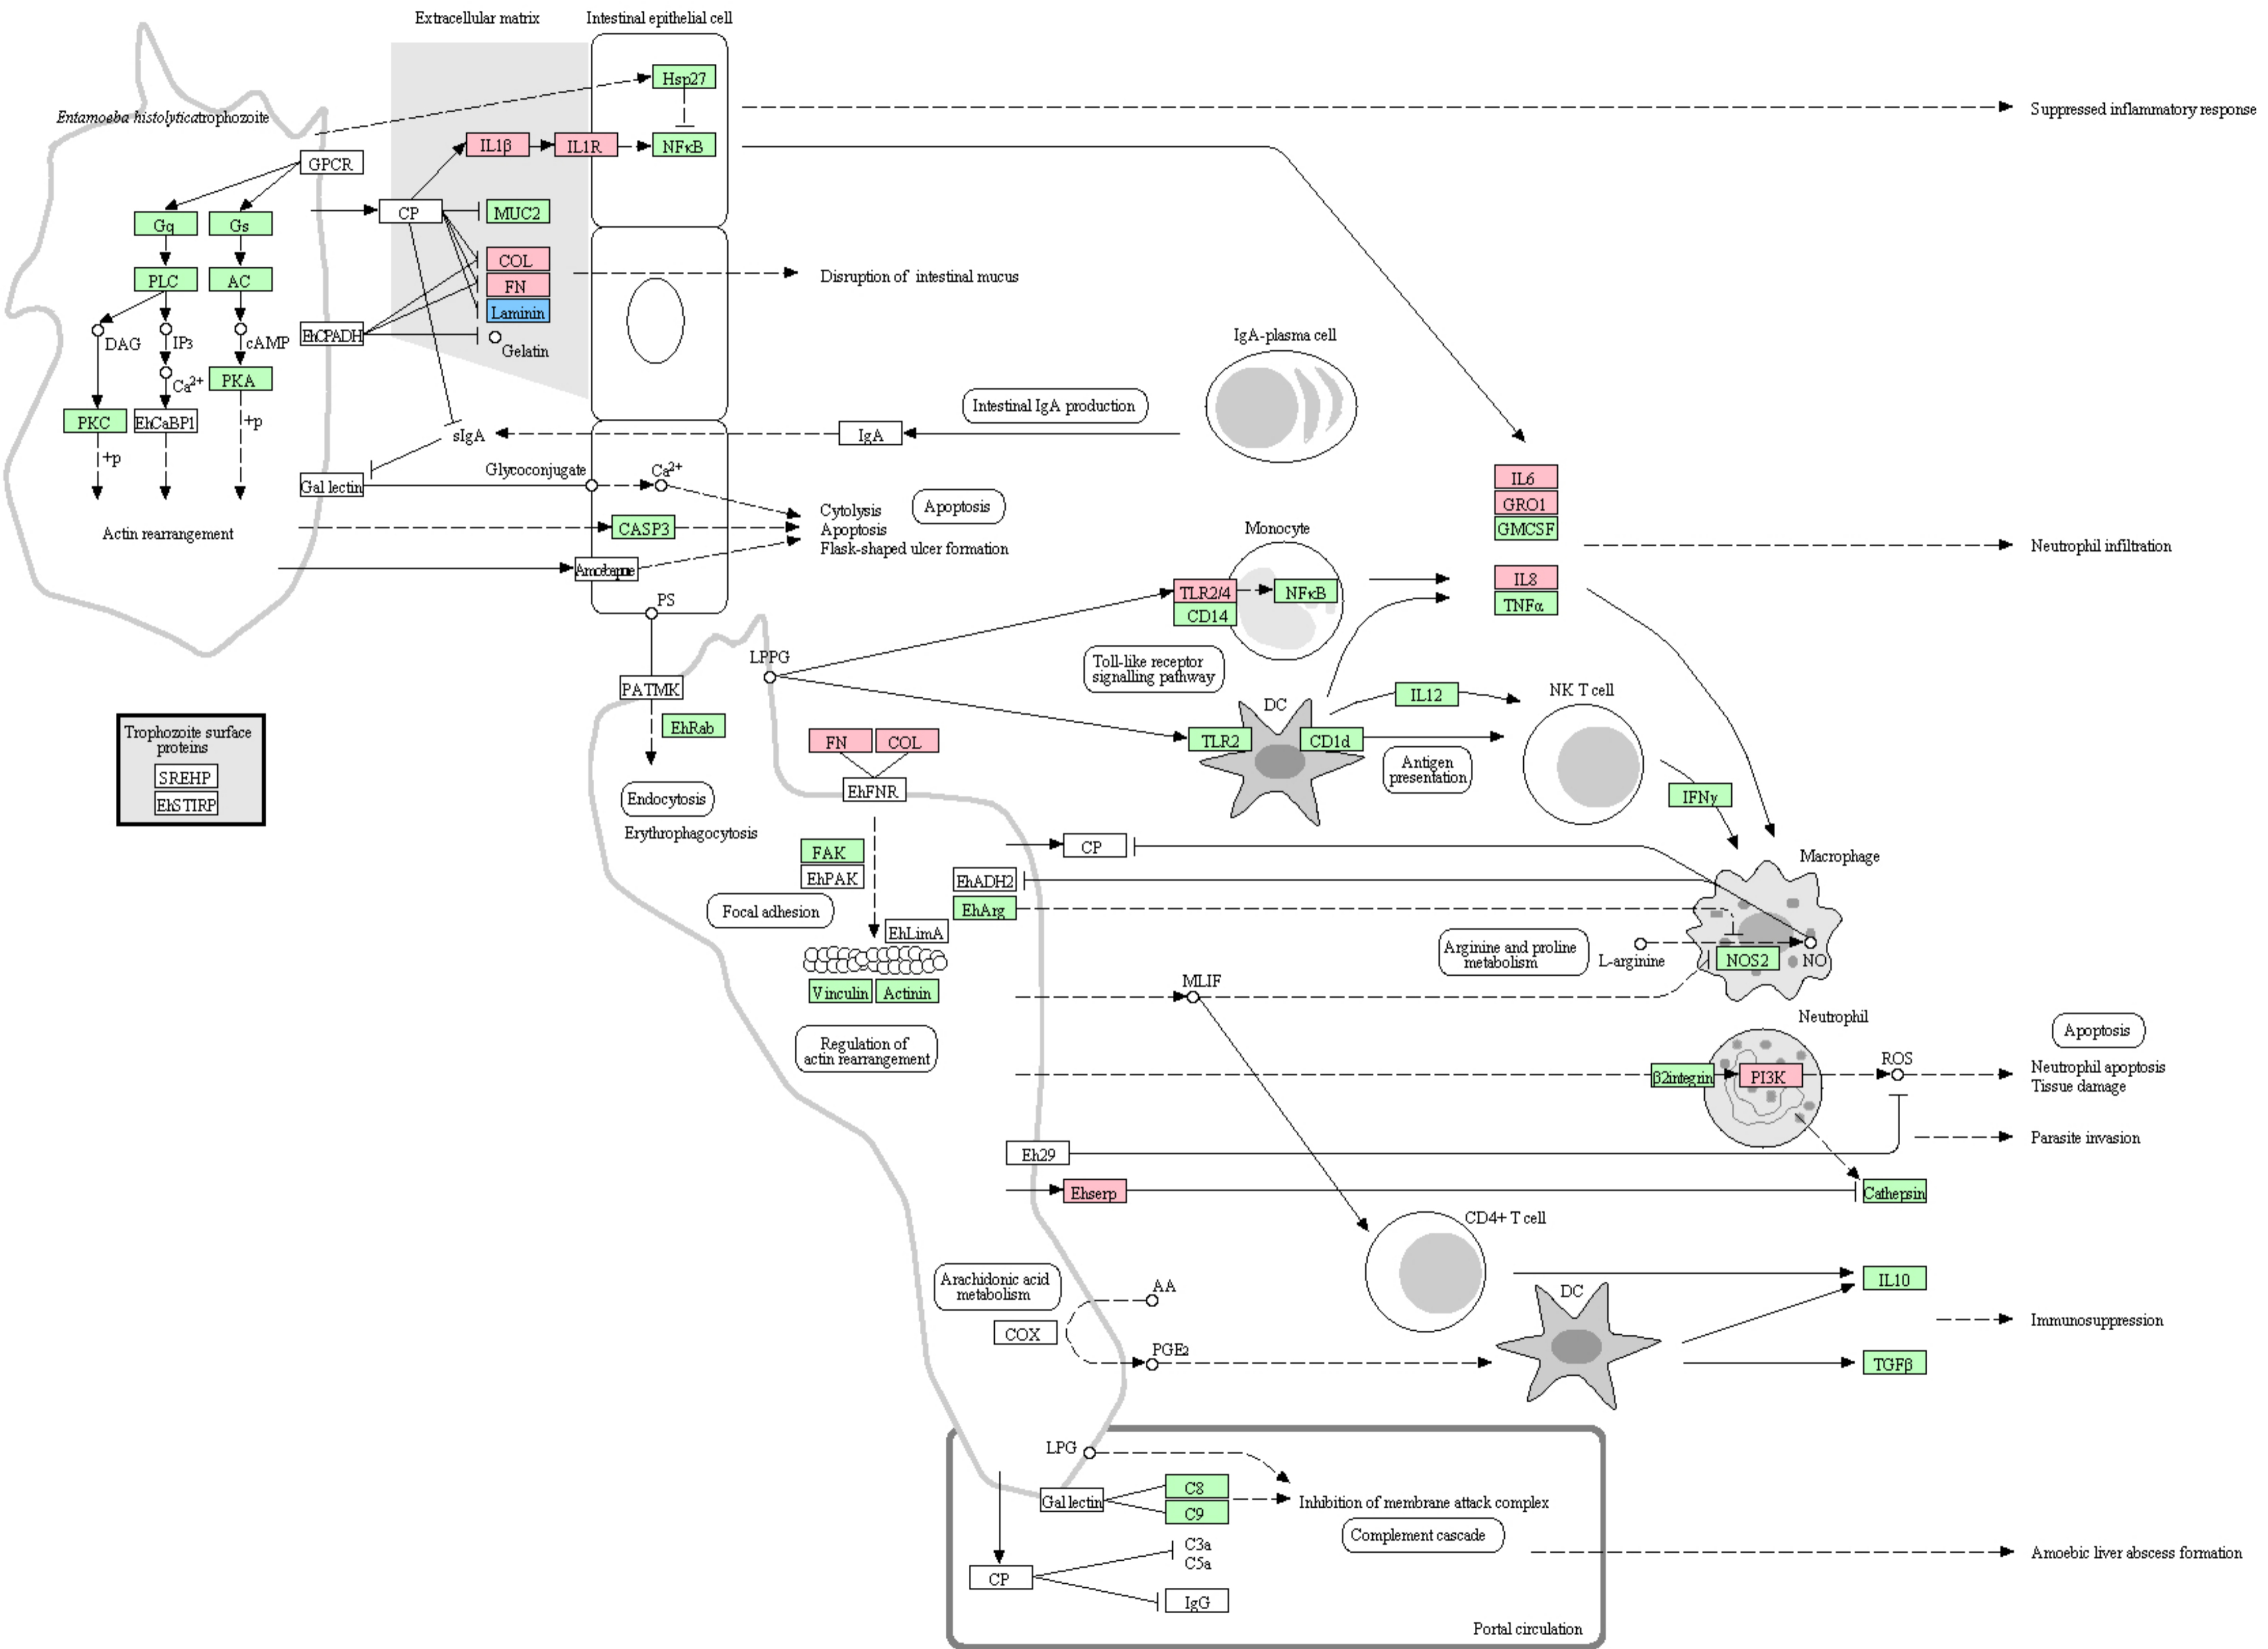

Measles

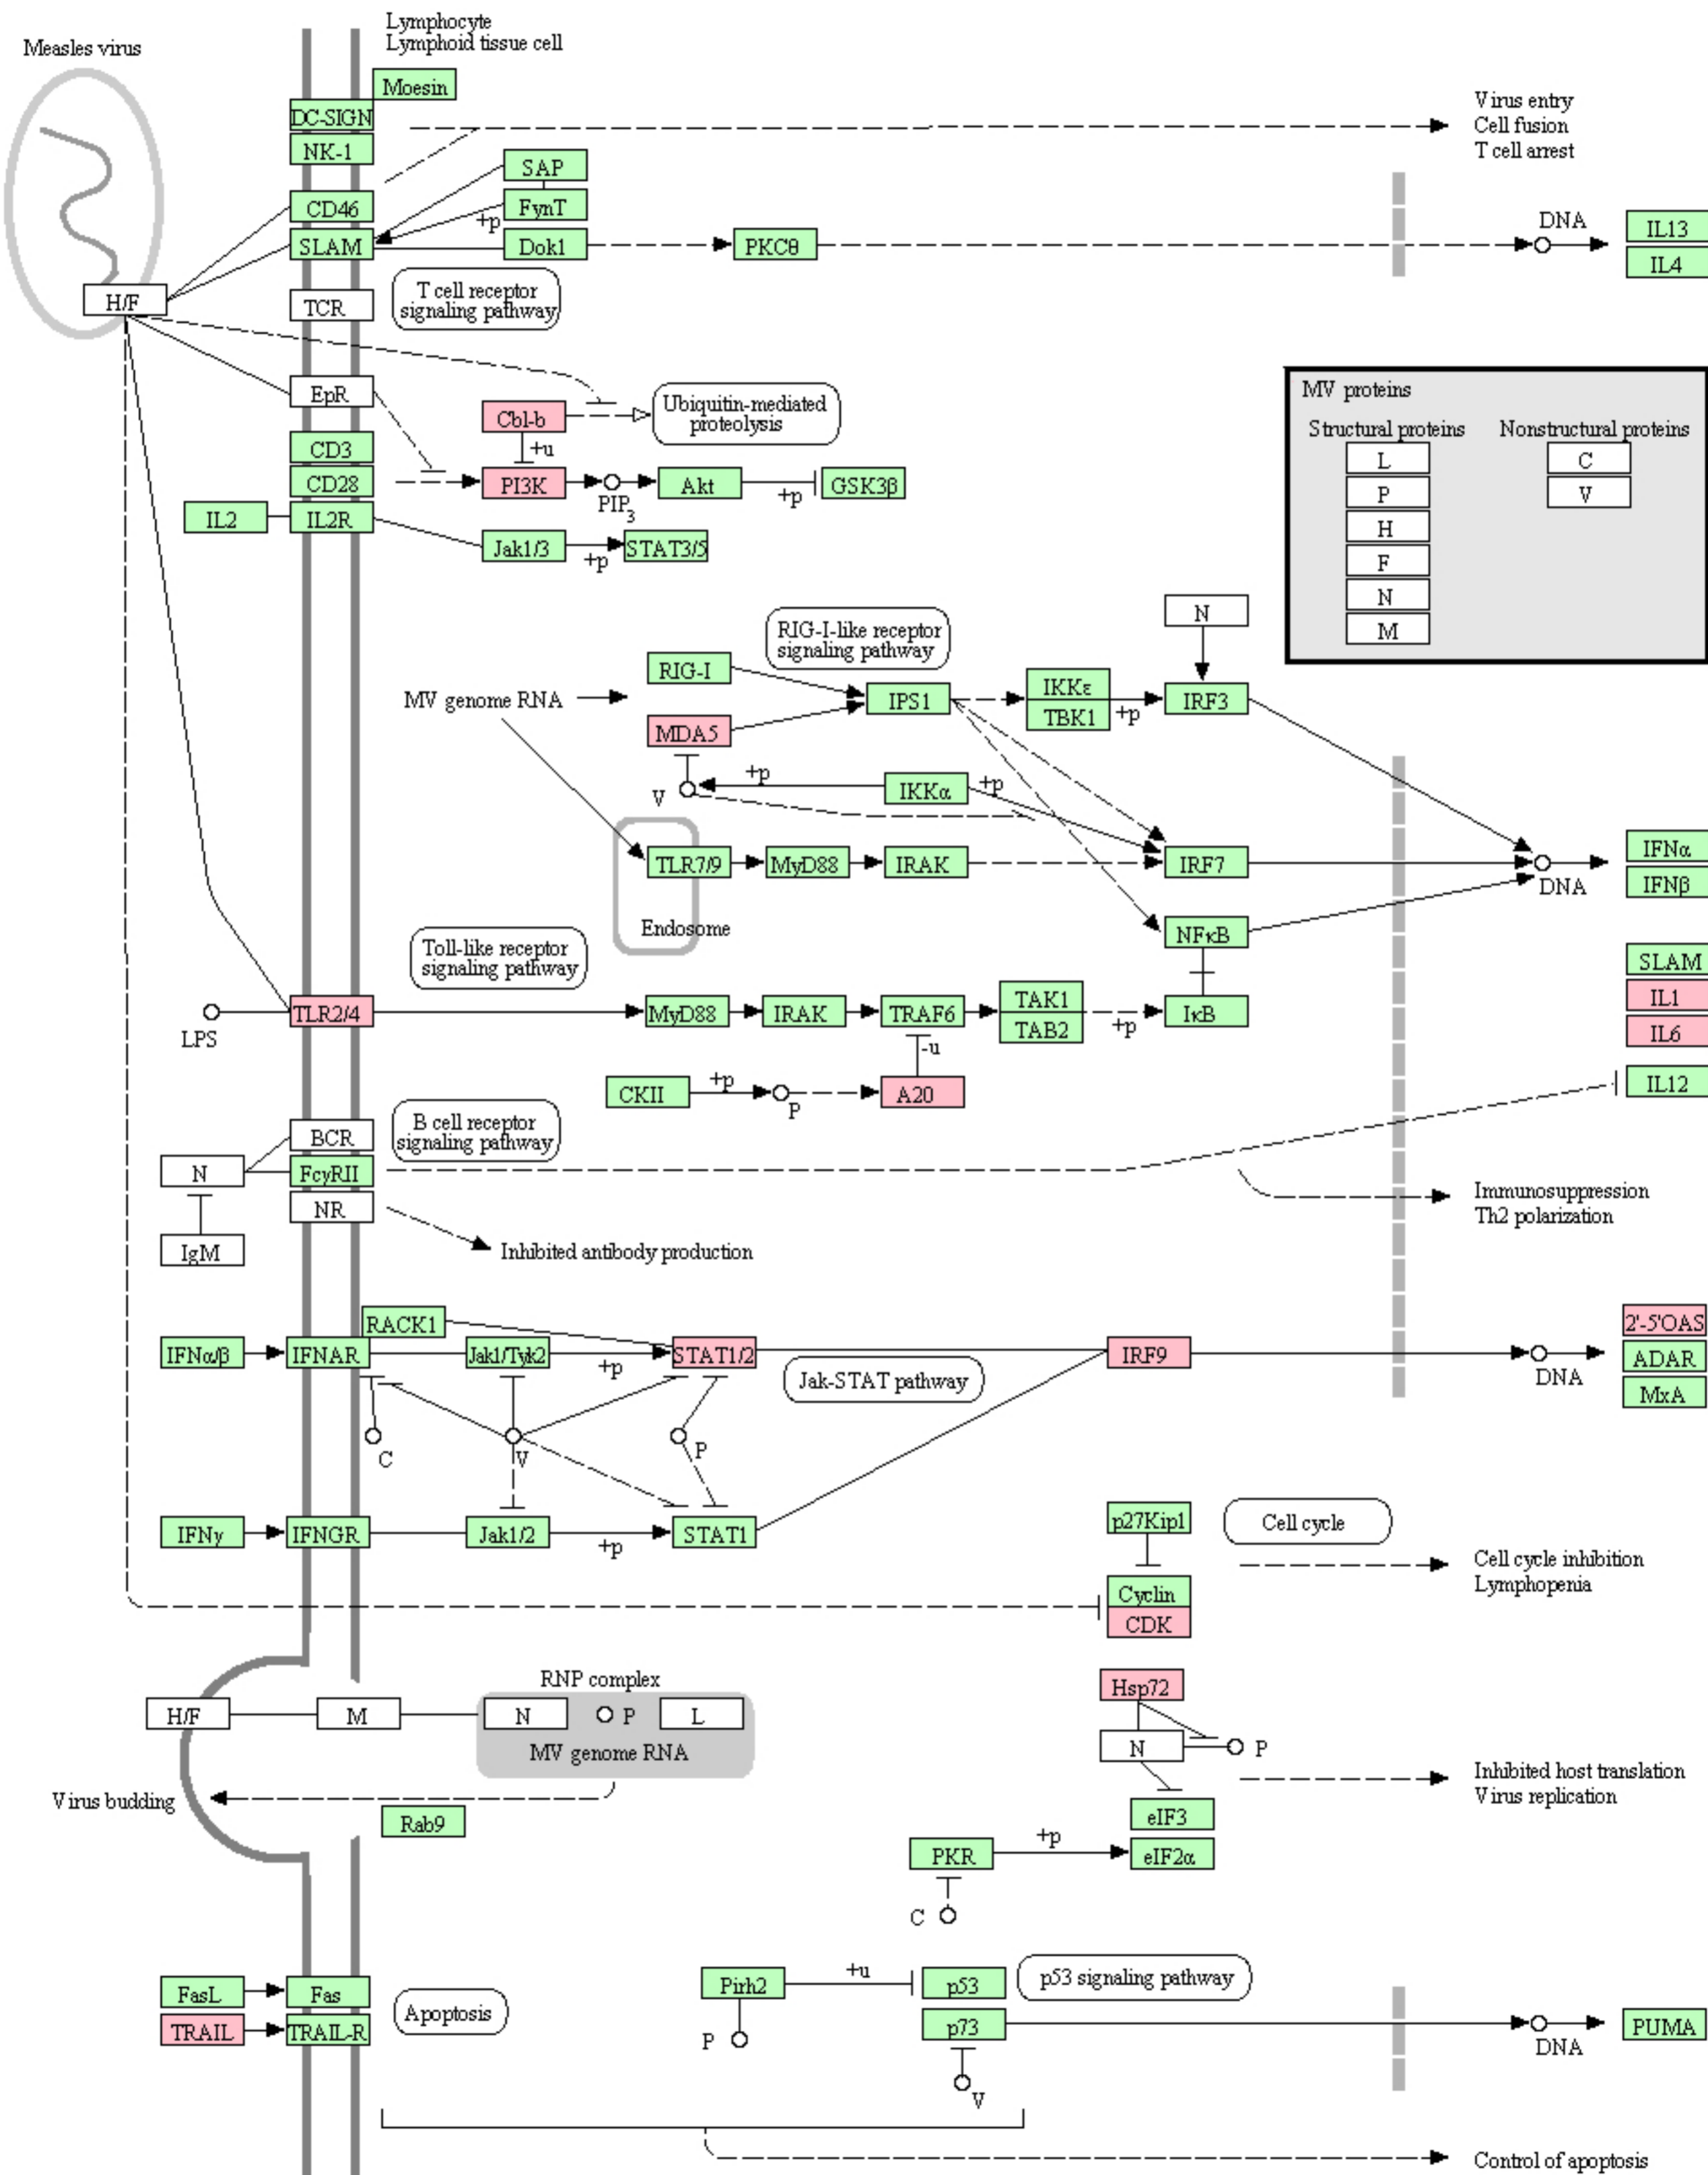

Influenza A

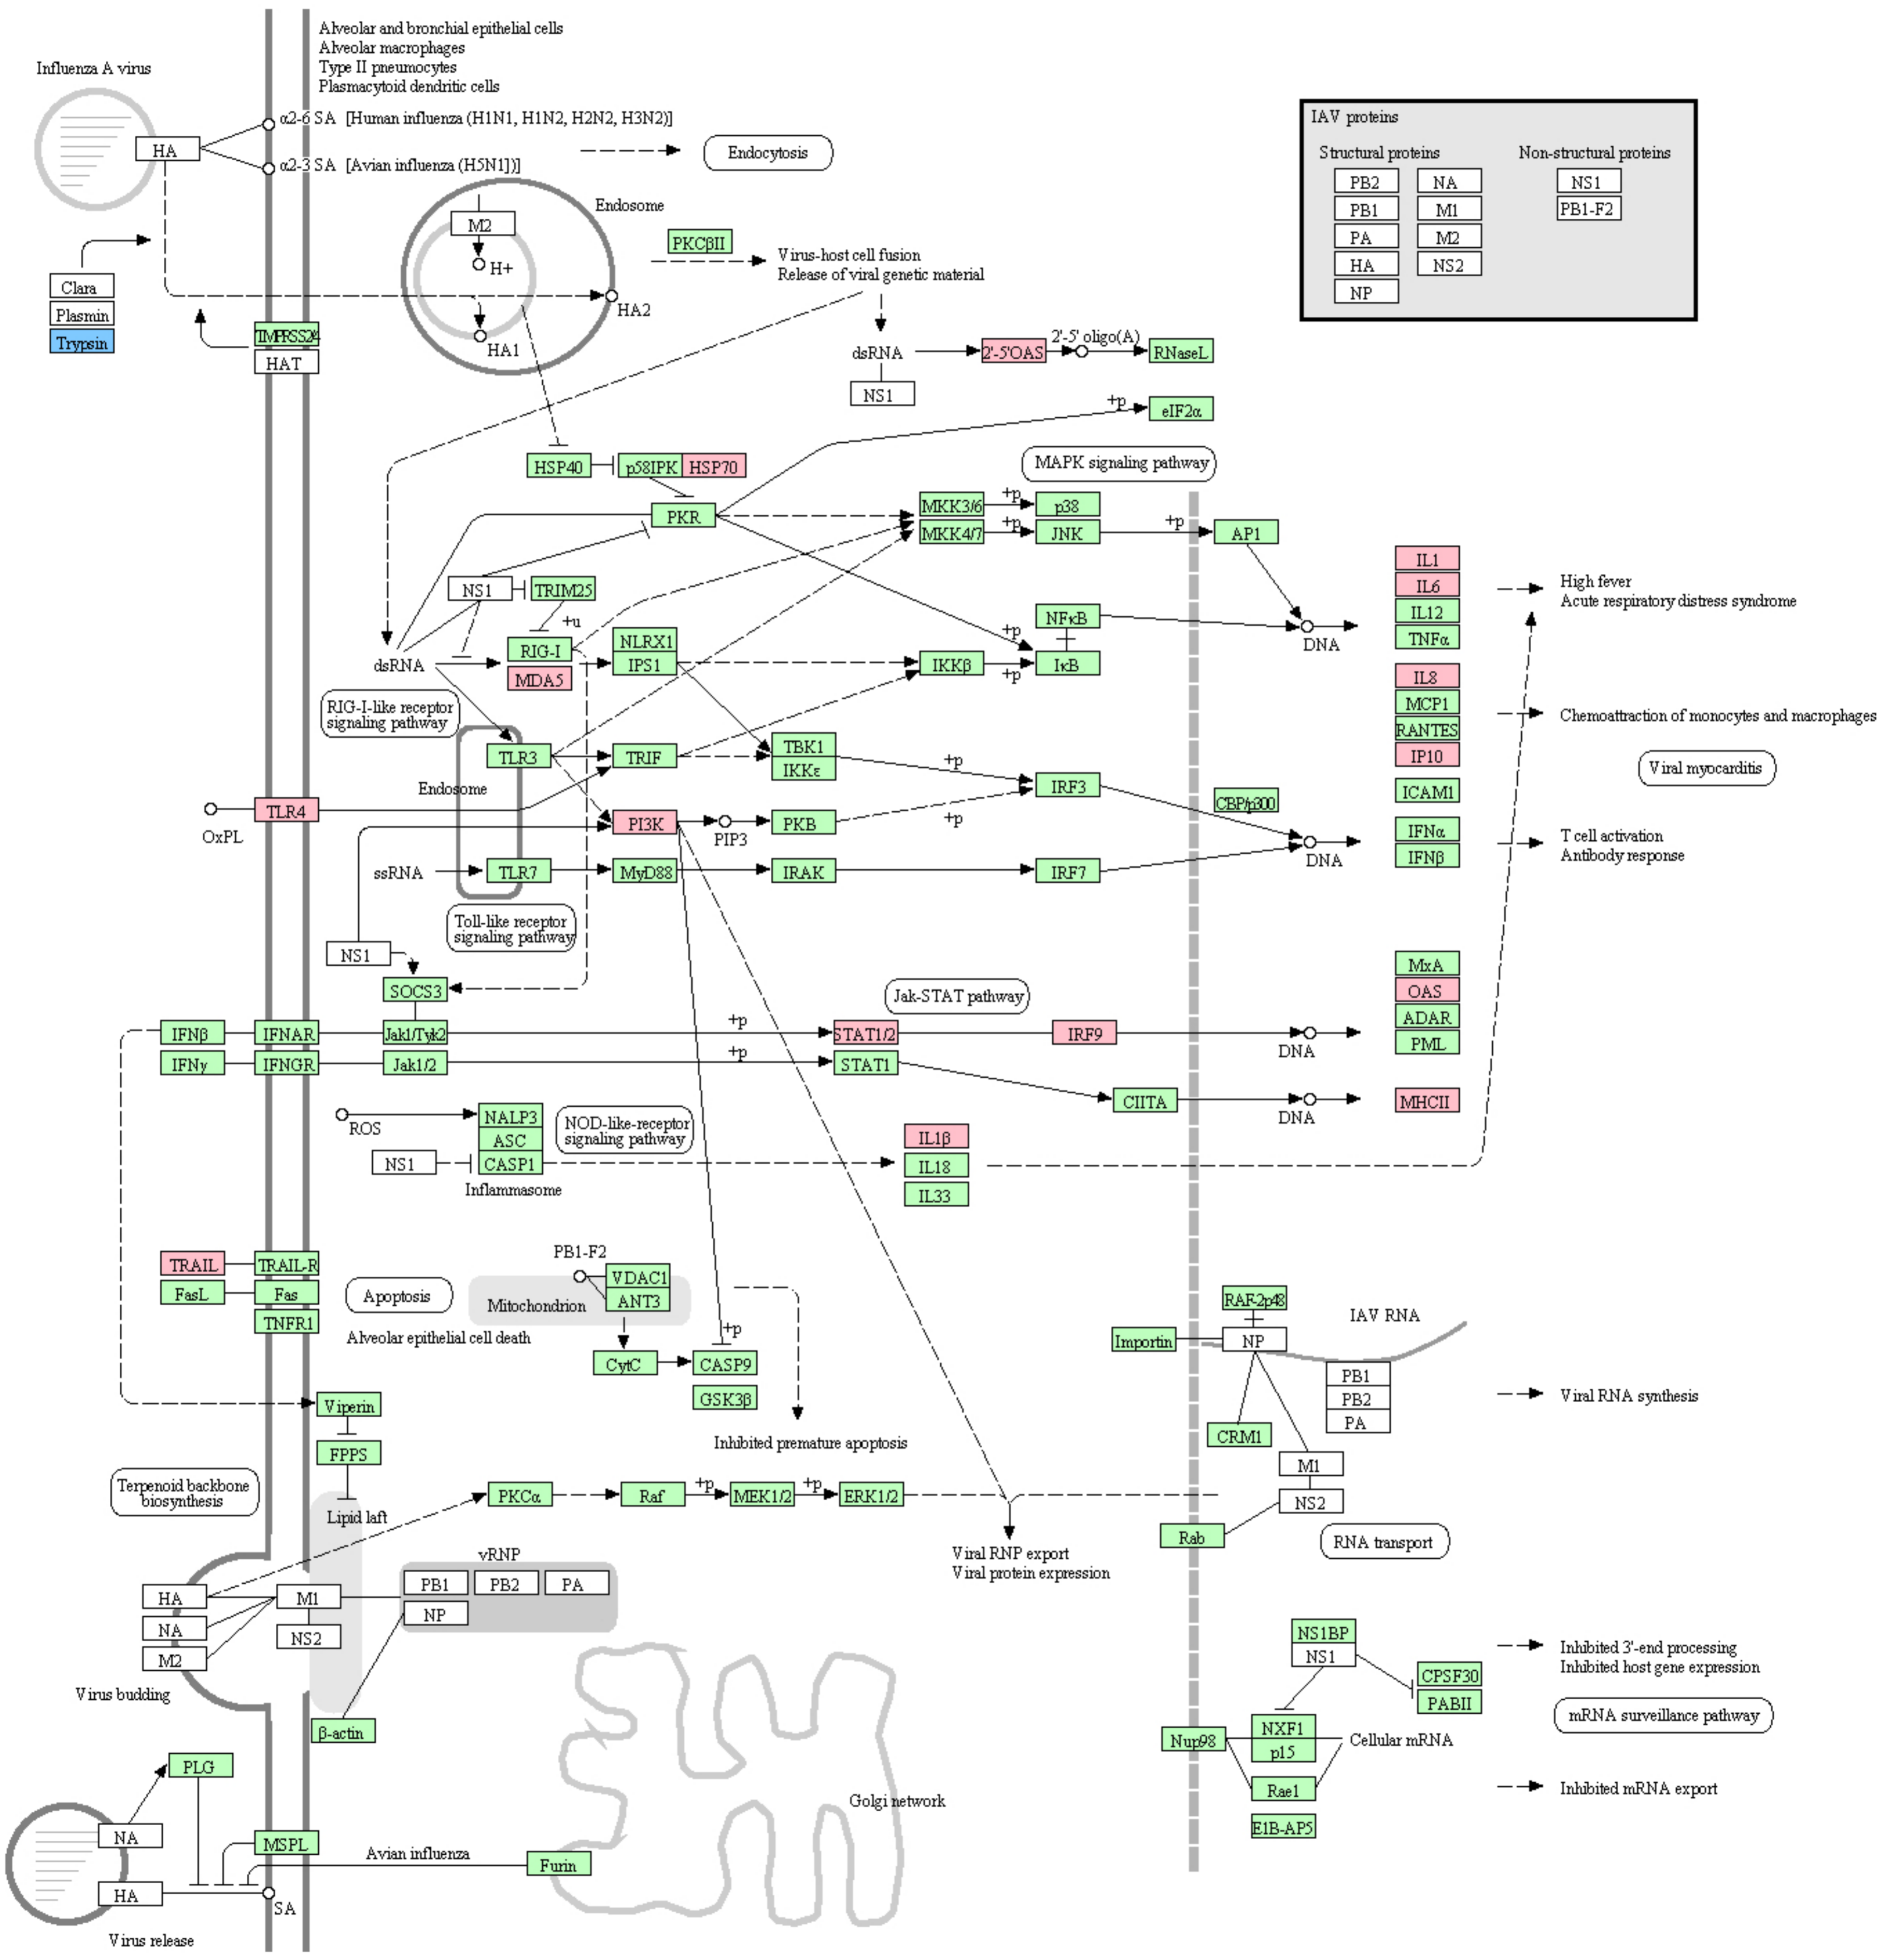

Rheumatoid Arthritis

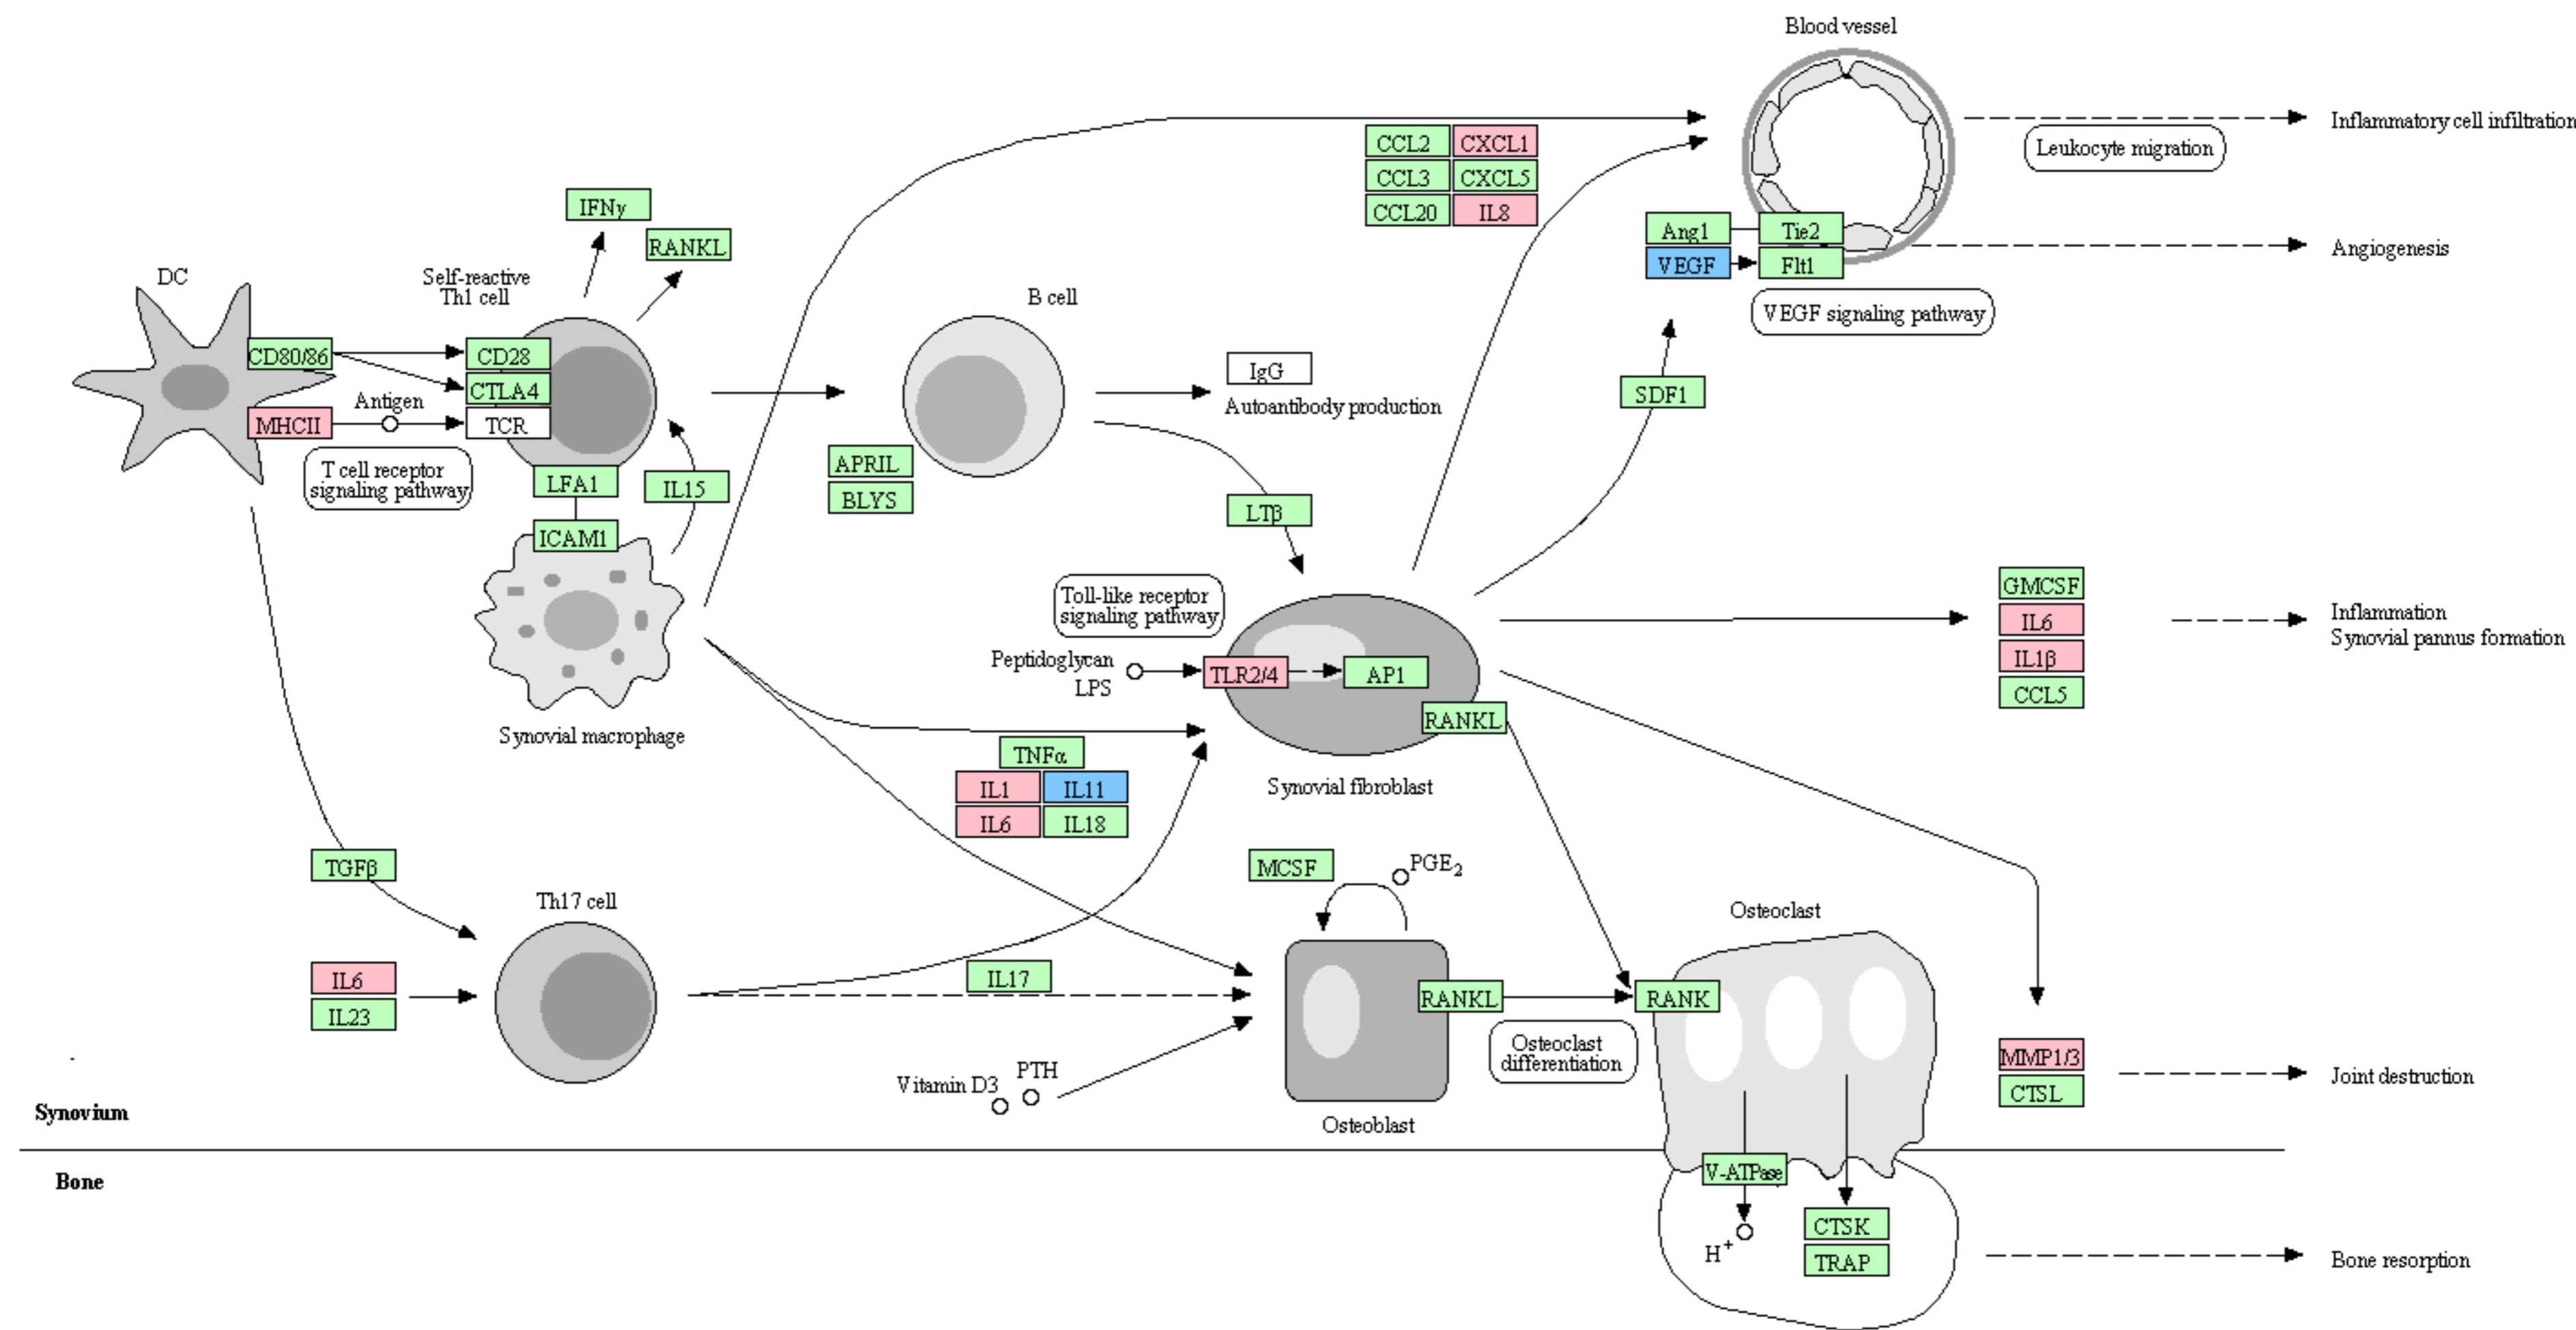

Supplement: Supplementary file 1 [file ijms-19-01451-s001.zip › Supplementary Figure 1.pdf]
