# Supplementary material for: SOX7 Target Genes and Their Contribution to Its Tumor Suppressive Function
Source: Int J Mol Sci. 2018 May 14;19(5):1451. doi: 10.3390/ijms19051451 (PMC5983648; doi:10.3390/ijms19051451)
Supplement: Supplementary file 1 [file ijms-19-01451-s001.zip]

Archive with 6 entries (6 files):
- Supplementary Figure 2.pdf
- Supplementary Figure 3.pdf
- Supplementary Table 1.docx
- Supplementary Table 2.xlsx
- Supplementary Table 3.docx
- Supplementary Figure 1.pdf
