# Supplementary material for: SOX7 Target Genes and Their Contribution to Its Tumor Suppressive Function
Source: Int J Mol Sci. 2018 May 14;19(5):1451. doi: 10.3390/ijms19051451 (PMC5983648; doi:10.3390/ijms19051451)
Supplement: Supplementary file 1 [file ijms-19-01451-s001.zip › Supplementary Table 2.xlsx]

## Sheet: 6hr
GENELIST_NAME	EXPID	GENEBANK ACC	GENE NAME	LOCUSID	FOLD	PVALUE	GEN_ID_MFR	SPOTID	REFSEQ
6hr Induction Genes 2.0x	12017	NM_002729	HHEX	3087	7.2627	0.002	11722321_at	22488807	NM_002729
6hr Induction Genes 2.0x	12017	AB033089	FSTL5	56884	6.671	0	11743826_at	22510312	NM_001128427
6hr Induction Genes 2.0x	12017	NM_006403	NEDD9	4739	6.1742	0	11725057_s_at	22491543	NM_001142393
6hr Induction Genes 2.0x	12017	NM_001955	EDN1	1906	5.8491	0	11726024_at	22492510	NM_001168319			After deleting repeated "REFSEQ", upregulated genes: 102 downregulated genes: 83
6hr Induction Genes 2.0x	12017	NM_000576	IL1B	3553	5.4928	0.0026	11719916_at	22486402	NM_000576
6hr Induction Genes 2.0x	12017	NM_002214	ITGB8	3696	5.4821	0.0016	11722503_at	22488989	NM_002214
6hr Induction Genes 2.0x	12017	BC009720	EDN1	1906	5.2982	0.0006	11726023_a_at	22492509	NM_001168319
6hr Induction Genes 2.0x	12017	M99435	TLE1	7088	5.0127	0.0001	11740414_a_at	22506900	NM_005077
6hr Induction Genes 2.0x	12017	NM_014059	RGCC	28984	4.8165	0.0004	11717582_a_at	22484068	NM_014059
6hr Induction Genes 2.0x	12017	NM_173490	TMEM171	134285	4.6932	0.0014	11732818_at	22499304	NM_001161342
6hr Induction Genes 2.0x	12017	NM_001145671	SORBS2	8470	4.4613	0.0003	11735570_a_at	22502056	NM_001145670
6hr Induction Genes 2.0x	12017	AK225812	SORBS2	8470	4.4463	0	11740326_x_at	22506812	NM_001145670
6hr Induction Genes 2.0x	12017	CR541824	SCG5	6447	4.0506	0.0001	11742698_at	22509184	NM_001144757
6hr Induction Genes 2.0x	12017	BC011883	SORBS2	8470	3.9592	0	11735572_x_at	22502058	NM_001145670
6hr Induction Genes 2.0x	12017	NM_005604	POU3F2	5454	3.8132	0.001	11733520_at	22500006	NM_005604
6hr Induction Genes 2.0x	12017	AF104266	LPHN2	23266	3.6209	0.0026	11745273_a_at	22511759	NM_012302
6hr Induction Genes 2.0x	12017	NM_000325	PITX2	5308	3.6105	0.0026	11729935_a_at	22496421	NM_000325
6hr Induction Genes 2.0x	12017	NM_014951	ZNF365	22891	3.5889	0	11731263_a_at	22497749	NM_014951
6hr Induction Genes 2.0x	12017	NM_058229	FBXO32	114907	3.5402	0	11719394_a_at	22485880	NM_001242463
6hr Induction Genes 2.0x	12017	AK302527	IFI44	10561	3.4652	0.0003	11748003_a_at	22514489	NM_006417
6hr Induction Genes 2.0x	12017	BX537388	PIK3R3	8503	3.436	0.0002	11754316_a_at	22520802	NM_001114172
6hr Induction Genes 2.0x	12017	AK293357	RARRES3	5920	3.4162	0.0003	11748907_a_at	22515393	NM_004585
6hr Induction Genes 2.0x	12017	AW150758	DDX60	55601	3.3786	0.0001	11744236_a_at	22510722	NM_017631
6hr Induction Genes 2.0x	12017	AI479863	SIPA1L2	57568	3.3779	0.001	11744184_a_at	22510670	NM_020808
6hr Induction Genes 2.0x	12017	DB350079	IFI44	10561	3.3711	0.0003	11746088_a_at	22512574	NM_006417
6hr Induction Genes 2.0x	12017	NM_006417	IFI44	10561	3.2845	0.005	11719886_a_at	22486372	NM_006417
6hr Induction Genes 2.0x	12017	NM_206921	CEP85L	387119	3.2829	0.0043	11740806_a_at	22507292	NM_001042475
6hr Induction Genes 2.0x	12017	BE464297	S1PR1	1901	3.1759	0.0124	11743816_s_at	22510302	NM_001400
6hr Induction Genes 2.0x	12017	BC073163	GBP2	2634	3.1598	0.0025	11719447_s_at	22485933	NM_004120
6hr Induction Genes 2.0x	12017	AL832451	GBP2	2634	3.152	0.001	11762406_s_at	22528892	NM_004120
6hr Induction Genes 2.0x	12017	BT007067	IL8	3576	3.1193	0.0002	11754026_a_at	22520512	NM_000584
6hr Induction Genes 2.0x	12017	NM_006557	DMRT2	10655	3.0482	0.0001	11727728_a_at	22494214	NM_001130865
6hr Induction Genes 2.0x	12017	NM_032199	ARID5B	84159	3.0458	0.0003	11718927_a_at	22485413	NM_001244638
6hr Induction Genes 2.0x	12017	NM_022168	IFIH1	64135	3.0435	0.0004	11724346_a_at	22490832	NM_022168
6hr Induction Genes 2.0x	12017	NM_002600	PDE4B	5142	3.0306	0.0118	11724095_a_at	22490581	NM_001037339
6hr Induction Genes 2.0x	12017	CR596199	LPHN2	23266	3.0134	0.0004	11743568_a_at	22510054	NM_012302
6hr Induction Genes 2.0x	12017	CF529882	TLR4	7099	3.0103	0.0137	11743197_at	22509683	NM_003266
6hr Induction Genes 2.0x	12017	NM_015123	FRMD4B	23150	2.9761	0.0055	11731574_at	22498060	NM_015123
6hr Induction Genes 2.0x	12017	BC011883	SORBS2	8470	2.9698	0.0007	11735571_a_at	22502057	NM_001145670
6hr Induction Genes 2.0x	12017	AK296461	SORBS2	8470	2.9573	0.0009	11741262_x_at	22507748	NM_001145670
6hr Induction Genes 2.0x	12017	NM_001723	DST /// LOC100652766	100652766	2.9128	0	11727655_s_at	22494141	NM_001144769
6hr Induction Genes 2.0x	12017	CR610618	MAML2	84441	2.8829	0.0004	11759346_a_at	22525832	NM_032427
6hr Induction Genes 2.0x	12017	NM_013230	CD24	100133941	2.88	0.0011	11715918_s_at	22482404	NM_013230
6hr Induction Genes 2.0x	12017	BT007067	IL8	3576	2.854	0	11763226_x_at	22529712	NM_000584
6hr Induction Genes 2.0x	12017	BU675268	ANXA8 /// ANXA8L1 /// ANXA8L2	244	2.8028	0.0015	11757396_s_at	22523882	NM_001039801
6hr Induction Genes 2.0x	12017	NM_001143942	RBM24	221662	2.7831	0.0005	11728873_s_at	22495359	NM_001143941
6hr Induction Genes 2.0x	12017	AK300068	RBM24	221662	2.7791	0.0005	11751308_a_at	22517794	NM_001143941
6hr Induction Genes 2.0x	12017	NM_025237	SOST	50964	2.7143	0.0026	11727328_at	22493814	NM_025237
6hr Induction Genes 2.0x	12017	AK302591	CEP85L	387119	2.7134	0.0141	11747163_a_at	22513649	NM_001042475
6hr Induction Genes 2.0x	12017	NM_001511	CXCL1	2919	2.712	0.0003	11719366_s_at	22485852	NM_001511
6hr Induction Genes 2.0x	12017	NM_004396	DDX5	1655	2.6854	0.0024	11733798_at	22500284	NM_004396
6hr Induction Genes 2.0x	12017	NM_002820	PTHLH	5744	2.6577	0.0028	11731897_a_at	22498383	NM_002820
6hr Induction Genes 2.0x	12017	NM_018018	SLC38A4	55089	2.6461	0.0004	11725512_a_at	22491998	NM_001143824
6hr Induction Genes 2.0x	12017	BF185501	SCD	6319	2.6159	0.0006	11756174_s_at	22522660	NM_005063
6hr Induction Genes 2.0x	12017	NM_000584	IL8	3576	2.595	0	11718841_s_at	22485327	NM_000584
6hr Induction Genes 2.0x	12017	AK055922	CDK6	1021	2.5834	0.0029	11723241_at	22489727	NM_001145306
6hr Induction Genes 2.0x	12017	NM_002849	PTPRR	5801	2.5823	0.0004	11728787_a_at	22495273	NM_001207015
6hr Induction Genes 2.0x	12017	NM_017563	IL17RD	54756	2.5678	0.0052	11723173_at	22489659	NM_017563
6hr Induction Genes 2.0x	12017	AK129873	ADAMTS1	9510	2.5065	0.0014	11754662_s_at	22521148	NM_006988
6hr Induction Genes 2.0x	12017	NM_000379	XDH	7498	2.5062	0.0018	11733464_at	22499950	NM_000379
6hr Induction Genes 2.0x	12017	AL833262	SYNM	23336	2.4678	0.0005	11755757_a_at	22522243	NM_015286
6hr Induction Genes 2.0x	12017	NM_003107	SOX4	6659	2.4606	0.0001	11719562_at	22486048	NM_003107
6hr Induction Genes 2.0x	12017	DB308423	CEP85L	387119	2.4581	0.0001	11759323_at	22525809	NM_001042475
6hr Induction Genes 2.0x	12017	NM_022475	HHIP	64399	2.4566	0.0093	11736086_a_at	22502572	NM_022475
6hr Induction Genes 2.0x	12017	NM_003641	IFITM1	8519	2.4527	0.0054	11715670_a_at	22482156	NM_003641
6hr Induction Genes 2.0x	12017	NM_003914	CCNA1	8900	2.4329	0	11732350_a_at	22498836	NM_001111045
6hr Induction Genes 2.0x	12017	L43821	NEDD9	4739	2.4192	0.0259	11725058_a_at	22491544	NM_001142393
6hr Induction Genes 2.0x	12017	AL832572	MOB3B	79817	2.4086	0.0061	11725168_s_at	22491654	NM_024761
6hr Induction Genes 2.0x	12017	AK302651	PDP1	54704	2.4046	0.0038	11747314_a_at	22513800	NM_001161778
6hr Induction Genes 2.0x	12017	NM_017839	LPCAT2	54947	2.3994	0.001	11725417_a_at	22491903	NM_017839
6hr Induction Genes 2.0x	12017	NM_152754	SEMA3D	223117	2.3965	0.0008	11731195_at	22497681	NM_152754
6hr Induction Genes 2.0x	12017	NM_004335	BST2	684	2.3904	0.0003	11716036_x_at	22482522	NM_004335
6hr Induction Genes 2.0x	12017	BM682674	MAB21L1	4081	2.3694	0.0002	11743770_at	22510256	NM_005584
6hr Induction Genes 2.0x	12017	BM979794	ST3GAL6	10402	2.363	0.0123	11743839_a_at	22510325	NM_006100
6hr Induction Genes 2.0x	12017	NM_023112	OTUB2	78990	2.3617	0	11725832_s_at	22492318	NM_023112
6hr Induction Genes 2.0x	12017	AK299139	PKP2	5318	2.3453	0.0009	11726130_a_at	22492616	NM_001005242
6hr Induction Genes 2.0x	12017	BX449937	HSPA1A /// HSPA1B	3303	2.3322	0.0003	11757907_x_at	22524393	NM_005345
6hr Induction Genes 2.0x	12017	AK301220	IL7R	3575	2.3302	0.0017	11751647_a_at	22518133	NM_002185
6hr Induction Genes 2.0x	12017	DB308423	CEP85L	387119	2.3293	0.0004	11759324_s_at	22525810	NM_001042475
6hr Induction Genes 2.0x	12017	NM_001042475	CEP85L	387119	2.326	0.0134	11739888_at	22506374	NM_001042475
6hr Induction Genes 2.0x	12017	NM_023112	OTUB2	78990	2.3223	0	11725831_at	22492317	NM_023112
6hr Induction Genes 2.0x	12017	NM_018444	PDP1	54704	2.3177	0.0048	11722231_at	22488717	NM_001161778
6hr Induction Genes 2.0x	12017	AL832194	S1PR3	1903	2.3166	0.0004	11725905_a_at	22492391	NM_005226
6hr Induction Genes 2.0x	12017	AK299731	RND3	390	2.3124	0.0051	11753427_a_at	22519913	NM_001254738
6hr Induction Genes 2.0x	12017	BC098343	PDP1	54704	2.3092	0.0005	11722230_a_at	22488716	NM_001161778
6hr Induction Genes 2.0x	12017	NM_003022	SH3BGRL	6451	2.3023	0.0017	11715624_at	22482110	NM_003022
6hr Induction Genes 2.0x	12017	AU147415	FRMD4B	23150	2.2876	0.0001	11731573_a_at	22498059	NM_015123
6hr Induction Genes 2.0x	12017	NM_030915	LBH	81606	2.2788	0.0004	11716162_at	22482648	NM_030915
6hr Induction Genes 2.0x	12017	NM_003641	IFITM1	8519	2.27	0.0004	11715671_x_at	22482157	NM_003641
6hr Induction Genes 2.0x	12017	NM_020167	NMUR2	56923	2.268	0.0028	11729497_at	22495983	NM_020167
6hr Induction Genes 2.0x	12017	NM_032587	CARD6	84674	2.2501	0.0018	11728617_at	22495103	NM_032587
6hr Induction Genes 2.0x	12017	AK024645	HHIP	64399	2.25	0.0069	11756007_a_at	22522493	NM_022475
6hr Induction Genes 2.0x	12017	BE464297	S1PR1	1901	2.2495	0.001	11743815_a_at	22510301	NM_001400
6hr Induction Genes 2.0x	12017	AA166678	SIPA1L2	57568	2.2487	0.0003	11757924_s_at	22524410	NM_020808
6hr Induction Genes 2.0x	12017	AK293052	RBM24	221662	2.2457	0.0003	11728872_a_at	22495358	NM_001143941
6hr Induction Genes 2.0x	12017	AK074930	ATP10D	57205	2.2437	0.0008	11739489_a_at	22505975	NM_020453
6hr Induction Genes 2.0x	12017	BC036773	OPN3	23596	2.2299	0.0054	11744481_s_at	22510967	NM_001030011
6hr Induction Genes 2.0x	12017	BX099164	FZD8	8325	2.2256	0.0003	11758064_s_at	22524550	NM_031866
6hr Induction Genes 2.0x	12017	NM_014707	HDAC9	9734	2.2174	0.0001	11728076_at	22494562	NM_001204144
6hr Induction Genes 2.0x	12017	AI249114	CXADR	1525	2.2143	0.0089	11758000_s_at	22524486	NM_001207063
6hr Induction Genes 2.0x	12017	NM_001338	CXADR	1525	2.2127	0.0032	11720637_x_at	22487123	NM_001207063
6hr Induction Genes 2.0x	12017	NM_152737	RNF182	221687	2.2113	0.0003	11737774_a_at	22504260	NM_001165032
6hr Induction Genes 2.0x	12017	NM_000963	PTGS2	5743	2.2107	0.0019	11724037_at	22490523	NM_000963
6hr Induction Genes 2.0x	12017	NM_005302	GPR37	2861	2.2079	0.0001	11737992_s_at	22504478	NM_005302
6hr Induction Genes 2.0x	12017	BF678927	SOX4	6659	2.2017	0	11719561_s_at	22486047	NM_003107
6hr Induction Genes 2.0x	12017	BX648278	FOXO1	2308	2.1935	0	11755772_a_at	22522258	NM_002015
6hr Induction Genes 2.0x	12017	AK303900	CAST	831	2.1804	0.0015	11750050_a_at	22516536	NM_001042440
6hr Induction Genes 2.0x	12017	AF244577	SLC17A5	26503	2.1794	0.0081	11752119_x_at	22518605	NM_012434
6hr Induction Genes 2.0x	12017	AY082381	NOV	4856	2.174	0.0001	11723033_at	22489519	NM_002514
6hr Induction Genes 2.0x	12017	NM_020182	PMEPA1	56937	2.1735	0.0002	11716149_a_at	22482635	NM_001255976
6hr Induction Genes 2.0x	12017	U06117	XDH	7498	2.172	0.0012	11733465_at	22499951	NM_000379
6hr Induction Genes 2.0x	12017	BF678927	SOX4	6659	2.1654	0.0013	11719560_at	22486046	NM_003107
6hr Induction Genes 2.0x	12017	CB052020	ARID5B	84159	2.1561	0.001	11718926_a_at	22485412	NM_001244638
6hr Induction Genes 2.0x	12017	AV682654	CFH /// CFHR1	3075	2.1557	0.0114	11757990_s_at	22524476	NM_000186
6hr Induction Genes 2.0x	12017	BC069999	IL7R	3575	2.1547	0.0006	11733187_a_at	22499673	NM_002185
6hr Induction Genes 2.0x	12017	U87460	GPR37	2861	2.1472	0.0012	11751962_s_at	22518448	NM_005302
6hr Induction Genes 2.0x	12017	NM_000877	IL1R1	3554	2.1393	0.0002	11718025_at	22484511	NM_000877
6hr Induction Genes 2.0x	12017	NM_001077427	LYPD1	116372	2.1363	0.0014	11741122_a_at	22507608	NM_001077427
6hr Induction Genes 2.0x	12017	NM_004335	BST2	684	2.1319	0.0008	11716034_a_at	22482520	NM_004335
6hr Induction Genes 2.0x	12017	BC104808	RBM24	221662	2.1255	0.0038	11738153_x_at	22504639	NM_001143941
6hr Induction Genes 2.0x	12017	BC013734	PTGS2	5743	2.112	0.0022	11724038_a_at	22490524	NM_000963
6hr Induction Genes 2.0x	12017	AF138863	ZC3HAV1	56829	2.1105	0.0004	11756839_x_at	22523325	NM_020119
6hr Induction Genes 2.0x	12017	W92993	RHOJ	57381	2.1081	0.0079	11759345_at	22525831	NM_020663
6hr Induction Genes 2.0x	12017	NM_032857	LACTB	114294	2.1073	0	11721387_at	22487873	NM_032857
6hr Induction Genes 2.0x	12017	NM_003733	OASL	8638	2.1004	0.0035	11726364_x_at	22492850	NM_001261825
6hr Induction Genes 2.0x	12017	BC004205	SPRY2	10253	2.0983	0.0002	11753988_a_at	22520474	NM_005842
6hr Induction Genes 2.0x	12017	U34038	F2RL1	2150	2.0982	0.0003	11728827_at	22495313	NM_005242
6hr Induction Genes 2.0x	12017	AW139567	THBS1	7057	2.0954	0.0043	11758842_at	22525328	NM_003246
6hr Induction Genes 2.0x	12017	J03802	PTHLH	5744	2.0906	0.0003	11740245_a_at	22506731	NM_002820
6hr Induction Genes 2.0x	12017	NM_153267	MAMDC2	256691	2.0897	0.0019	11734418_s_at	22500904	NM_153267
6hr Induction Genes 2.0x	12017	NM_004585	RARRES3	5920	2.0879	0.0138	11719692_a_at	22486178	NM_004585
6hr Induction Genes 2.0x	12017	BC012787	RBM12	10137	2.0791	0.0002	11719925_a_at	22486411	NM_001198838
6hr Induction Genes 2.0x	12017	AI274876	SOX4	6659	2.073	0.0013	11758525_s_at	22525011	NM_003107
6hr Induction Genes 2.0x	12017	NM_004335	BST2	684	2.0423	0.0133	11716035_at	22482521	NM_004335
6hr Induction Genes 2.0x	12017	NM_004787	SLIT2	9353	2.0408	0	11721399_a_at	22487885	NM_004787
6hr Induction Genes 2.0x	12017	M60334	HLA-DRA	3122	2.039	0.0003	11742850_x_at	22509336	NM_019111
6hr Induction Genes 2.0x	12017	BU686994	NUAK1	9891	2.0376	0.0001	11739973_s_at	22506459	NM_014840
6hr Induction Genes 2.0x	12017	NM_001343	DAB2	1601	2.037	0.001	11722355_s_at	22488841	NM_001244871
6hr Induction Genes 2.0x	12017	NM_001005242	PKP2	5318	2.0319	0.0001	11726131_a_at	22492617	NM_001005242
6hr Induction Genes 2.0x	12017	AK296921	ARID5B	84159	2.0266	0.0033	11750222_a_at	22516708	NM_001244638
6hr Induction Genes 2.0x	12017	BC032866	EIF5	1983	2.0225	0	11741224_s_at	22507710	NM_001969
6hr Induction Genes 2.0x	12017	BM563260	LOC100652751 /// LOC100653313 /// SCD	100652751	2.0207	0.0054	11715562_x_at	22482048	NM_005063
6hr Induction Genes 2.0x	12017	AK295398	HSPA1A /// HSPA1B	3303	2.0133	0.0039	11750411_x_at	22516897	NM_005345
6hr Induction Genes 2.0x	12017	CX163686	EIF5	1983	2.0112	0.0006	11724726_s_at	22491212	NM_001969
6hr Induction Genes 2.0x	12017	AK296461	SORBS2	8470	2.0105	0.0033	11741261_a_at	22507747	NM_001145670
6hr Induction Genes 2.0x	12017	CA448065	PMEPA1	56937	2.0072	0.0001	11716151_a_at	22482637	NM_001255976
6hr Induction Genes 2.0x	12017	NM_006033	LIPG	9388	2.004	0.0021	11725469_at	22491955	NM_006033
6hr Induction Genes 2.0x	12017	CR591353	LOX	4015	2.0036	0.0314	11758995_at	22525481	NM_001178102
6hr Induction Genes 2.0x	12017	AK098525	HHIP	64399	2.0028	0.0001	11754706_a_at	22521192	NM_022475
6hr Induction Genes 2.0x	12017	BU741622	RBM12	10137	2.0019	0.0048	11719924_a_at	22486410	NM_001198838
6hr Induction Genes 2.0x	12017	NM_003811	TNFSF9	8744	2.0013	0.0004	11735140_at	22501626	NM_003811
6hr Induction Genes 2.0x	12017	BC152448	LPIN2	9663	0.4982	0.0034	11744150_s_at	22510636	NM_014646
6hr Induction Genes 2.0x	12017	AY359239	FBXL13	222235	0.4944	0.0027	11740804_a_at	22507290	NM_001111038
6hr Induction Genes 2.0x	12017	NM_019034	RHOF	54509	0.4935	0.0015	11724562_x_at	22491048	NM_019034
6hr Induction Genes 2.0x	12017	NM_015440	MTHFD1L	25902	0.4929	0.0001	11728986_x_at	22495472	NM_001242767
6hr Induction Genes 2.0x	12017	NM_017754	UHRF1BP1	54887	0.4906	0	11728426_s_at	22494912	NM_017754
6hr Induction Genes 2.0x	12017	AK095364	C9orf91	203197	0.49	0.0241	11726752_at	22493238	NM_153045
6hr Induction Genes 2.0x	12017	AF287261	SETD8	387893	0.4897	0.0092	11748270_s_at	22514756	NM_020382
6hr Induction Genes 2.0x	12017	U70663	KLF4	9314	0.4886	0.003	11719633_a_at	22486119	NM_004235
6hr Induction Genes 2.0x	12017	NM_013275	ANKRD11	29123	0.4869	0.0003	11727065_s_at	22493551	NM_001256182
6hr Induction Genes 2.0x	12017	NM_001040619	ATF3	467	0.4851	0.019	11719344_a_at	22485830	NM_001030287
6hr Induction Genes 2.0x	12017	AY702027	CHAC1	79094	0.4849	0.0041	11742287_a_at	22508773	NM_001142776
6hr Induction Genes 2.0x	12017	NM_153256	C10orf47	254427	0.4848	0.0007	11728844_at	22495330	NM_153256
6hr Induction Genes 2.0x	12017	NM_153006	NAGS	162417	0.4847	0.0102	11727324_at	22493810	NM_153006
6hr Induction Genes 2.0x	12017	NM_030674	SLC38A1	81539	0.4845	0	11717103_s_at	22483589	NM_001077484
6hr Induction Genes 2.0x	12017	NM_206999	CNOT1	23019	0.482	0.025	11730655_a_at	22497141	NM_001265612
6hr Induction Genes 2.0x	12017	AK130092	LARP6	55323	0.4816	0.0002	11755709_s_at	22522195	NM_018357
6hr Induction Genes 2.0x	12017	BC034991	MNS1	55329	0.481	0.0017	11729258_at	22495744	NM_018365
6hr Induction Genes 2.0x	12017	AK056699	FYN	2534	0.4792	0.0008	11754587_a_at	22521073	NM_001242779
6hr Induction Genes 2.0x	12017	BE964833	GARS	2617	0.479	0	11757855_a_at	22524341	NM_002047
6hr Induction Genes 2.0x	12017	BC034968	AJUBA	84962	0.4768	0.0002	11726013_a_at	22492499	NM_032876
6hr Induction Genes 2.0x	12017	NM_005628	SLC1A5	6510	0.4709	0.0003	11716866_x_at	22483352	NM_001145144
6hr Induction Genes 2.0x	12017	AY500353	VEGFA	7422	0.4704	0.0069	11755745_x_at	22522231	NM_001025366
6hr Induction Genes 2.0x	12017	AI636845	MARS	4141	0.4691	0.003	11744024_a_at	22510510	NM_004990
6hr Induction Genes 2.0x	12017	BC036476	STK31	56164	0.4672	0.0013	11754715_a_at	22521201	NM_001122833
6hr Induction Genes 2.0x	12017	NM_014615	KIAA0182	23199	0.4672	0.0013	11718307_a_at	22484793	NM_001134473
6hr Induction Genes 2.0x	12017	NM_003877	SOCS2	8835	0.4635	0.003	11735148_a_at	22501634	NM_001270467
6hr Induction Genes 2.0x	12017	AK075342	C12orf39	80763	0.4634	0.002	11759005_a_at	22525491	NM_030572
6hr Induction Genes 2.0x	12017	NM_004419	DUSP5	1847	0.4612	0.0012	11717863_a_at	22484349	NM_004419
6hr Induction Genes 2.0x	12017	BC007580	AJUBA	84962	0.4594	0	11745543_x_at	22512029	NM_032876
6hr Induction Genes 2.0x	12017	AK316546	SLC1A5	6510	0.459	0.0001	11740714_a_at	22507200	NM_001145144
6hr Induction Genes 2.0x	12017	NM_018357	LARP6	55323	0.4584	0.0013	11722417_a_at	22488903	NM_018357
6hr Induction Genes 2.0x	12017	AF113132	PSAT1	29968	0.4569	0.0022	11741479_a_at	22507965	NM_021154
6hr Induction Genes 2.0x	12017	AK292188	XBP1	7494	0.4564	0.0001	11729575_a_at	22496061	NM_001079539
6hr Induction Genes 2.0x	12017	BC112053	FKBP9 /// FKBP9L	11328	0.4564	0.0056	11717003_s_at	22483489	NM_007270
6hr Induction Genes 2.0x	12017	AK125072	SLC22A15	55356	0.4559	0.0007	11733955_at	22500441	NM_018420
6hr Induction Genes 2.0x	12017	AK302189	ASNS	440	0.4538	0.0001	11748793_a_at	22515279	NM_001178075
6hr Induction Genes 2.0x	12017	AF121775	ANKRD11	29123	0.4537	0	11727066_a_at	22493552	NM_001256182
6hr Induction Genes 2.0x	12017	NM_007270	FKBP9 /// FKBP9L	11328	0.4537	0.0032	11717004_s_at	22483490	NM_007270
6hr Induction Genes 2.0x	12017	AK292645	SETD8	387893	0.4536	0.0151	11748043_s_at	22514529	NM_020382
6hr Induction Genes 2.0x	12017	NM_013231	FLRT2 /// LOC100506718	100506718	0.4523	0.0028	11720433_s_at	22486919	NM_013231
6hr Induction Genes 2.0x	12017	AK095647	PLCXD2	257068	0.4512	0.0017	11743841_at	22510327	NM_001134478
6hr Induction Genes 2.0x	12017	BC062555	GPT2	84706	0.45	0.0019	11719161_a_at	22485647	NM_001142466
6hr Induction Genes 2.0x	12017	BC042008	ZEB1-AS1	220930	0.45	0.0037	11745924_at	22512410	NR_024284
6hr Induction Genes 2.0x	12017	NM_019096	GTPBP2	54676	0.4499	0.0005	11717184_a_at	22483670	NM_019096
6hr Induction Genes 2.0x	12017	BT006840	PSAT1	29968	0.4489	0.0057	11747349_s_at	22513835	NM_021154
6hr Induction Genes 2.0x	12017	AK289853	BDNF	627	0.4471	0.0003	11735902_a_at	22502388	NM_001143805
6hr Induction Genes 2.0x	12017	AK289438	FKBP9 /// FKBP9L	11328	0.4471	0.0018	11748346_s_at	22514832	NM_007270
6hr Induction Genes 2.0x	12017	NM_014210	EVI2A	2123	0.4447	0	11733841_a_at	22500327	NM_001003927
6hr Induction Genes 2.0x	12017	NM_153006	NAGS	162417	0.4433	0.0009	11727323_a_at	22493809	NM_153006
6hr Induction Genes 2.0x	12017	BU615833	LINC00341	79686	0.442	0.0001	11754198_at	22520684	NM_024633
6hr Induction Genes 2.0x	12017	AL832345	PRKCE	5581	0.4388	0.0003	11736257_at	22502743	NM_005400
6hr Induction Genes 2.0x	12017	AK300535	TSC22D3	1831	0.4387	0.0019	11751415_a_at	22517901	NM_001015881
6hr Induction Genes 2.0x	12017	NM_001806	CEBPG	1054	0.4347	0.0002	11717693_at	22484179	NM_001252296
6hr Induction Genes 2.0x	12017	AK295222	PSAT1	29968	0.4311	0.0005	11742992_s_at	22509478	NM_021154
6hr Induction Genes 2.0x	12017	AK294266	FKBP9 /// FKBP9L	11328	0.4283	0.0008	11746782_s_at	22513268	NM_007270
6hr Induction Genes 2.0x	12017	NM_001017402	LAMB3	3914	0.425	0	11719487_a_at	22485973	NM_000228
6hr Induction Genes 2.0x	12017	NM_004089	TSC22D3	1831	0.4215	0.0006	11717829_s_at	22484315	NM_001015881
6hr Induction Genes 2.0x	12017	AK295222	PSAT1	29968	0.4209	0.0002	11742991_a_at	22509477	NM_021154
6hr Induction Genes 2.0x	12017	CN256363	ZNF643	65243	0.4207	0.0018	11755077_a_at	22521563	NM_023070
6hr Induction Genes 2.0x	12017	BC000753	KIAA0182	23199	0.4197	0.0135	11718306_a_at	22484792	NM_001134473
6hr Induction Genes 2.0x	12017	BG106343	DDIT3	1649	0.4191	0.0057	11758198_s_at	22524684	NM_001195053
6hr Induction Genes 2.0x	12017	AI263437	C9orf91	203197	0.4186	0.0002	11758550_x_at	22525036	NM_153045
6hr Induction Genes 2.0x	12017	AK303299	SLFN5	162394	0.4175	0.0018	11733214_a_at	22499700	NM_144975
6hr Induction Genes 2.0x	12017	NM_145032	FBXL13	222235	0.4156	0.0001	11737032_x_at	22503518	NM_001111038
6hr Induction Genes 2.0x	12017	NM_001605	AARS	16	0.4154	0	11716636_a_at	22483122	NM_001605
6hr Induction Genes 2.0x	12017	AI122877	FAM107B	83641	0.4143	0	11739687_a_at	22506173	NM_031453
6hr Induction Genes 2.0x	12017	AK295222	PSAT1	29968	0.4116	0	11742993_x_at	22509479	NM_021154
6hr Induction Genes 2.0x	12017	BC015062	MTHFD2	10797	0.411	0.0001	11745892_a_at	22512378	NM_001040409
6hr Induction Genes 2.0x	12017	NM_007098	CLTCL1	8218	0.4085	0.0198	11724990_s_at	22491476	NM_001835
6hr Induction Genes 2.0x	12017	BG026531	MTHFD2	10797	0.408	0	11744002_s_at	22510488	NM_001040409
6hr Induction Genes 2.0x	12017	NM_001018073	PCK2	5106	0.3998	0.0001	11728867_a_at	22495353	NM_001018073
6hr Induction Genes 2.0x	12017	NM_017596	KIF21B	23046	0.3971	0.0026	11722095_a_at	22488581	NM_001252100
6hr Induction Genes 2.0x	12017	BU674634	ANKRD11	29123	0.3949	0	11727064_a_at	22493550	NM_001256182
6hr Induction Genes 2.0x	12017	NM_030674	SLC38A1	81539	0.3946	0.0006	11717102_a_at	22483588	NM_001077484
6hr Induction Genes 2.0x	12017	AK295310	PSAT1	29968	0.3938	0.0018	11751230_a_at	22517716	NM_021154
6hr Induction Genes 2.0x	12017	AK299098	AARS	16	0.3896	0.0019	11746316_a_at	22512802	NM_001605
6hr Induction Genes 2.0x	12017	BU677067	PDE4D	5144	0.3892	0	11724446_a_at	22490932	NM_001104631
6hr Induction Genes 2.0x	12017	NM_001014438	CARS	833	0.3875	0.0012	11716294_a_at	22482780	NM_001014437
6hr Induction Genes 2.0x	12017	BC015062	MTHFD2	10797	0.3864	0.0001	11745893_s_at	22512379	NM_001040409
6hr Induction Genes 2.0x	12017	AF288207	CARS	833	0.3858	0.0001	11737758_x_at	22504244	NM_001014437
6hr Induction Genes 2.0x	12017	NM_018948	ERRFI1	54206	0.3857	0	11715659_s_at	22482145	NM_018948
6hr Induction Genes 2.0x	12017	NM_017947	MOCOS	55034	0.3846	0	11727675_at	22494161	NM_017947
6hr Induction Genes 2.0x	12017	BG026531	MTHFD2	10797	0.3846	0.0008	11744003_x_at	22510489	NM_001040409
6hr Induction Genes 2.0x	12017	BC072452	FAM107B	83641	0.3846	0.0008	11746414_a_at	22512900	NM_031453
6hr Induction Genes 2.0x	12017	CR623979	ATF4	468	0.3824	0.0003	11757047_x_at	22523533	NM_001675
6hr Induction Genes 2.0x	12017	M32977	VEGFA	7422	0.381	0.0007	11741965_x_at	22508451	NM_001025366
6hr Induction Genes 2.0x	12017	NM_001025366	VEGFA	7422	0.3691	0.0008	11725371_s_at	22491857	NM_001025366
6hr Induction Genes 2.0x	12017	NM_003038	SLC1A4	6509	0.3687	0.0003	11730614_a_at	22497100	NM_001135581
6hr Induction Genes 2.0x	12017	NM_004563	PCK2	5106	0.362	0.0008	11719089_a_at	22485575	NM_001018073
6hr Induction Genes 2.0x	12017	BC059363	ST6GALNAC3	256435	0.3604	0.0166	11728769_at	22495255	NM_001160011
6hr Induction Genes 2.0x	12017	AK300035	MTHFD2	10797	0.3592	0	11745870_a_at	22512356	NM_001040409
6hr Induction Genes 2.0x	12017	AB014551	ARHGEF2	9181	0.3535	0.0057	11754291_s_at	22520777	NM_001162383
6hr Induction Genes 2.0x	12017	CR620856	FAM107B	83641	0.3531	0.0051	11754295_a_at	22520781	NM_031453
6hr Induction Genes 2.0x	12017	NM_002357	MXD1	4084	0.3485	0.0011	11719249_at	22485735	NM_001202513
6hr Induction Genes 2.0x	12017	NM_032876	AJUBA	84962	0.3485	0.0108	11726012_a_at	22492498	NM_032876
6hr Induction Genes 2.0x	12017	AK300622	MPP4	58538	0.3474	0.0008	11746094_a_at	22512580	NM_033066
6hr Induction Genes 2.0x	12017	AA716425	JDP2	122953	0.3452	0.0002	11730903_a_at	22497389	NM_001135047
6hr Induction Genes 2.0x	12017	NM_153228	ANKFN1	162282	0.34	0.0146	11737122_at	22503608	NM_153228
6hr Induction Genes 2.0x	12017	AF288207	CARS	833	0.3395	0.0003	11737757_a_at	22504243	NM_001014437
6hr Induction Genes 2.0x	12017	BC026317	SLC16A1	6566	0.3394	0.0021	11718656_at	22485142	NM_001166496
6hr Induction Genes 2.0x	12017	NM_001025366	VEGFA	7422	0.3368	0.0012	11725372_x_at	22491858	NM_001025366
6hr Induction Genes 2.0x	12017	NR_003704	MIR3651 /// SNORA84	100124534	0.3307	0.0026	11757146_at	22523632	NR_003704
6hr Induction Genes 2.0x	12017	AV734189	DDIT3	1649	0.329	0.0001	11758347_s_at	22524833	NM_001195053
6hr Induction Genes 2.0x	12017	U20240	CEBPG	1054	0.3135	0	11717694_a_at	22484180	NM_001252296
6hr Induction Genes 2.0x	12017	BX641017	JHDM1D	80853	0.3124	0.0001	11755223_a_at	22521709	NM_030647
6hr Induction Genes 2.0x	12017	NM_004235	KLF4	9314	0.3116	0.0003	11719634_a_at	22486120	NM_004235
6hr Induction Genes 2.0x	12017	AF022375	VEGFA	7422	0.3052	0	11741964_s_at	22508450	NM_001025366
6hr Induction Genes 2.0x	12017	BU733597	VEGFA	7422	0.2951	0	11725370_s_at	22491856	NM_001025366
6hr Induction Genes 2.0x	12017	CR623093	FKBP9	11328	0.2911	0.0008	11763728_a_at	22530214	NM_007270
6hr Induction Genes 2.0x	12017	BC063625	KRTAP2-4 /// LOC730755	730755	0.2895	0.0013	11746283_s_at	22512769	NM_001165252
6hr Induction Genes 2.0x	12017	AK303632	SLFN5	162394	0.2886	0	11752224_a_at	22518710	NM_144975
6hr Induction Genes 2.0x	12017	NM_024111	CHAC1	79094	0.2875	0.0002	11722407_a_at	22488893	NM_001142776
6hr Induction Genes 2.0x	12017	BC033719	SESN2	83667	0.2866	0.0004	11718324_s_at	22484810	NM_031459
6hr Induction Genes 2.0x	12017	AK291536	CEBPB	1051	0.2862	0	11743077_s_at	22509563	NM_005194
6hr Induction Genes 2.0x	12017	NM_004577	PSPH	5723	0.2797	0.0012	11730796_x_at	22497282	NM_004577
6hr Induction Genes 2.0x	12017	M27281	VEGFA	7422	0.2635	0.0005	11738414_a_at	22504900	NM_001025366
6hr Induction Genes 2.0x	12017	NM_001145855	SH3BP2	6452	0.2529	0.0015	11724312_a_at	22490798	NM_001122681
6hr Induction Genes 2.0x	12017	NM_144975	SLFN5	162394	0.2491	0	11733213_x_at	22499699	NM_144975
6hr Induction Genes 2.0x	12017	BC051303	JDP2	122953	0.2431	0	11736664_a_at	22503150	NM_001135047
6hr Induction Genes 2.0x	12017	AK297724	HAS2	3037	0.2328	0.0001	11749553_a_at	22516039	NM_005328
6hr Induction Genes 2.0x	12017	U54804	HAS2	3037	0.2311	0.0005	11740312_at	22506798	NM_005328
6hr Induction Genes 2.0x	12017	NM_004864	GDF15	9518	0.2293	0.0001	11716664_x_at	22483150	NM_004864
6hr Induction Genes 2.0x	12017	BC069353	HAS2	3037	0.2167	0.0022	11740311_at	22506797	NM_005328
6hr Induction Genes 2.0x	12017	BC031101	TUBE1	51175	0.2079	0.0022	11732219_a_at	22498705	NM_016262
6hr Induction Genes 2.0x	12017	NM_003383	VLDLR	7436	0.199	0.0011	11721181_a_at	22487667	NM_001018056
6hr Induction Genes 2.0x	12017	NM_133443	GPT2	84706	0.1907	0.0017	11719162_a_at	22485648	NM_001142466
6hr Induction Genes 2.0x	12017	BQ645920	GDF15	9518	0.1733	0.0001	11716665_s_at	22483151	NM_004864
6hr Induction Genes 2.0x	12017	CR542179	G0S2	50486	0.1682	0.0008	11754074_s_at	22520560	NM_015714
6hr Induction Genes 2.0x	12017	NM_031459	SESN2	83667	0.1643	0	11718325_at	22484811	NM_031459
6hr Induction Genes 2.0x	12017	NM_021158	TRIB3	57761	0.1639	0	11719811_a_at	22486297	NM_021158
6hr Induction Genes 2.0x	12017	NM_004864	GDF15	9518	0.1599	0.0006	11716663_a_at	22483149	NM_004864
6hr Induction Genes 2.0x	12017	BE874862	G0S2	50486	0.1473	0	11744219_at	22510705	NM_015714
6hr Induction Genes 2.0x	12017	NM_173576	MKX	283078	0.1146	0.0001	11730032_at	22496518	NM_001242702
6hr Induction Genes 2.0x	12017	NM_153742	CTH	1491	0.1024	0.0001	11742278_a_at	22508764	NM_001190463
6hr Induction Genes 2.0x	12017	AW169241	DDIT4	54541	0.0946	0	11743972_a_at	22510458	NM_019058

## Sheet: 12hr
GENELIST_NAME	EXPID	GENEBANK ACC	GENE NAME	LOCUSID	FOLD	PVALUE	GEN_ID_MFR	SPOTID	REFSEQ
12hr Induction Genes 2.0x	12017	NM_002729	HHEX	3087	12.5255	0.0012	11722321_at	22488807	NM_002729
12hr Induction Genes 2.0x	12017	L76380	CALCRL	10203	11.7905	0	11730274_at	22496760	NM_005795
12hr Induction Genes 2.0x	12017	NM_002820	PTHLH	5744	11.0888	0	11731897_a_at	22498383	NM_002820
12hr Induction Genes 2.0x	12017	NM_006403	NEDD9	4739	10.2887	0	11725057_s_at	22491543	NM_001142393			After deleting repeated "REFSEQ", upregulated genes: 174 downregulated genes: 56
12hr Induction Genes 2.0x	12017	AA827918	RASSF2	9770	10.2824	0	11739232_x_at	22505718	NM_014737
12hr Induction Genes 2.0x	12017	NM_001145671	SORBS2	8470	9.5427	0.0009	11735570_a_at	22502056	NM_001145670
12hr Induction Genes 2.0x	12017	AY154471	RASSF2	9770	9.4694	0.0029	11746639_a_at	22513125	NM_014737
12hr Induction Genes 2.0x	12017	AK225812	SORBS2	8470	8.3478	0	11740326_x_at	22506812	NM_001145670
12hr Induction Genes 2.0x	12017	NM_025237	SOST	50964	7.8361	0.0002	11727328_at	22493814	NM_025237
12hr Induction Genes 2.0x	12017	NM_001955	EDN1	1906	7.8113	0.0002	11726024_at	22492510	NM_001168319
12hr Induction Genes 2.0x	12017	NM_005795	CALCRL	10203	7.7828	0	11730275_at	22496761	NM_005795
12hr Induction Genes 2.0x	12017	BC011883	SORBS2	8470	7.6302	0	11735572_x_at	22502058	NM_001145670
12hr Induction Genes 2.0x	12017	NM_003914	CCNA1	8900	7.5951	0	11732350_a_at	22498836	NM_001111045
12hr Induction Genes 2.0x	12017	NM_001870	CPA3	1359	7.5554	0.0001	11727537_at	22494023	NM_001870
12hr Induction Genes 2.0x	12017	BC009720	EDN1	1906	7.2819	0	11726023_a_at	22492509	NM_001168319
12hr Induction Genes 2.0x	12017	NM_000576	IL1B	3553	7.2591	0.0019	11719916_at	22486402	NM_000576
12hr Induction Genes 2.0x	12017	NM_020167	NMUR2	56923	7.2016	0.0003	11729497_at	22495983	NM_020167
12hr Induction Genes 2.0x	12017	BT007067	IL8	3576	7.1461	0	11754026_a_at	22520512	NM_000584
12hr Induction Genes 2.0x	12017	NM_014059	RGCC	28984	6.9883	0.0015	11717582_a_at	22484068	NM_014059
12hr Induction Genes 2.0x	12017	AB033089	FSTL5	56884	6.9097	0	11743826_at	22510312	NM_001128427
12hr Induction Genes 2.0x	12017	BT007067	IL8	3576	6.3008	0.0001	11763226_x_at	22529712	NM_000584
12hr Induction Genes 2.0x	12017	M99435	TLE1	7088	6.0368	0.0009	11740414_a_at	22506900	NM_005077
12hr Induction Genes 2.0x	12017	AL832572	MOB3B	79817	5.4986	0.0016	11725168_s_at	22491654	NM_024761
12hr Induction Genes 2.0x	12017	AK296461	SORBS2	8470	5.2905	0.0006	11741262_x_at	22507748	NM_001145670
12hr Induction Genes 2.0x	12017	NM_173490	TMEM171	134285	5.1531	0.0001	11732818_at	22499304	NM_001161342
12hr Induction Genes 2.0x	12017	BC011883	SORBS2	8470	4.9897	0.0001	11735571_a_at	22502057	NM_001145670
12hr Induction Genes 2.0x	12017	NM_000584	IL8	3576	4.924	0	11718841_s_at	22485327	NM_000584
12hr Induction Genes 2.0x	12017	NM_002214	ITGB8	3696	4.8613	0	11722503_at	22488989	NM_002214
12hr Induction Genes 2.0x	12017	AL832451	GBP2	2634	4.8131	0.0005	11762406_s_at	22528892	NM_004120
12hr Induction Genes 2.0x	12017	NM_058229	FBXO32	114907	4.7686	0	11719394_a_at	22485880	NM_001242463
12hr Induction Genes 2.0x	12017	NM_001511	CXCL1	2919	4.7574	0	11719366_s_at	22485852	NM_001511
12hr Induction Genes 2.0x	12017	NM_152754	SEMA3D	223117	4.684	0.0017	11731195_at	22497681	NM_152754
12hr Induction Genes 2.0x	12017	J03802	PTHLH	5744	4.5382	0	11740245_a_at	22506731	NM_002820
12hr Induction Genes 2.0x	12017	NM_018018	SLC38A4	55089	4.42	0.0005	11725512_a_at	22491998	NM_001143824
12hr Induction Genes 2.0x	12017	AK296461	SORBS2	8470	4.4102	0.0003	11741261_a_at	22507747	NM_001145670
12hr Induction Genes 2.0x	12017	NM_022475	HHIP	64399	4.3678	0.0005	11736086_a_at	22502572	NM_022475
12hr Induction Genes 2.0x	12017	NM_013230	CD24	100133941	4.1308	0	11715918_s_at	22482404	NM_013230
12hr Induction Genes 2.0x	12017	AK300068	RBM24	221662	4.1143	0.0002	11751308_a_at	22517794	NM_001143941
12hr Induction Genes 2.0x	12017	NM_001723	DST /// LOC100652766	100652766	4.108	0.001	11727655_s_at	22494141	NM_001144769
12hr Induction Genes 2.0x	12017	BC017901	PLSCR1	5359	4.0863	0.0083	11759765_at	22526251	NM_021105
12hr Induction Genes 2.0x	12017	BC073163	GBP2	2634	4.0828	0.0001	11719447_s_at	22485933	NM_004120
12hr Induction Genes 2.0x	12017	BC006478	CALB1	793	3.9751	0.0065	11725979_a_at	22492465	NM_004929
12hr Induction Genes 2.0x	12017	AI479863	SIPA1L2	57568	3.969	0	11744184_a_at	22510670	NM_020808
12hr Induction Genes 2.0x	12017	AK024645	HHIP	64399	3.8813	0.0001	11756007_a_at	22522493	NM_022475
12hr Induction Genes 2.0x	12017	AK292998	CALCRL	10203	3.8192	0	11747993_a_at	22514479	NM_005795
12hr Induction Genes 2.0x	12017	NM_001143942	RBM24	221662	3.7604	0	11728873_s_at	22495359	NM_001143941
12hr Induction Genes 2.0x	12017	NM_000067	CA2	760	3.7093	0.0001	11733115_a_at	22499601	NM_000067
12hr Induction Genes 2.0x	12017	DB350079	IFI44	10561	3.6234	0	11746088_a_at	22512574	NM_006417
12hr Induction Genes 2.0x	12017	L43821	NEDD9	4739	3.6056	0.0008	11725058_a_at	22491544	NM_001142393
12hr Induction Genes 2.0x	12017	NM_001008540	CXCR4	7852	3.5773	0.0012	11728190_s_at	22494676	NM_001008540
12hr Induction Genes 2.0x	12017	NM_006417	IFI44	10561	3.4488	0	11719886_a_at	22486372	NM_006417
12hr Induction Genes 2.0x	12017	NM_017839	LPCAT2	54947	3.4485	0.0037	11725417_a_at	22491903	NM_017839
12hr Induction Genes 2.0x	12017	BE464297	S1PR1	1901	3.4247	0.0037	11743816_s_at	22510302	NM_001400
12hr Induction Genes 2.0x	12017	AF104266	LPHN2	23266	3.4183	0.0005	11745273_a_at	22511759	NM_012302
12hr Induction Genes 2.0x	12017	NM_024761	MOB3B	79817	3.385	0	11725167_at	22491653	NM_024761
12hr Induction Genes 2.0x	12017	AY358250	SHC4	399694	3.3705	0.0012	11747231_a_at	22513717	NM_203349
12hr Induction Genes 2.0x	12017	AK293052	RBM24	221662	3.3614	0.0017	11728872_a_at	22495358	NM_001143941
12hr Induction Genes 2.0x	12017	NM_023112	OTUB2	78990	3.3475	0.0012	11725831_at	22492317	NM_023112
12hr Induction Genes 2.0x	12017	AK302527	IFI44	10561	3.3409	0.0007	11748003_a_at	22514489	NM_006417
12hr Induction Genes 2.0x	12017	U16261	IL24	11009	3.3384	0.0003	11731834_a_at	22498320	NM_001185156
12hr Induction Genes 2.0x	12017	NM_014951	ZNF365	22891	3.3216	0.0006	11731263_a_at	22497749	NM_014951
12hr Induction Genes 2.0x	12017	NM_023112	OTUB2	78990	3.2809	0.0001	11725832_s_at	22492318	NM_023112
12hr Induction Genes 2.0x	12017	NM_001037132	NRCAM	4897	3.2537	0.0003	11724337_s_at	22490823	NM_001037132
12hr Induction Genes 2.0x	12017	BC047620	GUCY1B3	2983	3.2512	0	11726581_a_at	22493067	NM_000857
12hr Induction Genes 2.0x	12017	NM_015123	FRMD4B	23150	3.2281	0.005	11731574_at	22498060	NM_015123
12hr Induction Genes 2.0x	12017	BC036773	OPN3	23596	3.2059	0	11744481_s_at	22510967	NM_001030011
12hr Induction Genes 2.0x	12017	NM_002600	PDE4B	5142	3.194	0.0036	11724095_a_at	22490581	NM_001037339
12hr Induction Genes 2.0x	12017	AW070460	CD55	1604	3.1764	0.0004	11746180_a_at	22512666	NM_000574
12hr Induction Genes 2.0x	12017	U88576	CD55	1604	3.176	0	11755084_x_at	22521570	NM_000574
12hr Induction Genes 2.0x	12017	AK301220	IL7R	3575	3.1723	0.004	11751647_a_at	22518133	NM_002185
12hr Induction Genes 2.0x	12017	BC032839	IFIT2	3433	3.1362	0	11721874_at	22488360	NM_001547
12hr Induction Genes 2.0x	12017	NM_001448	GPC4	2239	3.1341	0.0003	11727403_at	22493889	NM_001448
12hr Induction Genes 2.0x	12017	BC001288	CD55	1604	3.1281	0	11728701_a_at	22495187	NM_000574
12hr Induction Genes 2.0x	12017	AB240567	CD55	1604	3.1263	0	11752832_x_at	22519318	NM_000574
12hr Induction Genes 2.0x	12017	AK298688	SGK1	6446	3.1221	0.0001	11737749_a_at	22504235	NM_001143676
12hr Induction Genes 2.0x	12017	CR610618	MAML2	84441	3.1026	0.0001	11759346_a_at	22525832	NM_032427
12hr Induction Genes 2.0x	12017	NM_000325	PITX2	5308	3.0742	0.0032	11729935_a_at	22496421	NM_000325
12hr Induction Genes 2.0x	12017	AK098525	HHIP	64399	3.0699	0	11754706_a_at	22521192	NM_022475
12hr Induction Genes 2.0x	12017	AK289954	SEMA3A	10371	3.0668	0.0001	11730390_at	22496876	NM_006080
12hr Induction Genes 2.0x	12017	CR626841	RTN1	6252	3.0615	0.0001	11756827_a_at	22523313	NM_001243115
12hr Induction Genes 2.0x	12017	AK300621	CD55	1604	3.057	0	11762060_x_at	22528546	NM_000574
12hr Induction Genes 2.0x	12017	BC017387	SPP1	6696	3.046	0.0005	11727790_x_at	22494276	NM_000582
12hr Induction Genes 2.0x	12017	CR596199	LPHN2	23266	3.0159	0	11743568_a_at	22510054	NM_012302
12hr Induction Genes 2.0x	12017	AK299731	RND3	390	3.0157	0.0004	11753427_a_at	22519913	NM_001254738
12hr Induction Genes 2.0x	12017	NM_001128305	PLSCR4	57088	2.9876	0.0005	11741315_a_at	22507801	NM_001128304
12hr Induction Genes 2.0x	12017	AK297734	STC1	6781	2.9562	0.0022	11750279_a_at	22516765	NM_003155
12hr Induction Genes 2.0x	12017	AW150758	DDX60	55601	2.941	0.0001	11744236_a_at	22510722	NM_017631
12hr Induction Genes 2.0x	12017	AK304404	TGFBR2	7048	2.9386	0.0064	11750840_s_at	22517326	NM_001024847
12hr Induction Genes 2.0x	12017	AI537264	PLSCR1	5359	2.9144	0	11743911_a_at	22510397	NM_021105
12hr Induction Genes 2.0x	12017	AK293357	RARRES3	5920	2.9077	0.0069	11748907_a_at	22515393	NM_004585
12hr Induction Genes 2.0x	12017	AK300181	PLSCR1	5359	2.8984	0.0004	11751652_x_at	22518138	NM_021105
12hr Induction Genes 2.0x	12017	BC069999	IL7R	3575	2.895	0.0001	11733187_a_at	22499673	NM_002185
12hr Induction Genes 2.0x	12017	BG184619	PLSCR1	5359	2.8933	0	11757533_x_at	22524019	NM_021105
12hr Induction Genes 2.0x	12017	NM_006080	SEMA3A	10371	2.8851	0	11730391_at	22496877	NM_006080
12hr Induction Genes 2.0x	12017	AY237723	IL24	11009	2.8739	0.0004	11754176_a_at	22520662	NM_001185156
12hr Induction Genes 2.0x	12017	AK023271	LPCAT2	54947	2.8708	0.0169	11725419_a_at	22491905	NM_017839
12hr Induction Genes 2.0x	12017	NM_001042475	CEP85L	387119	2.8661	0.0063	11739888_at	22506374	NM_001042475
12hr Induction Genes 2.0x	12017	NM_001143678	SGK1	6446	2.8651	0.0027	11737750_s_at	22504236	NM_001143676
12hr Induction Genes 2.0x	12017	DB296057	PLSCR1	5359	2.8644	0.0001	11757872_s_at	22524358	NM_021105
12hr Induction Genes 2.0x	12017	N20862	SLC2A12	154091	2.8473	0.0001	11730239_a_at	22496725	NM_145176
12hr Induction Genes 2.0x	12017	BC104808	RBM24	221662	2.8266	0.0066	11738153_x_at	22504639	NM_001143941
12hr Induction Genes 2.0x	12017	BC029044	STC1	6781	2.823	0.0003	11724196_s_at	22490682	NM_003155
12hr Induction Genes 2.0x	12017	AA166678	SIPA1L2	57568	2.8098	0.0023	11757924_s_at	22524410	NM_020808
12hr Induction Genes 2.0x	12017	AK295491	SPP1	6696	2.8087	0.0029	11746506_a_at	22512992	NM_000582
12hr Induction Genes 2.0x	12017	NM_005627	SGK1	6446	2.7797	0.0001	11733698_s_at	22500184	NM_001143676
12hr Induction Genes 2.0x	12017	CF529882	TLR4	7099	2.7771	0.0056	11743197_at	22509683	NM_003266
12hr Induction Genes 2.0x	12017	BC013734	PTGS2	5743	2.7719	0.0021	11724038_a_at	22490524	NM_000963
12hr Induction Genes 2.0x	12017	AK300181	PLSCR1	5359	2.7656	0	11751651_s_at	22518137	NM_021105
12hr Induction Genes 2.0x	12017	AI249114	CXADR	1525	2.7624	0.0057	11758000_s_at	22524486	NM_001207063
12hr Induction Genes 2.0x	12017	AW299767	CALB1	793	2.7517	0.0001	11754472_a_at	22520958	NM_004929
12hr Induction Genes 2.0x	12017	AB240568	CD55	1604	2.7496	0	11762726_x_at	22529212	NM_000574
12hr Induction Genes 2.0x	12017	NM_032813	TMTC4	84899	2.7448	0.0043	11737296_s_at	22503782	NM_001079669
12hr Induction Genes 2.0x	12017	NM_014707	HDAC9	9734	2.7434	0	11728076_at	22494562	NM_001204144
12hr Induction Genes 2.0x	12017	NM_020711	ERMN	57471	2.741	0.0013	11739015_a_at	22505501	NM_001009959
12hr Induction Genes 2.0x	12017	M14648	ITGAV	3685	2.7374	0.0002	11716300_x_at	22482786	NM_001144999
12hr Induction Genes 2.0x	12017	NM_000963	PTGS2	5743	2.7364	0.0001	11724037_at	22490523	NM_000963
12hr Induction Genes 2.0x	12017	NM_003155	STC1	6781	2.736	0	11724197_at	22490683	NM_003155
12hr Induction Genes 2.0x	12017	NM_004787	SLIT2	9353	2.7323	0	11721399_a_at	22487885	NM_004787
12hr Induction Genes 2.0x	12017	NM_152737	RNF182	221687	2.7134	0	11737774_a_at	22504260	NM_001165032
12hr Induction Genes 2.0x	12017	NM_001338	CXADR	1525	2.7091	0.0002	11720637_x_at	22487123	NM_001207063
12hr Induction Genes 2.0x	12017	NM_001143676	SGK1	6446	2.7049	0.0003	11715931_s_at	22482417	NM_001143676
12hr Induction Genes 2.0x	12017	NM_020663	RHOJ	57381	2.7003	0.0013	11740182_a_at	22506668	NM_020663
12hr Induction Genes 2.0x	12017	W92993	RHOJ	57381	2.6903	0.0008	11759345_at	22525831	NM_020663
12hr Induction Genes 2.0x	12017	BF439987	DCLK1	9201	2.6578	0.0001	11728342_at	22494828	NM_001195415
12hr Induction Genes 2.0x	12017	NM_001040665	STEAP2	261729	2.6519	0.0059	11742423_a_at	22508909	NM_001040665
12hr Induction Genes 2.0x	12017	AK126745	LRIG1	26018	2.6464	0.0006	11755110_a_at	22521596	NM_015541
12hr Induction Genes 2.0x	12017	AA904865	CCDC85A	114800	2.6234	0	11744318_at	22510804	NM_001080433
12hr Induction Genes 2.0x	12017	W94949	PEG10	23089	2.6088	0.0038	11718358_at	22484844	NM_001040152
12hr Induction Genes 2.0x	12017	AK295742	SORBS2	8470	2.6044	0.0006	11748821_a_at	22515307	NM_001145670
12hr Induction Genes 2.0x	12017	BT006880	CXCL1 /// CXCL2	2919	2.603	0.0006	11763250_x_at	22529736	NM_001511
12hr Induction Genes 2.0x	12017	NM_030915	LBH	81606	2.5968	0.0057	11716162_at	22482648	NM_030915
12hr Induction Genes 2.0x	12017	U46768	STC1	6781	2.5941	0.0002	11724198_a_at	22490684	NM_003155
12hr Induction Genes 2.0x	12017	AK290358	SLC26A2	1836	2.5694	0.0015	11720105_a_at	22486591	NM_000112
12hr Induction Genes 2.0x	12017	BX647203	DNAJC6	9829	2.5517	0	11745300_a_at	22511786	NM_001256864
12hr Induction Genes 2.0x	12017	NM_001005242	PKP2	5318	2.5368	0	11726131_a_at	22492617	NM_001005242
12hr Induction Genes 2.0x	12017	NM_138786	TM4SF18	116441	2.5368	0.0016	11725403_at	22491889	NM_001184723
12hr Induction Genes 2.0x	12017	g22035683	AREG /// AREGB	374	2.534	0.001	11715306_s_at	22481792	NM_001657
12hr Induction Genes 2.0x	12017	AK303900	CAST	831	2.5325	0.0009	11750050_a_at	22516536	NM_001042440
12hr Induction Genes 2.0x	12017	AK075463	SPP1	6696	2.5224	0.0138	11754604_x_at	22521090	NM_000582
12hr Induction Genes 2.0x	12017	NM_001957	EDNRA	1909	2.5071	0.0162	11719488_at	22485974	NM_001166055
12hr Induction Genes 2.0x	12017	NM_001062	TCN1	6947	2.5062	0.0003	11726124_at	22492610	NM_001062
12hr Induction Genes 2.0x	12017	BC020729	CCNE2	9134	2.5057	0.0026	11728301_a_at	22494787	NM_004702
12hr Induction Genes 2.0x	12017	AK096232	SESTD1	91404	2.4846	0.0003	11731539_at	22498025	NM_178123
12hr Induction Genes 2.0x	12017	AK299139	PKP2	5318	2.4844	0.0048	11726130_a_at	22492616	NM_001005242
12hr Induction Genes 2.0x	12017	AF200715	GULP1	51454	2.4817	0	11728307_x_at	22494793	NM_001252668
12hr Induction Genes 2.0x	12017	AK055922	CDK6	1021	2.4671	0.0137	11723241_at	22489727	NM_001145306
12hr Induction Genes 2.0x	12017	NM_032199	ARID5B	84159	2.4508	0.0042	11718927_a_at	22485413	NM_001244638
12hr Induction Genes 2.0x	12017	AL833262	SYNM	23336	2.4482	0.0011	11755757_a_at	22522243	NM_015286
12hr Induction Genes 2.0x	12017	NM_004775	B4GALT6	9331	2.4446	0.0011	11731841_a_at	22498327	NM_004775
12hr Induction Genes 2.0x	12017	AV682654	CFH /// CFHR1	3075	2.4401	0.0018	11757990_s_at	22524476	NM_000186
12hr Induction Genes 2.0x	12017	BC017166	GPC4	2239	2.44	0.016	11727404_a_at	22493890	NM_001448
12hr Induction Genes 2.0x	12017	DQ280491	CALCRL	10203	2.4382	0.0021	11761796_at	22528282	NM_005795
12hr Induction Genes 2.0x	12017	NM_178868	CMTM8	152189	2.438	0.0103	11726437_a_at	22492923	NM_178868
12hr Induction Genes 2.0x	12017	BC144510	TMEM2	23670	2.4264	0.0039	11755762_a_at	22522248	NM_001135820
12hr Induction Genes 2.0x	12017	NM_004398	DDX10	1662	2.4233	0.003	11723101_a_at	22489587	NM_004398
12hr Induction Genes 2.0x	12017	NM_015376	RASGRP3	25780	2.4173	0.0023	11740140_a_at	22506626	NM_001139488
12hr Induction Genes 2.0x	12017	AF272363	NMUR2	56923	2.4159	0.0003	11729498_at	22495984	NM_020167
12hr Induction Genes 2.0x	12017	AK290090	SPP1	6696	2.3937	0.0002	11737944_x_at	22504430	NM_000582
12hr Induction Genes 2.0x	12017	BU630777	NDFIP2	54602	2.3911	0.0001	11727797_at	22494283	NM_001161407
12hr Induction Genes 2.0x	12017	NM_004833	AIM2	9447	2.3896	0.0055	11730457_a_at	22496943	NM_004833
12hr Induction Genes 2.0x	12017	NM_001037582	SCD5	79966	2.3784	0	11716433_s_at	22482919	NM_001037582
12hr Induction Genes 2.0x	12017	AF165281	ABCA1	19	2.3762	0.0024	11739503_at	22505989	NM_005502
12hr Induction Genes 2.0x	12017	NM_000877	IL1R1	3554	2.3756	0.0004	11718025_at	22484511	NM_000877
12hr Induction Genes 2.0x	12017	AK302550	ITGAV	3685	2.3723	0.0108	11752333_a_at	22518819	NM_001144999
12hr Induction Genes 2.0x	12017	AK302651	PDP1	54704	2.365	0.0043	11747314_a_at	22513800	NM_001161778
12hr Induction Genes 2.0x	12017	AW780256	CADPS2	93664	2.3634	0.0003	11754806_s_at	22521292	NM_001009571
12hr Induction Genes 2.0x	12017	BM682674	MAB21L1	4081	2.3595	0.0002	11743770_at	22510256	NM_005584
12hr Induction Genes 2.0x	12017	AK074243	TMEM87B	84910	2.351	0.0129	11739470_at	22505956	NM_032824
12hr Induction Genes 2.0x	12017	DB308423	CEP85L	387119	2.3433	0	11759323_at	22525809	NM_001042475
12hr Induction Genes 2.0x	12017	NM_005585	SMAD6	4091	2.3424	0.006	11730338_a_at	22496824	NM_001142861
12hr Induction Genes 2.0x	12017	AI027957	SHC4	399694	2.3398	0.0015	11758507_s_at	22524993	NM_203349
12hr Induction Genes 2.0x	12017	U76996	KCNK1	3775	2.3384	0.005	11747096_a_at	22513582	NM_002245
12hr Induction Genes 2.0x	12017	BU730835	CFH	3075	2.3362	0.0012	11743847_x_at	22510333	NM_000186
12hr Induction Genes 2.0x	12017	BC104808	RBM24	221662	2.3268	0.0002	11738152_a_at	22504638	NM_001143941
12hr Induction Genes 2.0x	12017	NM_006557	DMRT2	10655	2.3232	0.0011	11727728_a_at	22494214	NM_001130865
12hr Induction Genes 2.0x	12017	BU686994	NUAK1	9891	2.3171	0	11739973_s_at	22506459	NM_014840
12hr Induction Genes 2.0x	12017	NM_005574	LMO2	4005	2.3124	0.0011	11730469_s_at	22496955	NM_001142315
12hr Induction Genes 2.0x	12017	BC026345	ERMN	57471	2.3096	0.004	11739016_a_at	22505502	NM_001009959
12hr Induction Genes 2.0x	12017	BC098343	PDP1	54704	2.3036	0.0008	11722230_a_at	22488716	NM_001161778
12hr Induction Genes 2.0x	12017	BC059390	SLC26A2	1836	2.2999	0.0005	11720106_a_at	22486592	NM_000112
12hr Induction Genes 2.0x	12017	AK303900	CAST	831	2.2993	0.0008	11750051_x_at	22516537	NM_001042440
12hr Induction Genes 2.0x	12017	BF185501	SCD	6319	2.2967	0.0114	11756174_s_at	22522660	NM_005063
12hr Induction Genes 2.0x	12017	NM_016315	GULP1	51454	2.2938	0.0042	11728305_s_at	22494791	NM_001252668
12hr Induction Genes 2.0x	12017	BU730835	CFH /// CFHR1	3075	2.2934	0.0001	11743846_s_at	22510332	NM_000186
12hr Induction Genes 2.0x	12017	AF077298	PRSS12	8492	2.2919	0.0062	11739890_at	22506376	NM_003619
12hr Induction Genes 2.0x	12017	NM_017563	IL17RD	54756	2.2876	0.0017	11723173_at	22489659	NM_017563
12hr Induction Genes 2.0x	12017	AY082381	NOV	4856	2.2813	0.0015	11723033_at	22489519	NM_002514
12hr Induction Genes 2.0x	12017	NM_001077427	LYPD1	116372	2.2787	0.0029	11741122_a_at	22507608	NM_001077427
12hr Induction Genes 2.0x	12017	AK295864	DST /// LOC100652766	100652766	2.2652	0	11760436_a_at	22526922	NM_001144769
12hr Induction Genes 2.0x	12017	BC004205	SPRY2	10253	2.2601	0.0001	11753988_a_at	22520474	NM_005842
12hr Induction Genes 2.0x	12017	NM_032587	CARD6	84674	2.258	0.0063	11728617_at	22495103	NM_032587
12hr Induction Genes 2.0x	12017	NM_018444	PDP1	54704	2.2577	0.0051	11722231_at	22488717	NM_001161778
12hr Induction Genes 2.0x	12017	NM_006033	LIPG	9388	2.2548	0.0011	11725469_at	22491955	NM_006033
12hr Induction Genes 2.0x	12017	NM_015345	DAAM2	23500	2.25	0.0025	11724178_a_at	22490664	NM_001201427
12hr Induction Genes 2.0x	12017	AF200715	GULP1	51454	2.2489	0.0002	11728306_s_at	22494792	NM_001252668
12hr Induction Genes 2.0x	12017	BX379768	SPP1	6696	2.2488	0.0011	11755730_x_at	22522216	NM_000582
12hr Induction Genes 2.0x	12017	DB308423	CEP85L	387119	2.243	0	11759324_s_at	22525810	NM_001042475
12hr Induction Genes 2.0x	12017	CA774643	WASL	8976	2.2393	0.0006	11717284_a_at	22483770	NM_003941
12hr Induction Genes 2.0x	12017	AF019386	HS3ST1	9957	2.2382	0	11733913_at	22500399	NM_005114
12hr Induction Genes 2.0x	12017	NM_138410	CMTM7	112616	2.2322	0.0001	11721702_a_at	22488188	NM_138410
12hr Induction Genes 2.0x	12017	BC021803	FRYL	285527	2.2314	0.0021	11746570_s_at	22513056	NM_001039751
12hr Induction Genes 2.0x	12017	NM_001010000	ARHGAP28	79822	2.2253	0.0012	11723981_s_at	22490467	NM_001010000
12hr Induction Genes 2.0x	12017	CA944479	ST8SIA4	7903	2.2221	0.009	11739521_at	22506007	NM_005668
12hr Induction Genes 2.0x	12017	NM_206966	C5orf46	389336	2.221	0.003	11735867_a_at	22502353	NM_206966
12hr Induction Genes 2.0x	12017	CR541824	SCG5	6447	2.2164	0.0017	11742698_at	22509184	NM_001144757
12hr Induction Genes 2.0x	12017	AK298626	GULP1	51454	2.2142	0	11751678_a_at	22518164	NM_001252668
12hr Induction Genes 2.0x	12017	NM_006207	PDGFRL	5157	2.2123	0.002	11723535_at	22490021	NM_006207
12hr Induction Genes 2.0x	12017	BX648278	FOXO1	2308	2.2114	0.0009	11755772_a_at	22522258	NM_002015
12hr Induction Genes 2.0x	12017	NM_001008540	CXCR4	7852	2.2107	0.0069	11728191_x_at	22494677	NM_001008540
12hr Induction Genes 2.0x	12017	U64317	NEDD9	4739	2.2104	0.006	11725056_a_at	22491542	NM_001142393
12hr Induction Genes 2.0x	12017	AK300431	IFIT2	3433	2.2102	0.0007	11721873_at	22488359	NM_001547
12hr Induction Genes 2.0x	12017	AK098450	MMP1	4312	2.2092	0.011	11755928_s_at	22522414	NM_001145938
12hr Induction Genes 2.0x	12017	AK302156	SHC4	399694	2.2091	0.009	11748299_a_at	22514785	NM_203349
12hr Induction Genes 2.0x	12017	NM_003641	IFITM1	8519	2.1923	0.0005	11715670_a_at	22482156	NM_003641
12hr Induction Genes 2.0x	12017	NM_001100829	TMEM170B	100113407	2.1864	0.0034	11731258_at	22497744	NM_001100829
12hr Induction Genes 2.0x	12017	AK290090	SPP1	6696	2.186	0.0107	11737943_a_at	22504429	NM_000582
12hr Induction Genes 2.0x	12017	AY137774	FRMD3	257019	2.1857	0.0001	11750746_a_at	22517232	NM_001244959
12hr Induction Genes 2.0x	12017	NM_003733	OASL	8638	2.1761	0.0081	11726364_x_at	22492850	NM_001261825
12hr Induction Genes 2.0x	12017	BX537388	PIK3R3	8503	2.1739	0.0009	11754316_a_at	22520802	NM_001114172
12hr Induction Genes 2.0x	12017	AI972268	PSME4	23198	2.1708	0.023	11717864_a_at	22484350	NM_014614
12hr Induction Genes 2.0x	12017	CD172116	CAMK2D	817	2.1523	0.0142	11725327_a_at	22491813	NM_001221
12hr Induction Genes 2.0x	12017	AK311312	RND3	390	2.1487	0.0198	11756465_s_at	22522951	NM_001254738
12hr Induction Genes 2.0x	12017	AK291745	SSFA2	6744	2.1485	0.0001	11718023_x_at	22484509	NM_001130445
12hr Induction Genes 2.0x	12017	NM_001135820	TMEM2	23670	2.1479	0.0045	11741536_x_at	22508022	NM_001135820
12hr Induction Genes 2.0x	12017	NM_001321	CSRP2	1466	2.1476	0.005	11729239_x_at	22495725	NM_001321
12hr Induction Genes 2.0x	12017	BC146780	TMEM2	23670	2.1453	0.0033	11720367_a_at	22486853	NM_001135820
12hr Induction Genes 2.0x	12017	AK301220	IL7R	3575	2.1372	0.0012	11762266_x_at	22528752	NM_002185
12hr Induction Genes 2.0x	12017	NM_000575	IL1A	3552	2.1326	0.0006	11725198_at	22491684	NM_000575
12hr Induction Genes 2.0x	12017	NM_003242	TGFBR2	7048	2.1282	0	11724682_s_at	22491168	NM_001024847
12hr Induction Genes 2.0x	12017	CA778103	CERS6	253782	2.1182	0.0087	11755520_s_at	22522006	NM_001256126
12hr Induction Genes 2.0x	12017	NM_014398	LAMP3	27074	2.1128	0.0011	11725429_at	22491915	NM_014398
12hr Induction Genes 2.0x	12017	BM969177	ST8SIA4	7903	2.1126	0.0096	11739522_at	22506008	NM_005668
12hr Induction Genes 2.0x	12017	BF678927	SOX4	6659	2.1109	0	11719561_s_at	22486047	NM_003107
12hr Induction Genes 2.0x	12017	NM_019053	EXOC6	54536	2.1087	0	11723221_a_at	22489707	NM_001013848
12hr Induction Genes 2.0x	12017	BC043216	VSIG1	340547	2.1068	0.0055	11734855_at	22501341	NM_001170553
12hr Induction Genes 2.0x	12017	M25756	SCG2	7857	2.1066	0.0013	11720030_a_at	22486516	NM_003469
12hr Induction Genes 2.0x	12017	BC005254	CLEC2B	9976	2.1065	0.0002	11721302_a_at	22487788	NM_005127
12hr Induction Genes 2.0x	12017	NM_024420	PLA2G4A	5321	2.1047	0.0054	11727754_a_at	22494240	NM_024420
12hr Induction Genes 2.0x	12017	AF004021	PTGFR	5737	2.1045	0.0008	11740586_a_at	22507072	NM_000959
12hr Induction Genes 2.0x	12017	NM_022168	IFIH1	64135	2.0902	0.0016	11724346_a_at	22490832	NM_022168
12hr Induction Genes 2.0x	12017	AU134691	TNFSF10	8743	2.0899	0.0017	11743731_a_at	22510217	NM_001190942
12hr Induction Genes 2.0x	12017	AU147415	FRMD4B	23150	2.0893	0.0013	11731573_a_at	22498059	NM_015123
12hr Induction Genes 2.0x	12017	NM_006398	GABBR1 /// UBD	10537	2.0837	0.0012	11723069_at	22489555	NM_001470
12hr Induction Genes 2.0x	12017	R99585	INPP5F	22876	2.0828	0	11758025_x_at	22524511	NM_001243194
12hr Induction Genes 2.0x	12017	NM_001024948	FNBP1L	54874	2.0803	0	11717552_s_at	22484038	NM_001024948
12hr Induction Genes 2.0x	12017	NM_152586	USP54	159195	2.0797	0.0044	11726413_a_at	22492899	NM_152586
12hr Induction Genes 2.0x	12017	U90065	KCNK1	3775	2.0751	0.0066	11728842_a_at	22495328	NM_002245
12hr Induction Genes 2.0x	12017	NM_004335	BST2	684	2.0715	0.0001	11716034_a_at	22482520	NM_004335
12hr Induction Genes 2.0x	12017	NM_005604	POU3F2	5454	2.0713	0.0002	11733520_at	22500006	NM_005604
12hr Induction Genes 2.0x	12017	U34038	F2RL1	2150	2.0672	0.0004	11728827_at	22495313	NM_005242
12hr Induction Genes 2.0x	12017	AY485530	PTGFR	5737	2.0638	0.0254	11734179_a_at	22500665	NM_000959
12hr Induction Genes 2.0x	12017	CA772125	SIPA1L2	57568	2.0601	0.0057	11744185_a_at	22510671	NM_020808
12hr Induction Genes 2.0x	12017	AF097159	B4GALT6	9331	2.0595	0.0001	11731842_a_at	22498328	NM_004775
12hr Induction Genes 2.0x	12017	BT006880	CXCL1	2919	2.0555	0.0003	11754114_a_at	22520600	NM_001511
12hr Induction Genes 2.0x	12017	NM_004335	BST2	684	2.0532	0.005	11716036_x_at	22482522	NM_004335
12hr Induction Genes 2.0x	12017	NM_178140	PDZD2	23037	2.0521	0	11718912_a_at	22485398	NM_015022
12hr Induction Genes 2.0x	12017	NM_003022	SH3BGRL	6451	2.0425	0.0036	11715624_at	22482110	NM_003022
12hr Induction Genes 2.0x	12017	AI660920	ITGAV	3685	2.0394	0.0002	11757515_s_at	22524001	NM_001144999
12hr Induction Genes 2.0x	12017	AW025579	BICC1	80114	2.0393	0.0053	11763406_s_at	22529892	NM_001080512
12hr Induction Genes 2.0x	12017	AK308688	IFIT1	3434	2.039	0.0014	11756820_a_at	22523306	NM_001548
12hr Induction Genes 2.0x	12017	NM_004585	RARRES3	5920	2.0347	0.0048	11719692_a_at	22486178	NM_004585
12hr Induction Genes 2.0x	12017	AK299059	DCLK1	9201	2.0315	0.0002	11745757_a_at	22512243	NM_001195415
12hr Induction Genes 2.0x	12017	NM_003107	SOX4	6659	2.0286	0.0109	11719562_at	22486048	NM_003107
12hr Induction Genes 2.0x	12017	NM_139058	ARX	170302	2.0245	0.0026	11731211_at	22497697	NM_139058
12hr Induction Genes 2.0x	12017	NM_001144002	CTPS2	56474	2.0164	0.0017	11732361_a_at	22498847	NM_001144002
12hr Induction Genes 2.0x	12017	NM_004833	AIM2	9447	2.0147	0.0087	11730458_at	22496944	NM_004833
12hr Induction Genes 2.0x	12017	AF087862	RHOJ	57381	2.0134	0.0093	11749864_a_at	22516350	NM_020663
12hr Induction Genes 2.0x	12017	BQ025327	CNOT6L	246175	2.0131	0.0274	11723183_s_at	22489669	NM_144571
12hr Induction Genes 2.0x	12017	BC141821	RTKN2	219790	2.01	0.0044	11759693_at	22526179	NM_145307
12hr Induction Genes 2.0x	12017	BC065536	DST /// LOC100652766	100652766	2.0093	0.0331	11745119_a_at	22511605	NM_001144769
12hr Induction Genes 2.0x	12017	NM_001127257	SLC39A10	57181	2.0079	0.0001	11720391_a_at	22486877	NM_001127257
12hr Induction Genes 2.0x	12017	NM_014689	DOCK10	55619	2.0075	0.0029	11723863_a_at	22490349	NM_014689
12hr Induction Genes 2.0x	12017	AI719730	GUCY1A3	2982	2.0041	0.0001	11722138_s_at	22488624	NM_000856
12hr Induction Genes 2.0x	12017	AK025078	SLC26A2	1836	2.0033	0.0006	11754594_a_at	22521080	NM_000112
12hr Induction Genes 2.0x	12017	NM_198315	VWA5A	4013	2.0009	0.0113	11723563_at	22490049	NM_001130142
12hr Induction Genes 2.0x	12017	NM_001321	CSRP2	1466	2.0006	0.0027	11729238_a_at	22495724	NM_001321
12hr Induction Genes 2.0x	12017	AK316546	SLC1A5	6510	0.4996	0.0004	11740714_a_at	22507200	NM_001145144
12hr Induction Genes 2.0x	12017	CA416531	KLF10	7071	0.4994	0.0002	11743682_s_at	22510168	NM_001032282
12hr Induction Genes 2.0x	12017	NM_133436	ASNS	440	0.4993	0.0002	11716364_s_at	22482850	NM_001178075
12hr Induction Genes 2.0x	12017	M32977	VEGFA	7422	0.4989	0.001	11741965_x_at	22508451	NM_001025366
12hr Induction Genes 2.0x	12017	BQ645920	GDF15	9518	0.4978	0.0046	11716665_s_at	22483151	NM_004864
12hr Induction Genes 2.0x	12017	BT006840	PSAT1	29968	0.4977	0.0016	11747348_a_at	22513834	NM_021154
12hr Induction Genes 2.0x	12017	BU784653	PNMA2	10687	0.4967	0.0004	11757849_s_at	22524335	NM_007257
12hr Induction Genes 2.0x	12017	NM_005475	SH2B3	10019	0.4964	0	11717409_at	22483895	NM_005475
12hr Induction Genes 2.0x	12017	CR456952	PLAUR	5329	0.4962	0.001	11742818_a_at	22509304	NM_001005376
12hr Induction Genes 2.0x	12017	NM_001709	BDNF	627	0.4944	0.0009	11733751_s_at	22500237	NM_001143805
12hr Induction Genes 2.0x	12017	U54711	BIRC3	330	0.4935	0.0221	11722852_s_at	22489338	NM_001165
12hr Induction Genes 2.0x	12017	BC152448	LPIN2	9663	0.4932	0.0034	11744150_s_at	22510636	NM_014646
12hr Induction Genes 2.0x	12017	NM_005628	SLC1A5	6510	0.4923	0.0002	11716866_x_at	22483352	NM_001145144
12hr Induction Genes 2.0x	12017	AK292851	NAMPT	10135	0.4908	0.0001	11743111_s_at	22509597	NM_005746
12hr Induction Genes 2.0x	12017	AF288207	CARS	833	0.4902	0.0139	11737758_x_at	22504244	NM_001014437
12hr Induction Genes 2.0x	12017	CR620856	FAM107B	83641	0.487	0.0017	11754295_a_at	22520781	NM_031453
12hr Induction Genes 2.0x	12017	NM_005655	KLF10	7071	0.4854	0.0008	11733068_s_at	22499554	NM_001032282
12hr Induction Genes 2.0x	12017	NM_007257	PNMA2	10687	0.4836	0.0001	11723928_at	22490414	NM_007257
12hr Induction Genes 2.0x	12017	AK296788	EPHA2	1969	0.4824	0.0289	11748166_a_at	22514652	NM_004431
12hr Induction Genes 2.0x	12017	M64445	CSF2RA	1438	0.4817	0.0001	11751225_s_at	22517711	NM_001161529
12hr Induction Genes 2.0x	12017	AI263437	C9orf91	203197	0.4809	0.0095	11758550_x_at	22525036	NM_153045
12hr Induction Genes 2.0x	12017	NM_001014438	CARS	833	0.4799	0.0021	11716294_a_at	22482780	NM_001014437
12hr Induction Genes 2.0x	12017	AI636845	MARS	4141	0.4742	0.0035	11744024_a_at	22510510	NM_004990
12hr Induction Genes 2.0x	12017	AY029180	PLAUR	5329	0.4726	0.0042	11743062_a_at	22509548	NM_001005376
12hr Induction Genes 2.0x	12017	AK075342	C12orf39	80763	0.4714	0.0018	11759005_a_at	22525491	NM_030572
12hr Induction Genes 2.0x	12017	NM_004864	GDF15	9518	0.4701	0.0061	11716664_x_at	22483150	NM_004864
12hr Induction Genes 2.0x	12017	AK289853	BDNF	627	0.4695	0.0003	11735902_a_at	22502388	NM_001143805
12hr Induction Genes 2.0x	12017	NM_003954	MAP3K14	9020	0.4676	0.018	11724902_a_at	22491388	NM_003954
12hr Induction Genes 2.0x	12017	BU615833	LINC00341	79686	0.4618	0.0031	11754198_at	22520684	NM_024633
12hr Induction Genes 2.0x	12017	AK289438	FKBP9 /// FKBP9L	11328	0.4614	0.0027	11748346_s_at	22514832	NM_007270
12hr Induction Genes 2.0x	12017	AF022375	VEGFA	7422	0.4607	0.0004	11741964_s_at	22508450	NM_001025366
12hr Induction Genes 2.0x	12017	BC112053	FKBP9 /// FKBP9L	11328	0.4569	0.0011	11717003_s_at	22483489	NM_007270
12hr Induction Genes 2.0x	12017	NM_005438	FOSL1	8061	0.4561	0.0029	11724477_a_at	22490963	NM_005438
12hr Induction Genes 2.0x	12017	NM_014210	EVI2A	2123	0.4554	0	11733841_a_at	22500327	NM_001003927
12hr Induction Genes 2.0x	12017	BU733597	VEGFA	7422	0.4524	0.0087	11725370_s_at	22491856	NM_001025366
12hr Induction Genes 2.0x	12017	AK294266	FKBP9 /// FKBP9L	11328	0.4504	0.0007	11746782_s_at	22513268	NM_007270
12hr Induction Genes 2.0x	12017	NM_004864	GDF15	9518	0.4498	0.0057	11716663_a_at	22483149	NM_004864
12hr Induction Genes 2.0x	12017	AK300328	FKBP9 /// FKBP9L	11328	0.4496	0.0007	11750763_s_at	22517249	NM_007270
12hr Induction Genes 2.0x	12017	NM_007270	FKBP9 /// FKBP9L	11328	0.4493	0.0084	11717004_s_at	22483490	NM_007270
12hr Induction Genes 2.0x	12017	AF288207	CARS	833	0.4477	0.0037	11737757_a_at	22504243	NM_001014437
12hr Induction Genes 2.0x	12017	NM_153256	C10orf47	254427	0.4465	0.0006	11728844_at	22495330	NM_153256
12hr Induction Genes 2.0x	12017	NM_005438	FOSL1	8061	0.4456	0.0077	11724479_x_at	22490965	NM_005438
12hr Induction Genes 2.0x	12017	NM_144652	LETM2	137994	0.4441	0.0011	11735576_a_at	22502062	NM_001199659
12hr Induction Genes 2.0x	12017	AB028976	SAMD4A	23034	0.4438	0	11745209_a_at	22511695	NM_001161576
12hr Induction Genes 2.0x	12017	NM_001165	BIRC3	330	0.4427	0.0005	11722850_a_at	22489336	NM_001165
12hr Induction Genes 2.0x	12017	AK296851	LAMB3	3914	0.4399	0.0035	11752302_a_at	22518788	NM_000228
12hr Induction Genes 2.0x	12017	NM_001145855	SH3BP2	6452	0.4354	0.0129	11724312_a_at	22490798	NM_001122681
12hr Induction Genes 2.0x	12017	BC031101	TUBE1	51175	0.4311	0.008	11732219_a_at	22498705	NM_016262
12hr Induction Genes 2.0x	12017	BX641017	JHDM1D	80853	0.429	0.0022	11755223_a_at	22521709	NM_030647
12hr Induction Genes 2.0x	12017	AK295222	PSAT1	29968	0.4281	0.0002	11742992_s_at	22509478	NM_021154
12hr Induction Genes 2.0x	12017	AY927612	LOC100127888	100127888	0.4271	0.0002	11757046_a_at	22523532	NR_024470
12hr Induction Genes 2.0x	12017	NM_173576	MKX	283078	0.4258	0.0108	11730032_at	22496518	NM_001242702
12hr Induction Genes 2.0x	12017	AF113132	PSAT1	29968	0.4236	0.0056	11741479_a_at	22507965	NM_021154
12hr Induction Genes 2.0x	12017	AW169241	DDIT4	54541	0.423	0.0201	11743972_a_at	22510458	NM_019058
12hr Induction Genes 2.0x	12017	NM_017947	MOCOS	55034	0.4222	0.0019	11727675_at	22494161	NM_017947
12hr Induction Genes 2.0x	12017	NM_000641	IL11	3589	0.4191	0.0002	11727690_at	22494176	NM_000641
12hr Induction Genes 2.0x	12017	DQ655917	FGF1	2246	0.4187	0.0016	11756653_x_at	22523139	NM_000800
12hr Induction Genes 2.0x	12017	BT006840	PSAT1	29968	0.418	0.0038	11747349_s_at	22513835	NM_021154
12hr Induction Genes 2.0x	12017	NM_003383	VLDLR	7436	0.4177	0.0011	11721181_a_at	22487667	NM_001018056
12hr Induction Genes 2.0x	12017	NM_005438	FOSL1	8061	0.4117	0	11724478_s_at	22490964	NM_005438
12hr Induction Genes 2.0x	12017	NM_001143818	SERPINB2	5055	0.4112	0.0026	11716631_s_at	22483117	NM_001143818
12hr Induction Genes 2.0x	12017	BC034968	AJUBA	84962	0.4105	0	11726013_a_at	22492499	NM_032876
12hr Induction Genes 2.0x	12017	BU621175	C10orf47	254427	0.4075	0	11728843_a_at	22495329	NM_153256
12hr Induction Genes 2.0x	12017	AK295222	PSAT1	29968	0.4065	0.002	11742991_a_at	22509477	NM_021154
12hr Induction Genes 2.0x	12017	NM_002357	MXD1	4084	0.4056	0.0001	11719249_at	22485735	NM_001202513
12hr Induction Genes 2.0x	12017	AK295222	PSAT1	29968	0.4055	0.0008	11742993_x_at	22509479	NM_021154
12hr Induction Genes 2.0x	12017	NM_004235	KLF4	9314	0.3988	0.0025	11719634_a_at	22486120	NM_004235
12hr Induction Genes 2.0x	12017	AK295310	PSAT1	29968	0.3941	0.0026	11751230_a_at	22517716	NM_021154
12hr Induction Genes 2.0x	12017	AY359239	FBXL13	222235	0.392	0.0009	11740804_a_at	22507290	NM_001111038
12hr Induction Genes 2.0x	12017	AK302189	ASNS	440	0.3841	0.0002	11748793_a_at	22515279	NM_001178075
12hr Induction Genes 2.0x	12017	NM_007098	CLTCL1	8218	0.3779	0.0171	11724990_s_at	22491476	NM_001835
12hr Induction Genes 2.0x	12017	NR_003704	MIR3651 /// SNORA84	100124534	0.3759	0.0002	11757146_at	22523632	NR_003704
12hr Induction Genes 2.0x	12017	NM_032876	AJUBA	84962	0.3757	0	11726012_a_at	22492498	NM_032876
12hr Induction Genes 2.0x	12017	NM_145032	FBXL13	222235	0.3608	0.0009	11737032_x_at	22503518	NM_001111038
12hr Induction Genes 2.0x	12017	BC007580	AJUBA	84962	0.3588	0	11745543_x_at	22512029	NM_032876
12hr Induction Genes 2.0x	12017	AK300622	MPP4	58538	0.3583	0.002	11746094_a_at	22512580	NM_033066
12hr Induction Genes 2.0x	12017	BC026317	SLC16A1	6566	0.3566	0.0005	11718656_at	22485142	NM_001166496
12hr Induction Genes 2.0x	12017	M27281	VEGFA	7422	0.3479	0.001	11738414_a_at	22504900	NM_001025366
12hr Induction Genes 2.0x	12017	NM_153228	ANKFN1	162282	0.3255	0.0126	11737122_at	22503608	NM_153228
12hr Induction Genes 2.0x	12017	NM_153742	CTH	1491	0.3157	0.0101	11742278_a_at	22508764	NM_001190463
12hr Induction Genes 2.0x	12017	NM_003877	SOCS2	8835	0.3138	0.0007	11735148_a_at	22501634	NM_001270467
12hr Induction Genes 2.0x	12017	NM_001017402	LAMB3	3914	0.3055	0.0006	11719487_a_at	22485973	NM_000228
12hr Induction Genes 2.0x	12017	AK095647	PLCXD2	257068	0.3006	0.0024	11743841_at	22510327	NM_001134478
12hr Induction Genes 2.0x	12017	BC063625	KRTAP2-4 /// LOC730755	730755	0.2742	0	11746283_s_at	22512769	NM_001165252
12hr Induction Genes 2.0x	12017	CR623093	FKBP9	11328	0.2695	0	11763728_a_at	22530214	NM_007270
12hr Induction Genes 2.0x	12017	U54804	HAS2	3037	0.254	0.0012	11740312_at	22506798	NM_005328
12hr Induction Genes 2.0x	12017	AK297724	HAS2	3037	0.2424	0.0032	11749553_a_at	22516039	NM_005328
12hr Induction Genes 2.0x	12017	NM_021158	TRIB3	57761	0.233	0.0003	11719811_a_at	22486297	NM_021158
12hr Induction Genes 2.0x	12017	BC069353	HAS2	3037	0.2234	0.0052	11740311_at	22506797	NM_005328
12hr Induction Genes 2.0x	12017	BE874862	G0S2	50486	0.2101	0.0008	11744219_at	22510705	NM_015714
12hr Induction Genes 2.0x	12017	CR542179	G0S2	50486	0.2072	0	11754074_s_at	22520560	NM_015714

## Sheet: 24hr
GENELIST_NAME	EXPID	GENEBANK ACC	GENE NAME	LOCUSID	FOLD	PVALUE	GEN_ID_MFR	SPOTID	REFSEQ
24hr Induction Genes 2.0x	12017	AK295491	SPP1	6696	37.5763	0	11746506_a_at	22512992	NM_000582
24hr Induction Genes 2.0x	12017	AK075463	SPP1	6696	28.9864	0	11754604_x_at	22521090	NM_000582
24hr Induction Genes 2.0x	12017	BC017387	SPP1	6696	27.5192	0.0006	11727790_x_at	22494276	NM_000582
24hr Induction Genes 2.0x	12017	NM_025237	SOST	50964	26.5277	0	11727328_at	22493814	NM_025237			After deleting repeated "REFSEQ", upregulated genes: 420 downregulated genes: 89
24hr Induction Genes 2.0x	12017	AA827918	RASSF2	9770	26.1133	0.0005	11739232_x_at	22505718	NM_014737
24hr Induction Genes 2.0x	12017	NM_001870	CPA3	1359	25.567	0.0004	11727537_at	22494023	NM_001870
24hr Induction Genes 2.0x	12017	AY154471	RASSF2	9770	23.6891	0.0013	11746639_a_at	22513125	NM_014737
24hr Induction Genes 2.0x	12017	NM_006403	NEDD9	4739	21.89	0	11725057_s_at	22491543	NM_001142393
24hr Induction Genes 2.0x	12017	NM_020167	NMUR2	56923	20.369	0.0001	11729497_at	22495983	NM_020167
24hr Induction Genes 2.0x	12017	M25756	SCG2	7857	19.899	0	11720030_a_at	22486516	NM_003469
24hr Induction Genes 2.0x	12017	BX379768	SPP1	6696	19.6458	0.0001	11755730_x_at	22522216	NM_000582
24hr Induction Genes 2.0x	12017	NM_014059	RGCC	28984	18.1644	0.0007	11717582_a_at	22484068	NM_014059
24hr Induction Genes 2.0x	12017	AK290090	SPP1	6696	17.8758	0.0003	11737944_x_at	22504430	NM_000582
24hr Induction Genes 2.0x	12017	NM_002729	HHEX	3087	17.6312	0.0009	11722321_at	22488807	NM_002729
24hr Induction Genes 2.0x	12017	NM_003914	CCNA1	8900	16.8466	0	11732350_a_at	22498836	NM_001111045
24hr Induction Genes 2.0x	12017	AK225812	SORBS2	8470	16.5979	0	11740326_x_at	22506812	NM_001145670
24hr Induction Genes 2.0x	12017	AK290090	SPP1	6696	15.4249	0.0003	11737943_a_at	22504429	NM_000582
24hr Induction Genes 2.0x	12017	NM_001145671	SORBS2	8470	15.3864	0.0007	11735570_a_at	22502056	NM_001145670
24hr Induction Genes 2.0x	12017	L76380	CALCRL	10203	14.8927	0	11730274_at	22496760	NM_005795
24hr Induction Genes 2.0x	12017	NM_005988	SPRR2A	6700	14.007	0	11729713_x_at	22496199	NM_005988
24hr Induction Genes 2.0x	12017	BC011883	SORBS2	8470	12.6669	0	11735572_x_at	22502058	NM_001145670
24hr Induction Genes 2.0x	12017	NM_002820	PTHLH	5744	12.5138	0.0004	11731897_a_at	22498383	NM_002820
24hr Induction Genes 2.0x	12017	NM_005988	SPRR2A	6700	12.1634	0	11729712_at	22496198	NM_005988
24hr Induction Genes 2.0x	12017	NM_005795	CALCRL	10203	11.9511	0.0013	11730275_at	22496761	NM_005795
24hr Induction Genes 2.0x	12017	BC006478	CALB1	793	11.3513	0	11725979_a_at	22492465	NM_004929
24hr Induction Genes 2.0x	12017	NM_014398	LAMP3	27074	10.8586	0	11725429_at	22491915	NM_014398
24hr Induction Genes 2.0x	12017	AK296461	SORBS2	8470	10.6536	0.0016	11741262_x_at	22507748	NM_001145670
24hr Induction Genes 2.0x	12017	BC073163	GBP2	2634	10.12	0.0006	11719447_s_at	22485933	NM_004120
24hr Induction Genes 2.0x	12017	BC011883	SORBS2	8470	9.7048	0	11735571_a_at	22502057	NM_001145670
24hr Induction Genes 2.0x	12017	NM_138786	TM4SF18	116441	9.6554	0	11725403_at	22491889	NM_001184723
24hr Induction Genes 2.0x	12017	AK296461	SORBS2	8470	9.3588	0.0001	11741261_a_at	22507747	NM_001145670
24hr Induction Genes 2.0x	12017	NM_001723	DST /// LOC100652766	100652766	9.3508	0.0011	11727655_s_at	22494141	NM_001144769
24hr Induction Genes 2.0x	12017	U16261	IL24	11009	9.1507	0.0009	11731834_a_at	22498320	NM_001185156
24hr Induction Genes 2.0x	12017	BC043216	VSIG1	340547	9.0262	0.0006	11734855_at	22501341	NM_001170553
24hr Induction Genes 2.0x	12017	NM_001955	EDN1	1906	8.389	0	11726024_at	22492510	NM_001168319
24hr Induction Genes 2.0x	12017	AY237723	IL24	11009	8.253	0.0001	11754176_a_at	22520662	NM_001185156
24hr Induction Genes 2.0x	12017	AF165281	ABCA1	19	8.0913	0.0016	11739503_at	22505989	NM_005502
24hr Induction Genes 2.0x	12017	DB296057	PLSCR1	5359	8.0636	0.0005	11757872_s_at	22524358	NM_021105
24hr Induction Genes 2.0x	12017	NM_001008540	CXCR4	7852	7.8599	0.0003	11728190_s_at	22494676	NM_001008540
24hr Induction Genes 2.0x	12017	AK126745	LRIG1	26018	7.7372	0	11755110_a_at	22521596	NM_015541
24hr Induction Genes 2.0x	12017	BC009720	EDN1	1906	7.7291	0.0004	11726023_a_at	22492509	NM_001168319
24hr Induction Genes 2.0x	12017	NM_173490	TMEM171	134285	7.6756	0.0001	11732818_at	22499304	NM_001161342
24hr Induction Genes 2.0x	12017	NM_178561	CTAGE6P	340307	7.6032	0	11735769_at	22502255	NM_178561
24hr Induction Genes 2.0x	12017	AL832451	GBP2	2634	7.5838	0	11762406_s_at	22528892	NM_004120
24hr Induction Genes 2.0x	12017	CR598109	TNFSF10	8743	7.469	0.0004	11743730_at	22510216	NM_001190942
24hr Induction Genes 2.0x	12017	NM_002214	ITGB8	3696	7.3018	0.0005	11722503_at	22488989	NM_002214
24hr Induction Genes 2.0x	12017	AU134691	TNFSF10	8743	7.1252	0	11743731_a_at	22510217	NM_001190942
24hr Induction Genes 2.0x	12017	BC017901	PLSCR1	5359	6.9724	0.0009	11759765_at	22526251	NM_021105
24hr Induction Genes 2.0x	12017	BT007067	IL8	3576	6.9528	0.0013	11754026_a_at	22520512	NM_000584
24hr Induction Genes 2.0x	12017	NM_000576	IL1B	3553	6.9136	0.0021	11719916_at	22486402	NM_000576
24hr Induction Genes 2.0x	12017	L43821	NEDD9	4739	6.9082	0	11725058_a_at	22491544	NM_001142393
24hr Induction Genes 2.0x	12017	AW299767	CALB1	793	6.8952	0	11754472_a_at	22520958	NM_004929
24hr Induction Genes 2.0x	12017	g22035683	AREG /// AREGB	374	6.8854	0.0016	11715306_s_at	22481792	NM_001657
24hr Induction Genes 2.0x	12017	AK296085	TNFSF10	8743	6.7339	0	11747952_x_at	22514438	NM_001190942
24hr Induction Genes 2.0x	12017	NM_001037132	NRCAM	4897	6.6987	0.0001	11724337_s_at	22490823	NM_001037132
24hr Induction Genes 2.0x	12017	NM_006398	GABBR1 /// UBD	10537	6.6863	0	11723069_at	22489555	NM_001470
24hr Induction Genes 2.0x	12017	NM_001511	CXCL1	2919	6.6321	0	11719366_s_at	22485852	NM_001511
24hr Induction Genes 2.0x	12017	AY371042	ERVK-19 /// ERVK-9	100616102	6.63	0.0031	11759594_at	22526080	AY371042.1
24hr Induction Genes 2.0x	12017	M99435	TLE1	7088	6.5591	0.0008	11740414_a_at	22506900	NM_005077
24hr Induction Genes 2.0x	12017	NM_058229	FBXO32	114907	6.5128	0	11719394_a_at	22485880	NM_001242463
24hr Induction Genes 2.0x	12017	NM_006945	SPRR2D	6703	6.4407	0.0001	11729266_x_at	22495752	NM_006945
24hr Induction Genes 2.0x	12017	AK297734	STC1	6781	6.1829	0	11750279_a_at	22516765	NM_003155
24hr Induction Genes 2.0x	12017	NM_001128305	PLSCR4	57088	6.1196	0.0001	11741315_a_at	22507801	NM_001128304
24hr Induction Genes 2.0x	12017	AY358250	SHC4	399694	6.1059	0.0004	11747231_a_at	22513717	NM_203349
24hr Induction Genes 2.0x	12017	BT007067	IL8	3576	5.9382	0	11763226_x_at	22529712	NM_000584
24hr Induction Genes 2.0x	12017	NM_003107	SOX4	6659	5.8453	0	11719562_at	22486048	NM_003107
24hr Induction Genes 2.0x	12017	AI479863	SIPA1L2	57568	5.8294	0.0001	11744184_a_at	22510670	NM_020808
24hr Induction Genes 2.0x	12017	AI537264	PLSCR1	5359	5.756	0	11743911_a_at	22510397	NM_021105
24hr Induction Genes 2.0x	12017	AB033089	FSTL5	56884	5.6874	0.0007	11743826_at	22510312	NM_001128427
24hr Induction Genes 2.0x	12017	BG184619	PLSCR1	5359	5.6074	0.0002	11757533_x_at	22524019	NM_021105
24hr Induction Genes 2.0x	12017	BF678927	SOX4	6659	5.5704	0	11719561_s_at	22486047	NM_003107
24hr Induction Genes 2.0x	12017	AK300181	PLSCR1	5359	5.5152	0	11751652_x_at	22518138	NM_021105
24hr Induction Genes 2.0x	12017	BC029044	STC1	6781	5.4679	0	11724196_s_at	22490682	NM_003155
24hr Induction Genes 2.0x	12017	AW150758	DDX60	55601	5.4637	0.0001	11744236_a_at	22510722	NM_017631
24hr Induction Genes 2.0x	12017	AK300181	PLSCR1	5359	5.3947	0.0002	11751651_s_at	22518137	NM_021105
24hr Induction Genes 2.0x	12017	NM_003155	STC1	6781	5.3807	0	11724197_at	22490683	NM_003155
24hr Induction Genes 2.0x	12017	N20862	SLC2A12	154091	5.2803	0	11730239_a_at	22496725	NM_145176
24hr Induction Genes 2.0x	12017	NM_017839	LPCAT2	54947	5.2637	0.0001	11725417_a_at	22491903	NM_017839
24hr Induction Genes 2.0x	12017	AK023271	LPCAT2	54947	5.183	0.0072	11725419_a_at	22491905	NM_017839
24hr Induction Genes 2.0x	12017	AF272363	NMUR2	56923	5.1554	0.0001	11729498_at	22495984	NM_020167
24hr Induction Genes 2.0x	12017	U46768	STC1	6781	5.1187	0	11724198_a_at	22490684	NM_003155
24hr Induction Genes 2.0x	12017	BF678927	SOX4	6659	5.0928	0.0006	11719560_at	22486046	NM_003107
24hr Induction Genes 2.0x	12017	J03802	PTHLH	5744	5.0501	0.0004	11740245_a_at	22506731	NM_002820
24hr Induction Genes 2.0x	12017	BC036773	OPN3	23596	5.0402	0	11744481_s_at	22510967	NM_001030011
24hr Induction Genes 2.0x	12017	BC032839	IFIT2	3433	4.9998	0	11721874_at	22488360	NM_001547
24hr Induction Genes 2.0x	12017	NM_000584	IL8	3576	4.9926	0	11718841_s_at	22485327	NM_000584
24hr Induction Genes 2.0x	12017	AK092282	TM4SF18	116441	4.9631	0.0042	11758933_at	22525419	NM_001184723
24hr Induction Genes 2.0x	12017	BE464297	S1PR1	1901	4.9498	0.0066	11743816_s_at	22510302	NM_001400
24hr Induction Genes 2.0x	12017	AK290358	SLC26A2	1836	4.9261	0.0023	11720105_a_at	22486591	NM_000112
24hr Induction Genes 2.0x	12017	AK098450	MMP1	4312	4.8976	0	11755928_s_at	22522414	NM_001145938
24hr Induction Genes 2.0x	12017	NM_206966	C5orf46	389336	4.8471	0.0003	11735867_a_at	22502353	NM_206966
24hr Induction Genes 2.0x	12017	NM_030915	LBH	81606	4.8421	0	11716162_at	22482648	NM_030915
24hr Induction Genes 2.0x	12017	DB350079	IFI44	10561	4.831	0	11746088_a_at	22512574	NM_006417
24hr Induction Genes 2.0x	12017	AW469192	SOX4	6659	4.8219	0	11757741_s_at	22524227	NM_003107
24hr Induction Genes 2.0x	12017	NM_000067	CA2	760	4.8109	0	11733115_a_at	22499601	NM_000067
24hr Induction Genes 2.0x	12017	BC094715	CEBPD	1052	4.8018	0.0009	11752869_s_at	22519355	NM_005195
24hr Induction Genes 2.0x	12017	BC059390	SLC26A2	1836	4.7866	0.0009	11720106_a_at	22486592	NM_000112
24hr Induction Genes 2.0x	12017	NM_005585	SMAD6	4091	4.7788	0.0018	11730338_a_at	22496824	NM_001142861
24hr Induction Genes 2.0x	12017	NM_015123	FRMD4B	23150	4.6999	0.0001	11731574_at	22498060	NM_015123
24hr Induction Genes 2.0x	12017	NM_001448	GPC4	2239	4.6558	0.0002	11727403_at	22493889	NM_001448
24hr Induction Genes 2.0x	12017	NM_002600	PDE4B	5142	4.6389	0.006	11724095_a_at	22490581	NM_001037339
24hr Induction Genes 2.0x	12017	NM_178140	PDZD2	23037	4.6369	0	11718912_a_at	22485398	NM_015022
24hr Induction Genes 2.0x	12017	NM_006945	SPRR2D	6703	4.6352	0	11729265_at	22495751	NM_006945
24hr Induction Genes 2.0x	12017	U64317	NEDD9	4739	4.6212	0	11725056_a_at	22491542	NM_001142393
24hr Induction Genes 2.0x	12017	NM_004753	DHRS3	9249	4.5685	0.004	11716835_a_at	22483321	NM_004753
24hr Induction Genes 2.0x	12017	AI274876	SOX4	6659	4.5578	0.0014	11758525_s_at	22525011	NM_003107
24hr Induction Genes 2.0x	12017	AL832572	MOB3B	79817	4.5469	0.002	11725168_s_at	22491654	NM_024761
24hr Induction Genes 2.0x	12017	AW070460	CD55	1604	4.5223	0.0002	11746180_a_at	22512666	NM_000574
24hr Induction Genes 2.0x	12017	BI492527	MAF	4094	4.5039	0	11733088_at	22499574	NM_001031804
24hr Induction Genes 2.0x	12017	NM_001005242	PKP2	5318	4.4727	0	11726131_a_at	22492617	NM_001005242
24hr Induction Genes 2.0x	12017	NM_023112	OTUB2	78990	4.466	0.0012	11725831_at	22492317	NM_023112
24hr Induction Genes 2.0x	12017	AY082381	NOV	4856	4.4618	0	11723033_at	22489519	NM_002514
24hr Induction Genes 2.0x	12017	M14648	ITGAV	3685	4.4286	0.003	11716300_x_at	22482786	NM_001144999
24hr Induction Genes 2.0x	12017	BC105109	CEBPD	1052	4.3956	0.0015	11743135_s_at	22509621	NM_005195
24hr Induction Genes 2.0x	12017	BF185501	SCD	6319	4.3373	0.0001	11756174_s_at	22522660	NM_005063
24hr Induction Genes 2.0x	12017	BC047620	GUCY1B3	2983	4.3307	0	11726581_a_at	22493067	NM_000857
24hr Induction Genes 2.0x	12017	NM_013230	CD24	100133941	4.3138	0	11715918_s_at	22482404	NM_013230
24hr Induction Genes 2.0x	12017	NM_031845	MAP2	4133	4.2792	0.0001	11736559_a_at	22503045	NM_001039538
24hr Induction Genes 2.0x	12017	AL833262	SYNM	23336	4.2175	0.0004	11755757_a_at	22522243	NM_015286
24hr Induction Genes 2.0x	12017	BC001288	CD55	1604	4.2083	0	11728701_a_at	22495187	NM_000574
24hr Induction Genes 2.0x	12017	NM_022475	HHIP	64399	4.2051	0.0002	11736086_a_at	22502572	NM_022475
24hr Induction Genes 2.0x	12017	NM_023112	OTUB2	78990	4.1813	0.0001	11725832_s_at	22492318	NM_023112
24hr Induction Genes 2.0x	12017	AK293357	RARRES3	5920	4.1709	0.0002	11748907_a_at	22515393	NM_004585
24hr Induction Genes 2.0x	12017	AK300621	CD55	1604	4.1621	0	11762060_x_at	22528546	NM_000574
24hr Induction Genes 2.0x	12017	NM_001957	EDNRA	1909	4.1404	0	11719488_at	22485974	NM_001166055
24hr Induction Genes 2.0x	12017	AI719730	GUCY1A3	2982	4.1277	0.0053	11722138_s_at	22488624	NM_000856
24hr Induction Genes 2.0x	12017	AK292998	CALCRL	10203	4.1266	0.0009	11747993_a_at	22514479	NM_005795
24hr Induction Genes 2.0x	12017	AK295742	SORBS2	8470	4.1153	0.0023	11748821_a_at	22515307	NM_001145670
24hr Induction Genes 2.0x	12017	U88576	CD55	1604	4.1014	0	11755084_x_at	22521570	NM_000574
24hr Induction Genes 2.0x	12017	BX648278	FOXO1	2308	4.094	0.0002	11755772_a_at	22522258	NM_002015
24hr Induction Genes 2.0x	12017	BC013734	PTGS2	5743	4.0783	0.0002	11724038_a_at	22490524	NM_000963
24hr Induction Genes 2.0x	12017	NM_001100829	TMEM170B	100113407	4.0724	0.0051	11731258_at	22497744	NM_001100829
24hr Induction Genes 2.0x	12017	BX647203	DNAJC6	9829	4.056	0	11745300_a_at	22511786	NM_001256864
24hr Induction Genes 2.0x	12017	NM_022168	IFIH1	64135	4.0367	0.0031	11724346_a_at	22490832	NM_022168
24hr Induction Genes 2.0x	12017	AB240567	CD55	1604	4.0356	0	11752832_x_at	22519318	NM_000574
24hr Induction Genes 2.0x	12017	NM_152737	RNF182	221687	4	0.0001	11737774_a_at	22504260	NM_001165032
24hr Induction Genes 2.0x	12017	NM_001062	TCN1	6947	3.9943	0.0001	11726124_at	22492610	NM_001062
24hr Induction Genes 2.0x	12017	NM_006417	IFI44	10561	3.9857	0	11719886_a_at	22486372	NM_006417
24hr Induction Genes 2.0x	12017	AK301220	IL7R	3575	3.985	0.0028	11751647_a_at	22518133	NM_002185
24hr Induction Genes 2.0x	12017	BX445017	TUBA1A	7846	3.97	0	11757913_x_at	22524399	NM_001270399
24hr Induction Genes 2.0x	12017	NM_018018	SLC38A4	55089	3.965	0.0005	11725512_a_at	22491998	NM_001143824
24hr Induction Genes 2.0x	12017	NM_018433	KDM3A	55818	3.9642	0.0002	11716573_a_at	22483059	NM_001146688
24hr Induction Genes 2.0x	12017	AA166678	SIPA1L2	57568	3.9554	0.0001	11757924_s_at	22524410	NM_020808
24hr Induction Genes 2.0x	12017	AK298688	SGK1	6446	3.9212	0	11737749_a_at	22504235	NM_001143676
24hr Induction Genes 2.0x	12017	BX640696	SLC26A2	1836	3.905	0	11754595_s_at	22521081	NM_000112
24hr Induction Genes 2.0x	12017	NM_001795	CDH5	1003	3.8761	0.0007	11721651_at	22488137	NM_001114117
24hr Induction Genes 2.0x	12017	NM_001102445	RGS4	5999	3.8605	0.0025	11732993_a_at	22499479	NM_001102445
24hr Induction Genes 2.0x	12017	NM_001010000	ARHGAP28	79822	3.8545	0	11723981_s_at	22490467	NM_001010000
24hr Induction Genes 2.0x	12017	NM_001143678	SGK1	6446	3.8316	0	11737750_s_at	22504236	NM_001143676
24hr Induction Genes 2.0x	12017	AK025078	SLC26A2	1836	3.7934	0.0001	11754594_a_at	22521080	NM_000112
24hr Induction Genes 2.0x	12017	BC017166	GPC4	2239	3.7696	0.0071	11727404_a_at	22493890	NM_001448
24hr Induction Genes 2.0x	12017	NM_001008540	CXCR4	7852	3.7536	0.0004	11728191_x_at	22494677	NM_001008540
24hr Induction Genes 2.0x	12017	AA532381	ID4	3400	3.7532	0.0003	11764110_s_at	22530596	NM_001546
24hr Induction Genes 2.0x	12017	NM_000963	PTGS2	5743	3.7513	0	11724037_at	22490523	NM_000963
24hr Induction Genes 2.0x	12017	NM_001143942	RBM24	221662	3.7444	0.0001	11728873_s_at	22495359	NM_001143941
24hr Induction Genes 2.0x	12017	AK297723	MMP1	4312	3.7438	0	11741897_a_at	22508383	NM_001145938
24hr Induction Genes 2.0x	12017	NM_005627	SGK1	6446	3.7404	0	11733698_s_at	22500184	NM_001143676
24hr Induction Genes 2.0x	12017	AF104266	LPHN2	23266	3.7284	0.0004	11745273_a_at	22511759	NM_012302
24hr Induction Genes 2.0x	12017	NM_178140	PDZD2	23037	3.7145	0.0007	11718913_s_at	22485399	NM_015022
24hr Induction Genes 2.0x	12017	BC105109	CEBPD	1052	3.7012	0.0005	11743136_x_at	22509622	NM_005195
24hr Induction Genes 2.0x	12017	NM_001143676	SGK1	6446	3.6989	0	11715931_s_at	22482417	NM_001143676
24hr Induction Genes 2.0x	12017	AW780256	CADPS2	93664	3.697	0.0001	11754806_s_at	22521292	NM_001009571
24hr Induction Genes 2.0x	12017	CR626841	RTN1	6252	3.6932	0.0026	11756827_a_at	22523313	NM_001243115
24hr Induction Genes 2.0x	12017	AK302527	IFI44	10561	3.6795	0.0001	11748003_a_at	22514489	NM_006417
24hr Induction Genes 2.0x	12017	NM_014951	ZNF365	22891	3.6701	0	11731263_a_at	22497749	NM_014951
24hr Induction Genes 2.0x	12017	NM_003641	IFITM1	8519	3.6635	0.0008	11715670_a_at	22482156	NM_003641
24hr Induction Genes 2.0x	12017	NM_020663	RHOJ	57381	3.6472	0.0004	11740182_a_at	22506668	NM_020663
24hr Induction Genes 2.0x	12017	NM_000325	PITX2	5308	3.6403	0.0003	11729935_a_at	22496421	NM_000325
24hr Induction Genes 2.0x	12017	NM_014332	SMPX	23676	3.6169	0.0004	11726768_at	22493254	NM_014332
24hr Induction Genes 2.0x	12017	BC069999	IL7R	3575	3.587	0.0001	11733187_a_at	22499673	NM_002185
24hr Induction Genes 2.0x	12017	BF439987	DCLK1	9201	3.5843	0	11728342_at	22494828	NM_001195415
24hr Induction Genes 2.0x	12017	AK300068	RBM24	221662	3.5655	0.0017	11751308_a_at	22517794	NM_001143941
24hr Induction Genes 2.0x	12017	NM_001085486	SEPP1	6414	3.5591	0	11741874_x_at	22508360	NM_001085486
24hr Induction Genes 2.0x	12017	DQ280491	CALCRL	10203	3.5482	0.0006	11761796_at	22528282	NM_005795
24hr Induction Genes 2.0x	12017	AV682654	CFH /// CFHR1	3075	3.5275	0.0008	11757990_s_at	22524476	NM_000186
24hr Induction Genes 2.0x	12017	BQ446236	CYB5R2	51700	3.518	0.0023	11757682_a_at	22524168	NM_001001336
24hr Induction Genes 2.0x	12017	EF208215	KLF5	688	3.5148	0.0001	11744572_a_at	22511058	NM_001730
24hr Induction Genes 2.0x	12017	AF172398	F11R	50848	3.4963	0	11720460_x_at	22486946	NM_016946
24hr Induction Genes 2.0x	12017	NM_021571	CARD18	59082	3.4714	0.0018	11729978_at	22496464	NM_021571
24hr Induction Genes 2.0x	12017	BU730835	CFH /// CFHR1	3075	3.4505	0	11743846_s_at	22510332	NM_000186
24hr Induction Genes 2.0x	12017	AK296900	KLF5	688	3.442	0.0008	11748761_a_at	22515247	NM_001730
24hr Induction Genes 2.0x	12017	W92993	RHOJ	57381	3.4414	0.0004	11759345_at	22525831	NM_020663
24hr Induction Genes 2.0x	12017	NM_000877	IL1R1	3554	3.434	0	11718025_at	22484511	NM_000877
24hr Induction Genes 2.0x	12017	AK024645	HHIP	64399	3.4235	0.0001	11756007_a_at	22522493	NM_022475
24hr Induction Genes 2.0x	12017	NM_032813	TMTC4	84899	3.3928	0.0016	11737296_s_at	22503782	NM_001079669
24hr Induction Genes 2.0x	12017	NM_206921	CEP85L	387119	3.3824	0.0142	11740806_a_at	22507292	NM_001042475
24hr Induction Genes 2.0x	12017	CR596199	LPHN2	23266	3.3682	0.0006	11743568_a_at	22510054	NM_012302
24hr Induction Genes 2.0x	12017	NM_002849	PTPRR	5801	3.368	0	11728787_a_at	22495273	NM_001207015
24hr Induction Genes 2.0x	12017	AK302156	SHC4	399694	3.3621	0.0001	11748299_a_at	22514785	NM_203349
24hr Induction Genes 2.0x	12017	NM_003641	IFITM1	8519	3.3592	0.0002	11715671_x_at	22482157	NM_003641
24hr Induction Genes 2.0x	12017	AK295864	DST /// LOC100652766	100652766	3.3574	0.0004	11760436_a_at	22526922	NM_001144769
24hr Induction Genes 2.0x	12017	AI249114	CXADR	1525	3.3545	0.0037	11758000_s_at	22524486	NM_001207063
24hr Induction Genes 2.0x	12017	NM_003937	KYNU	8942	3.3504	0.0012	11719120_a_at	22485606	NM_001032998
24hr Induction Genes 2.0x	12017	D37931	RNASE4	6038	3.3491	0.0001	11741447_s_at	22507933	NM_002937
24hr Induction Genes 2.0x	12017	NM_032199	ARID5B	84159	3.3414	0	11718927_a_at	22485413	NM_001244638
24hr Induction Genes 2.0x	12017	NM_006009	TUBA1A	7846	3.3398	0.0001	11727362_x_at	22493848	NM_001270399
24hr Induction Genes 2.0x	12017	AK300431	IFIT2	3433	3.3393	0.0002	11721873_at	22488359	NM_001547
24hr Induction Genes 2.0x	12017	BU730835	CFH	3075	3.3384	0.0002	11743847_x_at	22510333	NM_000186
24hr Induction Genes 2.0x	12017	NM_006033	LIPG	9388	3.336	0.0001	11725469_at	22491955	NM_006033
24hr Induction Genes 2.0x	12017	BC142993	KLHL24	54800	3.3314	0.0061	11729691_a_at	22496177	NM_017644
24hr Induction Genes 2.0x	12017	BC005254	CLEC2B	9976	3.3145	0	11721302_a_at	22487788	NM_005127
24hr Induction Genes 2.0x	12017	NM_016150	ASB2	51676	3.3083	0	11725239_a_at	22491725	NM_001202429
24hr Induction Genes 2.0x	12017	NM_001565	CXCL10	3627	3.3067	0.0033	11720298_at	22486784	NM_001565
24hr Induction Genes 2.0x	12017	CR610618	MAML2	84441	3.3032	0.0023	11759346_a_at	22525832	NM_032427
24hr Induction Genes 2.0x	12017	BT006880	CXCL1 /// CXCL2	2919	3.3002	0	11763250_x_at	22529736	NM_001511
24hr Induction Genes 2.0x	12017	AB240568	CD55	1604	3.2988	0	11762726_x_at	22529212	NM_000574
24hr Induction Genes 2.0x	12017	BM674255	SOX4	6659	3.295	0.0004	11719563_a_at	22486049	NM_003107
24hr Induction Genes 2.0x	12017	U76996	KCNK1	3775	3.2894	0.0025	11747096_a_at	22513582	NM_002245
24hr Induction Genes 2.0x	12017	BU686994	NUAK1	9891	3.2696	0.0004	11739973_s_at	22506459	NM_014840
24hr Induction Genes 2.0x	12017	NM_005308	GRK5	2869	3.2634	0.0008	11729227_a_at	22495713	NM_005308
24hr Induction Genes 2.0x	12017	BC044919	PNRC1	10957	3.2607	0.0001	11749039_x_at	22515525	NM_006813
24hr Induction Genes 2.0x	12017	NM_018444	PDP1	54704	3.2579	0.0025	11722231_at	22488717	NM_001161778
24hr Induction Genes 2.0x	12017	AK299139	PKP2	5318	3.2574	0.0021	11726130_a_at	22492616	NM_001005242
24hr Induction Genes 2.0x	12017	AK304641	SERPINB1	1992	3.2485	0.0022	11748280_a_at	22514766	NM_030666
24hr Induction Genes 2.0x	12017	BE464297	S1PR1	1901	3.2254	0.0013	11743815_a_at	22510301	NM_001400
24hr Induction Genes 2.0x	12017	NM_001135733	TP53INP1	94241	3.2228	0.0013	11718610_at	22485096	NM_001135733
24hr Induction Genes 2.0x	12017	AK299731	RND3	390	3.2092	0.0001	11753427_a_at	22519913	NM_001254738
24hr Induction Genes 2.0x	12017	NM_006207	PDGFRL	5157	3.2082	0.0001	11723535_at	22490021	NM_006207
24hr Induction Genes 2.0x	12017	AI446767	CXCL2	2920	3.2017	0.0068	11744128_x_at	22510614	NM_002089
24hr Induction Genes 2.0x	12017	AI660920	ITGAV	3685	3.1868	0	11757515_s_at	22524001	NM_001144999
24hr Induction Genes 2.0x	12017	AK302550	ITGAV	3685	3.1859	0.0025	11752333_a_at	22518819	NM_001144999
24hr Induction Genes 2.0x	12017	BX417576	PTPRR	5801	3.1805	0.0011	11748647_a_at	22515133	NM_001207015
24hr Induction Genes 2.0x	12017	CR749817	SEL1L3	23231	3.1801	0	11753915_a_at	22520401	NM_015187
24hr Induction Genes 2.0x	12017	NM_178140	PDZD2	23037	3.1603	0.0003	11718914_x_at	22485400	NM_015022
24hr Induction Genes 2.0x	12017	NM_006084	IRF9	10379	3.1413	0.005	11720209_at	22486695	NM_006084
24hr Induction Genes 2.0x	12017	NM_003811	TNFSF9	8744	3.135	0.0001	11735140_at	22501626	NM_003811
24hr Induction Genes 2.0x	12017	CF552454	PALMD	54873	3.1221	0.0005	11718869_x_at	22485355	NM_017734
24hr Induction Genes 2.0x	12017	AL582024	SEL1L3	23231	3.1101	0.0044	11743915_s_at	22510401	NM_015187
24hr Induction Genes 2.0x	12017	AY358203	SOST	50964	3.1073	0.0009	11727329_at	22493815	NM_025237
24hr Induction Genes 2.0x	12017	NM_015376	RASGRP3	25780	3.1067	0.0093	11740140_a_at	22506626	NM_001139488
24hr Induction Genes 2.0x	12017	AI027957	SHC4	399694	3.1059	0.0006	11758507_s_at	22524993	NM_203349
24hr Induction Genes 2.0x	12017	BU737011	KLHL24	54800	3.0908	0.0009	11757390_s_at	22523876	NM_017644
24hr Induction Genes 2.0x	12017	NM_003733	OASL	8638	3.0892	0.0027	11726364_x_at	22492850	NM_001261825
24hr Induction Genes 2.0x	12017	NM_015345	DAAM2	23500	3.0821	0.0044	11724178_a_at	22490664	NM_001201427
24hr Induction Genes 2.0x	12017	AW025579	BICC1	80114	3.069	0.0001	11763406_s_at	22529892	NM_001080512
24hr Induction Genes 2.0x	12017	NM_198336	INSIG1	3638	3.0585	0.0004	11716337_s_at	22482823	NM_005542
24hr Induction Genes 2.0x	12017	NM_001042459	FILIP1L	11259	3.0493	0.0004	11718904_s_at	22485390	NM_001042459
24hr Induction Genes 2.0x	12017	AK294289	NOV	4856	3.036	0.0006	11747259_a_at	22513745	NM_002514
24hr Induction Genes 2.0x	12017	AB096957	KRTAP20-2	337976	3.0327	0.0003	11759383_at	22525869	NM_181616
24hr Induction Genes 2.0x	12017	AK095159	SDR16C5	195814	3.0257	0.0002	11754879_a_at	22521365	NM_138969
24hr Induction Genes 2.0x	12017	BC098418	KIF6	221458	3.0187	0.0004	11760723_at	22527209	NM_145027
24hr Induction Genes 2.0x	12017	CF529882	TLR4	7099	3.0166	0.0133	11743197_at	22509683	NM_003266
24hr Induction Genes 2.0x	12017	NM_001338	CXADR	1525	3.0123	0	11720637_x_at	22487123	NM_001207063
24hr Induction Genes 2.0x	12017	U58855	GUCY1A3	2982	3	0	11739830_a_at	22506316	NM_000856
24hr Induction Genes 2.0x	12017	Y07958	ID4	3400	2.9986	0.0007	11721688_at	22488174	NM_001546
24hr Induction Genes 2.0x	12017	BC126411	ITGB4	3691	2.9979	0.0044	11733098_a_at	22499584	NM_000213
24hr Induction Genes 2.0x	12017	NM_001546	ID4	3400	2.9954	0.0061	11721687_at	22488173	NM_001546
24hr Induction Genes 2.0x	12017	NM_005574	LMO2	4005	2.9891	0.0002	11730469_s_at	22496955	NM_001142315
24hr Induction Genes 2.0x	12017	AK304276	KDM3A	55818	2.9851	0.0002	11750576_a_at	22517062	NM_001146688
24hr Induction Genes 2.0x	12017	AK293052	RBM24	221662	2.983	0.0001	11728872_a_at	22495358	NM_001143941
24hr Induction Genes 2.0x	12017	BC092440	SVIL	6840	2.9805	0.0002	11745431_a_at	22511917	NM_003174
24hr Induction Genes 2.0x	12017	NM_004787	SLIT2	9353	2.9768	0	11721399_a_at	22487885	NM_004787
24hr Induction Genes 2.0x	12017	BM679039	PBX1	5087	2.9717	0.0037	11719414_a_at	22485900	NM_001204961
24hr Induction Genes 2.0x	12017	NM_013993	DDR1 /// MIR4640	100616237	2.9716	0.0024	11716708_a_at	22483194	NM_001202521
24hr Induction Genes 2.0x	12017	NM_152586	USP54	159195	2.9646	0.0001	11726413_a_at	22492899	NM_152586
24hr Induction Genes 2.0x	12017	NM_014707	HDAC9	9734	2.963	0.0001	11728076_at	22494562	NM_001204144
24hr Induction Genes 2.0x	12017	BF434088	PLD1	5337	2.9575	0.0103	11723546_s_at	22490032	NM_001130081
24hr Induction Genes 2.0x	12017	NM_003174	SVIL	6840	2.9448	0	11728498_a_at	22494984	NM_003174
24hr Induction Genes 2.0x	12017	BC070065	FOXO1	2308	2.9363	0.0012	11727929_a_at	22494415	NM_002015
24hr Induction Genes 2.0x	12017	AB040955	KIAA1522	57648	2.9358	0.0017	11755213_a_at	22521699	NM_001198972
24hr Induction Genes 2.0x	12017	W94949	PEG10	23089	2.9297	0.0017	11718358_at	22484844	NM_001040152
24hr Induction Genes 2.0x	12017	NM_002230	JUP	3728	2.9225	0	11716343_a_at	22482829	NM_002230
24hr Induction Genes 2.0x	12017	NM_003174	SVIL	6840	2.9225	0.0003	11728499_x_at	22494985	NM_003174
24hr Induction Genes 2.0x	12017	BC114570	NRCAM	4897	2.9221	0.0019	11746395_x_at	22512881	NM_001037132
24hr Induction Genes 2.0x	12017	AK289954	SEMA3A	10371	2.911	0.0001	11730390_at	22496876	NM_006080
24hr Induction Genes 2.0x	12017	AK302591	CEP85L	387119	2.8978	0.0113	11747163_a_at	22513649	NM_001042475
24hr Induction Genes 2.0x	12017	NM_003022	SH3BGRL	6451	2.8968	0.0004	11715624_at	22482110	NM_003022
24hr Induction Genes 2.0x	12017	AK027274	MARCKS	4082	2.8886	0	11742948_at	22509434	NM_002356
24hr Induction Genes 2.0x	12017	AU147415	FRMD4B	23150	2.8853	0.001	11731573_a_at	22498059	NM_015123
24hr Induction Genes 2.0x	12017	AK098525	HHIP	64399	2.8835	0.0013	11754706_a_at	22521192	NM_022475
24hr Induction Genes 2.0x	12017	NM_005410	SEPP1	6414	2.8823	0.0006	11731433_a_at	22497919	NM_001085486
24hr Induction Genes 2.0x	12017	NM_024761	MOB3B	79817	2.8813	0.0022	11725167_at	22491653	NM_024761
24hr Induction Genes 2.0x	12017	NM_145665	SPANXD /// SPANXE	171489	2.8801	0.0002	11731130_at	22497616	NM_032417
24hr Induction Genes 2.0x	12017	NM_006072	CCL26	10344	2.8794	0.0001	11721049_at	22487535	NM_006072
24hr Induction Genes 2.0x	12017	NM_001114086	CLIC5	53405	2.8775	0.0002	11722507_a_at	22488993	NM_001114086
24hr Induction Genes 2.0x	12017	AK302694	LOC645954 /// SVIL	645954	2.8737	0.0002	11750175_s_at	22516661	NM_003174
24hr Induction Genes 2.0x	12017	AF109367	SHROOM3	57619	2.865	0.0032	11721712_at	22488198	NM_020859
24hr Induction Genes 2.0x	12017	NM_000575	IL1A	3552	2.8612	0.0002	11725198_at	22491684	NM_000575
24hr Induction Genes 2.0x	12017	NM_001037582	SCD5	79966	2.8592	0	11716433_s_at	22482919	NM_001037582
24hr Induction Genes 2.0x	12017	NM_003007	SEMG1	6406	2.859	0.0088	11716702_a_at	22483188	NM_003007
24hr Induction Genes 2.0x	12017	AK296900	KLF5	688	2.8476	0.0002	11748762_x_at	22515248	NM_001730
24hr Induction Genes 2.0x	12017	NM_001003679	LEPR	3953	2.8472	0.0012	11726871_s_at	22493357	NM_001003679
24hr Induction Genes 2.0x	12017	AY358326	LNX1	84708	2.8414	0.0093	11730251_x_at	22496737	NM_001126328
24hr Induction Genes 2.0x	12017	NM_001002264	EPSTI1	94240	2.8392	0	11731181_a_at	22497667	NM_001002264
24hr Induction Genes 2.0x	12017	NM_017737	FNBP1L	54874	2.8373	0	11737831_a_at	22504317	NM_001024948
24hr Induction Genes 2.0x	12017	NM_198315	VWA5A	4013	2.8362	0.0008	11723563_at	22490049	NM_001130142
24hr Induction Genes 2.0x	12017	NM_138410	CMTM7	112616	2.8083	0.0001	11721702_a_at	22488188	NM_138410
24hr Induction Genes 2.0x	12017	BC098343	PDP1	54704	2.8059	0.0045	11722230_a_at	22488716	NM_001161778
24hr Induction Genes 2.0x	12017	AK096232	SESTD1	91404	2.8036	0.0001	11731539_at	22498025	NM_178123
24hr Induction Genes 2.0x	12017	NM_018433	KDM3A	55818	2.7962	0	11716574_at	22483060	NM_001146688
24hr Induction Genes 2.0x	12017	BQ025327	CNOT6L	246175	2.7955	0.0111	11723184_x_at	22489670	NM_144571
24hr Induction Genes 2.0x	12017	NM_153267	MAMDC2	256691	2.7954	0.001	11734418_s_at	22500904	NM_153267
24hr Induction Genes 2.0x	12017	CA772125	SIPA1L2	57568	2.7934	0.0001	11744185_a_at	22510671	NM_020808
24hr Induction Genes 2.0x	12017	NM_001024948	FNBP1L	54874	2.7891	0	11717552_s_at	22484038	NM_001024948
24hr Induction Genes 2.0x	12017	NM_001430	EPAS1 /// LOC100652809	100652809	2.788	0.0008	11715411_a_at	22481897	NM_001430
24hr Induction Genes 2.0x	12017	NM_001130142	VWA5A	4013	2.7849	0.003	11725692_a_at	22492178	NM_001130142
24hr Induction Genes 2.0x	12017	BC039715	ANKRD10	55608	2.7751	0.0003	11761390_a_at	22527876	NM_017664
24hr Induction Genes 2.0x	12017	NM_004585	RARRES3	5920	2.7633	0.0076	11719692_a_at	22486178	NM_004585
24hr Induction Genes 2.0x	12017	M60334	HLA-DRA	3122	2.7532	0.0003	11742850_x_at	22509336	NM_019111
24hr Induction Genes 2.0x	12017	CD366976	SVIL	6840	2.753	0.001	11739746_s_at	22506232	NM_003174
24hr Induction Genes 2.0x	12017	AY371042			2.7518	0.01	11759595_x_at	22526081	AY371042.1
24hr Induction Genes 2.0x	12017	BC143445	KIF6	221458	2.7498	0.0002	11745678_a_at	22512164	NM_145027
24hr Induction Genes 2.0x	12017	XR_015662	SVIL	6840	2.7362	0.0002	11757106_s_at	22523592	NM_003174
24hr Induction Genes 2.0x	12017	AK301134	HLA-DRA	3122	2.7315	0	11744484_s_at	22510970	NM_019111
24hr Induction Genes 2.0x	12017	NM_017563	IL17RD	54756	2.7295	0.0012	11723173_at	22489659	NM_017563
24hr Induction Genes 2.0x	12017	M90360	AKAP13	11214	2.7158	0.0037	11722595_a_at	22489081	NM_006738
24hr Induction Genes 2.0x	12017	BM983699	MTUS1	57509	2.7142	0.0018	11716915_a_at	22483401	NM_001001924
24hr Induction Genes 2.0x	12017	BQ025327	CNOT6L	246175	2.7118	0.009	11723183_s_at	22489669	NM_144571
24hr Induction Genes 2.0x	12017	NM_021255	PELI2	57161	2.7062	0.0008	11724068_at	22490554	NM_021255
24hr Induction Genes 2.0x	12017	NM_002937	RNASE4	6038	2.7054	0.0001	11718988_s_at	22485474	NM_002937
24hr Induction Genes 2.0x	12017	BX434453	PGF	5228	2.7032	0.0013	11757940_at	22524426	NM_001207012
24hr Induction Genes 2.0x	12017	BF063817	DSC2	1824	2.7008	0.0003	11757702_s_at	22524188	NM_004949
24hr Induction Genes 2.0x	12017	AK308688	IFIT1	3434	2.7008	0.0007	11756820_a_at	22523306	NM_001548
24hr Induction Genes 2.0x	12017	AK001160	MANSC1	54682	2.7007	0	11754973_x_at	22521459	NM_018050
24hr Induction Genes 2.0x	12017	NM_006080	SEMA3A	10371	2.6992	0.0001	11730391_at	22496877	NM_006080
24hr Induction Genes 2.0x	12017	AK126026	SLC2A14 /// SLC2A3	144195	2.6958	0.0023	11736555_s_at	22503041	NM_006931
24hr Induction Genes 2.0x	12017	NM_005302	GPR37	2861	2.6949	0.0001	11737992_s_at	22504478	NM_005302
24hr Induction Genes 2.0x	12017	NM_004335	BST2	684	2.693	0	11716034_a_at	22482520	NM_004335
24hr Induction Genes 2.0x	12017	AY358896	F11R	50848	2.6916	0	11720464_x_at	22486950	NM_016946
24hr Induction Genes 2.0x	12017	BT006880	CXCL1	2919	2.6903	0.0001	11754114_a_at	22520600	NM_001511
24hr Induction Genes 2.0x	12017	AK311312	RND3	390	2.689	0.0122	11756465_s_at	22522951	NM_001254738
24hr Induction Genes 2.0x	12017	BC065536	DST /// LOC100652766	100652766	2.6884	0.0162	11745119_a_at	22511605	NM_001144769
24hr Induction Genes 2.0x	12017	AK291698	VWA5A	4013	2.6865	0.001	11739258_a_at	22505744	NM_001130142
24hr Induction Genes 2.0x	12017	BU630777	NDFIP2	54602	2.6821	0	11727797_at	22494283	NM_001161407
24hr Induction Genes 2.0x	12017	AF051851	SVIL	6840	2.6771	0.0007	11728497_s_at	22494983	NM_003174
24hr Induction Genes 2.0x	12017	AK095628	MLL3 /// TPTE	58508	2.6748	0.025	11739409_s_at	22505895	NM_021230
24hr Induction Genes 2.0x	12017	NM_001005404	YPEL2	388403	2.6683	0.0048	11721957_at	22488443	NM_001005404
24hr Induction Genes 2.0x	12017	NM_152754	SEMA3D	223117	2.6653	0.0008	11731195_at	22497681	NM_152754
24hr Induction Genes 2.0x	12017	NM_001008540	CXCR4	7852	2.6624	0.0198	11728189_a_at	22494675	NM_001008540
24hr Induction Genes 2.0x	12017	NM_020182	PMEPA1	56937	2.6569	0.0002	11716149_a_at	22482635	NM_001255976
24hr Induction Genes 2.0x	12017	BC053667	LGALS3	3958	2.6547	0	11725937_a_at	22492423	NM_001177388
24hr Induction Genes 2.0x	12017	CD365380	ETS2	2114	2.6524	0	11758370_s_at	22524856	NM_001256295
24hr Induction Genes 2.0x	12017	BM563260	LOC100652751 /// LOC100653313 /// SCD	100652751	2.651	0.0017	11715562_x_at	22482048	NM_005063
24hr Induction Genes 2.0x	12017	NM_001387	DPYSL3	1809	2.6509	0.0059	11715751_a_at	22482237	NM_001197294
24hr Induction Genes 2.0x	12017	AK301220	IL7R	3575	2.6485	0.0006	11762266_x_at	22528752	NM_002185
24hr Induction Genes 2.0x	12017	BI041372	DAAM1	23002	2.6476	0	11755080_a_at	22521566	NM_014992
24hr Induction Genes 2.0x	12017	NM_018371	CSGALNACT1	55790	2.646	0.0003	11732526_s_at	22499012	NM_001130518
24hr Induction Genes 2.0x	12017	AA702942	THRB	7068	2.6436	0.0005	11758048_s_at	22524534	NM_000461
24hr Induction Genes 2.0x	12017	NM_001144002	CTPS2	56474	2.6414	0.0004	11732361_a_at	22498847	NM_001144002
24hr Induction Genes 2.0x	12017	AK302651	PDP1	54704	2.6302	0.0095	11747314_a_at	22513800	NM_001161778
24hr Induction Genes 2.0x	12017	CK001625	MXI1	4601	2.622	0.0027	11730843_a_at	22497329	NM_001008541
24hr Induction Genes 2.0x	12017	AB096954	KRTAP6-1	337966	2.6213	0.0026	11759391_at	22525877	NM_181602
24hr Induction Genes 2.0x	12017	AB032988	TMX4	56255	2.6203	0	11759288_at	22525774	NM_021156
24hr Induction Genes 2.0x	12017	NM_004335	BST2	684	2.6203	0.0004	11716036_x_at	22482522	NM_004335
24hr Induction Genes 2.0x	12017	BC012570	PALMD	54873	2.6202	0.0102	11718871_x_at	22485357	NM_017734
24hr Induction Genes 2.0x	12017	AF077298	PRSS12	8492	2.6192	0.0041	11739890_at	22506376	NM_003619
24hr Induction Genes 2.0x	12017	BC004205	SPRY2	10253	2.6132	0	11753988_a_at	22520474	NM_005842
24hr Induction Genes 2.0x	12017	BC146818	CTAGE15P /// CTAGE4 /// CTAGE6P /// CTAGE8 /// CTAGE9	100128553	2.6096	0.0005	11737126_x_at	22503612	NM_001008747
24hr Induction Genes 2.0x	12017	AU253593	CNOT6L	246175	2.6066	0.0028	11757917_s_at	22524403	NM_144571
24hr Induction Genes 2.0x	12017	NM_001130058	SLC44A5	204962	2.6063	0.0001	11733492_s_at	22499978	NM_001130058
24hr Induction Genes 2.0x	12017	AK290427	IFIT3	3437	2.6017	0.0004	11731407_x_at	22497893	NM_001031683
24hr Induction Genes 2.0x	12017	g31791013	KRTAP20-2	337976	2.5992	0.0052	11715145_s_at	22481631	NM_181616
24hr Induction Genes 2.0x	12017	CR624632	IL6	3569	2.5978	0.001	11746463_a_at	22512949	NM_000600
24hr Induction Genes 2.0x	12017	AK303900	CAST	831	2.5915	0.0007	11750050_a_at	22516536	NM_001042440
24hr Induction Genes 2.0x	12017	NM_053064	GNG2	54331	2.5896	0.0002	11721248_s_at	22487734	NM_001243773
24hr Induction Genes 2.0x	12017	NM_002114	HIVEP1	3096	2.5816	0.0001	11722548_at	22489034	NM_002114
24hr Induction Genes 2.0x	12017	CD172116	CAMK2D	817	2.5788	0	11725327_a_at	22491813	NM_001221
24hr Induction Genes 2.0x	12017	BC017020	SSBP2	23635	2.5725	0.0001	11718780_a_at	22485266	NM_001256732
24hr Induction Genes 2.0x	12017	BU686994	NUAK1	9891	2.5701	0.0039	11739972_at	22506458	NM_014840
24hr Induction Genes 2.0x	12017	AF244577	SLC17A5	26503	2.5699	0.0053	11752119_x_at	22518605	NM_012434
24hr Induction Genes 2.0x	12017	BQ025327	CNOT6L	246175	2.5694	0.0007	11723182_at	22489668	NM_144571
24hr Induction Genes 2.0x	12017	AY046419	SLC2A12	154091	2.5599	0.0004	11730240_a_at	22496726	NM_145176
24hr Induction Genes 2.0x	12017	NM_020665	TMEM27	57393	2.554	0.0001	11722244_at	22488730	NM_020665
24hr Induction Genes 2.0x	12017	NM_032587	CARD6	84674	2.549	0.0003	11728617_at	22495103	NM_032587
24hr Induction Genes 2.0x	12017	U87460	GPR37	2861	2.5435	0.0041	11751962_s_at	22518448	NM_005302
24hr Induction Genes 2.0x	12017	NM_001005619	ITGB4	3691	2.5315	0.0041	11724978_a_at	22491464	NM_000213
24hr Induction Genes 2.0x	12017	U90065	KCNK1	3775	2.5212	0.0009	11728842_a_at	22495328	NM_002245
24hr Induction Genes 2.0x	12017	NM_019053	EXOC6	54536	2.5166	0	11723221_a_at	22489707	NM_001013848
24hr Induction Genes 2.0x	12017	AK095492	HMGCS1	3157	2.5117	0.0003	11754918_s_at	22521404	NM_001098272
24hr Induction Genes 2.0x	12017	AK304404	TGFBR2	7048	2.5104	0.0023	11750840_s_at	22517326	NM_001024847
24hr Induction Genes 2.0x	12017	NM_005242	F2RL1	2150	2.508	0.0009	11728828_at	22495314	NM_005242
24hr Induction Genes 2.0x	12017	NM_000716	C4BPB	725	2.5058	0.0002	11729899_a_at	22496385	NM_000716
24hr Induction Genes 2.0x	12017	AW471117	RLF	6018	2.4985	0.01	11742864_at	22509350	NM_012421
24hr Induction Genes 2.0x	12017	BC059360	PGM2L1	283209	2.4946	0.0007	11724776_at	22491262	NM_173582
24hr Induction Genes 2.0x	12017	NM_001198	PRDM1	639	2.4923	0.0111	11726218_a_at	22492704	NM_001198
24hr Induction Genes 2.0x	12017	AV764112	NFKBIZ	64332	2.4922	0	11757513_at	22523999	NM_001005474
24hr Induction Genes 2.0x	12017	R99585	INPP5F	22876	2.4899	0.0001	11758025_x_at	22524511	NM_001243194
24hr Induction Genes 2.0x	12017	CR592313	C19orf66	55337	2.4886	0	11744178_a_at	22510664	NM_018381
24hr Induction Genes 2.0x	12017	NM_002114	HIVEP1	3096	2.4825	0.0036	11722547_a_at	22489033	NM_002114
24hr Induction Genes 2.0x	12017	NM_018950	HLA-F	3134	2.4823	0.0001	11718230_a_at	22484716	NM_001098478
24hr Induction Genes 2.0x	12017	NM_000213	ITGB4	3691	2.4795	0.0013	11726795_a_at	22493281	NM_000213
24hr Induction Genes 2.0x	12017	NM_001040665	STEAP2	261729	2.4788	0.0019	11742423_a_at	22508909	NM_001040665
24hr Induction Genes 2.0x	12017	NM_145665	SPANXD /// SPANXE	171489	2.4778	0	11759051_x_at	22525537	NM_032417
24hr Induction Genes 2.0x	12017	NM_001130845	BCL6	604	2.4765	0.0068	11720745_a_at	22487231	NM_001130845
24hr Induction Genes 2.0x	12017	NM_130444	COL18A1	80781	2.4752	0.0002	11716281_a_at	22482767	NM_030582
24hr Induction Genes 2.0x	12017	AK292167	PTGS2	5743	2.4746	0.0055	11724036_a_at	22490522	NM_000963
24hr Induction Genes 2.0x	12017	NM_015993	PLLP	51090	2.4725	0.0026	11722052_at	22488538	NM_015993
24hr Induction Genes 2.0x	12017	AI635277	VGLL3	389136	2.4715	0.0089	11757631_s_at	22524117	NM_016206
24hr Induction Genes 2.0x	12017	AK300038	TCF4	6925	2.4695	0.0012	11745765_x_at	22512251	NM_001083962
24hr Induction Genes 2.0x	12017	NM_001001924	MTUS1	57509	2.4663	0.0015	11716913_a_at	22483399	NM_001001924
24hr Induction Genes 2.0x	12017	BC049836	SDC2	6383	2.4643	0.0003	11745007_s_at	22511493	NM_002998
24hr Induction Genes 2.0x	12017	NM_001130518	CSGALNACT1	55790	2.4625	0.0001	11727223_a_at	22493709	NM_001130518
24hr Induction Genes 2.0x	12017	BC144510	TMEM2	23670	2.4622	0.0001	11755762_a_at	22522248	NM_001135820
24hr Induction Genes 2.0x	12017	AI912275	BCL11A	53335	2.4617	0.0032	11732339_at	22498825	NM_018014
24hr Induction Genes 2.0x	12017	CX758352	TMEM135	65084	2.4611	0.0005	11745789_a_at	22512275	NM_001168724
24hr Induction Genes 2.0x	12017	BC007038	LUM	4060	2.46	0.009	11715796_s_at	22482282	NM_002345
24hr Induction Genes 2.0x	12017	AI033894	SLC17A5	26503	2.4593	0.0005	11758156_s_at	22524642	NM_012434
24hr Induction Genes 2.0x	12017	NM_006120	HLA-DMA	3108	2.4577	0.0071	11716554_a_at	22483040	NM_006120
24hr Induction Genes 2.0x	12017	NM_002943	RORA	6095	2.457	0.0016	11725676_a_at	22492162	NM_002943
24hr Induction Genes 2.0x	12017	EF054877	RGS4	5999	2.4557	0.011	11741572_a_at	22508058	NM_001102445
24hr Induction Genes 2.0x	12017	AK123579	BMPR2	659	2.4545	0.0001	11756105_a_at	22522591	NM_001204
24hr Induction Genes 2.0x	12017	AK055922	CDK6	1021	2.4524	0.0151	11723241_at	22489727	NM_001145306
24hr Induction Genes 2.0x	12017	NM_032047	B3GNT5 /// LOC100505668	100505668	2.446	0.0002	11722705_at	22489191	NM_032047
24hr Induction Genes 2.0x	12017	NM_020927	VAT1L	57687	2.4443	0.0009	11723332_at	22489818	NM_020927
24hr Induction Genes 2.0x	12017	BC017020	SSBP2	23635	2.44	0.0005	11718781_s_at	22485267	NM_001256732
24hr Induction Genes 2.0x	12017	BQ128199	CPE	1363	2.44	0.0021	11743577_s_at	22510063	NM_001873
24hr Induction Genes 2.0x	12017	NM_181873	MTMR11	10903	2.4373	0.0006	11737388_s_at	22503874	NM_001145862
24hr Induction Genes 2.0x	12017	NM_004398	DDX10	1662	2.4342	0.0004	11723101_a_at	22489587	NM_004398
24hr Induction Genes 2.0x	12017	NM_012434	SLC17A5	26503	2.4177	0.008	11723477_x_at	22489963	NM_012434
24hr Induction Genes 2.0x	12017	AK300273	CTHRC1	115908	2.4148	0.0002	11748905_a_at	22515391	NM_001256099
24hr Induction Genes 2.0x	12017	NM_001007139	IGF2 /// INS-IGF2	3481	2.4098	0.0001	11739787_a_at	22506273	NM_000612
24hr Induction Genes 2.0x	12017	NM_004726	REPS2	9185	2.4051	0.0065	11722348_a_at	22488834	NM_001080975
24hr Induction Genes 2.0x	12017	AK291745	SSFA2	6744	2.4042	0.0002	11718023_x_at	22484509	NM_001130445
24hr Induction Genes 2.0x	12017	BC136295	TGFBR3	7049	2.3992	0.0001	11718900_a_at	22485386	NM_001195683
24hr Induction Genes 2.0x	12017	NM_001001396	ATP2B4	493	2.3971	0	11718081_a_at	22484567	NM_001001396
24hr Induction Genes 2.0x	12017	AK126854	KDM4B	23030	2.3944	0.0022	11755420_a_at	22521906	NM_015015
24hr Induction Genes 2.0x	12017	CB052020	ARID5B	84159	2.3882	0.0001	11718926_a_at	22485412	NM_001244638
24hr Induction Genes 2.0x	12017	AI264196	FBN1	2200	2.3867	0.0031	11720509_a_at	22486995	NM_000138
24hr Induction Genes 2.0x	12017	NM_015473	HEATR5A	25938	2.3858	0.0075	11725229_s_at	22491715	NM_015473
24hr Induction Genes 2.0x	12017	AK315888	SAT1	6303	2.3857	0.0058	11760200_a_at	22526686	NM_002970
24hr Induction Genes 2.0x	12017	CU443124	EGLN3	112399	2.3817	0.0029	11757444_a_at	22523930	NM_022073
24hr Induction Genes 2.0x	12017	NM_005329	HAS3	3038	2.379	0.0036	11725584_at	22492070	NM_001199280
24hr Induction Genes 2.0x	12017	CR541907	NNMT	4837	2.3789	0	11744776_a_at	22511262	NM_006169
24hr Induction Genes 2.0x	12017	NM_000958	PTGER4	5734	2.3785	0.0001	11725793_s_at	22492279	NM_000958
24hr Induction Genes 2.0x	12017	NM_017707	ASAP3	55616	2.3678	0.0094	11721759_a_at	22488245	NM_001143778
24hr Induction Genes 2.0x	12017	NM_014181	LGALSL	29094	2.3668	0.0031	11720541_at	22487027	NM_014181
24hr Induction Genes 2.0x	12017	AK055674	MAP2	4133	2.3591	0.0026	11733832_a_at	22500318	NM_001039538
24hr Induction Genes 2.0x	12017	BE300521	INSIG1	3638	2.359	0.0001	11716338_a_at	22482824	NM_005542
24hr Induction Genes 2.0x	12017	CF125206	LOC100652886 /// LOC100653157 /// TGFBI	100652886	2.358	0	11755281_a_at	22521767	NM_000358
24hr Induction Genes 2.0x	12017	N90777	NRP2	8828	2.3554	0.0074	11716970_a_at	22483456	NM_003872
24hr Induction Genes 2.0x	12017	BX640607	STAT2	6773	2.3516	0.0063	11755147_s_at	22521633	NM_005419
24hr Induction Genes 2.0x	12017	AK303900	CAST	831	2.3503	0.0003	11750051_x_at	22516537	NM_001042440
24hr Induction Genes 2.0x	12017	BC113603	PIK3CA	5290	2.3479	0.0002	11745214_a_at	22511700	NM_006218
24hr Induction Genes 2.0x	12017	BF028433	PMEPA1	56937	2.3473	0.0001	11716150_a_at	22482636	NM_001255976
24hr Induction Genes 2.0x	12017	DB308423	CEP85L	387119	2.3429	0.0002	11759323_at	22525809	NM_001042475
24hr Induction Genes 2.0x	12017	NM_020859	SHROOM3	57619	2.3413	0.0038	11721711_at	22488197	NM_020859
24hr Induction Genes 2.0x	12017	BC074807	MMP13	4322	2.3406	0.0009	11729297_at	22495783	NM_002427
24hr Induction Genes 2.0x	12017	NM_001321	CSRP2	1466	2.3382	0.0022	11729238_a_at	22495724	NM_001321
24hr Induction Genes 2.0x	12017	NM_001034850	FAM134B	54463	2.3378	0	11719736_s_at	22486222	NM_001034850
24hr Induction Genes 2.0x	12017	AK290378	SDPR	8436	2.3371	0.0002	11725694_at	22492180	NM_004657
24hr Induction Genes 2.0x	12017	BM969177	ST8SIA4	7903	2.3355	0.0011	11739522_at	22506008	NM_005668
24hr Induction Genes 2.0x	12017	NM_024607	PPP1R3B	79660	2.3331	0.0088	11721034_at	22487520	NM_001201329
24hr Induction Genes 2.0x	12017	NM_001017995	SH3PXD2B	285590	2.3311	0.0059	11723123_at	22489609	NM_001017995
24hr Induction Genes 2.0x	12017	NM_001343	DAB2	1601	2.3291	0.0007	11722355_s_at	22488841	NM_001244871
24hr Induction Genes 2.0x	12017	CR625782	ISG20	3669	2.3279	0.0026	11756806_a_at	22523292	NM_002201
24hr Induction Genes 2.0x	12017	NM_178868	CMTM8	152189	2.3271	0.0021	11726437_a_at	22492923	NM_178868
24hr Induction Genes 2.0x	12017	AK290052	ARAP3	64411	2.3248	0.0084	11728742_a_at	22495228	NM_022481
24hr Induction Genes 2.0x	12017	AF395488	CTHRC1	115908	2.3235	0.0001	11744718_a_at	22511204	NM_001256099
24hr Induction Genes 2.0x	12017	NM_004877	GMFG	9535	2.3227	0.0002	11717760_a_at	22484246	NM_004877
24hr Induction Genes 2.0x	12017	BI670250	OPTN	10133	2.318	0.0052	11757341_s_at	22523827	NM_001008211
24hr Induction Genes 2.0x	12017	BC142661	INADL	10207	2.3153	0.0005	11745624_s_at	22512110	NM_005799
24hr Induction Genes 2.0x	12017	CA944479	ST8SIA4	7903	2.314	0.0018	11739521_at	22506007	NM_005668
24hr Induction Genes 2.0x	12017	NM_004396	DDX5	1655	2.3093	0.003	11733798_at	22500284	NM_004396
24hr Induction Genes 2.0x	12017	BM996339	TCF4	6925	2.3056	0.0027	11724239_at	22490725	NM_001083962
24hr Induction Genes 2.0x	12017	NM_003242	TGFBR2	7048	2.3017	0.0002	11724682_s_at	22491168	NM_001024847
24hr Induction Genes 2.0x	12017	AI800709	ANK3	288	2.3014	0.0003	11721205_a_at	22487691	NM_001149
24hr Induction Genes 2.0x	12017	M61199	SSFA2	6744	2.2958	0	11745865_a_at	22512351	NM_001130445
24hr Induction Genes 2.0x	12017	BC041464	LOC154761	154761	2.295	0.0035	11755327_s_at	22521813	NR_015421
24hr Induction Genes 2.0x	12017	AL117587	ZNF608	57507	2.2919	0.0016	11755450_a_at	22521936	NM_020747
24hr Induction Genes 2.0x	12017	BM971589	MTUS1	57509	2.2913	0.0029	11724476_a_at	22490962	NM_001001924
24hr Induction Genes 2.0x	12017	BC126434	LBH	81606	2.2893	0.0048	11716161_s_at	22482647	NM_030915
24hr Induction Genes 2.0x	12017	NM_001321	CSRP2	1466	2.2884	0.0051	11729239_x_at	22495725	NM_001321
24hr Induction Genes 2.0x	12017	AY358554	LAYN	143903	2.2872	0.0001	11726004_a_at	22492490	NM_001258390
24hr Induction Genes 2.0x	12017	NM_006800	MSL3	10943	2.287	0.0002	11722874_s_at	22489360	NM_001193270
24hr Induction Genes 2.0x	12017	U04898	RORA	6095	2.2852	0.0004	11726244_a_at	22492730	NM_002943
24hr Induction Genes 2.0x	12017	AY358326	LNX1	84708	2.2816	0.0001	11730250_a_at	22496736	NM_001126328
24hr Induction Genes 2.0x	12017	NM_005589	ALDH6A1	4329	2.2814	0.0016	11722998_a_at	22489484	NM_005589
24hr Induction Genes 2.0x	12017	NM_001042475	CEP85L	387119	2.2806	0.0313	11739888_at	22506374	NM_001042475
24hr Induction Genes 2.0x	12017	NM_001032731	OAS2	4939	2.2784	0.0005	11726778_at	22493264	NM_001032731
24hr Induction Genes 2.0x	12017	NM_058237	PPP4R4	57718	2.2778	0.0106	11740425_at	22506911	NM_020958
24hr Induction Genes 2.0x	12017	AF087862	RHOJ	57381	2.2719	0.002	11749864_a_at	22516350	NM_020663
24hr Induction Genes 2.0x	12017	NM_001008566	TPST2	8459	2.2716	0.002	11721498_a_at	22487984	NM_001008566
24hr Induction Genes 2.0x	12017	CD238308	PEG10	23089	2.2712	0.0001	11757759_s_at	22524245	NM_001040152
24hr Induction Genes 2.0x	12017	CA448065	PMEPA1	56937	2.2699	0	11716151_a_at	22482637	NM_001255976
24hr Induction Genes 2.0x	12017	AK298939	SDC2	6383	2.2695	0	11746797_a_at	22513283	NM_002998
24hr Induction Genes 2.0x	12017	BC109280	DNAJC6	9829	2.2693	0.0054	11745301_a_at	22511787	NM_001256864
24hr Induction Genes 2.0x	12017	NM_017650	PPP1R9A	55607	2.2681	0.0019	11724923_at	22491409	NM_001166160
24hr Induction Genes 2.0x	12017	NM_000358	LOC100652886 /// LOC100653157 /// TGFBI	100652886	2.2679	0.0002	11734548_a_at	22501034	NM_000358
24hr Induction Genes 2.0x	12017	M15036	PROS1	5627	2.2658	0.0012	11720134_s_at	22486620	NM_000313
24hr Induction Genes 2.0x	12017	BC104808	RBM24	221662	2.2657	0.0037	11738153_x_at	22504639	NM_001143941
24hr Induction Genes 2.0x	12017	AK292029	CCNG2	901	2.2638	0.0001	11726624_a_at	22493110	NM_004354
24hr Induction Genes 2.0x	12017	AA554111	MARCKS	4082	2.2607	0.0004	11757816_s_at	22524302	NM_002356
24hr Induction Genes 2.0x	12017	CD243383	TRIB2	28951	2.2602	0.0039	11716940_a_at	22483426	NM_021643
24hr Induction Genes 2.0x	12017	NM_000358	LOC100652886 /// LOC100653157 /// TGFBI	100652886	2.26	0.0001	11734549_s_at	22501035	NM_000358
24hr Induction Genes 2.0x	12017	AK074243	TMEM87B	84910	2.2548	0.0137	11739470_at	22505956	NM_032824
24hr Induction Genes 2.0x	12017	AA594975	PBX1	5087	2.2544	0.0002	11757871_s_at	22524357	NM_001204961
24hr Induction Genes 2.0x	12017	BC030517	FAM134B	54463	2.2543	0	11753179_s_at	22519665	NM_001034850
24hr Induction Genes 2.0x	12017	NM_000875	IGF1R	3480	2.2517	0.0014	11718705_at	22485191	NM_000875
24hr Induction Genes 2.0x	12017	NM_145307	RTKN2	219790	2.2482	0.0032	11728564_at	22495050	NM_145307
24hr Induction Genes 2.0x	12017	NM_000358	LOC100652886 /// LOC100653157 /// TGFBI	100652886	2.2477	0.0002	11734550_x_at	22501036	NM_000358
24hr Induction Genes 2.0x	12017	BC003064	DAB2	1601	2.2469	0.0002	11722356_a_at	22488842	NM_001244871
24hr Induction Genes 2.0x	12017	AK298380	LIPH	200879	2.2464	0.0011	11748223_a_at	22514709	NM_139248
24hr Induction Genes 2.0x	12017	AW340316	NAB1	4664	2.2446	0.0001	11764019_s_at	22530505	NM_005966
24hr Induction Genes 2.0x	12017	CA948182	ZBTB38	253461	2.2423	0.0001	11728735_a_at	22495221	NM_001080412
24hr Induction Genes 2.0x	12017	NM_005841	SPRY1	10252	2.241	0.0005	11717652_s_at	22484138	NM_001258038
24hr Induction Genes 2.0x	12017	NM_001017395	TMCC1	23023	2.2355	0.0047	11721585_a_at	22488071	NM_001017395
24hr Induction Genes 2.0x	12017	X70683	SOX4	6659	2.2355	0.006	11719559_at	22486045	NM_003107
24hr Induction Genes 2.0x	12017	U47414	CCNG2	901	2.233	0.0006	11726625_at	22493111	NM_004354
24hr Induction Genes 2.0x	12017	AK293317	LAYN	143903	2.2326	0	11748492_a_at	22514978	NM_001258390
24hr Induction Genes 2.0x	12017	NM_004335	BST2	684	2.2322	0.0004	11716035_at	22482521	NM_004335
24hr Induction Genes 2.0x	12017	AK299059	DCLK1	9201	2.2322	0.0242	11745757_a_at	22512243	NM_001195415
24hr Induction Genes 2.0x	12017	NM_004657	SDPR	8436	2.2321	0	11725695_s_at	22492181	NM_004657
24hr Induction Genes 2.0x	12017	BC039196	SLC2A14 /// SLC2A3	144195	2.2298	0.0005	11734657_s_at	22501143	NM_006931
24hr Induction Genes 2.0x	12017	AK297579	TP53I3	9540	2.2292	0.0024	11749789_a_at	22516275	NM_001206802
24hr Induction Genes 2.0x	12017	NM_001127662	GSN	2934	2.2261	0	11723329_a_at	22489815	NM_000177
24hr Induction Genes 2.0x	12017	BC047391	RALGPS2	55103	2.2226	0.0205	11746032_a_at	22512518	NM_018037
24hr Induction Genes 2.0x	12017	NM_203349	SHC4	399694	2.2216	0.0094	11726849_at	22493335	NM_203349
24hr Induction Genes 2.0x	12017	NM_021150	GRIP1	23426	2.2215	0.0012	11728110_at	22494596	NM_001178074
24hr Induction Genes 2.0x	12017	AK000990	UACA	55075	2.2179	0.0003	11733252_a_at	22499738	NM_001008224
24hr Induction Genes 2.0x	12017	CR591353	LOX	4015	2.2156	0.0395	11758995_at	22525481	NM_001178102
24hr Induction Genes 2.0x	12017	BX537388	PIK3R3	8503	2.2152	0.0002	11754316_a_at	22520802	NM_001114172
24hr Induction Genes 2.0x	12017	AY303779	PNRC1	10957	2.2123	0.0022	11753514_s_at	22520000	NM_006813
24hr Induction Genes 2.0x	12017	CR590690	FAM84B	157638	2.2119	0	11739255_x_at	22505741	NM_174911
24hr Induction Genes 2.0x	12017	NM_020987	ANK3	288	2.2118	0.0004	11721204_a_at	22487690	NM_001149
24hr Induction Genes 2.0x	12017	BQ000301	NAB1	4664	2.2111	0.0051	11739475_s_at	22505961	NM_005966
24hr Induction Genes 2.0x	12017	AK095628	MLL3	58508	2.2104	0.0071	11739410_x_at	22505896	NM_021230
24hr Induction Genes 2.0x	12017	NM_001130845	BCL6	604	2.2091	0.0001	11720746_s_at	22487232	NM_001130845
24hr Induction Genes 2.0x	12017	AK090570	ARHGEF5	7984	2.2091	0.0024	11755837_a_at	22522323	NM_001002861
24hr Induction Genes 2.0x	12017	NM_001145099	SLC2A6	11182	2.2061	0.0044	11740957_x_at	22507443	NM_001145099
24hr Induction Genes 2.0x	12017	AK297190	CCNG1	900	2.2055	0.0003	11749306_a_at	22515792	NM_004060
24hr Induction Genes 2.0x	12017	U34038	F2RL1	2150	2.2049	0	11728827_at	22495313	NM_005242
24hr Induction Genes 2.0x	12017	BG568641	CP	1356	2.2033	0.0052	11726981_a_at	22493467	NM_000096
24hr Induction Genes 2.0x	12017	NM_199327	SPRY1	10252	2.2032	0.0002	11738073_s_at	22504559	NM_001258038
24hr Induction Genes 2.0x	12017	AK021827	SLC16A9	220963	2.2032	0.0016	11734939_a_at	22501425	NM_194298
24hr Induction Genes 2.0x	12017	CA941893	TACC1	6867	2.201	0.0005	11744357_a_at	22510843	NM_001122824
24hr Induction Genes 2.0x	12017	NM_004411	DYNC1I1	1780	2.1992	0.0062	11724908_a_at	22491394	NM_001135556
24hr Induction Genes 2.0x	12017	BC049836	SDC2	6383	2.1975	0	11745006_a_at	22511492	NM_002998
24hr Induction Genes 2.0x	12017	NM_017554	PARP14	54625	2.1951	0.0062	11721997_s_at	22488483	NM_017554
24hr Induction Genes 2.0x	12017	BC136320	MTUS1	57509	2.1901	0.0053	11716914_a_at	22483400	NM_001001924
24hr Induction Genes 2.0x	12017	NM_003739	AKR1C3	8644	2.1878	0.0002	11715711_a_at	22482197	NM_001253908
24hr Induction Genes 2.0x	12017	BC063611	PELI1	57162	2.1877	0.0036	11733060_a_at	22499546	NM_020651
24hr Induction Genes 2.0x	12017	NM_001130445	SSFA2	6744	2.1864	0.0005	11718022_x_at	22484508	NM_001130445
24hr Induction Genes 2.0x	12017	NM_001135820	TMEM2	23670	2.1837	0.004	11741536_x_at	22508022	NM_001135820
24hr Induction Genes 2.0x	12017	BM682674	MAB21L1	4081	2.1825	0.0004	11743770_at	22510256	NM_005584
24hr Induction Genes 2.0x	12017	AK074554	ITSN1	6453	2.1809	0.0001	11736141_a_at	22502627	NM_001001132
24hr Induction Genes 2.0x	12017	AI719994	RGL1	23179	2.18	0.0037	11757824_s_at	22524310	NM_015149
24hr Induction Genes 2.0x	12017	AA873869	TSHZ2	128553	2.1794	0.0022	11758468_s_at	22524954	NM_001193421
24hr Induction Genes 2.0x	12017	NM_001135820	TMEM2	23670	2.1787	0.001	11741535_a_at	22508021	NM_001135820
24hr Induction Genes 2.0x	12017	NM_001130445	SSFA2	6744	2.178	0	11718021_s_at	22484507	NM_001130445
24hr Induction Genes 2.0x	12017	AI472316	LIFR	3977	2.1746	0.0004	11758145_s_at	22524631	NM_001127671
24hr Induction Genes 2.0x	12017	NM_001077427	LYPD1	116372	2.1693	0	11741122_a_at	22507608	NM_001077427
24hr Induction Genes 2.0x	12017	NM_006084	IRF9	10379	2.1687	0.0161	11720208_a_at	22486694	NM_006084
24hr Induction Genes 2.0x	12017	AI962897	SEMA3C	10512	2.166	0.0145	11723667_at	22490153	NM_006379
24hr Induction Genes 2.0x	12017	NM_006290	TNFAIP3	7128	2.1659	0.0012	11718939_s_at	22485425	NM_006290
24hr Induction Genes 2.0x	12017	AK295742	SORBS2	8470	2.1647	0.0077	11761382_x_at	22527868	NM_001145670
24hr Induction Genes 2.0x	12017	W72044	INSIG1	3638	2.1641	0.0001	11716339_a_at	22482825	NM_005542
24hr Induction Genes 2.0x	12017	NM_173511	FAM117B	150864	2.1634	0.0212	11726459_at	22492945	NM_173511
24hr Induction Genes 2.0x	12017	BQ775757	ODZ2	57451	2.1607	0.0006	11739857_at	22506343	NM_001080428
24hr Induction Genes 2.0x	12017	AK304725	TACC1	6867	2.1607	0.0104	11752792_a_at	22519278	NM_001122824
24hr Induction Genes 2.0x	12017	AK294611	LNX1	84708	2.1592	0.0003	11750800_a_at	22517286	NM_001126328
24hr Induction Genes 2.0x	12017	AK316350	FN1	2335	2.1579	0.0002	11739534_a_at	22506020	NM_002026
24hr Induction Genes 2.0x	12017	CB052914	PDE7B	27115	2.1543	0.0014	11757985_s_at	22524471	NM_018945
24hr Induction Genes 2.0x	12017	AK297190	CCNG1	900	2.1509	0.001	11749307_x_at	22515793	NM_004060
24hr Induction Genes 2.0x	12017	AK294839	NDFIP2	54602	2.15	0.0004	11751348_a_at	22517834	NM_001161407
24hr Induction Genes 2.0x	12017	BC021803	FRYL	285527	2.1495	0.0023	11746570_s_at	22513056	NM_001039751
24hr Induction Genes 2.0x	12017	NM_004355	CD74	972	2.1494	0	11726255_x_at	22492741	NM_001025158
24hr Induction Genes 2.0x	12017	NM_018950	HLA-F	3134	2.1492	0.0003	11718231_x_at	22484717	NM_001098478
24hr Induction Genes 2.0x	12017	NM_002260	KLRC1 /// KLRC2	3821	2.1487	0.0049	11731848_s_at	22498334	NM_002259
24hr Induction Genes 2.0x	12017	BM563260	SCD	6319	2.1483	0.0074	11715561_s_at	22482047	NM_005063
24hr Induction Genes 2.0x	12017	NM_025074	FRAS1	80144	2.1475	0.0004	11723177_at	22489663	NM_001166133
24hr Induction Genes 2.0x	12017	NM_021101	CLDN1	9076	2.147	0.0008	11728232_a_at	22494718	NM_021101
24hr Induction Genes 2.0x	12017	CR592899	CTHRC1	115908	2.1458	0	11743856_a_at	22510342	NM_001256099
24hr Induction Genes 2.0x	12017	AK023426	BMPR2	659	2.1433	0.0071	11728699_at	22495185	NM_001204
24hr Induction Genes 2.0x	12017	AL563781	NDRG1	10397	2.143	0.0006	11754337_s_at	22520823	NM_001135242
24hr Induction Genes 2.0x	12017	BC146780	TMEM2	23670	2.1425	0.0006	11720367_a_at	22486853	NM_001135820
24hr Induction Genes 2.0x	12017	AK300067	SDC2	6383	2.1404	0.0024	11751122_x_at	22517608	NM_002998
24hr Induction Genes 2.0x	12017	NM_006520	DYNLT3	6990	2.1387	0	11719373_at	22485859	NM_006520
24hr Induction Genes 2.0x	12017	AK301450	GRK5	2869	2.1382	0.0005	11747250_a_at	22513736	NM_005308
24hr Induction Genes 2.0x	12017	AK295432	MSMO1	6307	2.1366	0.0009	11740092_x_at	22506578	NM_001017369
24hr Induction Genes 2.0x	12017	BC144612	TMEM189 /// TMEM189-UBE2V1	387521	2.1361	0.0001	11755308_x_at	22521794	NM_001162505
24hr Induction Genes 2.0x	12017	NM_182915	STEAP3	55240	2.1349	0.0037	11722678_a_at	22489164	NM_001008410
24hr Induction Genes 2.0x	12017	BC110385	RASSF2	9770	2.1344	0.0001	11746640_a_at	22513126	NM_014737
24hr Induction Genes 2.0x	12017	AK302533	CBLB	868	2.1332	0.003	11753986_a_at	22520472	NM_170662
24hr Induction Genes 2.0x	12017	NM_003243	TGFBR3	7049	2.1329	0.0011	11718901_at	22485387	NM_001195683
24hr Induction Genes 2.0x	12017	BC136601	CADPS2	93664	2.1318	0.0004	11736662_a_at	22503148	NM_001009571
24hr Induction Genes 2.0x	12017	NM_181726	ANKRD37	353322	2.1309	0.0048	11721917_a_at	22488403	NM_181726
24hr Induction Genes 2.0x	12017	U22398	CDKN1C	1028	2.1289	0.0014	11729118_a_at	22495604	NM_000076
24hr Induction Genes 2.0x	12017	AB062112	HLA-DRB1 /// HLA-DRB3 /// HLA-DRB4 /// HLA-DRB5 /// LOC100507709 /// LOC100507714	100507709	2.1277	0.0005	11723194_x_at	22489680	NM_001243965
24hr Induction Genes 2.0x	12017	BM989371	SSH1	54434	2.1235	0.0067	11754318_at	22520804	NM_001161330
24hr Induction Genes 2.0x	12017	NM_005168	RND3	390	2.1205	0	11737760_s_at	22504246	NM_001254738
24hr Induction Genes 2.0x	12017	NM_024420	PLA2G4A	5321	2.1161	0.0007	11727754_a_at	22494240	NM_024420
24hr Induction Genes 2.0x	12017	BQ000521	IDS	3423	2.1135	0.0083	11732132_a_at	22498618	NM_000202
24hr Induction Genes 2.0x	12017	AK055642	CAMK2D	817	2.1133	0.0046	11740063_a_at	22506549	NM_001221
24hr Induction Genes 2.0x	12017	NM_014950	ZBTB1	22890	2.1107	0.0057	11733178_a_at	22499664	NM_001123329
24hr Induction Genes 2.0x	12017	BC017423	MIER1	57708	2.109	0.0024	11739969_a_at	22506455	NM_001077700
24hr Induction Genes 2.0x	12017	NM_017526	LEPROT	54741	2.1081	0	11725678_s_at	22492164	NM_001198681
24hr Induction Genes 2.0x	12017	BC011625	ZNF503	84858	2.1067	0	11731596_a_at	22498082	NM_032772
24hr Induction Genes 2.0x	12017	NM_016315	GULP1	51454	2.1038	0.0013	11728305_s_at	22494791	NM_001252668
24hr Induction Genes 2.0x	12017	BF790656	TOB1	10140	2.0968	0.0141	11758325_s_at	22524811	NM_001243877
24hr Induction Genes 2.0x	12017	CA307233	SNX9	51429	2.0966	0.0005	11756208_a_at	22522694	NM_016224
24hr Induction Genes 2.0x	12017	AI800709	ANK3	288	2.0962	0.0004	11721206_x_at	22487692	NM_001149
24hr Induction Genes 2.0x	12017	NM_207627	ABCG1	9619	2.0959	0.0014	11725517_x_at	22492003	NM_004915
24hr Induction Genes 2.0x	12017	NM_020711	ERMN	57471	2.0957	0.0001	11739015_a_at	22505501	NM_001009959
24hr Induction Genes 2.0x	12017	AK126968	CSNK1G1	53944	2.0956	0.0048	11739731_s_at	22506217	NM_022048
24hr Induction Genes 2.0x	12017	CA941893	TACC1	6867	2.0951	0.0079	11744358_x_at	22510844	NM_001122824
24hr Induction Genes 2.0x	12017	AK300246	FN1	2335	2.0936	0.0001	11749460_x_at	22515946	NM_002026
24hr Induction Genes 2.0x	12017	L01639	CXCR4	7852	2.0927	0.0092	11739094_a_at	22505580	NM_001008540
24hr Induction Genes 2.0x	12017	NM_172069	PLEKHH2	130271	2.0912	0.0104	11720452_at	22486938	NM_172069
24hr Induction Genes 2.0x	12017	BC007093	CCNG1	900	2.0891	0.0001	11740980_x_at	22507466	NM_004060
24hr Induction Genes 2.0x	12017	BF025955	TSPAN14	81619	2.0887	0.0006	11718512_x_at	22484998	NM_001128309
24hr Induction Genes 2.0x	12017	CA778103	CERS6	253782	2.0886	0.0006	11755520_s_at	22522006	NM_001256126
24hr Induction Genes 2.0x	12017	D16217	CAST	831	2.0861	0	11722584_a_at	22489070	NM_001042440
24hr Induction Genes 2.0x	12017	NM_022918	TMEM135	65084	2.0857	0.0041	11725902_s_at	22492388	NM_001168724
24hr Induction Genes 2.0x	12017	CA774643	WASL	8976	2.0842	0.0008	11717284_a_at	22483770	NM_003941
24hr Induction Genes 2.0x	12017	AK291830	NOX4	50507	2.083	0.0209	11740475_x_at	22506961	NM_001143836
24hr Induction Genes 2.0x	12017	AK298939	SDC2	6383	2.0806	0.0001	11746798_x_at	22513284	NM_002998
24hr Induction Genes 2.0x	12017	BC032139	HP1BP3	50809	2.0801	0.0034	11746051_a_at	22512537	NM_016287
24hr Induction Genes 2.0x	12017	AU158582	ARHGEF37	389337	2.0793	0.0018	11756078_a_at	22522564	NM_001001669
24hr Induction Genes 2.0x	12017	BC018686	USP25	29761	2.0783	0.0002	11755051_a_at	22521537	NM_013396
24hr Induction Genes 2.0x	12017	CR605750	CDKN1C	1028	2.0757	0.0002	11763718_x_at	22530204	NM_000076
24hr Induction Genes 2.0x	12017	AK300458	FN1	2335	2.0747	0	11745837_x_at	22512323	NM_002026
24hr Induction Genes 2.0x	12017	BX489279	CBL	867	2.0737	0.003	11724809_at	22491295	NM_005188
24hr Induction Genes 2.0x	12017	AI685912	SHROOM3	57619	2.0729	0.0002	11758489_s_at	22524975	NM_020859
24hr Induction Genes 2.0x	12017	AB208816	CAST	831	2.0708	0	11755834_x_at	22522320	NM_001042440
24hr Induction Genes 2.0x	12017	NM_152748	KIAA1324L	222223	2.068	0.0182	11741802_a_at	22508288	NM_001142749
24hr Induction Genes 2.0x	12017	AK316350	FN1	2335	2.0661	0.0007	11739536_x_at	22506022	NM_002026
24hr Induction Genes 2.0x	12017	AK296118	SERINC2	347735	2.0661	0.0011	11748053_x_at	22514539	NM_001199037
24hr Induction Genes 2.0x	12017	NM_138420	AHNAK2	113146	2.0636	0.0022	11717132_s_at	22483618	NM_138420
24hr Induction Genes 2.0x	12017	AK297005	S1PR1	1901	2.063	0.0069	11752382_a_at	22518868	NM_001400
24hr Induction Genes 2.0x	12017	CA313460			2.0626	0.0082	11763367_at	22529853	CA313460
24hr Induction Genes 2.0x	12017	AA709403	GABARAPL1	23710	2.0624	0.0008	11758023_x_at	22524509	NM_031412
24hr Induction Genes 2.0x	12017	AK093948	MCOLN3	55283	2.0614	0.0073	11746600_a_at	22513086	NM_001253693
24hr Induction Genes 2.0x	12017	NM_000202	IDS	3423	2.0607	0.0001	11732131_x_at	22498617	NM_000202
24hr Induction Genes 2.0x	12017	BC021675	TSPAN2	10100	2.0589	0.0007	11728388_at	22494874	NM_005725
24hr Induction Genes 2.0x	12017	CF132350	PXDN	7837	2.0577	0.0001	11754993_s_at	22521479	NM_012293
24hr Induction Genes 2.0x	12017	NM_004833	AIM2	9447	2.0574	0.0002	11730457_a_at	22496943	NM_004833
24hr Induction Genes 2.0x	12017	AK302568	ZBTB38	253461	2.0566	0.0002	11728734_at	22495220	NM_001080412
24hr Induction Genes 2.0x	12017	AK002113	EXOC6	54536	2.0542	0.0018	11755493_a_at	22521979	NM_001013848
24hr Induction Genes 2.0x	12017	NM_138420	AHNAK2	113146	2.0541	0.0002	11717131_a_at	22483617	NM_138420
24hr Induction Genes 2.0x	12017	NM_020440	PTGFRN	5738	2.0533	0	11717340_at	22483826	NM_020440
24hr Induction Genes 2.0x	12017	NM_001012334	MDK	4192	2.0533	0.0012	11718037_x_at	22484523	NM_001012333
24hr Induction Genes 2.0x	12017	NM_012434	SLC17A5	26503	2.0521	0.0021	11723476_at	22489962	NM_012434
24hr Induction Genes 2.0x	12017	AK315944	GUCY1B3	2983	2.0512	0.0007	11745987_a_at	22512473	NM_000857
24hr Induction Genes 2.0x	12017	NM_016824	ADD3	120	2.0503	0.0001	11717348_a_at	22483834	NM_001121
24hr Induction Genes 2.0x	12017	NM_005587	MEF2A	4205	2.0473	0.0007	11718097_a_at	22484583	NM_001130926
24hr Induction Genes 2.0x	12017	AK309579	IRF2BP2	359948	2.0448	0.0285	11756646_a_at	22523132	NM_001077397
24hr Induction Genes 2.0x	12017	AK292418	MSMO1	6307	2.0444	0.0003	11741012_a_at	22507498	NM_001017369
24hr Induction Genes 2.0x	12017	NM_004772	NREP	9315	2.0444	0.0136	11724481_a_at	22490967	NM_001142474
24hr Induction Genes 2.0x	12017	NM_014570	ARFGAP3	26286	2.0398	0.0001	11717442_s_at	22483928	NM_001142293
24hr Induction Genes 2.0x	12017	AL833232	HMCN1	83872	2.0397	0.0001	11755071_a_at	22521557	NM_031935
24hr Induction Genes 2.0x	12017	BC009615	OTUB2	78990	2.0386	0.0024	11753488_a_at	22519974	NM_023112
24hr Induction Genes 2.0x	12017	BC004869	FAXC	84553	2.0383	0.0034	11727990_at	22494476	NM_032511
24hr Induction Genes 2.0x	12017	AK300814	MSL3	10943	2.0377	0.0023	11748254_s_at	22514740	NM_001193270
24hr Induction Genes 2.0x	12017	BC020921	ITSN2	50618	2.0368	0.0046	11723180_a_at	22489666	NM_006277
24hr Induction Genes 2.0x	12017	DB354916	H6PD	9563	2.0345	0.0055	11729857_at	22496343	NM_004285
24hr Induction Genes 2.0x	12017	AF127563	DKK1	22943	2.0344	0	11718141_at	22484627	NM_012242
24hr Induction Genes 2.0x	12017	AF327443	CAST	831	2.0343	0.0021	11744916_x_at	22511402	NM_001042440
24hr Induction Genes 2.0x	12017	NM_001102426	TBC1D8	11138	2.0336	0	11723525_at	22490011	NM_001102426
24hr Induction Genes 2.0x	12017	BQ018715	TMCC1	23023	2.033	0.0034	11740096_a_at	22506582	NM_001017395
24hr Induction Genes 2.0x	12017	NM_004060	CCNG1	900	2.0329	0.0002	11715674_s_at	22482160	NM_004060
24hr Induction Genes 2.0x	12017	AA904865	CCDC85A	114800	2.032	0.0125	11744318_at	22510804	NM_001080433
24hr Induction Genes 2.0x	12017	BC012907	MXI1	4601	2.0313	0.0005	11730498_s_at	22496984	NM_001008541
24hr Induction Genes 2.0x	12017	NM_017577	GRAMD1C	54762	2.0313	0.0029	11720901_a_at	22487387	NM_001172105
24hr Induction Genes 2.0x	12017	NM_004289	NFE2L3	9603	2.0311	0.0015	11722661_at	22489147	NM_004289
24hr Induction Genes 2.0x	12017	CR620887	RASSF2	9770	2.0301	0.0091	11756566_a_at	22523052	NM_014737
24hr Induction Genes 2.0x	12017	NM_001083	PDE5A	8654	2.0299	0.0014	11720579_a_at	22487065	NM_001083
24hr Induction Genes 2.0x	12017	NM_001098478	HLA-F	3134	2.0299	0.0041	11734530_x_at	22501016	NM_001098478
24hr Induction Genes 2.0x	12017	AF311903	TSPAN14	81619	2.0296	0.0003	11718514_s_at	22485000	NM_001128309
24hr Induction Genes 2.0x	12017	NM_001102367	C14orf159	80017	2.0283	0.0017	11718190_s_at	22484676	NM_001102366
24hr Induction Genes 2.0x	12017	NM_024721	ZFHX4	79776	2.0275	0.0017	11729328_s_at	22495814	NM_024721
24hr Induction Genes 2.0x	12017	BC136404	EREG	2069	2.0265	0.0032	11732718_at	22499204	NM_001432
24hr Induction Genes 2.0x	12017	AK295071	TACC1	6867	2.0247	0.0013	11745847_x_at	22512333	NM_001122824
24hr Induction Genes 2.0x	12017	AK291759	PJA2	9867	2.024	0.0069	11719114_a_at	22485600	NM_014819
24hr Induction Genes 2.0x	12017	AL834243	UACA	55075	2.0227	0.0041	11763843_a_at	22530329	NM_001008224
24hr Induction Genes 2.0x	12017	NM_030927	TSPAN14	81619	2.0199	0.0001	11718513_x_at	22484999	NM_001128309
24hr Induction Genes 2.0x	12017	NM_001012994	SNX30	401548	2.0188	0.0008	11721960_a_at	22488446	NM_001012994
24hr Induction Genes 2.0x	12017	AI446767	CXCL2	2920	2.0187	0.0029	11744127_at	22510613	NM_002089
24hr Induction Genes 2.0x	12017	BU617001	RGS4	5999	2.0176	0.001	11732994_a_at	22499480	NM_001102445
24hr Induction Genes 2.0x	12017	g218505834	MAGI3	260425	2.0159	0.0026	11715222_at	22481708	NM_001142782
24hr Induction Genes 2.0x	12017	AK294068	SLC17A5	26503	2.0158	0.0111	11753191_a_at	22519677	NM_012434
24hr Induction Genes 2.0x	12017	NM_032088	PCDHGA1 /// PCDHGA10 /// PCDHGA11 /// PCDHGA12 /// PCDHGA2 /// PCDHGA3 /// PCDHGA4 /// PCDHGA5 ///	26025	2.0155	0	11716424_a_at	22482910	NM_002588
24hr Induction Genes 2.0x	12017	NM_198859	PRICKLE2	166336	2.0135	0.0014	11721987_s_at	22488473	NM_198859
24hr Induction Genes 2.0x	12017	AW005054	CAMK1D	57118	2.0127	0.0034	11744138_at	22510624	NM_020397
24hr Induction Genes 2.0x	12017	NM_001127671	LIFR	3977	2.0101	0	11722685_s_at	22489171	NM_001127671
24hr Induction Genes 2.0x	12017	BC151220	COL4A1	1282	2.0072	0	11716638_s_at	22483124	NM_001845
24hr Induction Genes 2.0x	12017	NM_004655	AXIN2	8313	2.0065	0.0001	11718452_at	22484938	NM_004655
24hr Induction Genes 2.0x	12017	AK316350	FN1	2335	2.0036	0.0001	11739535_s_at	22506021	NM_002026
24hr Induction Genes 2.0x	12017	NM_004417	DUSP1	1843	2.0027	0.0006	11715766_a_at	22482252	NM_004417
24hr Induction Genes 2.0x	12017	BX449937	HSPA1A /// HSPA1B	3303	2.0018	0.0012	11757907_x_at	22524393	NM_005345
24hr Induction Genes 2.0x	12017	CA413096	SIPA1L1	26037	2.0016	0.0042	11763274_a_at	22529760	NM_015556
24hr Induction Genes 2.0x	12017	NM_005127	CLEC2B	9976	2.0007	0.0001	11721303_at	22487789	NM_005127
24hr Induction Genes 2.0x	12017	BU630314	SLAIN2	57606	2.0007	0.0003	11723722_s_at	22490208	NM_020846
24hr Induction Genes 2.0x	12017	BC114570	NRCAM	4897	2.0006	0.0084	11746394_a_at	22512880	NM_001037132
24hr Induction Genes 2.0x	12017	AK297937	PLAT	5327	0.4998	0.001	11749809_a_at	22516295	NM_000930
24hr Induction Genes 2.0x	12017	NM_015221	DNMBP	23268	0.4992	0	11724448_a_at	22490934	NM_015221
24hr Induction Genes 2.0x	12017	AL832345	PRKCE	5581	0.4992	0.0006	11736257_at	22502743	NM_005400
24hr Induction Genes 2.0x	12017	NM_001145855	SH3BP2	6452	0.4981	0.0016	11724312_a_at	22490798	NM_001122681
24hr Induction Genes 2.0x	12017	BC093702	TXNIP	10628	0.497	0.01	11717190_s_at	22483676	NM_006472
24hr Induction Genes 2.0x	12017	NM_015131	WDR43	23160	0.4956	0.0271	11727834_at	22494320	NM_015131
24hr Induction Genes 2.0x	12017	CR620856	FAM107B	83641	0.4954	0.004	11754295_a_at	22520781	NM_031453
24hr Induction Genes 2.0x	12017	CR456952	PLAUR	5329	0.4948	0	11742819_at	22509305	NM_001005376
24hr Induction Genes 2.0x	12017	AK302893	MICAL2	9645	0.4942	0.0007	11761440_a_at	22527926	NM_014632
24hr Induction Genes 2.0x	12017	Y12395	IFRD2	7866	0.4937	0.0065	11755876_a_at	22522362	NM_006764
24hr Induction Genes 2.0x	12017	NM_003383	VLDLR	7436	0.493	0.0079	11721181_a_at	22487667	NM_001018056
24hr Induction Genes 2.0x	12017	BM913736	LOC401127 /// WDR5	11091	0.4922	0.0065	11718376_s_at	22484862	NM_017588
24hr Induction Genes 2.0x	12017	BC031101	TUBE1	51175	0.4922	0.0176	11732219_a_at	22498705	NM_016262
24hr Induction Genes 2.0x	12017	NM_001458	FLNC	2318	0.4921	0.0012	11720633_a_at	22487119	NM_001127487
24hr Induction Genes 2.0x	12017	NM_030965	ST6GALNAC5	81849	0.4916	0.0001	11727447_a_at	22493933	NM_030965
24hr Induction Genes 2.0x	12017	AY634685	FHL2	2274	0.4912	0	11741106_x_at	22507592	NM_001039492
24hr Induction Genes 2.0x	12017	CR616411	BCCIP	56647	0.4908	0.0026	11743504_at	22509990	NM_016567
24hr Induction Genes 2.0x	12017	BC063596	PTPRK	5796	0.4905	0.0041	11762135_at	22528621	NM_001135648
24hr Induction Genes 2.0x	12017	NM_002925	RGS10	6001	0.4902	0	11740375_a_at	22506861	NM_001005339
24hr Induction Genes 2.0x	12017	NM_181353	ID1	3397	0.4902	0.0002	11716195_a_at	22482681	NM_002165
24hr Induction Genes 2.0x	12017	BX392943	IER2	9592	0.4893	0.0001	11758043_s_at	22524529	NM_004907
24hr Induction Genes 2.0x	12017	NM_007189	ABCF2	10061	0.4887	0	11722025_x_at	22488511	NM_005692
24hr Induction Genes 2.0x	12017	AK304670	TXNIP	10628	0.4887	0.0011	11748544_s_at	22515030	NM_006472
24hr Induction Genes 2.0x	12017	AK075342	C12orf39	80763	0.4881	0.0002	11759005_a_at	22525491	NM_030572
24hr Induction Genes 2.0x	12017	AK300389	OSBPL6	114880	0.4881	0.0033	11750599_a_at	22517085	NM_001201480
24hr Induction Genes 2.0x	12017	AK303632	SLFN5	162394	0.488	0.0036	11752224_a_at	22518710	NM_144975
24hr Induction Genes 2.0x	12017	AK304670	TXNIP	10628	0.4876	0.0004	11748543_a_at	22515029	NM_006472
24hr Induction Genes 2.0x	12017	AF113132	PSAT1	29968	0.4874	0.0011	11741479_a_at	22507965	NM_021154
24hr Induction Genes 2.0x	12017	NM_001881	CREM	1390	0.4864	0	11724932_at	22491418	NM_001267562
24hr Induction Genes 2.0x	12017	BX642069	WDR35	57539	0.4864	0.0003	11724949_a_at	22491435	NM_001006657
24hr Induction Genes 2.0x	12017	AB053311	RAPH1	65059	0.4864	0.0198	11744816_a_at	22511302	NM_025252
24hr Induction Genes 2.0x	12017	NM_001615	ACTG2	72	0.4862	0.0013	11715793_a_at	22482279	NM_001199893
24hr Induction Genes 2.0x	12017	NM_007098	CLTCL1	8218	0.4854	0.0145	11724990_s_at	22491476	NM_001835
24hr Induction Genes 2.0x	12017	NM_133443	GPT2	84706	0.484	0.0001	11719162_a_at	22485648	NM_001142466
24hr Induction Genes 2.0x	12017	AY052783	PRSS3	5646	0.4838	0.0006	11751745_x_at	22518231	NM_001197097
24hr Induction Genes 2.0x	12017	BU622379	MRTO4	51154	0.4826	0	11758165_s_at	22524651	NM_016183
24hr Induction Genes 2.0x	12017	NM_032494	ZC3H8	84524	0.4817	0.0001	11725781_at	22492267	NM_032494
24hr Induction Genes 2.0x	12017	U20240	CEBPG	1054	0.481	0	11717694_a_at	22484180	NM_001252296
24hr Induction Genes 2.0x	12017	DB304587	POLR3G	10622	0.4796	0.0021	11758396_s_at	22524882	NM_006467
24hr Induction Genes 2.0x	12017	NM_014210	EVI2A	2123	0.4796	0.0044	11733841_a_at	22500327	NM_001003927
24hr Induction Genes 2.0x	12017	NM_175085	GART	2618	0.4789	0.0002	11722930_x_at	22489416	NM_000819
24hr Induction Genes 2.0x	12017	AY634685	FHL2	2274	0.4778	0	11741105_a_at	22507591	NM_001039492
24hr Induction Genes 2.0x	12017	AK302128	TOMM34	10953	0.4759	0.0024	11748700_a_at	22515186	NM_006809
24hr Induction Genes 2.0x	12017	AI955714	PGM2	55276	0.475	0	11758556_s_at	22525042	NM_018290
24hr Induction Genes 2.0x	12017	NM_181353	ID1	3397	0.4748	0.0001	11716196_x_at	22482682	NM_002165
24hr Induction Genes 2.0x	12017	NM_001031628	SMAGP	57228	0.4736	0.0003	11719864_a_at	22486350	NM_001031628
24hr Induction Genes 2.0x	12017	AW169241	DDIT4	54541	0.4727	0.0002	11743972_a_at	22510458	NM_019058
24hr Induction Genes 2.0x	12017	BT006840	PSAT1	29968	0.4719	0.0015	11747349_s_at	22513835	NM_021154
24hr Induction Genes 2.0x	12017	BC010860	SERPINE1	5054	0.4705	0.0005	11715636_a_at	22482122	NM_000602
24hr Induction Genes 2.0x	12017	NM_005475	SH2B3	10019	0.4692	0	11717409_at	22483895	NM_005475
24hr Induction Genes 2.0x	12017	BU733597	VEGFA	7422	0.4682	0	11725370_s_at	22491856	NM_001025366
24hr Induction Genes 2.0x	12017	BG106343	DDIT3	1649	0.4654	0.0279	11758198_s_at	22524684	NM_001195053
24hr Induction Genes 2.0x	12017	BC117142	LY6K	54742	0.4648	0.0001	11739798_a_at	22506284	NM_001160354
24hr Induction Genes 2.0x	12017	NM_001002019	PUS1	80324	0.4623	0.0052	11718027_a_at	22484513	NM_001002019
24hr Induction Genes 2.0x	12017	CR620402	TXNIP	10628	0.4607	0.0001	11756431_s_at	22522917	NM_006472
24hr Induction Genes 2.0x	12017	D13889	ID1	3397	0.4562	0.0001	11753661_a_at	22520147	NM_002165
24hr Induction Genes 2.0x	12017	NM_020704	FAM40B	57464	0.4559	0.0008	11727167_at	22493653	NM_001134336
24hr Induction Genes 2.0x	12017	BC110999	OGFRL1	79627	0.4547	0.0004	11760590_x_at	22527076	NM_024576
24hr Induction Genes 2.0x	12017	M13361	FGF1	2246	0.4502	0.0004	11739959_a_at	22506445	NM_000800
24hr Induction Genes 2.0x	12017	NM_015169	RRS1	23212	0.45	0	11719810_at	22486296	NM_015169
24hr Induction Genes 2.0x	12017	BC032100	DNAJA3	9093	0.4475	0.0007	11752183_s_at	22518669	NM_001135110
24hr Induction Genes 2.0x	12017	NM_001005377	PLAUR	5329	0.4473	0	11738053_x_at	22504539	NM_001005376
24hr Induction Genes 2.0x	12017	AK056614	RRP12	23223	0.4457	0.0001	11754793_a_at	22521279	NM_001145114
24hr Induction Genes 2.0x	12017	AK301203	TXNIP	10628	0.442	0	11752765_s_at	22519251	NM_006472
24hr Induction Genes 2.0x	12017	BC033719	SESN2	83667	0.4402	0.0011	11718324_s_at	22484810	NM_031459
24hr Induction Genes 2.0x	12017	AK300391	SERPINB8	5271	0.4393	0.004	11748180_a_at	22514666	NM_001031848
24hr Induction Genes 2.0x	12017	AK298973	IL11	3589	0.4391	0.0017	11751797_a_at	22518283	NM_000641
24hr Induction Genes 2.0x	12017	AK296851	LAMB3	3914	0.4388	0.0018	11752302_a_at	22518788	NM_000228
24hr Induction Genes 2.0x	12017	AV734189	DDIT3	1649	0.4354	0.0013	11758347_s_at	22524833	NM_001195053
24hr Induction Genes 2.0x	12017	NM_173576	MKX	283078	0.4352	0.0011	11730032_at	22496518	NM_001242702
24hr Induction Genes 2.0x	12017	NM_003954	MAP3K14	9020	0.4341	0	11724902_a_at	22491388	NM_003954
24hr Induction Genes 2.0x	12017	CR456952	PLAUR	5329	0.4308	0.0004	11742818_a_at	22509304	NM_001005376
24hr Induction Genes 2.0x	12017	NM_003612	SEMA7A	8482	0.4305	0.0003	11726572_a_at	22493058	NM_001146029
24hr Induction Genes 2.0x	12017	AY029180	PLAUR	5329	0.4286	0.0016	11743063_x_at	22509549	NM_001005376
24hr Induction Genes 2.0x	12017	NM_182679	GPATCH4	54865	0.421	0	11721648_at	22488134	NM_015590
24hr Induction Genes 2.0x	12017	AK293297	FOSL1	8061	0.4203	0.0004	11760574_x_at	22527060	NM_005438
24hr Induction Genes 2.0x	12017	BU633177	CCBE1	147372	0.4191	0.0006	11754563_a_at	22521049	NM_133459
24hr Induction Genes 2.0x	12017	AK225216	FERMT1	55612	0.4182	0	11755613_a_at	22522099	NM_017671
24hr Induction Genes 2.0x	12017	BE794289	GPATCH4	54865	0.4138	0.0004	11721649_a_at	22488135	NM_015590
24hr Induction Genes 2.0x	12017	AY029180	PLAUR	5329	0.4127	0.0044	11743062_a_at	22509548	NM_001005376
24hr Induction Genes 2.0x	12017	BU618641	SERPINE1	5054	0.4122	0.0002	11757312_x_at	22523798	NM_000602
24hr Induction Genes 2.0x	12017	AK298048	SERPINE1	5054	0.4111	0.0052	11746856_a_at	22513342	NM_000602
24hr Induction Genes 2.0x	12017	NM_001122674	ABCD3	5825	0.409	0.0019	11741592_x_at	22508078	NM_001122674
24hr Induction Genes 2.0x	12017	NM_005438	FOSL1	8061	0.4075	0.0055	11724479_x_at	22490965	NM_005438
24hr Induction Genes 2.0x	12017	NM_005438	FOSL1	8061	0.4074	0.0038	11724477_a_at	22490963	NM_005438
24hr Induction Genes 2.0x	12017	NM_153256	C10orf47	254427	0.4032	0.0009	11728844_at	22495330	NM_153256
24hr Induction Genes 2.0x	12017	BE876695	RRP15	51018	0.4005	0.0031	11733905_x_at	22500391	NM_016052
24hr Induction Genes 2.0x	12017	NM_004235	KLF4	9314	0.3985	0.0002	11719634_a_at	22486120	NM_004235
24hr Induction Genes 2.0x	12017	NM_153228	ANKFN1	162282	0.3965	0.0068	11737122_at	22503608	NM_153228
24hr Induction Genes 2.0x	12017	AK093013	MLKL	197259	0.39	0.0003	11754630_a_at	22521116	NM_001142497
24hr Induction Genes 2.0x	12017	NM_003877	SOCS2	8835	0.3869	0.0005	11735148_a_at	22501634	NM_001270467
24hr Induction Genes 2.0x	12017	NM_178517	PIGW	284098	0.3853	0.0004	11732726_x_at	22499212	NM_178517
24hr Induction Genes 2.0x	12017	NM_000641	IL11	3589	0.3777	0.0001	11727690_at	22494176	NM_000641
24hr Induction Genes 2.0x	12017	M27281	VEGFA	7422	0.3743	0.0012	11738414_a_at	22504900	NM_001025366
24hr Induction Genes 2.0x	12017	BU621175	C10orf47	254427	0.3738	0	11728843_a_at	22495329	NM_153256
24hr Induction Genes 2.0x	12017	NM_144652	LETM2	137994	0.37	0.0004	11735576_a_at	22502062	NM_001199659
24hr Induction Genes 2.0x	12017	AK301956	ODC1	4953	0.3669	0.0002	11752515_a_at	22519001	NM_002539
24hr Induction Genes 2.0x	12017	NM_031459	SESN2	83667	0.3652	0.0003	11718325_at	22484811	NM_031459
24hr Induction Genes 2.0x	12017	BC007490	LPXN	9404	0.3647	0.0007	11755522_a_at	22522008	NM_001143995
24hr Induction Genes 2.0x	12017	AK095647	PLCXD2	257068	0.3566	0.0007	11743841_at	22510327	NM_001134478
24hr Induction Genes 2.0x	12017	CR536531	LPXN	9404	0.3529	0.0001	11743169_a_at	22509655	NM_001143995
24hr Induction Genes 2.0x	12017	NM_153742	CTH	1491	0.3525	0.007	11742278_a_at	22508764	NM_001190463
24hr Induction Genes 2.0x	12017	AY359239	FBXL13	222235	0.3477	0.0008	11740804_a_at	22507290	NM_001111038
24hr Induction Genes 2.0x	12017	NM_005438	FOSL1	8061	0.3453	0.0048	11724478_s_at	22490964	NM_005438
24hr Induction Genes 2.0x	12017	BC026317	SLC16A1	6566	0.3416	0.0014	11718656_at	22485142	NM_001166496
24hr Induction Genes 2.0x	12017	NR_003704	MIR3651 /// SNORA84	100124534	0.3329	0.0004	11757146_at	22523632	NR_003704
24hr Induction Genes 2.0x	12017	NM_145032	FBXL13	222235	0.3317	0	11737032_x_at	22503518	NM_001111038
24hr Induction Genes 2.0x	12017	NM_017947	MOCOS	55034	0.3316	0.0084	11727675_at	22494161	NM_017947
24hr Induction Genes 2.0x	12017	DQ655917	FGF1	2246	0.3287	0.0008	11756653_x_at	22523139	NM_000800
24hr Induction Genes 2.0x	12017	NM_001017402	LAMB3	3914	0.2629	0.0007	11719487_a_at	22485973	NM_000228
24hr Induction Genes 2.0x	12017	NM_021158	TRIB3	57761	0.2303	0.0002	11719811_a_at	22486297	NM_021158
24hr Induction Genes 2.0x	12017	NM_001143818	SERPINB2	5055	0.2056	0.0013	11716631_s_at	22483117	NM_001143818
24hr Induction Genes 2.0x	12017	AK297724	HAS2	3037	0.1788	0.0001	11749553_a_at	22516039	NM_005328
24hr Induction Genes 2.0x	12017	BC069353	HAS2	3037	0.1764	0.0015	11740311_at	22506797	NM_005328
24hr Induction Genes 2.0x	12017	AK300622	MPP4	58538	0.174	0.0002	11746094_a_at	22512580	NM_033066
24hr Induction Genes 2.0x	12017	U54804	HAS2	3037	0.1724	0.002	11740312_at	22506798	NM_005328
24hr Induction Genes 2.0x	12017	CR542179	G0S2	50486	0.1373	0	11754074_s_at	22520560	NM_015714
24hr Induction Genes 2.0x	12017	BE874862	G0S2	50486	0.1048	0.0005	11744219_at	22510705	NM_015714
24hr Induction Genes 2.0x	12017	BC063625	KRTAP2-4 /// LOC730755	730755	0.0988	0.0009	11746283_s_at	22512769	NM_001165252

## Sheet: Sox7_2.0x_Union
GENELIST_NAME	EXPID	GENEBANK ACC	GENEN AME	LOCUSID	SWISSPROT_ACC_NUMBER	SPOTID	REFSEQ
Sox7_2.0x_Union.txt	12017	g31791013	KRTAP20-2	337976	Q3LI61	22481631	NM_181616
Sox7_2.0x_Union.txt	12017	g218505834	MAGI3	260425	Q5TCQ9	22481708	NM_001142782
Sox7_2.0x_Union.txt	12017	g22035683	AREG /// AREGB	374	D6RFX5 P15514 Q5U026	22481792	NM_001657
Sox7_2.0x_Union.txt	12017	NM_001430	EPAS1 /// LOC100652809	100652809	B3KW07 C9J9N2 Q99814	22481897	NM_001430
Sox7_2.0x_Union.txt	12017	BM563260	SCD	6319	O00767 Q59GX7	22482047	NM_005063
Sox7_2.0x_Union.txt	12017	BM563260	LOC100652751 /// LOC100653313 /// SCD	100652751	O00767 Q59GX7	22482048	NM_005063
Sox7_2.0x_Union.txt	12017	NM_003022	SH3BGRL	6451	B0AZV6 O75368	22482110	NM_003022
Sox7_2.0x_Union.txt	12017	BC010860	SERPINE1	5054	B7Z1D9 B7Z4S0 B7Z4X6 B7ZAB0 C9J272 F8WD53 P05121	22482122	NM_000602
Sox7_2.0x_Union.txt	12017	NM_018948	ERRFI1	54206	B3KTV8 Q9UJM3	22482145	NM_018948
Sox7_2.0x_Union.txt	12017	NM_003641	IFITM1	8519	H7BYV1 H7BZN2 P13164	22482156	NM_003641
Sox7_2.0x_Union.txt	12017	NM_003641	IFITM1	8519	H7BZN2 P13164	22482157	NM_003641
Sox7_2.0x_Union.txt	12017	NM_004060	CCNG1	900	B4DLW7 D6RCC5 D6RD30 D6RGX3 E7ERZ1 P51959 Q7Z396	22482160	NM_004060
Sox7_2.0x_Union.txt	12017	NM_003739	AKR1C3	8644	B4DKT3 B4DL37 P42330 Q2XPP3	22482197	NM_001253908
Sox7_2.0x_Union.txt	12017	NM_001387	DPYSL3	1809	B4DLZ4 D6RF19 F5GWI3 H0YB87 H0YBT4 Q14195 Q6DEN2 Q8IXW6	22482237	NM_001197294
Sox7_2.0x_Union.txt	12017	NM_004417	DUSP1	1843	B4DNT2 B4DQ64 B4DRR4 B4DU40 B4E2X6 F5H3Z1 P28562	22482252	NM_004417
Sox7_2.0x_Union.txt	12017	NM_001615	ACTG2	72	B3KW67 B4E315 E9PG30 F8WB63 P63267	22482279	NM_001199893
Sox7_2.0x_Union.txt	12017	BC007038	LUM	4060	P51884 Q53FV4	22482282	NM_002345
Sox7_2.0x_Union.txt	12017	NM_013230	CD24	100133941	B6EC88 P25063	22482404	NM_013230
Sox7_2.0x_Union.txt	12017	NM_001143676	SGK1	6446	B7Z1G1 B7Z325 E9PJN2 E9PP33 E9PR89 H0YCJ3 O00141 Q7Z3I4	22482417	NM_001143676
Sox7_2.0x_Union.txt	12017	NM_004335	BST2	684	B4E0Z6 E7EPE1 Q10589 Q7Z5Z8	22482520	NM_004335
Sox7_2.0x_Union.txt	12017	NM_004335	BST2	684	B4E0Z6 Q10589 Q7Z5Z8	22482521	NM_004335
Sox7_2.0x_Union.txt	12017	NM_004335	BST2	684	B4E0Z6 Q10589 Q7Z5Z8	22482522	NM_004335
Sox7_2.0x_Union.txt	12017	NM_020182	PMEPA1	56937	A2A2F4 A2A2F5 Q5JY37 Q66K30 Q8NER4 Q969W9	22482635	NM_001255976
Sox7_2.0x_Union.txt	12017	BF028433	PMEPA1	56937	A2A2F4 A2A2F5 Q5JY37 Q66K30 Q8NER4 Q969W9	22482636	NM_001255976
Sox7_2.0x_Union.txt	12017	CA448065	PMEPA1	56937	A2A2F4 A2A2F5 Q5JY37 Q66K30 Q8NER4 Q969W9	22482637	NM_001255976
Sox7_2.0x_Union.txt	12017	BC126434	LBH	81606	B5MBX5 B5MC28 B5MCM2 B5MCP4 F8WC18 Q53QV2 Q7LC25 Q8WYI9	22482647	NM_030915
Sox7_2.0x_Union.txt	12017	NM_030915	LBH	81606	B5MBX5 B5MC28 B5MCM2 B5MCP4 F8WC18 Q53QV2 Q7LC25 Q8WYI9	22482648	NM_030915
Sox7_2.0x_Union.txt	12017	NM_181353	ID1	3397	P41134	22482681	NM_002165
Sox7_2.0x_Union.txt	12017	NM_181353	ID1	3397	P41134	22482682	NM_002165
Sox7_2.0x_Union.txt	12017	NM_130444	COL18A1	80781	D3DSM4 D3DSM5 F5GZA2 F8WDA7 H7BXV5 P39060	22482767	NM_030582
Sox7_2.0x_Union.txt	12017	NM_001014438	CARS	833	A8K067 A8MVQ3 B4DI19 B4DKY1 B4DPV7 C9JLN0 E9PLP0 E9PPK8 E9PRS8 P49589 Q53HG6 Q59HE5	22482780	NM_001014437
Sox7_2.0x_Union.txt	12017	M14648	ITGAV	3685	A5YM53 B4DYQ7 B7Z883 B7ZLX0 E7EWZ6 H7BZG1 P06756	22482786	NM_001144999
Sox7_2.0x_Union.txt	12017	NM_198336	INSIG1	3638	A4D2N1 C9JSG8 F5H6P3 H7C5L3 O15503	22482823	NM_005542
Sox7_2.0x_Union.txt	12017	BE300521	INSIG1	3638	A4D2N1 C9JSG8 F5H6P3 H7C5L3 O15503	22482824	NM_005542
Sox7_2.0x_Union.txt	12017	W72044	INSIG1	3638	A4D2N1 C9JSG8 F5H6P3 H7C5L3 O15503	22482825	NM_005542
Sox7_2.0x_Union.txt	12017	NM_002230	JUP	3728	P14923	22482829	NM_002230
Sox7_2.0x_Union.txt	12017	NM_133436	ASNS	440	B4DXZ1 B4DY32 B7ZAA9 C9J057 C9J605 C9JLA3 C9JLN6 C9JM09 C9JT45 E9PCI3 E9PCX6 F8WEJ5 P08243	22482850	NM_001178075
Sox7_2.0x_Union.txt	12017	NM_032088	PCDHGA1 /// PCDHGA10 /// PCDHGA11 /// PCDHGA12 /// PCDHGA2 /// PCDHGA3 /// PCDHGA4 /// PCDHGA5 ///	26025	A4FU17 A4FUP3 A4FUP4 A4IF48 A4IF53 O15201 O15203 O60330 Q2M272 Q2M273 Q3SY74 Q52LL2 Q59GD1 Q59H01 Q59H32 Q8TAJ2 Q9BR81 Q9BT64 Q9UN70 Q9UN71 Q9Y5F6 Q9Y5F7 Q9Y5F8 Q9Y5F9 Q9Y5G0 Q9Y5G1 Q9Y5G2 Q9Y5G3 Q9Y5G4 Q9Y5G5 Q9Y5G6 Q9Y5G7 Q9Y5G8 Q9Y5G9 Q9Y5H0 Q9Y5H1 Q9Y5H2 Q9Y5H3 Q9Y5H4	22482910	NM_002588
Sox7_2.0x_Union.txt	12017	NM_001037582	SCD5	79966	Q86SK9 Q86UC8 Q9BSN4	22482919	NM_001037582
Sox7_2.0x_Union.txt	12017	NM_006120	HLA-DMA	3108	A2AAT8 B0UYV8 B0UYV9 B0UYW0 B7Z4Y5 F6U6B3 H0Y6G5 H0Y6X3 H0Y706 H0Y732 H0Y7C5 H0Y7R6 H0Y7X9 P28067 Q31604 Q5SP00 Q6ICR9	22483040	NM_006120
Sox7_2.0x_Union.txt	12017	NM_018433	KDM3A	55818	B4E2H5 C9J7Q7 C9JC73 F5H070 F5H4E6 F8WE62 Q9Y4C1	22483059	NM_001146688
Sox7_2.0x_Union.txt	12017	NM_018433	KDM3A	55818	B4E2H5 C9J7Q7 C9JC73 F5H070 F5H4E6 F8WE62 Q9P0K0 Q9Y4C1	22483060	NM_001146688
Sox7_2.0x_Union.txt	12017	NM_001143818	SERPINB2	5055	B2R7Y0 E7EPJ9 E7ERB5 E9PDK7 P05120	22483117	NM_001143818
Sox7_2.0x_Union.txt	12017	NM_001605	AARS	16	B4DR45 H3BPK7 P49588	22483122	NM_001605
Sox7_2.0x_Union.txt	12017	BC151220	COL4A1	1282	A5PKV2 A9LSU1 F5H5K0 F8WEC9 P02462 Q59F15	22483124	NM_001845
Sox7_2.0x_Union.txt	12017	NM_004864	GDF15	9518	Q99988	22483149	NM_004864
Sox7_2.0x_Union.txt	12017	NM_004864	GDF15	9518	Q99988	22483150	NM_004864
Sox7_2.0x_Union.txt	12017	BQ645920	GDF15	9518	Q99988	22483151	NM_004864
Sox7_2.0x_Union.txt	12017	NM_003007	SEMG1	6406	A0JLP2 P04279	22483188	NM_003007
Sox7_2.0x_Union.txt	12017	NM_013993	DDR1 /// MIR4640	100616237	A2ABK8 A2ABK9 A2ABL0 A2ABL1 A2ABL2 A2ABM8 B7Z3A2 B8JJ50 B8JJ51 D6R9C4 D6RAJ3 D6RB35 D6RB82 D6RBU7 D6RGW5 E7EN94 E7ENJ2 E7EPH4 E7EPN2 E7EQ23 E7EQ30 E7ERI6 E7ERN0 E7ES06 E7ESR9 E7ETI3 E7ETX3 E7EUD5 E7EUP7 E7EVT1 E7EVW6 E7EX99 E7EXB0 F5H786 F8VYL2 H0Y4U0 H0Y717 H0Y9F4 H0YAH6 Q08345 Q6ZNR9 Q96T61 Q96T62	22483194	NM_001202521
Sox7_2.0x_Union.txt	12017	NM_004753	DHRS3	9249	O75911 Q0QD44 Q53HI7 Q5SUY4	22483321	NM_004753
Sox7_2.0x_Union.txt	12017	NM_005628	SLC1A5	6510	B4DE27 B4DR77 B4DWS4 B7ZB81 E9PC01 Q15758 Q59ES3 Q71UA6	22483352	NM_001145144
Sox7_2.0x_Union.txt	12017	NM_001001924	MTUS1	57509	B4DH03 B4E246 H0YC63 Q9ULD2	22483399	NM_001001924
Sox7_2.0x_Union.txt	12017	BC136320	MTUS1	57509	B4DH03 B4E246 H0YC63 Q9ULD2	22483400	NM_001001924
Sox7_2.0x_Union.txt	12017	BM983699	MTUS1	57509	B4DH03 B4E246 H0YC63 Q9ULD2	22483401	NM_001001924
Sox7_2.0x_Union.txt	12017	CD243383	TRIB2	28951	B5MCX4 F8WA18 Q92519	22483426	NM_021643
Sox7_2.0x_Union.txt	12017	N90777	NRP2	8828	A8K4G9 B7ZL68 C9JH98 E9PF66 F5H1G4 F5H2X3 O60462 Q7LBX6 Q7Z3T9 Q96GU8 Q9H2E2	22483456	NM_003872
Sox7_2.0x_Union.txt	12017	BC112053	FKBP9 /// FKBP9L	11328	A7YQ73 A8K073 B3KQQ0 B7Z1G9 B7Z1U8 B7Z230 B7Z6H3 B7Z994 B7ZAH5 C9J4P8 O95302 Q59FV7 Q75LS8	22483489	NM_007270
Sox7_2.0x_Union.txt	12017	NM_007270	FKBP9 /// FKBP9L	11328	A7YQ73 A8K073 B3KQQ0 B7Z1G9 B7Z1U8 B7Z230 B7Z6H3 B7Z994 B7ZAH5 C9J4P8 O95302 Q59FV7 Q75LS8	22483490	NM_007270
Sox7_2.0x_Union.txt	12017	NM_030674	SLC38A1	81539	F8VX04 F8VX12 Q8NCD8 Q9H2H9	22483588	NM_001077484
Sox7_2.0x_Union.txt	12017	NM_030674	SLC38A1	81539	F8VX04 F8VX12 Q8NCD8 Q9H2H9	22483589	NM_001077484
Sox7_2.0x_Union.txt	12017	NM_138420	AHNAK2	113146	Q8IVF2	22483617	NM_138420
Sox7_2.0x_Union.txt	12017	NM_138420	AHNAK2	113146	Q8IVF2	22483618	NM_138420
Sox7_2.0x_Union.txt	12017	NM_019096	GTPBP2	54676	A8K2K2 E9PFN6 H0Y4M5 H0Y5J1 H0Y7A5 H0YF05 Q9BX10	22483670	NM_019096
Sox7_2.0x_Union.txt	12017	BC093702	TXNIP	10628	B4DVM7 B4DVR8 B4E3D3 F6RIS4 Q9H3M7	22483676	NM_006472
Sox7_2.0x_Union.txt	12017	CA774643	WASL	8976	A1JUI9 A8K180 F5GY97 F8WAS5 O00401 Q68DE4	22483770	NM_003941
Sox7_2.0x_Union.txt	12017	NM_020440	PTGFRN	5738	A4QPA1 H0YFT2 Q1WWL2 Q4QQP8 Q9H3U3 Q9P2B2	22483826	NM_020440
Sox7_2.0x_Union.txt	12017	NM_016824	ADD3	120	Q53FL4 Q59EK1 Q5VU08 Q9UEY8	22483834	NM_001121
Sox7_2.0x_Union.txt	12017	NM_005475	SH2B3	10019	B7Z7K6 F5GYM4 F8VZW1 Q59H48 Q96BA5 Q9UQQ2	22483895	NM_005475
Sox7_2.0x_Union.txt	12017	NM_014570	ARFGAP3	26286	B0QYV8 B0QYV9 B7Z4Q0 B7Z6L2 C9JZR4 E9PB03 H0Y6A0 H0Y7G0 Q9NP61	22483928	NM_001142293
Sox7_2.0x_Union.txt	12017	NM_001024948	FNBP1L	54874	B4DKY5 B4DSI7 B4DSW1 B7Z9L6 Q5T0N5	22484038	NM_001024948
Sox7_2.0x_Union.txt	12017	NM_014059	RGCC	28984	Q9H4X1	22484068	NM_014059
Sox7_2.0x_Union.txt	12017	NM_005841	SPRY1	10252	D6REX7 D6RHD2 D6RIE6 O43609	22484138	NM_001258038
Sox7_2.0x_Union.txt	12017	NM_001806	CEBPG	1054	P53567	22484179	NM_001252296
Sox7_2.0x_Union.txt	12017	U20240	CEBPG	1054	P53567	22484180	NM_001252296
Sox7_2.0x_Union.txt	12017	NM_004877	GMFG	9535	O60234 Q6IB37	22484246	NM_004877
Sox7_2.0x_Union.txt	12017	NM_004089	TSC22D3	1831	B2R4H9 B3KXT7 B4DU81 Q5JRJ2 Q99576	22484315	NM_001015881
Sox7_2.0x_Union.txt	12017	NM_004419	DUSP5	1847	Q16690 Q59EI8	22484349	NM_004419
Sox7_2.0x_Union.txt	12017	AI972268	PSME4	23198	F8WB44 F8WBH5 G1UI18 Q14997	22484350	NM_014614
Sox7_2.0x_Union.txt	12017	NM_001130445	SSFA2	6744	B3KXT1 B4DP45 B4DQT6 B4E2E5 E7END2 E7EUL7 E9PHV5 F2Z295 H7BZ26 H7BZN0 P28290	22484507	NM_001130445
Sox7_2.0x_Union.txt	12017	NM_001130445	SSFA2	6744	B3KXT1 B4DP45 B4DQT6 B4E2E5 E7END2 E7EUL7 E9PHV5 F2Z295 H7BZ26 H7BZN0 P28290	22484508	NM_001130445
Sox7_2.0x_Union.txt	12017	AK291745	SSFA2	6744	B3KXT1 B4DP45 B4DQT6 B4E2E5 E7END2 E7EUL7 E9PHV5 F2Z295 H7BZ26 H7BZN0 P28290	22484509	NM_001130445
Sox7_2.0x_Union.txt	12017	NM_000877	IL1R1	3554	B8ZZ73 B8ZZW4 B9A040 C9J3W8 C9J686 C9JQ36 C9JW84 C9JWB2 F8WF92 H7BZM5 P14778 Q6NWP5 Q6NWP6	22484511	NM_000877
Sox7_2.0x_Union.txt	12017	NM_001002019	PUS1	80324	E5KMT5 E5KMT6 F5GXL3 F5GY32 F5H168 F5H1B2 F5H1S9 F8W9U5 G8JLB3 Q9Y606	22484513	NM_001002019
Sox7_2.0x_Union.txt	12017	NM_001012334	MDK	4192	E9PLM6 P21741 Q2LEK2 Q2LEK3 Q2LEK4	22484523	NM_001012333
Sox7_2.0x_Union.txt	12017	NM_001001396	ATP2B4	493	A1X4Q1 A1X4Q2 A7E2D8 A8K8U3 B1APW5 H0YDG5 H7BY13 H7BZS8 P23634 Q68DH9	22484567	NM_001001396
Sox7_2.0x_Union.txt	12017	NM_005587	MEF2A	4205	A8K720 F6XG23 F8W966 H0YKY6 H0YM62 H0YNI2 Q02078 Q7Z6C9	22484583	NM_001130926
Sox7_2.0x_Union.txt	12017	AF127563	DKK1	22943	I1W660 O94907	22484627	NM_012242
Sox7_2.0x_Union.txt	12017	NM_001102367	C14orf159	80017	B3KVU6 E5RJL7 G8JLP2 H0YB09 H0YB62 Q4LE40 Q53HP9 Q6IA66 Q7Z3D6 Q8NB88	22484676	NM_001102366
Sox7_2.0x_Union.txt	12017	NM_018950	HLA-F	3134	B3KUD8 B4DQ99 B4DT81 B4DYG3 B4E156 B7Z760 D0EV57 H0Y4C2 H0Y5J2 H0Y5Q6 H0Y7Q7 H0Y7W0 H0Y842 P30511 Q6ZUW0 Q861E9 Q861F0	22484716	NM_001098478
Sox7_2.0x_Union.txt	12017	NM_018950	HLA-F	3134	B3KUD8 B4DQ99 B4DT81 B4DYG3 B4E156 B7Z760 D0EV57 H0Y4C2 H0Y5J2 H0Y5Q6 H0Y7Q7 H0Y7W0 H0Y842 P30511 Q6ZUW0 Q861E9 Q861F0	22484717	NM_001098478
Sox7_2.0x_Union.txt	12017	BC000753	KIAA0182	23199	B3KXH7 C9JLW9 H0Y613 H7C3B5 Q14687 Q59GZ0	22484792	NM_001134473
Sox7_2.0x_Union.txt	12017	NM_014615	KIAA0182	23199	B3KXH7 C9JLW9 H0Y613 H7C3B5 Q14687 Q59GZ0	22484793	NM_001134473
Sox7_2.0x_Union.txt	12017	BC033719	SESN2	83667	P58004	22484810	NM_031459
Sox7_2.0x_Union.txt	12017	NM_031459	SESN2	83667	P58004	22484811	NM_031459
Sox7_2.0x_Union.txt	12017	W94949	PEG10	23089	B4DSP0 Q86TG7	22484844	NM_001040152
Sox7_2.0x_Union.txt	12017	BM913736	LOC401127 /// WDR5	11091	P61964 Q9H7J6	22484862	NM_017588
Sox7_2.0x_Union.txt	12017	NM_004655	AXIN2	8313	B7ZKL5 E7ES00 F5GX43 Q5H9R8 Q9Y2T1	22484938	NM_004655
Sox7_2.0x_Union.txt	12017	BF025955	TSPAN14	81619	A6NEP9 H7BXY6 Q8N2P5 Q8NG11	22484998	NM_001128309
Sox7_2.0x_Union.txt	12017	NM_030927	TSPAN14	81619	A6NEP9 H7BXY6 Q8N2P5 Q8NG11	22484999	NM_001128309
Sox7_2.0x_Union.txt	12017	AF311903	TSPAN14	81619	A6NEP9 H7BXY6 Q8N2P5 Q8NG11	22485000	NM_001128309
Sox7_2.0x_Union.txt	12017	NM_001135733	TP53INP1	94241	C9JAL6 Q96A56	22485096	NM_001135733
Sox7_2.0x_Union.txt	12017	BC026317	SLC16A1	6566	B2R6A5 B4DKS0 B4E106 P53985 Q49A45 Q5T8R3 Q5T8R4 Q5T8R5	22485142	NM_001166496
Sox7_2.0x_Union.txt	12017	NM_000875	IGF1R	3480	C9J5X1 H0YLE7 H0YMJ5 H0YNR0 H3BSZ8 P08069 Q3B833	22485191	NM_000875
Sox7_2.0x_Union.txt	12017	BC017020	SSBP2	23635	A6ND70 B7Z1J2 B7Z2L9 B7Z4K7 B7Z665 D6RAC5 D6RH18 E9PB74 E9PDA8 H0Y9M5 H0Y9V4 P81877 Q9P038	22485266	NM_001256732
Sox7_2.0x_Union.txt	12017	BC017020	SSBP2	23635	A6ND70 B7Z1J2 B7Z2L9 B7Z4K7 B7Z665 D6RAC5 D6RH18 E9PB74 E9PDA8 H0Y9M5 H0Y9V4 P81877 Q9P038	22485267	NM_001256732
Sox7_2.0x_Union.txt	12017	NM_000584	IL8	3576	C9J4T6 P10145	22485327	NM_000584
Sox7_2.0x_Union.txt	12017	CF552454	PALMD	54873	Q9NP74	22485355	NM_017734
Sox7_2.0x_Union.txt	12017	BC012570	PALMD	54873	Q9NP74	22485357	NM_017734
Sox7_2.0x_Union.txt	12017	BC136295	TGFBR3	7049	E9PAW7 E9PKY4 E9PMG7 Q03167	22485386	NM_001195683
Sox7_2.0x_Union.txt	12017	NM_003243	TGFBR3	7049	E9PAW7 E9PKY4 E9PMG7 Q03167	22485387	NM_001195683
Sox7_2.0x_Union.txt	12017	NM_001042459	FILIP1L	11259	C9JN41 C9JYJ6 H7C4M0 Q4L180	22485390	NM_001042459
Sox7_2.0x_Union.txt	12017	NM_178140	PDZD2	23037	B4DGS3 B4E3P2 D6RF66 E7EUJ3 O15018 Q6ZQW2	22485398	NM_015022
Sox7_2.0x_Union.txt	12017	NM_178140	PDZD2	23037	B4DGS3 B4E3P2 D6RF66 E7EUJ3 O15018 Q6ZQW2	22485399	NM_015022
Sox7_2.0x_Union.txt	12017	NM_178140	PDZD2	23037	B4DGS3 B4E3P2 D6RF66 E7EUJ3 O15018 Q6ZQW2	22485400	NM_015022
Sox7_2.0x_Union.txt	12017	CB052020	ARID5B	84159	Q14865	22485412	NM_001244638
Sox7_2.0x_Union.txt	12017	NM_032199	ARID5B	84159	Q14865	22485413	NM_001244638
Sox7_2.0x_Union.txt	12017	NM_006290	TNFAIP3	7128	D3TTY4 D3TTY5 D3TTY6 D3TTY7 D3TTY8 D3TTY9 D3TTZ0 D3TTZ1 D3TTZ2 D3TTZ3 D3TTZ4 D3TTZ5 D3TTZ6 D3TTZ7 D3TTZ8 F5GYN2 F5H1G3 F5H7A9 P21580 Q5PY18 Q5VXQ8 Q5VXQ9 Q5VXR0	22485425	NM_006290
Sox7_2.0x_Union.txt	12017	NM_002937	RNASE4	6038	P34096 Q53XB4	22485474	NM_002937
Sox7_2.0x_Union.txt	12017	NM_004563	PCK2	5106	B4DW73 H0YKC4 H0YM31 H0YMA5 H0YML5 H0YMU6 H0YMY3 H0YNG4 H0YNH9 Q16822 Q6IB91	22485575	NM_001018073
Sox7_2.0x_Union.txt	12017	AK291759	PJA2	9867	O43164	22485600	NM_014819
Sox7_2.0x_Union.txt	12017	NM_003937	KYNU	8942	A8K4D5 A8K7T0 B8ZZA3 F8WEP1 Q16719 Q53F63	22485606	NM_001032998
Sox7_2.0x_Union.txt	12017	BC062555	GPT2	84706	B3KR40 H3BU54 Q8TD30	22485647	NM_001142466
Sox7_2.0x_Union.txt	12017	NM_133443	GPT2	84706	B3KR40 H3BU54 Q8TD30	22485648	NM_001142466
Sox7_2.0x_Union.txt	12017	NM_002357	MXD1	4084	B7ZLI7 C9JBE8 F8WBI0 Q05195	22485735	NM_001202513
Sox7_2.0x_Union.txt	12017	NM_001040619	ATF3	467	P18847 Q59GS7 Q5VTZ2 Q8NG55	22485830	NM_001030287
Sox7_2.0x_Union.txt	12017	NM_001511	CXCL1	2919	P09341	22485852	NM_001511
Sox7_2.0x_Union.txt	12017	NM_006520	DYNLT3	6990	A6NGJ0 F2Z328 P51808 Q6ICS3	22485859	NM_006520
Sox7_2.0x_Union.txt	12017	NM_058229	FBXO32	114907	Q0VAQ6 Q498Y9 Q969P5	22485880	NM_001242463
Sox7_2.0x_Union.txt	12017	BM679039	PBX1	5087	A8K5V0 B4DSC1 B7Z774 F5H4U9 F8WA05 H0YKH1 H0YKN0 H0YLB0 H0YLD4 H0YLF5 H0YLM3 H0YLT4 P40424 Q53YC7 Q68DD6	22485900	NM_001204961
Sox7_2.0x_Union.txt	12017	BC073163	GBP2	2634	P32456 Q8TCE5	22485933	NM_004120
Sox7_2.0x_Union.txt	12017	NM_001017402	LAMB3	3914	B4DL55 Q13751 Q5THA1	22485973	NM_000228
Sox7_2.0x_Union.txt	12017	NM_001957	EDNRA	1909	B4E2V6 B7Z9G6 C9JMZ7 E7ER36 P25101	22485974	NM_001166055
Sox7_2.0x_Union.txt	12017	X70683	SOX4	6659	Q06945	22486045	NM_003107
Sox7_2.0x_Union.txt	12017	BF678927	SOX4	6659	Q06945	22486046	NM_003107
Sox7_2.0x_Union.txt	12017	BF678927	SOX4	6659	Q06945	22486047	NM_003107
Sox7_2.0x_Union.txt	12017	NM_003107	SOX4	6659	Q06945	22486048	NM_003107
Sox7_2.0x_Union.txt	12017	BM674255	SOX4	6659	Q06945	22486049	NM_003107
Sox7_2.0x_Union.txt	12017	U70663	KLF4	9314	B7ZBT1 B7ZBT2 F2VTX5 O43474 Q5T3J6	22486119	NM_004235
Sox7_2.0x_Union.txt	12017	NM_004235	KLF4	9314	B7ZBT1 B7ZBT2 F2VTX5 O43474 Q5T3J6	22486120	NM_004235
Sox7_2.0x_Union.txt	12017	NM_004585	RARRES3	5920	A6NG31 Q9UL19	22486178	NM_004585
Sox7_2.0x_Union.txt	12017	NM_001034850	FAM134B	54463	H0Y9U4 Q9H6L5	22486222	NM_001034850
Sox7_2.0x_Union.txt	12017	NM_015169	RRS1	23212	Q15050	22486296	NM_015169
Sox7_2.0x_Union.txt	12017	NM_021158	TRIB3	57761	B0QYQ2 B4DMM9 Q96RU7	22486297	NM_021158
Sox7_2.0x_Union.txt	12017	NM_001031628	SMAGP	57228	O95332 Q0VAQ4 Q7L5E9	22486350	NM_001031628
Sox7_2.0x_Union.txt	12017	NM_006417	IFI44	10561	B4DYN8 B7ZAG3 B7ZB11 H7C1F3 Q8TCB0	22486372	NM_006417
Sox7_2.0x_Union.txt	12017	NM_000576	IL1B	3553	B5BUQ8 C9JSC2 C9JVK0 C9JWV2 O43645 P01584	22486402	NM_000576
Sox7_2.0x_Union.txt	12017	BU741622	RBM12	10137	A6PVI0 A6PVI1 B3KQH4 B4DRP9 Q5JX62 Q69YJ7 Q99829 Q9NTZ6	22486410	NM_001198838
Sox7_2.0x_Union.txt	12017	BC012787	RBM12	10137	A6PVI0 A6PVI1 B3KQH4 B4DRP9 Q5JX62 Q69YJ7 Q99829 Q9NTZ6	22486411	NM_001198838
Sox7_2.0x_Union.txt	12017	M25756	SCG2	7857	B4DQJ6 C9JDT0 C9JQI2 E7EW97 P13521	22486516	NM_003469
Sox7_2.0x_Union.txt	12017	AK290358	SLC26A2	1836	C9JAN6 H0YA38 P50443 Q7Z4B6 Q7Z4C0	22486591	NM_000112
Sox7_2.0x_Union.txt	12017	BC059390	SLC26A2	1836	C9JAN6 H0YA38 P50443 Q7Z4B6 Q7Z4C0	22486592	NM_000112
Sox7_2.0x_Union.txt	12017	M15036	PROS1	5627	B4E1L6 C9K0R0 G5E9F8 H7BXT0 P07225 Q16519 Q9NSD0	22486620	NM_000313
Sox7_2.0x_Union.txt	12017	NM_006084	IRF9	10379	B4DI86 H0YMB0 H0YMB6 H0YNM9 H0YNP4 H7BXP4 Q00978 Q96EP0	22486694	NM_006084
Sox7_2.0x_Union.txt	12017	NM_006084	IRF9	10379	B4DI86 H0YMB0 H0YMB6 H0YNM9 H0YNP4 H7BXP4 Q00978 Q96EP0	22486695	NM_006084
Sox7_2.0x_Union.txt	12017	NM_001565	CXCL10	3627	P02778	22486784	NM_001565
Sox7_2.0x_Union.txt	12017	BC146780	TMEM2	23670	B3KNL9 B4DTX3 B4E1B9 F5GZC1 F5H6B2 H3BLX9 H3BLY0 Q9UHN6	22486853	NM_001135820
Sox7_2.0x_Union.txt	12017	NM_001127257	SLC39A10	57181	B4DGU0 C9J0F5 E7ENT5 E7EV45 F2Z341 Q05C42 Q8NC35 Q9ULF5	22486877	NM_001127257
Sox7_2.0x_Union.txt	12017	NM_013231	FLRT2 /// LOC100506718	100506718	B3KPR2 B4DM15 O43155	22486919	NM_013231
Sox7_2.0x_Union.txt	12017	NM_172069	PLEKHH2	130271	E5RGK1 H0YBV1 Q8IVE3	22486938	NM_172069
Sox7_2.0x_Union.txt	12017	AF172398	F11R	50848	B7Z5W1 B7Z941 Q6FIB4 Q9Y5B2 Q9Y624	22486946	NM_016946
Sox7_2.0x_Union.txt	12017	AY358896	F11R	50848	B7Z5W1 B7Z941 Q6FIB4 Q9Y5B2 Q9Y624	22486950	NM_016946
Sox7_2.0x_Union.txt	12017	AI264196	FBN1	2200	B4E3I6 F5H2N7 F6U495 F8W7L2 H0YN80 H0YND0 P35555 Q59HB9 Q9NP01	22486995	NM_000138
Sox7_2.0x_Union.txt	12017	NM_014181	LGALSL	29094	B9A055 F8WF17 Q3ZCW2	22487027	NM_014181
Sox7_2.0x_Union.txt	12017	NM_001083	PDE5A	8654	C9JGT3 G5E9C5 H0YA14 O76074 Q9P0K5 Q9P0K6	22487065	NM_001083
Sox7_2.0x_Union.txt	12017	NM_001458	FLNC	2318	B3KM41 Q14315 Q59H94	22487119	NM_001127487
Sox7_2.0x_Union.txt	12017	NM_001338	CXADR	1525	B7WPI3 D3YHP0 P78310	22487123	NM_001207063
Sox7_2.0x_Union.txt	12017	NM_001130845	BCL6	604	A5PL18 B4E2L2 B5B0A5 C9JCS5 C9JL16 P41182	22487231	NM_001130845
Sox7_2.0x_Union.txt	12017	NM_001130845	BCL6	604	A5PL18 B4E2L2 B5B0A5 C9JCS5 C9JL16 P41182	22487232	NM_001130845
Sox7_2.0x_Union.txt	12017	NM_017577	GRAMD1C	54762	A8KA99 B3KSA7 B3KUR5 B4DF12 C9J7B8 C9K0V2 E9PHT3 F8WC28 F8WCA8 Q8IYS0	22487387	NM_001172105
Sox7_2.0x_Union.txt	12017	NM_024607	PPP1R3B	79660	Q86XI6	22487520	NM_001201329
Sox7_2.0x_Union.txt	12017	NM_006072	CCL26	10344	Q9Y258	22487535	NM_006072
Sox7_2.0x_Union.txt	12017	NM_003383	VLDLR	7436	A8K0G2 B3KTK6 P98155 Q59HD7 Q5VVF5 Q5VVF8 Q8NAN7	22487667	NM_001018056
Sox7_2.0x_Union.txt	12017	NM_020987	ANK3	288	A8KA62 B1AQT0 B1AQT1 B1AQT2 B3KW60 B4DIL1 D6RBY7 D6RCB2 D6RF31 D6RFK6 D6RHY3 E7EMJ1 E9PE32 F5GXK0 F5H4S1 F8W854 H0Y3A4 H0Y3N0 H0Y8Z4 H0Y951 H0Y9E9 H0YA66 H0YAH5 H0YF76 H0YH59 Q12955 Q5CZH9 Q6ZT73 Q7Z3G4 Q8NAK2 Q9H0P5	22487690	NM_001149
Sox7_2.0x_Union.txt	12017	AI800709	ANK3	288	A8KA62 B1AQT0 B1AQT1 B1AQT2 B3KW60 B4DIL1 D6RBY7 D6RCB2 D6RF31 D6RFK6 D6RHY3 E7EMJ1 E9PE32 F5GXK0 F5H4S1 F8W854 H0Y3A4 H0Y3N0 H0Y8Z4 H0Y951 H0Y9E9 H0YA66 H0YAH5 H0YF76 H0YH59 Q12955 Q5CZH9 Q6ZT73 Q7Z3G4 Q8NAK2 Q9H0P5	22487691	NM_001149
Sox7_2.0x_Union.txt	12017	AI800709	ANK3	288	A8KA62 B1AQT0 B1AQT1 B1AQT2 B3KW60 B4DIL1 D6RBY7 D6RCB2 D6RF31 D6RFK6 D6RHY3 E7EMJ1 E9PE32 F5GXK0 F5H4S1 F8W854 H0Y3A4 H0Y3N0 H0Y8Z4 H0Y951 H0Y9E9 H0YA66 H0YAH5 H0YF76 H0YH59 Q12955 Q5CZH9 Q6ZT73 Q7Z3G4 Q8NAK2 Q9H0P5	22487692	NM_001149
Sox7_2.0x_Union.txt	12017	NM_053064	GNG2	54331	G3V2C9 G3V2N0 G3V2W5 G3V3J9 G3V415 P59768 Q9H373	22487734	NM_001243773
Sox7_2.0x_Union.txt	12017	BC005254	CLEC2B	9976	Q92478	22487788	NM_005127
Sox7_2.0x_Union.txt	12017	NM_005127	CLEC2B	9976	Q92478	22487789	NM_005127
Sox7_2.0x_Union.txt	12017	NM_032857	LACTB	114294	H0YNN5 P83111	22487873	NM_032857
Sox7_2.0x_Union.txt	12017	NM_004787	SLIT2	9353	B3KNE2 E9PCX4 F5H0U4 H0Y968 H0Y9Z6 H7BYF5 O94813	22487885	NM_004787
Sox7_2.0x_Union.txt	12017	NM_001008566	TPST2	8459	B7Z976 O60704	22487984	NM_001008566
Sox7_2.0x_Union.txt	12017	NM_001017395	TMCC1	23023	A8K5Y3 B4DE04 D6RBT7 D6RH19 E9PC87 O94876 Q6N039 Q8N4H2	22488071	NM_001017395
Sox7_2.0x_Union.txt	12017	NM_182679	GPATCH4	54865	A8KAG1 B4DVU2 E9PAV9 E9PPY4 F2Z3C6 F8W895 Q5T3I0	22488134	NM_015590
Sox7_2.0x_Union.txt	12017	BE794289	GPATCH4	54865	A8KAG1 B4DVU2 E9PAV9 E9PPY4 F2Z3C6 F8W895 Q5T3I0	22488135	NM_015590
Sox7_2.0x_Union.txt	12017	NM_001795	CDH5	1003	B4DTP0 B4DTR2 B4DU18 E7EPJ8 F5H6D9 H3BPG1 H3BQ82 H3BR11 H3BR64 I3L1J2 P33151 Q4VAI4 Q4VAI5 Q4VAI6 Q59EA3	22488137	NM_001114117
Sox7_2.0x_Union.txt	12017	NM_001546	ID4	3400	P47928	22488173	NM_001546
Sox7_2.0x_Union.txt	12017	Y07958	ID4	3400	P47928	22488174	NM_001546
Sox7_2.0x_Union.txt	12017	NM_138410	CMTM7	112616	H0YFU6 Q96FZ5	22488188	NM_138410
Sox7_2.0x_Union.txt	12017	NM_020859	SHROOM3	57619	B3KY47 B4E244 C9JK37 Q6ZVL3 Q8TF72 Q96K23	22488197	NM_020859
Sox7_2.0x_Union.txt	12017	AF109367	SHROOM3	57619	B3KY47 B4E244 C9JK37 Q6ZVL3 Q8TF72 Q96K23	22488198	NM_020859
Sox7_2.0x_Union.txt	12017	NM_017707	ASAP3	55616	B4DRP2 E9PH31 E9PS98 F5H0U0 H0YE36 H0YEB0 H0YER8 Q6PJ46 Q8TDY4 Q9NXH7	22488245	NM_001143778
Sox7_2.0x_Union.txt	12017	AK300431	IFIT2	3433	B4DTZ5 P09913 Q05DN2 Q8IZ03	22488359	NM_001547
Sox7_2.0x_Union.txt	12017	BC032839	IFIT2	3433	B4DTZ5 P09913 Q05DN2 Q8IZ03	22488360	NM_001547
Sox7_2.0x_Union.txt	12017	NM_181726	ANKRD37	353322	B4E066 Q7Z713	22488403	NM_181726
Sox7_2.0x_Union.txt	12017	NM_001005404	YPEL2	388403	Q96QA6	22488443	NM_001005404
Sox7_2.0x_Union.txt	12017	NM_001012994	SNX30	401548	H0Y496 Q5VWJ9	22488446	NM_001012994
Sox7_2.0x_Union.txt	12017	NM_198859	PRICKLE2	166336	C9JY03 H3BNU0 H3BRB9 Q7Z3G6	22488473	NM_198859
Sox7_2.0x_Union.txt	12017	NM_017554	PARP14	54625	E9PGX7 H7C4Y3 H7C5R8 Q460N5 Q8N546	22488483	NM_017554
Sox7_2.0x_Union.txt	12017	NM_007189	ABCF2	10061	C9JHK9 C9JZV3 O95324 Q75MJ0 Q9UG63	22488511	NM_005692
Sox7_2.0x_Union.txt	12017	NM_015993	PLLP	51090	A8K0N4 H3BN27 Q9Y342	22488538	NM_015993
Sox7_2.0x_Union.txt	12017	NM_017596	KIF21B	23046	B2RP62 B7ZMI0 H0YED0 O75037 Q2UVF0 Q9NTB9	22488581	NM_001252100
Sox7_2.0x_Union.txt	12017	AI719730	GUCY1A3	2982	B3KU69 D6RDW3 D6RF78 Q02108 Q6PJR4	22488624	NM_000856
Sox7_2.0x_Union.txt	12017	BC098343	PDP1	54704	B3KPZ7 B4DYX8 E5RFL8 E5RHB9 E5RI96 E5RIE5 E5RIV4 Q6P1N1 Q9P0J1	22488716	NM_001161778
Sox7_2.0x_Union.txt	12017	NM_018444	PDP1	54704	B3KPZ7 B4DYX8 E5RFL8 E5RHB9 E5RI96 E5RIE5 E5RIV4 Q6P1N1 Q9P0J1	22488717	NM_001161778
Sox7_2.0x_Union.txt	12017	NM_020665	TMEM27	57393	Q9HBJ8	22488730	NM_020665
Sox7_2.0x_Union.txt	12017	NM_002729	HHEX	3087	B1AQ17 F8VU08 Q03014	22488807	NM_002729
Sox7_2.0x_Union.txt	12017	NM_004726	REPS2	9185	B4DQQ8 E9PFM4 Q59H22 Q8NFH8	22488834	NM_001080975
Sox7_2.0x_Union.txt	12017	NM_001343	DAB2	1601	B2RAW0 B4DNN1 D6REB1 D6RFF7 D6RGZ1 D6RIA5 P98082	22488841	NM_001244871
Sox7_2.0x_Union.txt	12017	BC003064	DAB2	1601	B2RAW0 B4DNN1 D6REB1 D6RFF7 D6RGZ1 D6RIA5 P98082	22488842	NM_001244871
Sox7_2.0x_Union.txt	12017	NM_024111	CHAC1	79094	Q9BUX1	22488893	NM_001142776
Sox7_2.0x_Union.txt	12017	NM_018357	LARP6	55323	H0YMC6 Q9BRS8	22488903	NM_018357
Sox7_2.0x_Union.txt	12017	NM_002214	ITGB8	3696	B4DHD4 P26012 Q9BUG9	22488989	NM_002214
Sox7_2.0x_Union.txt	12017	NM_001114086	CLIC5	53405	B2RAZ0 Q49AE1 Q53G01 Q7Z2R8 Q8N675 Q8NBY3 Q9NZA1	22488993	NM_001114086
Sox7_2.0x_Union.txt	12017	NM_002114	HIVEP1	3096	B4DFZ7 C9J2N3 C9JAW2 C9JLG1 C9JZF8 C9JZV1 F5H212 H0YGA5 H7BYU7 P15822 Q82133	22489033	NM_002114
Sox7_2.0x_Union.txt	12017	NM_002114	HIVEP1	3096	B4DFZ7 C9J2N3 C9JAW2 C9JLG1 C9JZF8 C9JZV1 F5H212 H0YGA5 H7BYU7 P15822 Q82133	22489034	NM_002114
Sox7_2.0x_Union.txt	12017	D16217	CAST	831	A8K8C4 B2RCJ7 B2RDU1 B7Z468 B7Z4U9 B7Z574 B7Z5T6 B7Z5T9 B7Z6N0 B7Z7L4 B7Z8S8 B7Z8U1 D6RAA8 D6RBR1 D6RBZ8 D6RC54 D6RGF7 E7EN75 E7EQ12 E7EQA0 E7EQK6 E7ES10 E7ESM9 E7EVY3 E9PCH5 E9PDE4 E9PSG1 F8W7E0 G5E946 G5E9D3 H0Y7F0 H0Y944 H0Y9H6 H0YA91 H0YD33 P20810 Q15786 Q59HE3 Q6AZE3 Q86YM9 Q9Y2M4	22489070	NM_001042440
Sox7_2.0x_Union.txt	12017	M90360	AKAP13	11214	A8MYJ1 B0AZU4 B7ZW05 E7EWV9 F5H8M3 H0Y4V5 H0YK18 H0YK84 H0YLH1 H0YMI5 H0YMW2 H7BYL5 Q12802	22489081	NM_006738
Sox7_2.0x_Union.txt	12017	NM_004289	NFE2L3	9603	F5H2U6 Q96BQ9 Q9UHQ8 Q9Y4A8	22489147	NM_004289
Sox7_2.0x_Union.txt	12017	NM_182915	STEAP3	55240	B8ZZX6 Q658P3 Q9H7Y1	22489164	NM_001008410
Sox7_2.0x_Union.txt	12017	NM_001127671	LIFR	3977	A8K1Z4 D6RF33 D6RJ94 H0YAF2 P42702	22489171	NM_001127671
Sox7_2.0x_Union.txt	12017	NM_032047	B3GNT5 /// LOC100505668	100505668	B3KRF8 C9IYY0 C9J368 C9J5K2 Q9BYG0	22489191	NM_032047
Sox7_2.0x_Union.txt	12017	NM_001165	BIRC3	330	H0YCJ5 H0YEZ0 Q13489	22489336	NM_001165
Sox7_2.0x_Union.txt	12017	U54711	BIRC3	330	H0YCJ5 H0YEZ0 Q13489	22489338	NM_001165
Sox7_2.0x_Union.txt	12017	NM_006800	MSL3	10943	A6NCU2 A6NHW8 A6NLU8 A8K165 B4E2T7 B7Z227 C9JKR8 C9JXM9 F8WC61 H7BYE4 H7C522 Q8N5Y2	22489360	NM_001193270
Sox7_2.0x_Union.txt	12017	NM_175085	GART	2618	B4DJ93 C9JBJ1 C9JKQ7 C9JTV6 C9JZG2 F8WD69 H7C366 H7C489 H7C5I9 O14660 P22102 Q15374 Q3B7A7 Q59HH3	22489416	NM_000819
Sox7_2.0x_Union.txt	12017	NM_005589	ALDH6A1	4329	B4DFS8 G3V4Z4 O43573 Q02252 Q53FN8 Q53H94	22489484	NM_005589
Sox7_2.0x_Union.txt	12017	AY082381	NOV	4856	B4DFW1 P48745	22489519	NM_002514
Sox7_2.0x_Union.txt	12017	NM_006398	GABBR1 /// UBD	10537	B0UXY8 B2R4Q8 C9J342 C9JBK4 C9JZG6 F8WAS6 F8WAV2 F8WDC0 F8WF38 H7C4Z2 O15205 Q53EM0 Q59HG8 Q5RJ89 Q5SUJ9 Q71SG6 Q8IW08 Q9UBS5	22489555	NM_001470
Sox7_2.0x_Union.txt	12017	NM_004398	DDX10	1662	B4DKX3 E7EUR6 E9PIF2 Q13206 Q59EC7 Q86VR6	22489587	NM_004398
Sox7_2.0x_Union.txt	12017	NM_001017995	SH3PXD2B	285590	A1X283 G3V144 H0YAU1 Q9NWI5	22489609	NM_001017995
Sox7_2.0x_Union.txt	12017	NM_017563	IL17RD	54756	B4DXM5 C9J6R0 Q8NFM7	22489659	NM_017563
Sox7_2.0x_Union.txt	12017	NM_025074	FRAS1	80144	A2RRR8 A2RRR9 D6RCP6 E7EWM9 E9PHH6 F5H8F4 H0Y8V2 H0Y930 H0Y9A6 H0Y9C9 H0YFN5 Q05CW8 Q69YV4 Q6AI26 Q86XX4	22489663	NM_001166133
Sox7_2.0x_Union.txt	12017	BC020921	ITSN2	50618	A6H8W8 C9JP63 E7EPJ2 F8W719 H7BZD4 H7C0L8 H7C3E2 Q6PJ79 Q8IWI5 Q9NZM3	22489666	NM_006277
Sox7_2.0x_Union.txt	12017	BQ025327	CNOT6L	246175	B4E0K8 B4E2S0 D6RGK9 D6RIW9 H0Y9C1 H0Y9Z5 H0YA76 Q96LI5	22489668	NM_144571
Sox7_2.0x_Union.txt	12017	BQ025327	CNOT6L	246175	B4E0K8 B4E2S0 D6RGK9 D6RIW9 H0Y9C1 H0Y9Z5 H0YA76 Q96LI5	22489669	NM_144571
Sox7_2.0x_Union.txt	12017	BQ025327	CNOT6L	246175	B4E0K8 B4E2S0 D6RGK9 D6RIW9 H0Y9C1 H0Y9Z5 H0YA76 Q96LI5	22489670	NM_144571
Sox7_2.0x_Union.txt	12017	AB062112	HLA-DRB1 /// HLA-DRB3 /// HLA-DRB4 /// HLA-DRB5 /// LOC100507709 /// LOC100507714	100507709	A8K2X3 A8K634 B6E315 B7ZW57 D0EV56 D7RIG0 D7RIG2 D7RIG5 D7RIG6 D7RIG7 D7RIH0 D7RIH2 D7RIH3 D7RIH4 D7RIH5 D7RIH6 D7RIH8 D7RIH9 D7RII0 E1ACV6 E8ZWG7 E9L5Q4 F8VX19 F8VZH6 F8VZR1 O02951 O19190 O19507 O19517 O19586 O19587 O19622 O19719 O19721 O19725 O19727 O19728 O19730 O19740 O19742 O19743 O19762 O19763 O77961 O77966 O78	22489680	NM_001243965
Sox7_2.0x_Union.txt	12017	NM_019053	EXOC6	54536	A5YP36 B1AP46 B2RDH5 B3KXY5 B4DEZ1 B7Z6G5 E7EW84 E9PHI3 F2Z2Q3 F2Z3K0 H0Y5J8 Q8TAG9 Q9NTA6 Q9NUN4	22489707	NM_001013848
Sox7_2.0x_Union.txt	12017	AK055922	CDK6	1021	A4D1G0 Q00534	22489727	NM_001145306
Sox7_2.0x_Union.txt	12017	NM_001127662	GSN	2934	B7Z2X4 B7Z4U6 B7Z5V1 B7Z6N2 B7Z992 B7Z9A0 F5H1A8 F5H8M4 F8WA45 P06396 Q5T0H7 Q5T0H8 Q5T0I2 Q9NRJ2	22489815	NM_000177
Sox7_2.0x_Union.txt	12017	NM_020927	VAT1L	57687	A8K288 Q8NDE0 Q9HCJ6	22489818	NM_020927
Sox7_2.0x_Union.txt	12017	NM_012434	SLC17A5	26503	B2RE38 B4DFF2 Q9NRA2	22489962	NM_012434
Sox7_2.0x_Union.txt	12017	NM_012434	SLC17A5	26503	B2RE38 B4DFF2 Q9NRA2	22489963	NM_012434
Sox7_2.0x_Union.txt	12017	NM_001102426	TBC1D8	11138	B7Z6L4 O95759	22490011	NM_001102426
Sox7_2.0x_Union.txt	12017	NM_006207	PDGFRL	5157	Q15198	22490021	NM_006207
Sox7_2.0x_Union.txt	12017	BF434088	PLD1	5337	C9IY79 F8WBV7 H7C0L3 Q13393 Q59EA4	22490032	NM_001130081
Sox7_2.0x_Union.txt	12017	NM_198315	VWA5A	4013	A8K6N3 B2RC43 B4DHS6 G3V152 O00534	22490049	NM_001130142
Sox7_2.0x_Union.txt	12017	AI962897	SEMA3C	10512	B4DRL8 B4E2I9 F2Z2Y0 F5H1Z7 F8WEP9 Q99985	22490153	NM_006379
Sox7_2.0x_Union.txt	12017	BU630314	SLAIN2	57606	D6REM5 D6RIF6 H0Y9L2 Q9H705 Q9P270	22490208	NM_020846
Sox7_2.0x_Union.txt	12017	NM_014689	DOCK10	55619	B3FL70 B4DEY4 B4DF07 E7EV00 F8WB48 F8WE73 H0YFC5 H7BZ07 H7C0I3 Q3LIC8 Q4W4X9 Q68DA4 Q96BY6	22490349	NM_014689
Sox7_2.0x_Union.txt	12017	NM_007257	PNMA2	10687	Q5U5Z3 Q9UL42	22490414	NM_007257
Sox7_2.0x_Union.txt	12017	NM_001010000	ARHGAP28	79822	A8K176 B4DXL2 E9PL26 E9PMX7 E9PRP2 F6VKJ9 H9KVB7 Q9P2N2	22490467	NM_001010000
Sox7_2.0x_Union.txt	12017	AK292167	PTGS2	5743	D9MWI3 P35354 Q6ZYK7 Q8IZA9	22490522	NM_000963
Sox7_2.0x_Union.txt	12017	NM_000963	PTGS2	5743	D9MWI3 P35354 Q6ZYK7 Q8IZA9	22490523	NM_000963
Sox7_2.0x_Union.txt	12017	BC013734	PTGS2	5743	D9MWI3 P35354 Q6ZYK7 Q8IZA9	22490524	NM_000963
Sox7_2.0x_Union.txt	12017	NM_021255	PELI2	57161	H0YK56 H0YNF4 Q659D8 Q9H716 Q9HAT8	22490554	NM_021255
Sox7_2.0x_Union.txt	12017	NM_002600	PDE4B	5142	A5YW33 B4DG71 E9PJ03 E9PMG3 E9PNB0 E9PR34 H0YCV7 Q07343 Q13944 Q13945 Q59GM8 Q5TEK4 Q5TEK5 Q5TEK6 Q68CX5	22490581	NM_001037339
Sox7_2.0x_Union.txt	12017	NM_015345	DAAM2	23500	F2Z2Q2 G5EA45 Q6DCB0 Q86T65	22490664	NM_001201427
Sox7_2.0x_Union.txt	12017	BC029044	STC1	6781	B2R6I6 B4DN22 P52823	22490682	NM_003155
Sox7_2.0x_Union.txt	12017	NM_003155	STC1	6781	B2R6I6 B4DN22 P52823	22490683	NM_003155
Sox7_2.0x_Union.txt	12017	U46768	STC1	6781	B2R6I6 B4DN22 P52823	22490684	NM_003155
Sox7_2.0x_Union.txt	12017	BM996339	TCF4	6925	B3KT62 B3KUC0 B3KVA4 B4DUG3 B7Z5M6 B7Z6Y1 E9PH57 G0LNT1 G0LNT2 G0LNT4 G0LNT6 G0LNT7 G0LNT8 G0LNT9 G0LNU0 G0LNU1 G0LNU2 G0LNU4 G0LNU5 G0LNU8 G0LNU9 G0LNV0 G0LNV1 G0LNV2 H3BMC8 H3BME8 H3BML7 H3BNI2 H3BNZ2 H3BP59 H3BPG3 H3BPJ7 H3BPQ1 H3BRF7 H3BSX3 H3BT24 H3BT95 H3BTC3 H3BTM9 H3BTP3 H3BTZ0 H3BUQ3 H3BVH6 P15884 Q59ES0	22490725	NM_001083962
Sox7_2.0x_Union.txt	12017	NM_001145855	SH3BP2	6452	D6R919 D6R995 D6RAB4 D6RBL6 D6RC64 D6RER9 H0YAD9 P78314 Q6ZVU3	22490798	NM_001122681
Sox7_2.0x_Union.txt	12017	NM_001037132	NRCAM	4897	B3KRX0 B4DFP9 B7Z670 C9J8B6 C9JF43 C9JH43 C9JUR7 C9JYY6 E9PDA4 E9PF33 F5GYD3 F8W774 F8W775 H7C132 Q14BM2 Q14CA1 Q4KMQ7 Q6QRP2 Q92823	22490823	NM_001037132
Sox7_2.0x_Union.txt	12017	NM_022168	IFIH1	64135	A8KA76 Q9BYX4	22490832	NM_022168
Sox7_2.0x_Union.txt	12017	BU677067	PDE4D	5144	D6R9L4 D6RAQ0 D6RBB2 D6RHE0 D6RIG1 F8W993 O43862 Q08499 Q9HCX6 Q9HCX8	22490932	NM_001104631
Sox7_2.0x_Union.txt	12017	NM_015221	DNMBP	23268	A8MU01 B3KY33 B4E0Q3 F5H5N8 Q5SVK8 Q5SVK9 Q6XZF7	22490934	NM_015221
Sox7_2.0x_Union.txt	12017	BM971589	MTUS1	57509	B4DH03 B4E246 H0YC63 Q9ULD2	22490962	NM_001001924
Sox7_2.0x_Union.txt	12017	NM_005438	FOSL1	8061	B2R9B4 B4DDQ7 B4DR11 E9PKL5 E9PPX2 E9PQT6 P15407 Q53GM9	22490963	NM_005438
Sox7_2.0x_Union.txt	12017	NM_005438	FOSL1	8061	B2R9B4 B4DDQ7 B4DR11 E9PKL5 E9PPX2 E9PQT6 P15407 Q53GM9	22490964	NM_005438
Sox7_2.0x_Union.txt	12017	NM_005438	FOSL1	8061	B2R9B4 B4DDQ7 B4DR11 E9PKL5 E9PPX2 E9PQT6 P15407 Q53GM9	22490965	NM_005438
Sox7_2.0x_Union.txt	12017	NM_004772	NREP	9315	D6R982 D6R9Y7 D6REJ5 D6RIC9 Q16612 Q9P187	22490967	NM_001142474
Sox7_2.0x_Union.txt	12017	NM_019034	RHOF	54509	A8K0B7 F5GXB1 Q9HBH0	22491048	NM_019034
Sox7_2.0x_Union.txt	12017	NM_003242	TGFBR2	7048	A3QNQ0 B4E2S6 D2JYI1 P37173 Q6A176	22491168	NM_001024847
Sox7_2.0x_Union.txt	12017	CX163686	EIF5	1983	B4DEN3 H0YK11 H0YK29 H0YLZ1 H0YM54 H0YMJ8 H0YN40 P55010 Q05DF3 Q32Q19 Q6IBU0	22491212	NM_001969
Sox7_2.0x_Union.txt	12017	BC059360	PGM2L1	283209	F5GWK0 Q6PCE3	22491262	NM_173582
Sox7_2.0x_Union.txt	12017	BX489279	CBL	867	P22681	22491295	NM_005188
Sox7_2.0x_Union.txt	12017	NM_003954	MAP3K14	9020	H7BYC1 Q68D39 Q6ZMZ1 Q99558	22491388	NM_003954
Sox7_2.0x_Union.txt	12017	NM_004411	DYNC1I1	1780	A4D1I7 B4DME3 C9J3E7 E5RFE1 E5RJ75 F5H050 G5E9K1 O14576 Q7Z6M0 Q8IY52 Q8N542 Q8TBF7	22491394	NM_001135556
Sox7_2.0x_Union.txt	12017	NM_017650	PPP1R9A	55607	A1L494 B2RWQ1 B7ZLX4 E9PCK6 E9PDX1 F8W7J9 Q9ULJ8	22491409	NM_001166160
Sox7_2.0x_Union.txt	12017	BC032100	DNAJA3	9093	B3KM81 B4DI33 Q53G26 Q59E88 Q96EY1	22518669	NM_001135110
Sox7_2.0x_Union.txt	12017	AK303632	SLFN5	162394	B4E0B1 B4E128 Q08AF3	22518710	NM_144975
Sox7_2.0x_Union.txt	12017	AK296851	LAMB3	3914	B4DL55 Q13751 Q5THA1	22518788	NM_000228
Sox7_2.0x_Union.txt	12017	AK302550	ITGAV	3685	A5YM53 B4DYQ7 B7Z883 B7ZLX0 E7EWZ6 H7BZG1 P06756	22518819	NM_001144999
Sox7_2.0x_Union.txt	12017	AK297005	S1PR1	1901	B4DLH9 P21453	22518868	NM_001400
Sox7_2.0x_Union.txt	12017	AK301956	ODC1	4953	B4DXF8 C9JG30 F5H574 P11926 Q2F835 Q53TU3	22519001	NM_002539
Sox7_2.0x_Union.txt	12017	AK301203	TXNIP	10628	B4DVM7 B4DVR8 B4E3D3 F6RIS4 Q9H3M7	22519251	NM_006472
Sox7_2.0x_Union.txt	12017	AK304725	TACC1	6867	B4DH49 B4DHF7 B4E0Z9 B4E302 B4E3H6 B4E3L7 B7Z3G3 E7ET87 E7EVI4 G8JLK4 H0YAY0 H0YBT8 O75410 Q5HYH0 Q8IUJ5	22519278	NM_001122824
Sox7_2.0x_Union.txt	12017	AB240567	CD55	1604	B1AP13 B1AP15 B2R658 B4DPY4 B4DUF2 E9PSH2 F5H2H0 H3BLV0 H7BY55 P08174 Q14UF2 Q14UF3 Q14UF4 Q14UF5 Q14UF6 Q8TD11 Q8TD12 Q8TD13 Q8TD14	22519318	NM_000574
Sox7_2.0x_Union.txt	12017	BC094715	CEBPD	1052	P49716 Q504X4	22519355	NM_005195
Sox7_2.0x_Union.txt	12017	BC030517	FAM134B	54463	H0Y9U4 Q9H6L5	22519665	NM_001034850
Sox7_2.0x_Union.txt	12017	AK294068	SLC17A5	26503	B2RE38 B4DFF2 Q9NRA2	22519677	NM_012434
Sox7_2.0x_Union.txt	12017	AK299731	RND3	390	B2R838 B4DNQ0 B4DSG7 E9PFH1 P61587 Q53RZ3 Q6FGN7 Q6FGR9	22519913	NM_001254738
Sox7_2.0x_Union.txt	12017	BC009615	OTUB2	78990	Q8WYS4 Q96DC9 Q9BWI9	22519974	NM_023112
Sox7_2.0x_Union.txt	12017	AY303779	PNRC1	10957	Q12796 Q49A59 Q7Z5N0 Q9BXV2	22520000	NM_006813
Sox7_2.0x_Union.txt	12017	D13889	ID1	3397	P41134	22520147	NM_002165
Sox7_2.0x_Union.txt	12017	CR749817	SEL1L3	23231	B4DTH5 D6RCE1 D6RDH1 D6RF11 H0Y8P8 H0Y9M6 H0YA36 Q68CR1	22520401	NM_015187
Sox7_2.0x_Union.txt	12017	AK302533	CBLB	868	A8K9S7 B3KSS7 B3KVR2 B4DYP3 B4DZF4 B5MC15 B7ZAG1 B8K284 C9JRB3 C9JU85 E7ENW2 E9PHA9 F5H4J9 Q13191 Q68CY2	22520472	NM_170662
Sox7_2.0x_Union.txt	12017	BC004205	SPRY2	10253	B2R9J9 F5GXL0 O43597 Q7Z783	22520474	NM_005842
Sox7_2.0x_Union.txt	12017	BT007067	IL8	3576	C9J4T6 P10145	22520512	NM_000584
Sox7_2.0x_Union.txt	12017	CR542179	G0S2	50486	P27469	22520560	NM_015714
Sox7_2.0x_Union.txt	12017	BT006880	CXCL1	2919	P09341	22520600	NM_001511
Sox7_2.0x_Union.txt	12017	AY237723	IL24	11009	E7ER64 E9PMT7 E9PN59 E9PPV1 E9PQG1 O60667 Q13007 Q2YHE6	22520662	NM_001185156
Sox7_2.0x_Union.txt	12017	BU615833	LINC00341	79686	Q9H761	22520684	NM_024633
Sox7_2.0x_Union.txt	12017	AB014551	ARHGEF2	9181	B4DJ49 B7Z977 F5H3H5 Q5VY93 Q92974	22520777	NM_001162383
Sox7_2.0x_Union.txt	12017	CR620856	FAM107B	83641	C9J3Q3 C9J6N5 C9J6Y8 C9JP05 C9JQ40 C9JW51 C9JYP1 F8WCJ2 F8WDH7 Q9H098	22520781	NM_031453
Sox7_2.0x_Union.txt	12017	BX537388	PIK3R3	8503	B4DXM8 B4E3G5 E7EMU8 F6TDL0 Q05DQ0 Q5T4P3 Q68CY7 Q7Z3W2 Q8N381 Q92569 Q9UMI3	22520802	NM_001114172
Sox7_2.0x_Union.txt	12017	BM989371	SSH1	54434	F8VS18 F8W1D9 F8W9J7 H0YHR3 Q8WYL5	22520804	NM_001161330
Sox7_2.0x_Union.txt	12017	AL563781	NDRG1	10397	B3KR80 B3KU62 B3KWB2 B7Z446 B7Z4H0 B7Z505 B7Z5Z7 E5RG99 E5RGG6 E5RGM5 E5RH82 E5RI76 E5RIM2 E5RIR1 E5RIV1 E5RJ98 E5RJY1 E5RK17 E7ESM1 E9PDL6 F5H654 Q53EU7 Q597H1 Q8N959 Q92597	22520823	NM_001135242
Sox7_2.0x_Union.txt	12017	AW299767	CALB1	793	B7Z380 B7Z9J4 E5RG14 E5RIZ8 P05937	22520958	NM_004929
Sox7_2.0x_Union.txt	12017	BU633177	CCBE1	147372	Q6UXH8	22521049	NM_133459
Sox7_2.0x_Union.txt	12017	AK056699	FYN	2534	B3KPS6 H0UI48 P06241 Q5R3A8	22521073	NM_001242779
Sox7_2.0x_Union.txt	12017	AK025078	SLC26A2	1836	C9JAN6 H0YA38 P50443 Q7Z4B6 Q7Z4C0	22521080	NM_000112
Sox7_2.0x_Union.txt	12017	BX640696	SLC26A2	1836	C9JAN6 H0YA38 P50443 Q7Z4B6 Q7Z4C0	22521081	NM_000112
Sox7_2.0x_Union.txt	12017	AK075463	SPP1	6696	A6XMV6 B7Z351 C4B6Q2 C9JXD2 D6R9C5 F2YBS4 F2YBS5 F2YQ21 P10451 Q3LGB0	22521090	NM_000582
Sox7_2.0x_Union.txt	12017	AK093013	MLKL	197259	I3L2T9 I3L2U3 I3L4A6 I3L4Z5 Q5JPC5 Q8NB16	22521116	NM_001142497
Sox7_2.0x_Union.txt	12017	AK129873	ADAMTS1	9510	B2RB33 E5RI60 E5RJR7 H7C206 Q5HYL0 Q6ZP79 Q8NE26 Q9UHI8	22521148	NM_006988
Sox7_2.0x_Union.txt	12017	AK098525	HHIP	64399	A8K734 Q96QV1	22521192	NM_022475
Sox7_2.0x_Union.txt	12017	BC036476	STK31	56164	A8K8V9 B3KY91 B4DZ06 C9JPB1 C9JQW5 E9PRQ0 F8W6E7 Q96MA3 Q9BXU1	22521201	NM_001122833
Sox7_2.0x_Union.txt	12017	AK056614	RRP12	23223	B3KMR5 B3KPQ2 B3KY97 B4DK00 E9PCK7 F5H456 Q5JTH9	22521279	NM_001145114
Sox7_2.0x_Union.txt	12017	AW780256	CADPS2	93664	B3KNS2 B3KX29 B7ZM57 C9IYE1 E7EMZ7 F5H4L3 F8W8P5 F8WDX1 H0Y8B5 Q86UW7	22521292	NM_001009571
Sox7_2.0x_Union.txt	12017	AK095159	SDR16C5	195814	B3KT84 F5GYT6 G3V145 Q8N3Y7	22521365	NM_138969
Sox7_2.0x_Union.txt	12017	AK095492	HMGCS1	3157	Q01581 Q5XJ04 Q8N995	22521404	NM_001098272
Sox7_2.0x_Union.txt	12017	AK001160	MANSC1	54682	B4DQ82 F5H3M3 F5H6G8 Q9H8J5 Q9NW60	22521459	NM_018050
Sox7_2.0x_Union.txt	12017	CF132350	PXDN	7837	C9J4I9 H7C1W1 H7C300 H7C3W2 Q92626 Q96GF5	22521479	NM_012293
Sox7_2.0x_Union.txt	12017	BC018686	USP25	29761	Q96B65 Q9HA22 Q9UHP3	22521537	NM_013396
Sox7_2.0x_Union.txt	12017	AL833232	HMCN1	83872	Q5TCP6 Q69YJ3 Q96K89 Q96RW7	22521557	NM_031935
Sox7_2.0x_Union.txt	12017	CN256363	ZNF643	65243	B3KRI0 D3DPV3 E7EN37 E9PS66 Q9UJL9	22521563	NM_023070
Sox7_2.0x_Union.txt	12017	BI041372	DAAM1	23002	A8K6X5 B3KMP4 G3V275 Q9Y4D1	22521566	NM_014992
Sox7_2.0x_Union.txt	12017	U88576	CD55	1604	B1AP13 B1AP15 B2R658 B4DPY4 B4DUF2 E9PSH2 F5H2H0 H3BLV0 H7BY55 P08174 Q14UF2 Q14UF3 Q14UF4 Q14UF5 Q14UF6 Q8TD11 Q8TD12 Q8TD13 Q8TD14	22521570	NM_000574
Sox7_2.0x_Union.txt	12017	AK126745	LRIG1	26018	H7BYG3 Q5XWD3 Q96JA1	22521596	NM_015541
Sox7_2.0x_Union.txt	12017	BX640607	STAT2	6773	A0JLQ9 B4DHE0 B4DHI1 B4DLC7 B4DLC8 G3V268 G3V2M6 G3V319 P52630 Q6N0A7	22521633	NM_005419
Sox7_2.0x_Union.txt	12017	AB040955	KIAA1522	57648	Q9P206	22521699	NM_001198972
Sox7_2.0x_Union.txt	12017	BX641017	JHDM1D	80853	A0JNV9 H9KVD6 Q6ZMT4	22521709	NM_030647
Sox7_2.0x_Union.txt	12017	CF125206	LOC100652886 /// LOC100653157 /// TGFBI	100652886	B9ZVW9 D6RBX4 D6RHG5 G8JLA8 H0Y8L3 H0Y8M8 H0Y9D7 H0YAB8 H0YAH8 Q15582 Q53GU8	22521767	NM_000358
Sox7_2.0x_Union.txt	12017	BC144612	TMEM189 /// TMEM189-UBE2V1	387521	A5PLL7 F8WBY2 Q5TGE1 Q5TGE2	22521794	NM_001162505
Sox7_2.0x_Union.txt	12017	BC041464	LOC154761	154761	B4DLR7	22521813	NR_015421
Sox7_2.0x_Union.txt	12017	AK126854	KDM4B	23030	B3KX69 B7ZM63 F5GX28 O94953 Q8NF74	22521906	NM_015015
Sox7_2.0x_Union.txt	12017	AL117587	ZNF608	57507	A2RRB2 B3KPE6 Q9UFL4 Q9ULD9	22521936	NM_020747
Sox7_2.0x_Union.txt	12017	AK002113	EXOC6	54536	A5YP36 B1AP46 B2RDH5 B3KXY5 B4DEZ1 B7Z6G5 E7EW84 E9PHI3 F2Z2Q3 F2Z3K0 H0Y5J8 Q8TAG9 Q9NTA6 Q9NUN4	22521979	NM_001013848
Sox7_2.0x_Union.txt	12017	CA778103	CERS6	253782	Q32M63 Q6ZMG9	22522006	NM_001256126
Sox7_2.0x_Union.txt	12017	BC007490	LPXN	9404	B4DVI1 B7Z5P7 E9PNX9 O60711	22522008	NM_001143995
Sox7_2.0x_Union.txt	12017	AK225216	FERMT1	55612	B2RAX1 F8W9F0 G3V1L6 Q49AC8 Q54A15 Q5JWV4 Q9BQL6	22522099	NM_017671
Sox7_2.0x_Union.txt	12017	AK130092	LARP6	55323	H0YMC6 Q9BRS8	22522195	NM_018357
Sox7_2.0x_Union.txt	12017	BX379768	SPP1	6696	A6XMV6 B7Z351 C4B6Q2 C9JXD2 D6R9C5 F2YBS4 F2YBS5 F2YQ21 P10451 Q3LGB0	22522216	NM_000582
Sox7_2.0x_Union.txt	12017	AY500353	VEGFA	7422	A2A2V4 H0Y407 H0Y414 H0Y462 H0Y8N2 H3BLW8 P15692 Q6WZM0 Q96FD9	22522231	NM_001025366
Sox7_2.0x_Union.txt	12017	AL833262	SYNM	23336	C9JIE4 H0YL34 O15061	22522243	NM_015286
Sox7_2.0x_Union.txt	12017	BC144510	TMEM2	23670	B3KNL9 B4DTX3 B4E1B9 F5GZC1 F5H6B2 H3BLX9 H3BLY0 Q9UHN6	22522248	NM_001135820
Sox7_2.0x_Union.txt	12017	BX648278	FOXO1	2308	F8TAD1 Q12778	22522258	NM_002015
Sox7_2.0x_Union.txt	12017	AB208816	CAST	831	A8K8C4 B2RCJ7 B2RDU1 B7Z468 B7Z4U9 B7Z574 B7Z5T6 B7Z5T9 B7Z6N0 B7Z7L4 B7Z8S8 B7Z8U1 D6RAA8 D6RBR1 D6RBZ8 D6RC54 D6RGF7 E7EN75 E7EQ12 E7EQA0 E7EQK6 E7ES10 E7ESM9 E7EVY3 E9PCH5 E9PDE4 E9PSG1 F8W7E0 G5E946 G5E9D3 H0Y7F0 H0Y944 H0Y9H6 H0YA91 H0YD33 P20810 Q15786 Q59HE3 Q6AZE3 Q86YM9 Q9Y2M4	22522320	NM_001042440
Sox7_2.0x_Union.txt	12017	AK090570	ARHGEF5	7984	B3KQX6 B9EGR7 C9J591 H0Y895 Q12774 Q68E09	22522323	NM_001002861
Sox7_2.0x_Union.txt	12017	Y12395	IFRD2	7866	B3KQD7 F8WEI6 H7C2Z4 H7C444 Q12894 Q5TZV8 Q9UJ88	22522362	NM_006764
Sox7_2.0x_Union.txt	12017	AK098450	MMP1	4312	A5GZ69 B4DN15 B4DW26 P03956 Q53FK3 Q53G75 Q53G95 Q53G96 Q53G97 Q5TZP0 Q96DZ4	22522414	NM_001145938
Sox7_2.0x_Union.txt	12017	AK024645	HHIP	64399	A8K734 Q96QV1	22522493	NM_022475
Sox7_2.0x_Union.txt	12017	AU158582	ARHGEF37	389337	A1IGU5 B4DTT4 B4DUA3 D6RJH4	22522564	NM_001001669
Sox7_2.0x_Union.txt	12017	AK123579	BMPR2	659	A8K8R5 Q13873 Q597H5	22522591	NM_001204
Sox7_2.0x_Union.txt	12017	BF185501	SCD	6319	O00767 Q59GX7	22522660	NM_005063
Sox7_2.0x_Union.txt	12017	CA307233	SNX9	51429	B2RAU5 B3KXH8 Q59ES5 Q7Z4B8 Q9Y5X1	22522694	NM_016224
Sox7_2.0x_Union.txt	12017	CR620402	TXNIP	10628	B4DVM7 B4DVR8 B4E3D3 F6RIS4 Q9H3M7	22522917	NM_006472
Sox7_2.0x_Union.txt	12017	AK311312	RND3	390	B2R838 B4DNQ0 B4DSG7 E9PFH1 P61587 Q53RZ3 Q6FGN7 Q6FGR9	22522951	NM_001254738
Sox7_2.0x_Union.txt	12017	CR620887	RASSF2	9770	P50749 Q8IZA5	22523052	NM_014737
Sox7_2.0x_Union.txt	12017	AK309579	IRF2BP2	359948	B4DSJ2 B4DTU9 Q7Z5L9	22523132	NM_001077397
Sox7_2.0x_Union.txt	12017	DQ655917	FGF1	2246	A8K147 B5MCF4 C9JDC5 C9JUP6 P05230 Q16089 Q9UBK1	22523139	NM_000800
Sox7_2.0x_Union.txt	12017	CR625782	ISG20	3669	H0YMM4 H3BLY5 Q59F22 Q96AZ6	22523292	NM_002201
Sox7_2.0x_Union.txt	12017	AK308688	IFIT1	3434	B3KS50 D3DR31 P09914 Q5T7J1	22523306	NM_001548
Sox7_2.0x_Union.txt	12017	CR626841	RTN1	6252	A8K3B9 A8MT72 B7Z4K5 Q16799 Q2L7A7 Q2NKQ5 Q6IAX4	22523313	NM_001243115
Sox7_2.0x_Union.txt	12017	AF138863	ZC3HAV1	56829	A8K9U6 C9J6P4 F5H1W0 H7C5K1 Q05DV5 Q7Z2W4	22523325	NM_020119
Sox7_2.0x_Union.txt	12017	AY927612	LOC100127888	100127888	Q8TB00	22523532	NR_024470
Sox7_2.0x_Union.txt	12017	CR623979	ATF4	468	B4DJD4 P18848 Q6ICP0 Q96AQ3	22523533	NM_001675
Sox7_2.0x_Union.txt	12017	XR_015662	SVIL	6840	B4DXQ4 B4E3H1 B4E3N7 F5GXV0 F5GY75 F5H2Q5 O95425 Q569J5 Q63HL8 Q659E9	22523592	NM_003174
Sox7_2.0x_Union.txt	12017	NR_003704	MIR3651 /// SNORA84	100124534		22523632	NR_003704
Sox7_2.0x_Union.txt	12017	BU618641	SERPINE1	5054	B7Z1D9 B7Z4S0 B7Z4X6 B7ZAB0 C9J272 F8WD53 P05121	22523798	NM_000602
Sox7_2.0x_Union.txt	12017	BI670250	OPTN	10133	B4E184 B7ZA56 H7C1H4 Q96CV9	22523827	NM_001008211
Sox7_2.0x_Union.txt	12017	BU737011	KLHL24	54800	C9J0A6 C9J2N4 C9J3M5 C9JCK3 C9JMQ9 C9JN72 C9JQ67 C9JXR5 Q6TFL4	22523876	NM_017644
Sox7_2.0x_Union.txt	12017	BU675268	ANXA8 /// ANXA8L1 /// ANXA8L2	244	B4DKI1 B4DLF6 B4DQE1 B4DTB3 B4DTC9 B4DTF2 E7EVD9 F5GX16 P13928 Q5T2P7 Q5T2P8 Q5VT79 Q5VTM3	22523882	NM_001039801
Sox7_2.0x_Union.txt	12017	CU443124	EGLN3	112399	A6XP73 B3KVT0 B4DJS9 F8VR39 F8W1G2 G3V3M1 Q3T1B0 Q9H6Z9	22523930	NM_022073
Sox7_2.0x_Union.txt	12017	AV764112	NFKBIZ	64332	C9J5G8 C9J5I7 C9JZ23 H7C5S1 Q9BYH8	22523999	NM_001005474
Sox7_2.0x_Union.txt	12017	AI660920	ITGAV	3685	A5YM53 B4DYQ7 B7Z883 B7ZLX0 E7EWZ6 H7BZG1 P06756	22524001	NM_001144999
Sox7_2.0x_Union.txt	12017	BG184619	PLSCR1	5359	B4DTE8 C9J0H3 C9J7K9 C9J9P4 C9JE06 C9JSI9 F2Z3F2 H7C5I5 O15162 Q8WVK1	22524019	NM_021105
Sox7_2.0x_Union.txt	12017	AI635277	VGLL3	389136	A8MV65 H7C571 Q9UKZ7	22524117	NM_016206
Sox7_2.0x_Union.txt	12017	BQ446236	CYB5R2	51700	A8K237 Q59GV9 Q6BCY4	22524168	NM_001001336
Sox7_2.0x_Union.txt	12017	BF063817	DSC2	1824	A8K2P8 A9X9K9 A9X9L0 B4DLJ5 F8W7U2 Q02487 Q63HM4 Q68DY8	22524188	NM_004949
Sox7_2.0x_Union.txt	12017	AW469192	SOX4	6659	Q06945	22524227	NM_003107
Sox7_2.0x_Union.txt	12017	CD238308	PEG10	23089	B4DSP0 Q86TG7	22524245	NM_001040152
Sox7_2.0x_Union.txt	12017	AA554111	MARCKS	4082	P29966 Q05C82 Q6NVI1	22524302	NM_002356
Sox7_2.0x_Union.txt	12017	AI719994	RGL1	23179	B7Z2W5 B7Z389 B7Z915 B7ZB61 F5H3C3 F5H6U6 Q5SXQ6 Q7Z3U6 Q9NZL6	22524310	NM_015149
Sox7_2.0x_Union.txt	12017	BU784653	PNMA2	10687	Q5U5Z3 Q9UL42	22524335	NM_007257
Sox7_2.0x_Union.txt	12017	BE964833	GARS	2617	F8WCK4 H7C443 P41250	22524341	NM_002047
Sox7_2.0x_Union.txt	12017	AA594975	PBX1	5087	A8K5V0 B4DSC1 B7Z774 F5H4U9 F8WA05 H0YKH1 H0YKN0 H0YLB0 H0YLD4 H0YLF5 H0YLM3 H0YLT4 P40424 Q53YC7 Q68DD6	22524357	NM_001204961
Sox7_2.0x_Union.txt	12017	DB296057	PLSCR1	5359	B4DTE8 C9J0H3 C9J7K9 C9J9P4 C9JE06 C9JSI9 F2Z3F2 H7C5I5 O15162 Q8WVK1	22524358	NM_021105
Sox7_2.0x_Union.txt	12017	BX449937	HSPA1A /// HSPA1B	3303	A8K5I0 B3KTT5 B4DFN9 B4DI39 B4DNT8 B4DNV4 B4DNX1 B4DVU9 B4DWK5 B4E1S9 B4E1T6 B4E388 B4E3B6 E7EP11 E7EP94 F5GZ62 F5H1D3 F8VZJ4 H0YG33 P08107 Q59EJ3 Q5SP16	22524393	NM_005345
Sox7_2.0x_Union.txt	12017	BX445017	TUBA1A	7846	B4DN58 B4DQK4 F8VWX4 F8VXB8 F8VXZ4 Q71U36 Q9UQM3	22524399	NM_001270399
Sox7_2.0x_Union.txt	12017	AU253593	CNOT6L	246175	B4E0K8 B4E2S0 D6RGK9 D6RIW9 H0Y9C1 H0Y9Z5 H0YA76 Q96LI5	22524403	NM_144571
Sox7_2.0x_Union.txt	12017	AA166678	SIPA1L2	57568	A7E2F9 Q9P2F8	22524410	NM_020808
Sox7_2.0x_Union.txt	12017	BX434453	PGF	5228	G3XA84 P49763 Q53XY6 Q86TW6	22524426	NM_001207012
Sox7_2.0x_Union.txt	12017	CB052914	PDE7B	27115	A1E5M1 A8K3G7 H0Y689 Q4LE81 Q6NSC8 Q9NP56	22524471	NM_018945
Sox7_2.0x_Union.txt	12017	AV682654	CFH /// CFHR1	3075	A8K5T0 B1AKG0 C9JYL1 F8WDX4 P08603 Q03591 Q14006 Q5TFM2	22524476	NM_000186
Sox7_2.0x_Union.txt	12017	AI249114	CXADR	1525	B7WPI3 D3YHP0 P78310	22524486	NM_001207063
Sox7_2.0x_Union.txt	12017	AA709403	GABARAPL1	23710	B2RD60 B4E0Y7 F5GX12 F5GYD9 F5GZY7 F5H007 G3V1T7 Q9H0R8	22524509	NM_031412
Sox7_2.0x_Union.txt	12017	R99585	INPP5F	22876	B3KRF1 Q5T993 Q5W135 Q9Y2H2	22524511	NM_001243194
Sox7_2.0x_Union.txt	12017	BX392943	IER2	9592	Q9BTL4	22524529	NM_004907
Sox7_2.0x_Union.txt	12017	AA702942	THRB	7068	B6ZGR7 C9JHC2 C9JJM3 C9JNQ4 C9JTN1 C9JZS5 E0XAW8 F1D8N7 P10828	22524534	NM_000461
Sox7_2.0x_Union.txt	12017	BX099164	FZD8	8325	Q9H461	22524550	NM_031866
Sox7_2.0x_Union.txt	12017	AI472316	LIFR	3977	A8K1Z4 D6RF33 D6RJ94 H0YAF2 P42702	22524631	NM_001127671
Sox7_2.0x_Union.txt	12017	AI033894	SLC17A5	26503	B2RE38 B4DFF2 Q9NRA2	22524642	NM_012434
Sox7_2.0x_Union.txt	12017	BU622379	MRTO4	51154	B4DHZ2 Q9UKD2	22524651	NM_016183
Sox7_2.0x_Union.txt	12017	BG106343	DDIT3	1649	F8VS99 F8W133 P35638 Q53YD1	22524684	NM_001195053
Sox7_2.0x_Union.txt	12017	BF790656	TOB1	10140	P50616 Q2TU63	22524811	NM_001243877
Sox7_2.0x_Union.txt	12017	AV734189	DDIT3	1649	F8VS99 F8W133 P35637 P35638 Q53YD1	22524833	NM_001195053
Sox7_2.0x_Union.txt	12017	CD365380	ETS2	2114	C9JAG2 P15036	22524856	NM_001256295
Sox7_2.0x_Union.txt	12017	DB304587	POLR3G	10622	D6R921 D6R9U7 D6REQ0 D6RIT0 D6RJH6 O15318	22524882	NM_006467
Sox7_2.0x_Union.txt	12017	AA873869	TSHZ2	128553	B1H0U8 B7Z7W1 Q9NRE2	22524954	NM_001193421
Sox7_2.0x_Union.txt	12017	AI685912	SHROOM3	57619	B3KY47 B4E244 C9JK37 Q6ZVL3 Q8TF72 Q96K23	22524975	NM_020859
Sox7_2.0x_Union.txt	12017	AI027957	SHC4	399694	B3KWE9 B3KWT2 B7Z7K3 F5H5M1 H0YLU6 H0YLZ2 Q6S5L8	22524993	NM_203349
Sox7_2.0x_Union.txt	12017	AI274876	SOX4	6659	Q06945	22525011	NM_003107
Sox7_2.0x_Union.txt	12017	AI263437	C9orf91	203197	A8K018 Q5VZI3	22525036	NM_153045
Sox7_2.0x_Union.txt	12017	AI955714	PGM2	55276	B4DN40 B4E0G8 E7ENQ8 E9PD70 F5H6V2 H0Y921 Q96G03	22525042	NM_018290
Sox7_2.0x_Union.txt	12017	AW139567	THBS1	7057	A0PJG0 A8MZG1 B4DDK8 B4E3J7 P07996 Q59E99	22525328	NM_003246
Sox7_2.0x_Union.txt	12017	AK092282	TM4SF18	116441	C9J6Q4 Q96CE8	22525419	NM_001184723
Sox7_2.0x_Union.txt	12017	CR591353	LOX	4015	B0AZT2 B4DQF8 B7ZAJ4 D0PNI2 H0YAL3 P28300	22525481	NM_001178102
Sox7_2.0x_Union.txt	12017	AK075342	C12orf39	80763	F5GXE5 Q9BT56	22525491	NM_030572
Sox7_2.0x_Union.txt	12017	NM_145665	SPANXD /// SPANXE	171489	Q8TAD1 Q9BXN6	22525537	NM_032417
Sox7_2.0x_Union.txt	12017	AB032988	TMX4	56255	E9PIN7 E9PIU6 Q9H1E5	22525774	NM_021156
Sox7_2.0x_Union.txt	12017	DB308423	CEP85L	387119	A2A3P3 B4DYT2 Q3ZCQ5 Q5SZL2	22525809	NM_001042475
Sox7_2.0x_Union.txt	12017	DB308423	CEP85L	387119	A2A3P3 B4DYT2 Q3ZCQ5 Q5SZL2	22525810	NM_001042475
Sox7_2.0x_Union.txt	12017	W92993	RHOJ	57381	G3V476 G3V4H1 Q59G91 Q7Z513 Q9H4E5	22525831	NM_020663
Sox7_2.0x_Union.txt	12017	CR610618	MAML2	84441	A5H1S5 A5H1S6 B7ZL21 Q108H6 Q6UUV9 Q8IZL2	22525832	NM_032427
Sox7_2.0x_Union.txt	12017	AB096957	KRTAP20-2	337976	Q3LI61	22525869	NM_181616
Sox7_2.0x_Union.txt	12017	AB096954	KRTAP6-1	337966	F8WE60 Q3LI64	22525877	NM_181602
Sox7_2.0x_Union.txt	12017	AY371042	ERVK-19 /// ERVK-9	100616102	P61571 P61579 Q6UFV2 Q6UFV3 Q6UFV4 Q6UFV6	22526080	AY371042.1
Sox7_2.0x_Union.txt	12017	AY371042			P61579 Q6UFV6	22526081	AY371042.1
Sox7_2.0x_Union.txt	12017	BC141821	RTKN2	219790	Q5SVY4 Q8IZC4	22526179	NM_145307
Sox7_2.0x_Union.txt	12017	BC017901	PLSCR1	5359	B4DTE8 C9J0H3 C9J7K9 C9J9P4 C9JE06 C9JSI9 F2Z3F2 H7C5I5 O15162 Q8WVK1	22526251	NM_021105
Sox7_2.0x_Union.txt	12017	AK315888	SAT1	6303	A6NM56 B0AZU7 P21673 Q6ICU9 Q9H2N9	22526686	NM_002970
Sox7_2.0x_Union.txt	12017	AK295864	DST /// LOC100652766	100652766	B4DGY0 B4DSS9 E7ERU0 E7ERU2 E7ERX3 E7ESK0 E7ETB9 E9PEB9 E9PHM6 F5H5R6 F6QMI7 F8W9J4 H0YAT7 H0YBX0 H0YC65 H0YC82 Q03001 Q5T0V7 Q6P0N6 Q86T18 Q9BSP9	22526922	NM_001144769
Sox7_2.0x_Union.txt	12017	AK293297	FOSL1	8061	B2R9B4 B4DDQ7 B4DR11 E9PKL5 E9PPX2 E9PQT6 P15407 Q53GM9	22527060	NM_005438
Sox7_2.0x_Union.txt	12017	BC110999	OGFRL1	79627	Q5TC84	22527076	NM_024576
Sox7_2.0x_Union.txt	12017	BC098418	KIF6	221458	B7ZKX5 E2QRG3 E7EUN7 E9PG57 F5H416 F6S0W8 F6VGH2 H0Y718 Q17RI8 Q2MDE8 Q4KMP8 Q5JRK0 Q6ZMV9	22527209	NM_145027
Sox7_2.0x_Union.txt	12017	AK295742	SORBS2	8470	B3KPQ7 B3KPU4 B7Z1G5 B7Z3D7 B7Z997 C9IZ89 C9IZT7 C9J348 C9J372 C9J3W4 C9J4K2 C9J4Z9 C9J620 C9J7Q5 C9J8E3 C9J9D3 C9JBB0 C9JBR8 C9JC90 C9JDX2 C9JEA9 C9JFS9 C9JG84 C9JI79 C9JKV9 C9JL62 C9JLD6 C9JM25 C9JN77 C9JWC3 C9JZ60 E9PAS5 E9PAW4 G3XAI0 H7BXR3 H7BXR4 H7BZK1 H7BZX1 H7C1R7 O94875	22527868	NM_001145670
Sox7_2.0x_Union.txt	12017	BC039715	ANKRD10	55608	B3KTU6 Q8IUW1 Q9H6D6 Q9NXQ9 Q9NXR5	22527876	NM_017664
Sox7_2.0x_Union.txt	12017	AK302893	MICAL2	9645	B4DYS3 E9PJB0 E9PKI3 E9PL42 E9PNC3 E9PRE0 F5H8E8 O94851	22527926	NM_014632
Sox7_2.0x_Union.txt	12017	DQ280491	CALCRL	10203	B8ZZJ4 E7EN01 Q16602 Q2PZS6	22528282	NM_005795
Sox7_2.0x_Union.txt	12017	AK300621	CD55	1604	B1AP13 B1AP15 B2R658 B4DPY4 B4DUF2 E9PSH2 F5H2H0 H3BLV0 H7BY55 P08174 Q14UF2 Q14UF3 Q14UF4 Q14UF5 Q14UF6 Q8TD11 Q8TD12 Q8TD13 Q8TD14	22528546	NM_000574
Sox7_2.0x_Union.txt	12017	BC063596	PTPRK	5796	B4DHC3 B7ZMG0 E9PGC5 E9PMV4 E9PRW2 F5GWP2 F5GXI4 H0Y6P5 H0Y6V4 H0YD44 H0YDP9 Q15262 Q59EZ1 Q5TG12 Q68DT8 Q6P493 Q86WJ2	22528621	NM_001135648
Sox7_2.0x_Union.txt	12017	AK301220	IL7R	3575	B8YG18 D6RCR9 D6RDM4 D6RG28 D6RGV2 D9N160 H0Y8G3 H0YA41 P16871	22528752	NM_002185
Sox7_2.0x_Union.txt	12017	AL832451	GBP2	2634	P32456 Q8TCE5	22528892	NM_004120
Sox7_2.0x_Union.txt	12017	AB240568	CD55	1604	B1AP13 B1AP15 B2R658 B4DPY4 B4DUF2 E9PSH2 F5H2H0 H3BLV0 H7BY55 P08174 Q14UF2 Q14UF3 Q14UF4 Q14UF5 Q14UF6 Q8TD11 Q8TD12 Q8TD13 Q8TD14	22529212	NM_000574
Sox7_2.0x_Union.txt	12017	BT007067	IL8	3576	C9J4T6 P10145	22529712	NM_000584
Sox7_2.0x_Union.txt	12017	BT006880	CXCL1 /// CXCL2	2919	P09341 P19875	22529736	NM_001511
Sox7_2.0x_Union.txt	12017	CA413096	SIPA1L1	26037	A6H8W6 B4DYX7 F5GYF8 G3V4Z3 H0YJY2 O43166 Q5CZ77	22529760	NM_015556
Sox7_2.0x_Union.txt	12017	CA313460			B2RDB2 E9PLS1 E9PPI4 E9PS26 Q96A29 Q96K20	22529853	CA313460
Sox7_2.0x_Union.txt	12017	AW025579	BICC1	80114	A6NGY7 Q9H694	22529892	NM_001080512
Sox7_2.0x_Union.txt	12017	CR605750	CDKN1C	1028	A6NK88 B2D1N3 P49918	22530204	NM_000076
Sox7_2.0x_Union.txt	12017	CR623093	FKBP9	11328	A7YQ73 B3KQQ0 B7Z1G9 B7Z1U8 B7Z230 B7Z6H3 B7Z994 B7ZAH5 C9J4P8 O95302	22530214	NM_007270
Sox7_2.0x_Union.txt	12017	AL834243	UACA	55075	B7ZKM6 B7ZKM7 F5H2B9 G3XAG2 H0YMI1 H0YN48 H0YNH8 Q05DB3 Q8NDD7 Q96NH6 Q9BZF9	22530329	NM_001008224
Sox7_2.0x_Union.txt	12017	AW340316	NAB1	4664	A8K8T1 B4DKG1 B8ZZS2 C9J3V0 C9JFF6 C9JID4 C9JJ42 C9JL92 F8W8J7 H0Y4C5 Q13506	22530505	NM_005966
Sox7_2.0x_Union.txt	12017	AA532381	ID4	3400	P47928	22530596	NM_001546
Sox7_2.0x_Union.txt	12017	NM_001881	CREM	1390	A8MPQ2 C9IYM9 C9IYZ7 C9J2J0 C9J5A7 C9J6H3 C9J785 C9J7W3 C9JAW9 C9JK96 C9JZ10 C9K092 E9PAR2 E9PAR4 E9PB41 E9PBM5 E9PHM1 F8WB03 F8WDF2 G5E998 H7C4X0 Q03060 Q59FC7 Q5W1A7 Q5W1B0	22491418	NM_001267562
Sox7_2.0x_Union.txt	12017	BX642069	WDR35	57539	B3KR94 F8WB94 H0Y6C0 H7BZK8 Q69YM0 Q9P2L0	22491435	NM_001006657
Sox7_2.0x_Union.txt	12017	NM_001005619	ITGB4	3691	B4E3N0 B7ZLD5 B7ZLD8 H0Y6G1 P16144 Q0VF97 Q2VP98 Q59H46	22491464	NM_000213
Sox7_2.0x_Union.txt	12017	NM_007098	CLTCL1	8218	A4FU99 B7Z1Z7 B7Z2Y4 F5H5N6 H0Y529 H0YGJ9 P53675	22491476	NM_001835
Sox7_2.0x_Union.txt	12017	U64317	NEDD9	4739	A8K9G7 D6RBQ2 D6RDV1 D6REP7 D6RGD7 G5E9Y9 Q14511	22491542	NM_001142393
Sox7_2.0x_Union.txt	12017	NM_006403	NEDD9	4739	A8K9G7 D6RBQ2 D6RDV1 D6REP7 D6RGD7 G5E9Y9 Q14511	22491543	NM_001142393
Sox7_2.0x_Union.txt	12017	L43821	NEDD9	4739	A8K9G7 D6RBQ2 D6RDV1 D6REP7 D6RGD7 G5E9Y9 Q14511	22491544	NM_001142393
Sox7_2.0x_Union.txt	12017	NM_024761	MOB3B	79817	Q86TA1	22491653	NM_024761
Sox7_2.0x_Union.txt	12017	AL832572	MOB3B	79817	Q86TA1	22491654	NM_024761
Sox7_2.0x_Union.txt	12017	NM_000575	IL1A	3552	P01583 Q53QF9	22491684	NM_000575
Sox7_2.0x_Union.txt	12017	NM_015473	HEATR5A	25938	B5MC49 E9PB09 F5H619 F8VQQ6 H0YHE0 H0YHS5 H0YIW3 H7C5W6 Q86XA9	22491715	NM_015473
Sox7_2.0x_Union.txt	12017	NM_016150	ASB2	51676	B3KPZ6 F5H1I7 G3V2Z2 G3V3P8 G3V484 G3V4B2 Q96Q27	22491725	NM_001202429
Sox7_2.0x_Union.txt	12017	CD172116	CAMK2D	817	B7Z2B0 H0Y9J2 Q13557 Q4G1A8 Q92991	22491813	NM_001221
Sox7_2.0x_Union.txt	12017	BU733597	VEGFA	7422	H3BLW7 H3BLW8 P15692 Q59FH5 Q6WZM0 Q96FD9	22491856	NM_001025366
Sox7_2.0x_Union.txt	12017	NM_001025366	VEGFA	7422	H3BLW7 H3BLW8 P15692 Q59FH5 Q6WZM0 Q96FD9	22491857	NM_001025366
Sox7_2.0x_Union.txt	12017	NM_001025366	VEGFA	7422	H3BLW7 H3BLW8 P15692 Q59FH5 Q6WZM0 Q96FD9	22491858	NM_001025366
Sox7_2.0x_Union.txt	12017	NM_138786	TM4SF18	116441	C9J6Q4 Q96CE8	22491889	NM_001184723
Sox7_2.0x_Union.txt	12017	NM_017839	LPCAT2	54947	H3BU68 Q7L5N7	22491903	NM_017839
Sox7_2.0x_Union.txt	12017	AK023271	LPCAT2	54947	H3BU68 Q7L5N7	22491905	NM_017839
Sox7_2.0x_Union.txt	12017	NM_014398	LAMP3	27074	B2R7Z2 B4DZF5 C9JDI8 C9JYP5 E7ETP9 Q9UQV4	22491915	NM_014398
Sox7_2.0x_Union.txt	12017	NM_006033	LIPG	9388	A8K6Y4 B2RCS7 B4DTR8 Q9Y5X9	22491955	NM_006033
Sox7_2.0x_Union.txt	12017	NM_018018	SLC38A4	55089	E7EMG3 F8VQY9 F8VRD9 H0YHZ8 Q969I6 Q9NWA2	22491998	NM_001143824
Sox7_2.0x_Union.txt	12017	NM_207627	ABCG1	9619	A8K7Y7 B4DPT7 C9JKD9 E7ERE5 E9PGV9 H7C4M6 H7C5J9 H7C5M2 O43576 P45844	22492003	NM_004915
Sox7_2.0x_Union.txt	12017	NM_005329	HAS3	3038	C0KZD9 H3BRH5 O00219 Q96RV2	22492070	NM_001199280
Sox7_2.0x_Union.txt	12017	NM_002943	RORA	6095	B6ZGS4 F1DAL0 H0YII6 H0YLS5 P35398 Q59E95	22492162	NM_002943
Sox7_2.0x_Union.txt	12017	NM_017526	LEPROT	54741	O15243	22492164	NM_001198681
Sox7_2.0x_Union.txt	12017	NM_001130142	VWA5A	4013	A8K6N3 B2RC43 B4DHS6 G3V152 O00534	22492178	NM_001130142
Sox7_2.0x_Union.txt	12017	AK290378	SDPR	8436	A8K2W3 O95810	22492180	NM_004657
Sox7_2.0x_Union.txt	12017	NM_004657	SDPR	8436	A8K2W3 O95810	22492181	NM_004657
Sox7_2.0x_Union.txt	12017	NM_032494	ZC3H8	84524	Q8N5P1	22492267	NM_032494
Sox7_2.0x_Union.txt	12017	NM_000958	PTGER4	5734	A0PJF5 P35408	22492279	NM_000958
Sox7_2.0x_Union.txt	12017	NM_023112	OTUB2	78990	Q8WYS4 Q96DC9 Q9BWI9	22492317	NM_023112
Sox7_2.0x_Union.txt	12017	NM_023112	OTUB2	78990	Q8WYS4 Q96DC9 Q9BWI9	22492318	NM_023112
Sox7_2.0x_Union.txt	12017	NM_022918	TMEM135	65084	A8K6Y9 B4DKZ1 B4DYK0 Q7Z760 Q86UB9 Q8N605	22492388	NM_001168724
Sox7_2.0x_Union.txt	12017	AL832194	S1PR3	1903	Q99500	22492391	NM_005226
Sox7_2.0x_Union.txt	12017	BC053667	LGALS3	3958	G3V3R6 G3V407 P17931 Q59FR8 Q6FGL0 Q6NVH9 Q86TY5 Q9H2J5 Q9H2J6	22492423	NM_001177388
Sox7_2.0x_Union.txt	12017	BC006478	CALB1	793	B7Z380 B7Z9J4 E5RG14 E5RIZ8 P05937	22492465	NM_004929
Sox7_2.0x_Union.txt	12017	AY358554	LAYN	143903	B4DDS5 B4DJU0 B4DP26 E9PMI0 E9PQU7 E9PR90 Q6UX15	22492490	NM_001258390
Sox7_2.0x_Union.txt	12017	NM_032876	AJUBA	84962	A8MX18 G3V481 G3V5F5 H0YJL9 Q96IF1	22492498	NM_032876
Sox7_2.0x_Union.txt	12017	BC034968	AJUBA	84962	A8MX18 G3V481 G3V5F5 H0YJL9 Q96IF1	22492499	NM_032876
Sox7_2.0x_Union.txt	12017	BC009720	EDN1	1906	P05305 Q6FH53	22492509	NM_001168319
Sox7_2.0x_Union.txt	12017	NM_001955	EDN1	1906	P05305 Q6FH53	22492510	NM_001168319
Sox7_2.0x_Union.txt	12017	NM_001062	TCN1	6947	P20061	22492610	NM_001062
Sox7_2.0x_Union.txt	12017	AK299139	PKP2	5318	A0AV37 B4DR79 B8QGS6 B8QGS7 B8QGS8 B8QGS9 Q99959	22492616	NM_001005242
Sox7_2.0x_Union.txt	12017	NM_001005242	PKP2	5318	A0AV37 B4DR79 B8QGS6 B8QGS7 B8QGS8 B8QGS9 Q99959	22492617	NM_001005242
Sox7_2.0x_Union.txt	12017	NM_001198	PRDM1	639	A1YZ20 A8K0J1 B2REA4 B2REA5 B4DW27 F5H6S3 O75626 Q3SYG0 Q658W0	22492704	NM_001198
Sox7_2.0x_Union.txt	12017	U04898	RORA	6095	B6ZGS4 F1DAL0 H0YII6 H0YLS5 P35398 Q59E95	22492730	NM_002943
Sox7_2.0x_Union.txt	12017	NM_004355	CD74	972	B4DUJ2 E7EQJ3 E7ER71 E7ESL3 H0YBZ2 H0YBZ8 O78208 P04233	22492741	NM_001025158
Sox7_2.0x_Union.txt	12017	NM_003733	OASL	8638	B2RAZ2 B3KN79 H0YGP3 Q15646	22492850	NM_001261825
Sox7_2.0x_Union.txt	12017	NM_152586	USP54	159195	B4E129 B7Z7X1 E7EW90 G8JLB5 H7C1E9 H7C296 Q70EL1	22492899	NM_152586
Sox7_2.0x_Union.txt	12017	NM_178868	CMTM8	152189	A5D6I7 Q8IZV2	22492923	NM_178868
Sox7_2.0x_Union.txt	12017	NM_173511	FAM117B	150864	Q6P1L5 Q7Z3M2	22492945	NM_173511
Sox7_2.0x_Union.txt	12017	NM_003612	SEMA7A	8482	B3KMH6 B4DDP7 F5GYX3 F5H1S0 H3BMF9 O75326	22493058	NM_001146029
Sox7_2.0x_Union.txt	12017	BC047620	GUCY1B3	2983	B2RCP1 B7Z426 B7Z685 B7Z6G8 B7Z9H9 D6RC99 E9PCN2 Q02153	22493067	NM_000857
Sox7_2.0x_Union.txt	12017	AK292029	CCNG2	901	B4DF25 Q16589 Q6FGA7 Q6FGC6 Q8N5D4	22493110	NM_004354
Sox7_2.0x_Union.txt	12017	U47414	CCNG2	901	B4DF25 Q16589 Q6FGA7 Q6FGC6 Q8N5D4	22493111	NM_004354
Sox7_2.0x_Union.txt	12017	AK095364	C9orf91	203197	A8K018 Q5VZI3	22493238	NM_153045
Sox7_2.0x_Union.txt	12017	NM_014332	SMPX	23676	Q9UHP9	22493254	NM_014332
Sox7_2.0x_Union.txt	12017	NM_001032731	OAS2	4939	A8KA41 F8VPI5 F8W1C5 P29728 Q7Z6D0	22493264	NM_001032731
Sox7_2.0x_Union.txt	12017	NM_000213	ITGB4	3691	B4E3N0 B7ZLD5 B7ZLD8 H0Y6G1 P16144 Q0VF97 Q2VP98 Q59H46	22493281	NM_000213
Sox7_2.0x_Union.txt	12017	NM_203349	SHC4	399694	B3KWE9 B3KWT2 B7Z7K3 F5H5M1 H0YLU6 H0YLZ2 Q6S5L8	22493335	NM_203349
Sox7_2.0x_Union.txt	12017	NM_001003679	LEPR	3953	A2RRQ4 A8K2E3 P48357 Q4G138	22493357	NM_001003679
Sox7_2.0x_Union.txt	12017	BG568641	CP	1356	A5PL27 A8K5A4 B3KTA8 B7Z5Q2 D6RE86 E9PFZ2 H7C5N5 H7C5R1 P00450 Q6NSB2	22493467	NM_000096
Sox7_2.0x_Union.txt	12017	BU674634	ANKRD11	29123	A8K4M9 H0Y2U4 Q59GC3 Q6PEL2 Q6UB99 Q7Z5E5 Q8IVY9 Q8NAQ8 Q9UHR3	22493550	NM_001256182
Sox7_2.0x_Union.txt	12017	NM_013275	ANKRD11	29123	A8K4M9 Q59GC3 Q6PEL2 Q6UB99 Q7Z5E5 Q8IVY9 Q8NAQ8 Q9UHR3	22493551	NM_001256182
Sox7_2.0x_Union.txt	12017	AF121775	ANKRD11	29123	A8K4M9 H0Y2U4 Q59GC3 Q6PEL2 Q6UB99 Q7Z5E5 Q8IVY9 Q8NAQ8 Q9UHR3	22493552	NM_001256182
Sox7_2.0x_Union.txt	12017	NM_020704	FAM40B	57464	A8K2A0 B7Z7P3 Q9ULQ0	22493653	NM_001134336
Sox7_2.0x_Union.txt	12017	NM_001130518	CSGALNACT1	55790	E5RGB2 E5RGK2 E5RJB6 E5RK93 Q8TDX6	22493709	NM_001130518
Sox7_2.0x_Union.txt	12017	NM_153006	NAGS	162417	Q2NKP2 Q8N159	22493809	NM_153006
Sox7_2.0x_Union.txt	12017	NM_153006	NAGS	162417	Q2NKP2 Q8N159	22493810	NM_153006
Sox7_2.0x_Union.txt	12017	NM_025237	SOST	50964	Q7Z2R3 Q7Z4G0 Q9BQB4	22493814	NM_025237
Sox7_2.0x_Union.txt	12017	AY358203	SOST	50964	Q7Z2R3 Q7Z4G0 Q9BQB4	22493815	NM_025237
Sox7_2.0x_Union.txt	12017	NM_006009	TUBA1A	7846	B4DN58 B4DQK4 F8VWX4 F8VXB8 F8VXZ4 Q71U36 Q9UQM3	22493848	NM_001270399
Sox7_2.0x_Union.txt	12017	NM_001448	GPC4	2239	B4E2C0 F5H5T3 O75487	22493889	NM_001448
Sox7_2.0x_Union.txt	12017	BC017166	GPC4	2239	B4E2C0 F5H5T3 O75487	22493890	NM_001448
Sox7_2.0x_Union.txt	12017	NM_030965	ST6GALNAC5	81849	B3KTL1 B4DHB7 B4DV27 F2Z2C8 Q9BVH7	22493933	NM_030965
Sox7_2.0x_Union.txt	12017	NM_001870	CPA3	1359	B2R941 P15088	22494023	NM_001870
Sox7_2.0x_Union.txt	12017	NM_001723	DST /// LOC100652766	100652766	B4DGY0 B4DSS9 E7ERU0 E7ERU2 E7ERX3 E7ESK0 E7ETB9 E9PEB9 E9PHM6 F5H5R6 F6QMI7 F8W9J4 H0YAT7 H0YBX0 H0YC65 H0YC82 Q03001 Q5T0V7 Q6P0N6 Q86T18 Q9BSP9	22494141	NM_001144769
Sox7_2.0x_Union.txt	12017	NM_017947	MOCOS	55034	Q96EN8	22494161	NM_017947
Sox7_2.0x_Union.txt	12017	NM_000641	IL11	3589	A8K3F7 B4DQV5 P20809	22494176	NM_000641
Sox7_2.0x_Union.txt	12017	NM_006557	DMRT2	10655	Q05C20 Q5HYK2 Q9NQR6 Q9Y5R5	22494214	NM_001130865
Sox7_2.0x_Union.txt	12017	NM_024420	PLA2G4A	5321	A8K2S1 B4DZI4 E7EU42 P47712 Q14064	22494240	NM_024420
Sox7_2.0x_Union.txt	12017	BC017387	SPP1	6696	A6XMV6 B7Z351 C4B6Q2 C9JXD2 D6R9C5 F2YBS4 F2YBS5 F2YQ21 P10451 Q3LGB0	22494276	NM_000582
Sox7_2.0x_Union.txt	12017	BU630777	NDFIP2	54602	B4DGY6 B4DLX2 H0Y8A7 H7C5F7 Q9NV92	22494283	NM_001161407
Sox7_2.0x_Union.txt	12017	NM_015131	WDR43	23160	C9IZK7 C9JEE7 C9JH61 H7C2H8 Q15061 Q8TB67	22494320	NM_015131
Sox7_2.0x_Union.txt	12017	BC070065	FOXO1	2308	F8TAD1 Q12778	22494415	NM_002015
Sox7_2.0x_Union.txt	12017	BC004869	FAXC	84553	Q5TGI0 Q9BR58	22494476	NM_032511
Sox7_2.0x_Union.txt	12017	NM_014707	HDAC9	9734	B5MCF1 B7Z3P7 B7Z4I4 B7Z928 B7Z940 C9IZS0 C9J1W4 C9J835 C9JD56 C9JLX1 C9JS87 E7EX34 F8W9E0 F8WDS2 G8JL94 H0Y2W0 Q68D71 Q8N879 Q8N926 Q9UKV0	22494562	NM_001204144
Sox7_2.0x_Union.txt	12017	NM_021150	GRIP1	23426	B4DIF3 F5H3F9 F5H3G9 F5H424 F5H4M4 F5H4N6 F5H4P8 F5H4Q7 F5H5I0 H0YFK8 H0YFY3 H0YGF1 H0YGM4 Q9Y3R0	22494596	NM_001178074
Sox7_2.0x_Union.txt	12017	NM_001008540	CXCR4	7852	P61073 Q5MIL4	22494675	NM_001008540
Sox7_2.0x_Union.txt	12017	NM_001008540	CXCR4	7852	P61073 Q5MIL4	22494676	NM_001008540
Sox7_2.0x_Union.txt	12017	NM_001008540	CXCR4	7852	P61073 Q5MIL4	22494677	NM_001008540
Sox7_2.0x_Union.txt	12017	NM_021101	CLDN1	9076	A5JSJ9 B4DLC3 O95832 Q7Z4X9	22494718	NM_021101
Sox7_2.0x_Union.txt	12017	BC020729	CCNE2	9134	E5RHN2 E5RK20 H0YBQ2 O96020 Q8WUE3	22494787	NM_004702
Sox7_2.0x_Union.txt	12017	NM_016315	GULP1	51454	B3KN52 B4DQ40 B8ZZ72 B8ZZL1 E9PB86 H0Y6R1 H7BZV7 Q59EC1 Q9UBP9	22494791	NM_001252668
Sox7_2.0x_Union.txt	12017	AF200715	GULP1	51454	B3KN52 B4DQ40 B8ZZ72 B8ZZL1 E9PB86 H0Y6R1 H7BZV7 Q59EC1 Q9UBP9	22494792	NM_001252668
Sox7_2.0x_Union.txt	12017	AF200715	GULP1	51454	B3KN52 B4DQ40 B8ZZ72 B8ZZL1 E9PB86 H0Y6R1 H7BZV7 Q59EC1 Q9UBP9	22494793	NM_001252668
Sox7_2.0x_Union.txt	12017	BF439987	DCLK1	9201	B7Z2T7 B7Z5K4 B7Z655 O15075 Q5VZY9	22494828	NM_001195415
Sox7_2.0x_Union.txt	12017	BC021675	TSPAN2	10100	B1AKP1 B1AKP2 B2RD31 D6PTH4 O60636	22494874	NM_005725
Sox7_2.0x_Union.txt	12017	NM_017754	UHRF1BP1	54887	B2RNT9 H7C1J4 Q6BDS2 Q6N082	22494912	NM_017754
Sox7_2.0x_Union.txt	12017	AF051851	SVIL	6840	B4DXQ4 B4E3H1 B4E3N7 F5GXV0 F5GY75 F5H2Q5 O95425 Q569J5 Q63HL8 Q659E9	22494983	NM_003174
Sox7_2.0x_Union.txt	12017	NM_003174	SVIL	6840	B4DXQ4 B4E3H1 B4E3N7 F5GXV0 F5GY75 F5H2Q5 O95425 Q569J5 Q63HL8 Q659E9	22494984	NM_003174
Sox7_2.0x_Union.txt	12017	NM_003174	SVIL	6840	B4DXQ4 B4E3H1 B4E3N7 F5GXV0 F5GY75 F5H2Q5 O95425 Q569J5 Q63HL8 Q659E9	22494985	NM_003174
Sox7_2.0x_Union.txt	12017	NM_145307	RTKN2	219790	Q5SVY4 Q8IZC4	22495050	NM_145307
Sox7_2.0x_Union.txt	12017	NM_032587	CARD6	84674	B4E2N1 Q59EG7 Q6XZE5 Q9BX69	22495103	NM_032587
Sox7_2.0x_Union.txt	12017	AK023426	BMPR2	659	A8K8R5 Q13873 Q597H5	22495185	NM_001204
Sox7_2.0x_Union.txt	12017	BC001288	CD55	1604	B1AP13 B1AP15 B2R658 B4DPY4 B4DUF2 E9PSH2 F5H2H0 H3BLV0 H7BY55 P08174 Q14UF2 Q14UF3 Q14UF4 Q14UF5 Q14UF6 Q8TD11 Q8TD12 Q8TD13 Q8TD14	22495187	NM_000574
Sox7_2.0x_Union.txt	12017	AK302568	ZBTB38	253461	B3KST1 B4DYR8 D6R9I1 D6R9J6 D6R9U6 D6RAC4 D6RBC4 D6RC86 D6RE69 D6RGK1 D6RHD1 D6RJE1 Q32Q70 Q8NAP3 Q96NB8 Q9H6F0	22495220	NM_001080412
Sox7_2.0x_Union.txt	12017	CA948182	ZBTB38	253461	B3KST1 B4DYR8 D6R9I1 D6R9J6 D6R9U6 D6RAC4 D6RBC4 D6RC86 D6RE69 D6RGK1 D6RHD1 D6RJE1 Q32Q70 Q8NAP3 Q96NB8 Q9H6F0	22495221	NM_001080412
Sox7_2.0x_Union.txt	12017	AK290052	ARAP3	64411	A8K1Y7 B3KMD0 B4DIT1 E5RJU5 G5E9Y3 Q05CA7 Q05CH1 Q8WWN8 Q96G49 Q9H7C1	22495228	NM_022481
Sox7_2.0x_Union.txt	12017	BC059363	ST6GALNAC3	256435	B4DM98 F8W9K9 H0Y514 H7BYM5 Q8NDV1	22495255	NM_001160011
Sox7_2.0x_Union.txt	12017	NM_002849	PTPRR	5801	B7Z3J1 B7Z956 B7Z998 F5GXR7 F8VU63 F8VVE9 Q05B41 Q0VD90 Q15256 Q2TAJ3 Q569H9 Q68CP6 Q7Z2V8	22495273	NM_001207015
Sox7_2.0x_Union.txt	12017	U34038	F2RL1	2150	D6RJH3 P55085	22495313	NM_005242
Sox7_2.0x_Union.txt	12017	NM_005242	F2RL1	2150	D6RJH3 P55085	22495314	NM_005242
Sox7_2.0x_Union.txt	12017	U90065	KCNK1	3775	B2RA30 O00180 Q5T5E6 Q5T5E7	22495328	NM_002245
Sox7_2.0x_Union.txt	12017	BU621175	C10orf47	254427	A0JLS4 A6NDS2 D3DRR9 Q86WR7	22495329	NM_153256
Sox7_2.0x_Union.txt	12017	NM_153256	C10orf47	254427	A0JLS4 A6NDS2 D3DRR9 Q86WR7	22495330	NM_153256
Sox7_2.0x_Union.txt	12017	NM_001018073	PCK2	5106	B4DW73 H0YKC4 H0YM31 H0YMA5 H0YML5 H0YMU6 H0YMY3 H0YNG4 H0YNH9 Q16822 Q6IB91	22495353	NM_001018073
Sox7_2.0x_Union.txt	12017	AK293052	RBM24	221662	A8KAI7 B7Z6B4 B7Z6B7 E9PAY4 H0YA61 Q9BX46	22495358	NM_001143941
Sox7_2.0x_Union.txt	12017	NM_001143942	RBM24	221662	A8KAI7 B7Z6B4 B7Z6B7 E9PAY4 Q9BX46	22495359	NM_001143941
Sox7_2.0x_Union.txt	12017	NM_015440	MTHFD1L	25902	B2RD24 B7ZM99 Q6UB35	22495472	NM_001242767
Sox7_2.0x_Union.txt	12017	U22398	CDKN1C	1028	A6NK88 B2D1N3 P49918	22495604	NM_000076
Sox7_2.0x_Union.txt	12017	NM_005308	GRK5	2869	B2R7K0 B4DPB3 B4DWB2 G8JLE8 P34947 Q24JT8 Q5T060 Q71RG8	22495713	NM_005308
Sox7_2.0x_Union.txt	12017	NM_001321	CSRP2	1466	F8VQR7 F8VW96 Q16527 Q59FY8	22495724	NM_001321
Sox7_2.0x_Union.txt	12017	NM_001321	CSRP2	1466	F8VQR7 F8VW96 Q16527 Q59FY8	22495725	NM_001321
Sox7_2.0x_Union.txt	12017	BC034991	MNS1	55329	B3KQ70 Q8NEH6	22495744	NM_018365
Sox7_2.0x_Union.txt	12017	NM_006945	SPRR2D	6703	P22532	22495751	NM_006945
Sox7_2.0x_Union.txt	12017	NM_006945	SPRR2D	6703	P22532	22495752	NM_006945
Sox7_2.0x_Union.txt	12017	BC074807	MMP13	4322	A8K846 B2RCZ3 G5E971 P45452 Q53H33 Q6NWN6 Q7Z5M0 Q7Z5M1	22495783	NM_002427
Sox7_2.0x_Union.txt	12017	NM_024721	ZFHX4	79776	E5RG79 E5RGK3 E5RHS1 E5RI93 E7ER53 E7EVZ1 G3V138 H0YBV0 H0YC81 Q5U3C1 Q6DK57 Q6ZMW8 Q6ZN29 Q86UP3 Q86WW5 Q9H7F3	22495814	NM_024721
Sox7_2.0x_Union.txt	12017	NM_020167	NMUR2	56923	Q9GZQ4	22495983	NM_020167
Sox7_2.0x_Union.txt	12017	AF272363	NMUR2	56923	Q9GZQ4	22495984	NM_020167
Sox7_2.0x_Union.txt	12017	AK292188	XBP1	7494	A8K823 B1AHH1 B1AHH2 F8WDI6 P17861	22496061	NM_001079539
Sox7_2.0x_Union.txt	12017	BC142993	KLHL24	54800	C9J0A6 C9J2N4 C9J3M5 C9JCK3 C9JMQ9 C9JN72 C9JQ67 C9JXR5 Q6TFL4	22496177	NM_017644
Sox7_2.0x_Union.txt	12017	NM_005988	SPRR2A	6700	P35326	22496198	NM_005988
Sox7_2.0x_Union.txt	12017	NM_005988	SPRR2A	6700	P35326	22496199	NM_005988
Sox7_2.0x_Union.txt	12017	DB354916	H6PD	9563	O95479 Q8IZE8	22496343	NM_004285
Sox7_2.0x_Union.txt	12017	NM_000716	C4BPB	725	B4DDY0 P20851	22496385	NM_000716
Sox7_2.0x_Union.txt	12017	NM_000325	PITX2	5308	A8K6C6 A8MUL9 D6RBG8 D6RFI4 G3V2Z0 Q99697	22496421	NM_000325
Sox7_2.0x_Union.txt	12017	NM_021571	CARD18	59082	G5EA35 P57730	22496464	NM_021571
Sox7_2.0x_Union.txt	12017	NM_173576	MKX	283078	H0YKC7 H0YMU2 Q8IYA7	22496518	NM_001242702
Sox7_2.0x_Union.txt	12017	N20862	SLC2A12	154091	Q8TD20	22496725	NM_145176
Sox7_2.0x_Union.txt	12017	AY046419	SLC2A12	154091	Q8TD20	22496726	NM_145176
Sox7_2.0x_Union.txt	12017	AY358326	LNX1	84708	B4DGI5 D6RAH9 D6RB76 D6RE08 F5GZH4 Q8TBB1	22496736	NM_001126328
Sox7_2.0x_Union.txt	12017	AY358326	LNX1	84708	B4DGI5 D6RAH9 D6RB76 D6RE08 F5GZH4 Q8TBB1	22496737	NM_001126328
Sox7_2.0x_Union.txt	12017	L76380	CALCRL	10203	B8ZZJ4 E7EN01 Q16602 Q2PZS6	22496760	NM_005795
Sox7_2.0x_Union.txt	12017	NM_005795	CALCRL	10203	B8ZZJ4 E7EN01 Q16602 Q2PZS6	22496761	NM_005795
Sox7_2.0x_Union.txt	12017	NM_005585	SMAD6	4091	H0YK80 H0YM33 O43541	22496824	NM_001142861
Sox7_2.0x_Union.txt	12017	AK289954	SEMA3A	10371	C9J9C4 C9JD25 Q14563	22496876	NM_006080
Sox7_2.0x_Union.txt	12017	NM_006080	SEMA3A	10371	C9J9C4 C9JD25 Q14563	22496877	NM_006080
Sox7_2.0x_Union.txt	12017	NM_004833	AIM2	9447	O14862 Q5T3V8 Q5T3W0	22496943	NM_004833
Sox7_2.0x_Union.txt	12017	NM_004833	AIM2	9447	O14862 Q5T3V8 Q5T3W0	22496944	NM_004833
Sox7_2.0x_Union.txt	12017	NM_005574	LMO2	4005	P25791	22496955	NM_001142315
Sox7_2.0x_Union.txt	12017	BC012907	MXI1	4601	B1ANN8 F6U3F6 F6WCI9 P50539	22496984	NM_001008541
Sox7_2.0x_Union.txt	12017	NM_003038	SLC1A4	6509	B2R7N6 B7Z561 B7Z9M1 E1B6X0 P43007 Q53F03 Q9P2X2	22497100	NM_001135581
Sox7_2.0x_Union.txt	12017	NM_206999	CNOT1	23019	A5YKK6 B3KPW6 B4DTM8 B4DYL7 B5MDN3 B7Z6X2 F5H1F4 F8WA87 H3BMH0 H3BMZ2 H3BNB1 H3BPF1 H3BR89 H3BT18 H3BTH2 H3BU44 H3BUY8 H3BVC9	22497141	NM_001265612
Sox7_2.0x_Union.txt	12017	NM_004577	PSPH	5723	C9JBI3 C9JEJ7 F8WD74 P78330 Q53EY1	22497282	NM_004577
Sox7_2.0x_Union.txt	12017	CK001625	MXI1	4601	B1ANN8 F6U3F6 F6WCI9 P50539	22497329	NM_001008541
Sox7_2.0x_Union.txt	12017	AA716425	JDP2	122953	H0YKE4 Q8WYK2	22497389	NM_001135047
Sox7_2.0x_Union.txt	12017	NM_145665	SPANXD /// SPANXE	171489	Q4KRP2 Q4KRP8 Q8TAD1 Q9BXN6	22497616	NM_032417
Sox7_2.0x_Union.txt	12017	NM_001002264	EPSTI1	94240	F5H4H1 F5H799 Q96J88	22497667	NM_001002264
Sox7_2.0x_Union.txt	12017	NM_152754	SEMA3D	223117	C9JYT6 O95025	22497681	NM_152754
Sox7_2.0x_Union.txt	12017	NM_139058	ARX	170302	Q96QS3	22497697	NM_139058
Sox7_2.0x_Union.txt	12017	NM_001100829	TMEM170B	100113407	Q5T4T1	22497744	NM_001100829
Sox7_2.0x_Union.txt	12017	NM_014951	ZNF365	22891	C9J1G1 Q08ER3 Q495P1 Q70YC4 Q70YC5	22497749	NM_014951
Sox7_2.0x_Union.txt	12017	AK290427	IFIT3	3437	B4DLS7 O14879 Q5T765	22497893	NM_001031683
Sox7_2.0x_Union.txt	12017	NM_005410	SEPP1	6414	B4E0P7 D6REX5 D6RIS9 P49908 Q4G0S7	22497919	NM_001085486
Sox7_2.0x_Union.txt	12017	AK096232	SESTD1	91404	B3KTX3 C9J4X8 C9JHW6 F8WFB2 H0Y774 H7BXT9 H7BZR8 Q7Z6D3 Q86VW0 Q9UFF8	22498025	NM_178123
Sox7_2.0x_Union.txt	12017	AU147415	FRMD4B	23150	B3KNA2 B4DHD5 C9J6Q2 C9J7M5 C9JA15 C9JAW0 C9JBX2 C9JYK2 E9PGA7 F5H6F3 H7C550 Q2TB00 Q6PEW6 Q9Y2L6	22498059	NM_015123
Sox7_2.0x_Union.txt	12017	NM_015123	FRMD4B	23150	B3KNA2 B4DHD5 C9J6Q2 C9J7M5 C9JA15 C9JAW0 C9JBX2 C9JYK2 E9PGA7 F5H6F3 H7C550 Q2TB00 Q6PEW6 Q9Y2L6	22498060	NM_015123
Sox7_2.0x_Union.txt	12017	BC011625	ZNF503	84858	A8K2P6 B3KXM8 Q96F45	22498082	NM_032772
Sox7_2.0x_Union.txt	12017	U16261	IL24	11009	E7ER64 E9PMT7 E9PN59 E9PPV1 E9PQG1 O60667 Q13007 Q2YHE6	22498320	NM_001185156
Sox7_2.0x_Union.txt	12017	NM_004775	B4GALT6	9331	B2RBX9 G3XA83 Q59GB5 Q6NT00 Q6NT09 Q8WZ95 Q9UBX8	22498327	NM_004775
Sox7_2.0x_Union.txt	12017	AF097159	B4GALT6	9331	B2RBX9 G3XA83 Q59GB5 Q6NT00 Q6NT09 Q8WZ95 Q9UBX8	22498328	NM_004775
Sox7_2.0x_Union.txt	12017	NM_002260	KLRC1 /// KLRC2	3821	A8MYW4 B4DIC6 F5GYZ0 F5H518 H0YFK4 H0YGB7 H0YGY2 P26715 P26717 Q3KQS7	22498334	NM_002259
Sox7_2.0x_Union.txt	12017	NM_002820	PTHLH	5744	P12272 Q53XY9	22498383	NM_002820
Sox7_2.0x_Union.txt	12017	NM_000202	IDS	3423	B3KWA1 B4DGD7 B4DIX1 E5RHJ1 H0YB91 O60597 P22304	22498617	NM_000202
Sox7_2.0x_Union.txt	12017	BQ000521	IDS	3423	B3KWA1 B4DGD7 B4DIX1 E5RHJ1 H0YB91 O60597 P22304	22498618	NM_000202
Sox7_2.0x_Union.txt	12017	BC031101	TUBE1	51175	Q5H8W9 Q9UJT0	22498705	NM_016262
Sox7_2.0x_Union.txt	12017	AI912275	BCL11A	53335	B3KNX8 B3KRW8 B4DMK8 B4DT16 D6W5D9 E9PEP4 F5H2Y4 Q66LN6 Q9H165	22498825	NM_018014
Sox7_2.0x_Union.txt	12017	NM_003914	CCNA1	8900	B2RAM9 B7Z7E3 P78396	22498836	NM_001111045
Sox7_2.0x_Union.txt	12017	NM_001144002	CTPS2	56474	E9PBY8 H0Y5S6 Q9H6Q0 Q9NRF8	22498847	NM_001144002
Sox7_2.0x_Union.txt	12017	NM_018371	CSGALNACT1	55790	E5RGB2 E5RGK2 E5RJB6 E5RK93 Q8TDX6	22499012	NM_001130518
Sox7_2.0x_Union.txt	12017	BC136404	EREG	2069	B2RC66 O14944	22499204	NM_001432
Sox7_2.0x_Union.txt	12017	NM_178517	PIGW	284098	C9JLC8 Q7Z7B1	22499212	NM_178517
Sox7_2.0x_Union.txt	12017	NM_173490	TMEM171	134285	Q8WVE6	22499304	NM_001161342
Sox7_2.0x_Union.txt	12017	NM_001102445	RGS4	5999	B1APZ3 B4DUX1 E9PR32 E9PS05 P49798 Q59GU0	22499479	NM_001102445
Sox7_2.0x_Union.txt	12017	BU617001	RGS4	5999	B1APZ3 B4DUX1 E9PR32 E9PS05 P49798 Q59GU0	22499480	NM_001102445
Sox7_2.0x_Union.txt	12017	BC063611	PELI1	57162	Q53T26 Q96FA3	22499546	NM_020651
Sox7_2.0x_Union.txt	12017	NM_005655	KLF10	7071	Q13118	22499554	NM_001032282
Sox7_2.0x_Union.txt	12017	BI492527	MAF	4094	H3BP11 O75444 Q71A33 Q8IX32	22499574	NM_001031804
Sox7_2.0x_Union.txt	12017	BC126411	ITGB4	3691	B4E3N0 B7ZLD5 B7ZLD8 H0Y6G1 P16144 Q0VF97 Q2VP98 Q59H46	22499584	NM_000213
Sox7_2.0x_Union.txt	12017	NM_000067	CA2	760	P00918	22499601	NM_000067
Sox7_2.0x_Union.txt	12017	NM_014950	ZBTB1	22890	G3V2I8 G3V3N0 G3V447 Q5UW39 Q9Y2K1	22499664	NM_001123329
Sox7_2.0x_Union.txt	12017	BC069999	IL7R	3575	B8YG18 D6RCR9 D6RDM4 D6RG28 D6RGV2 D9N160 H0Y8G3 H0YA41 P16871	22499673	NM_002185
Sox7_2.0x_Union.txt	12017	NM_144975	SLFN5	162394	B4E0B1 B4E128 Q08AF3	22499699	NM_144975
Sox7_2.0x_Union.txt	12017	AK303299	SLFN5	162394	B4E0B1 B4E128 Q08AF3	22499700	NM_144975
Sox7_2.0x_Union.txt	12017	AK000990	UACA	55075	B7ZKM6 B7ZKM7 F5H2B9 G3XAG2 H0YMI1 H0YN48 H0YNH8 Q05DB3 Q8NDD7 Q96NH6 Q9BZF9	22499738	NM_001008224
Sox7_2.0x_Union.txt	12017	NM_000379	XDH	7498	P47989	22499950	NM_000379
Sox7_2.0x_Union.txt	12017	U06117	XDH	7498	P47989	22499951	NM_000379
Sox7_2.0x_Union.txt	12017	NM_001130058	SLC44A5	204962	B7Z470 B7Z473 B7Z5Y4 F5GYS0 H0YGC8 Q8NCS7	22499978	NM_001130058
Sox7_2.0x_Union.txt	12017	NM_005604	POU3F2	5454	B3KTH8 P20265	22500006	NM_005604
Sox7_2.0x_Union.txt	12017	NM_005627	SGK1	6446	B7Z1G1 B7Z325 E9PJN2 E9PP33 E9PR89 H0YCJ3 O00141 Q7Z3I4	22500184	NM_001143676
Sox7_2.0x_Union.txt	12017	NM_001709	BDNF	627	E9PMP3 P23560 Q304R1 Q6T2C9 Q6YNR1 Q969N8 Q96TC2	22500237	NM_001143805
Sox7_2.0x_Union.txt	12017	NM_004396	DDX5	1655	B4DLW8 B4DN41 B4DNG2 B5BUE6 E7ETL9 P17844	22500284	NM_004396
Sox7_2.0x_Union.txt	12017	AK055674	MAP2	4133	A8K5Y1 A8MZ31 E7EV03 H7BZB9 P11137 Q16296 Q59FX9 Q6NYC5	22500318	NM_001039538
Sox7_2.0x_Union.txt	12017	NM_014210	EVI2A	2123	P22794	22500327	NM_001003927
Sox7_2.0x_Union.txt	12017	BE876695	RRP15	51018	A0JLN3 A8K201 Q9Y3B9	22500391	NM_016052
Sox7_2.0x_Union.txt	12017	AF019386	HS3ST1	9957	E9PDE3 O14792 Q05CH3	22500399	NM_005114
Sox7_2.0x_Union.txt	12017	AK125072	SLC22A15	55356	B3KWH0 Q8IZD6	22500441	NM_018420
Sox7_2.0x_Union.txt	12017	AY485530	PTGFR	5737	F2Z2Z6 P43088	22500665	NM_000959
Sox7_2.0x_Union.txt	12017	NM_153267	MAMDC2	256691	B4E1Y9 B4E320 P83731 Q7Z304	22500904	NM_153267
Sox7_2.0x_Union.txt	12017	NM_001098478	HLA-F	3134	B3KUD8 B4DQ99 B4DT81 B4DYG3 B4E156 B7Z760 D0EV57 H0Y4C2 H0Y5J2 H0Y5Q6 H0Y7Q7 H0Y7W0 H0Y842 P30511 Q6ZUW0 Q861E9 Q861F0	22501016	NM_001098478
Sox7_2.0x_Union.txt	12017	NM_000358	LOC100652886 /// LOC100653157 /// TGFBI	100652886	B9ZVW9 D6RBX4 D6RHG5 G8JLA8 H0Y8L3 H0Y8M8 H0Y9D7 H0YAB8 H0YAH8 Q15582 Q53GU8	22501034	NM_000358
Sox7_2.0x_Union.txt	12017	NM_000358	LOC100652886 /// LOC100653157 /// TGFBI	100652886	B9ZVW9 D6RBX4 D6RHG5 G8JLA8 H0Y8L3 H0Y8M8 H0Y9D7 H0YAB8 H0YAH8 Q15582 Q53GU8	22501035	NM_000358
Sox7_2.0x_Union.txt	12017	NM_000358	LOC100652886 /// LOC100653157 /// TGFBI	100652886	B9ZVW9 D6RBX4 D6RHG5 G8JLA8 H0Y8L3 H0Y8M8 H0Y9D7 H0YAB8 H0YAH8 Q15582 Q53GU8	22501036	NM_000358
Sox7_2.0x_Union.txt	12017	BC039196	SLC2A14 /// SLC2A3	144195	B7Z5A7 B7Z5J8 B7Z844 B7Z966 B7ZAC3 F5GXP7 F5GXP8 F5GXT4 F5GYR5 F5GYX0 F5H076 F5H2H8 F5H3J0 F5H565 F5H5Q3 F5H5V7 F5H6F6 F5H7N2 P11169 Q59F54 Q8TDB8	22501143	NM_006931
Sox7_2.0x_Union.txt	12017	BC043216	VSIG1	340547	A8K8V7 C9J4P2 C9JY48 Q86XK7	22501341	NM_001170553
Sox7_2.0x_Union.txt	12017	AK021827	SLC16A9	220963	Q7RTY1	22501425	NM_194298
Sox7_2.0x_Union.txt	12017	NM_003811	TNFSF9	8744	B2RA14 P41273	22501626	NM_003811
Sox7_2.0x_Union.txt	12017	NM_003877	SOCS2	8835	A8K3D1 B4DMW5 B5BU82 F8VRV3 F8VS53 F8VU91 O14508	22501634	NM_001270467
Sox7_2.0x_Union.txt	12017	NM_001145671	SORBS2	8470	B3KPQ7 B3KPU4 B7Z1G5 B7Z3D7 B7Z997 C9IZ89 C9IZT7 C9J348 C9J372 C9J3W4 C9J4K2 C9J4Z9 C9J620 C9J7Q5 C9J8E3 C9J9D3 C9JBB0 C9JBR8 C9JC90 C9JDX2 C9JEA9 C9JFS9 C9JG84 C9JI79 C9JKV9 C9JL62 C9JLD6 C9JM25 C9JN77 C9JWC3 C9JZ60 E9PAS5 E9PAW4 G3XAI0 H7BXR3 H7BXR4 H7BZK1 H7BZX1 H7C1R7 O94875 Q96P70	22502056	NM_001145670
Sox7_2.0x_Union.txt	12017	BC011883	SORBS2	8470	B3KPQ7 B3KPU4 B7Z1G5 B7Z3D7 B7Z997 C9IZ89 C9IZT7 C9J348 C9J372 C9J3W4 C9J4K2 C9J4Z9 C9J620 C9J7Q5 C9J8E3 C9J9D3 C9JBB0 C9JBR8 C9JC90 C9JDX2 C9JEA9 C9JFS9 C9JG84 C9JI79 C9JKV9 C9JL62 C9JLD6 C9JM25 C9JN77 C9JWC3 C9JZ60 E9PAS5 E9PAW4 G3XAI0 H7BXR3 H7BXR4 H7BZK1 H7BZX1 H7C1R7 O94875	22502057	NM_001145670
Sox7_2.0x_Union.txt	12017	BC011883	SORBS2	8470	B3KPQ7 B3KPU4 B7Z1G5 B7Z3D7 B7Z997 C9IZ89 C9IZT7 C9J348 C9J372 C9J3W4 C9J4K2 C9J4Z9 C9J620 C9J7Q5 C9J8E3 C9J9D3 C9JBB0 C9JBR8 C9JC90 C9JDX2 C9JEA9 C9JFS9 C9JG84 C9JI79 C9JKV9 C9JL62 C9JLD6 C9JM25 C9JN77 C9JWC3 C9JZ60 E9PAS5 E9PAW4 G3XAI0 H7BXR3 H7BXR4 H7BZK1 H7BZX1 H7C1R7 O94875	22502058	NM_001145670
Sox7_2.0x_Union.txt	12017	NM_144652	LETM2	137994	A8K1M9 B4DY93 B7Z7T4 E5RJN4 E5RK40 E9PIC7 E9PMA4 E9PN52 H0YCZ8 Q2VYF4	22502062	NM_001199659
Sox7_2.0x_Union.txt	12017	NM_178561	CTAGE6P	340307	Q86UF2	22502255	NM_178561
Sox7_2.0x_Union.txt	12017	NM_206966	C5orf46	389336	Q6UWT4	22502353	NM_206966
Sox7_2.0x_Union.txt	12017	AK289853	BDNF	627	E9PMP3 P23560 Q304R1 Q6T2C9 Q6YNR1 Q969N8 Q96TC2	22502388	NM_001143805
Sox7_2.0x_Union.txt	12017	NM_022475	HHIP	64399	A8K734 Q96QV1	22502572	NM_022475
Sox7_2.0x_Union.txt	12017	AK074554	ITSN1	6453	A7XZY7 A7Y322 A8CTX8 A8CTY3 A8CTY7 A8CTZ0 A8D7D0 A8DCP3 A8W608 B4DTM2 C9J1A4 C9JQZ7 C9JXS9 D6PAV9 D6PAW0 D6PAW2 E7ERJ0 E7ERJ1 E9PD98 F5H153 F8W7L8 F8W7U0 H0Y3G5 H0Y523 H0Y6W3 H0Y7J7 H7C3F1 H7C429 Q0PW94 Q0PW95 Q0PW96 Q0PW97 Q14BD3 Q14BD4 Q15811 Q20BK3 Q2LAE2 Q6GMY7 Q6J1T1 Q6J1T2 Q6J333 Q6J334 Q6PD56 Q7Z328 Q7Z452 Q7Z	22502627	NM_001001132
Sox7_2.0x_Union.txt	12017	AL832345	PRKCE	5581	B2R9M7 C9JR22 E9PBI2 Q02156	22502743	NM_005400
Sox7_2.0x_Union.txt	12017	AK126026	SLC2A14 /// SLC2A3	144195	B7Z5A7 B7Z5J8 B7Z844 B7Z966 B7ZAC3 F5GXP7 F5GXP8 F5GXT4 F5GYR5 F5GYX0 F5H076 F5H2H8 F5H3J0 F5H565 F5H5Q3 F5H5V7 F5H6F6 F5H7N2 P11169 Q59F54 Q8TDB8	22503041	NM_006931
Sox7_2.0x_Union.txt	12017	NM_031845	MAP2	4133	A8K5Y1 A8MZ31 E7EV03 H7BZB9 P11137 Q16296 Q59FX9 Q6NYC5	22503045	NM_001039538
Sox7_2.0x_Union.txt	12017	BC136601	CADPS2	93664	B3KNS2 B3KX29 B7ZM57 C9IYE1 E7EMZ7 F5H4L3 F8W8P5 F8WDX1 H0Y8B5 H7BYR4 Q86UW7	22503148	NM_001009571
Sox7_2.0x_Union.txt	12017	BC051303	JDP2	122953	H0YKE4 Q8WYK2	22503150	NM_001135047
Sox7_2.0x_Union.txt	12017	NM_145032	FBXL13	222235	C9JI88 E7ERH8 H7BXR1 Q4G192 Q8N1P0 Q8NEE6	22503518	NM_001111038
Sox7_2.0x_Union.txt	12017	NM_153228	ANKFN1	162282	H3BM45 I3L0N6 Q8N957	22503608	NM_153228
Sox7_2.0x_Union.txt	12017	BC146818	CTAGE15P /// CTAGE4 /// CTAGE6P /// CTAGE8 /// CTAGE9	100128553	A4FU28 A6H8Z8 P0CG41 Q86UF2 Q8IX94	22503612	NM_001008747
Sox7_2.0x_Union.txt	12017	NM_032813	TMTC4	84899	A8K2T0 B7Z666 Q5T4D3	22503782	NM_001079669
Sox7_2.0x_Union.txt	12017	NM_181873	MTMR11	10903	A4FU01 B4E3F0 F8W8W0	22503874	NM_001145862
Sox7_2.0x_Union.txt	12017	AK298688	SGK1	6446	B7Z1G1 B7Z325 E9PJN2 E9PP33 E9PR89 H0YCJ3 O00141 Q7Z3I4	22504235	NM_001143676
Sox7_2.0x_Union.txt	12017	NM_001143678	SGK1	6446	B7Z1G1 B7Z325 E9PJN2 E9PP33 E9PR89 H0YCJ3 O00141 Q7Z3I4	22504236	NM_001143676
Sox7_2.0x_Union.txt	12017	AF288207	CARS	833	A8K067 A8MVQ3 B4DI19 B4DKY1 B4DPV7 C9JLN0 E9PLP0 E9PPK8 E9PRS8 P49589 Q53HG6 Q59HE5	22504243	NM_001014437
Sox7_2.0x_Union.txt	12017	AF288207	CARS	833	A8K067 A8MVQ3 B4DI19 B4DKY1 B4DPV7 C9JLN0 E9PLP0 E9PPK8 E9PRS8 P49589 Q53HG6 Q59HE5	22504244	NM_001014437
Sox7_2.0x_Union.txt	12017	NM_005168	RND3	390	B2R838 B4DNQ0 B4DSG7 E9PFH1 P61587 Q53RZ3 Q6FGN7 Q6FGR9	22504246	NM_001254738
Sox7_2.0x_Union.txt	12017	NM_152737	RNF182	221687	C9IZ30 C9JAJ3 C9JAK6 C9JVS8 Q8N6D2	22504260	NM_001165032
Sox7_2.0x_Union.txt	12017	NM_017737	FNBP1L	54874	B4DKY5 B4DSI7 B4DSW1 B7Z9L6 Q5T0N5	22504317	NM_001024948
Sox7_2.0x_Union.txt	12017	AK290090	SPP1	6696	A6XMV6 B7Z351 C4B6Q2 C9JXD2 D6R9C5 F2YBS4 F2YBS5 F2YQ21 P10451 Q3LGB0	22504429	NM_000582
Sox7_2.0x_Union.txt	12017	AK290090	SPP1	6696	A6XMV6 B7Z351 C4B6Q2 C9JXD2 D6R9C5 F2YBS4 F2YBS5 F2YQ21 P10451 Q3LGB0	22504430	NM_000582
Sox7_2.0x_Union.txt	12017	NM_005302	GPR37	2861	A4D0Y6 O15354	22504478	NM_005302
Sox7_2.0x_Union.txt	12017	NM_001005377	PLAUR	5329	Q03405	22504539	NM_001005376
Sox7_2.0x_Union.txt	12017	NM_199327	SPRY1	10252	D6REX7 D6RHD2 D6RIE6 O43609	22504559	NM_001258038
Sox7_2.0x_Union.txt	12017	BC104808	RBM24	221662	A8KAI7 B7Z6B4 B7Z6B7 E9PAY4 H0Y8S7 H0YA61 Q9BX46	22504638	NM_001143941
Sox7_2.0x_Union.txt	12017	BC104808	RBM24	221662	A8KAI7 B7Z6B4 B7Z6B7 E9PAY4 H0Y8S7 H0YA61 Q9BX46	22504639	NM_001143941
Sox7_2.0x_Union.txt	12017	M27281	VEGFA	7422	A2A2V4 H0Y407 H3BLW7 H3BLW8 P15692 Q59FH5 Q6WZM0 Q96FD9	22504900	NM_001025366
Sox7_2.0x_Union.txt	12017	NM_020711	ERMN	57471	B4DIZ1 B4DKB4 B8ZZ94 C9J6B4 C9J8X3 C9JN04 F8WAQ2 Q8TAM6	22505501	NM_001009959
Sox7_2.0x_Union.txt	12017	BC026345	ERMN	57471	B4DIZ1 B4DKB4 B8ZZ94 C9J6B4 C9J8X3 C9JN04 F8WAQ2 Q8TAM6	22505502	NM_001009959
Sox7_2.0x_Union.txt	12017	L01639	CXCR4	7852	P61073 Q5MIL4	22505580	NM_001008540
Sox7_2.0x_Union.txt	12017	AA827918	RASSF2	9770	P50749 Q8IZA5	22505718	NM_014737
Sox7_2.0x_Union.txt	12017	CR590690	FAM84B	157638	A8K9V9 Q96KN1	22505741	NM_174911
Sox7_2.0x_Union.txt	12017	AK291698	VWA5A	4013	A8K6N3 B2RC43 B4DHS6 G3V152 O00534	22505744	NM_001130142
Sox7_2.0x_Union.txt	12017	AK095628	MLL3 /// TPTE	58508	A7MBM6 C9J4Z5 C9JUN1 H0Y765 H0YMU7 H0YNL4 H7BXY7 H7BY37 H7C212 H7C2V8 P56180 Q6N019 Q8NEZ4	22505895	NM_021230
Sox7_2.0x_Union.txt	12017	AK095628	MLL3	58508	A7MBM6 C9J4Z5 H0Y765 H0YMU7 H0YNL4 H7BY37 H7C212 H7C2V8 Q6N019 Q8NEZ4	22505896	NM_021230
Sox7_2.0x_Union.txt	12017	AK074243	TMEM87B	84910	H7C0B3 H7C1G1 Q96K49	22505956	NM_032824
Sox7_2.0x_Union.txt	12017	BQ000301	NAB1	4664	A8K8T1 B4DKG1 B8ZZS2 C9J3V0 C9JFF6 C9JID4 C9JJ42 C9JL92 F8W8J7 H0Y4C5 Q13506	22505961	NM_005966
Sox7_2.0x_Union.txt	12017	AK074930	ATP10D	57205	H0Y8M7 Q6PEW3 Q9P241	22505975	NM_020453
Sox7_2.0x_Union.txt	12017	AF165281	ABCA1	19	B1AMI1 B1AMI2 B2RUU2 B7XCW9 O95477 Q9NP93 Q9NS76	22505989	NM_005502
Sox7_2.0x_Union.txt	12017	CA944479	ST8SIA4	7903	E5RFK3 G3V104 Q8N1F4 Q92187	22506007	NM_005668
Sox7_2.0x_Union.txt	12017	BM969177	ST8SIA4	7903	E5RFK3 G3V104 Q8N1F4 Q92187	22506008	NM_005668
Sox7_2.0x_Union.txt	12017	AK316350	FN1	2335	A6YID2 A6YID3 A6YID4 A6YID5 A6YID6 A6YID7 B4DN21 B4DTH2 B4DTK1 B4DU16 B7ZLE5 B7ZLF0 E7ERA1 E9PE77 E9PG29 F8W7G7 H0Y4K8 H0Y7Z1 O95608 O95617 P02751 Q14328 Q564H7 Q59G22 Q5CZ99 Q68CX6 Q6MZF4 Q6MZM7 Q6N084 Q6PJE5 Q6STG2 Q7L553 Q7Z391 Q9H382 Q9UQS6	22506020	NM_002026
Sox7_2.0x_Union.txt	12017	AK316350	FN1	2335	A6YID2 A6YID3 A6YID4 A6YID5 A6YID6 A6YID7 B4DN21 B4DTH2 B4DTK1 B4DU16 B7ZLE5 B7ZLF0 E7ERA1 E9PE77 E9PG29 F8W7G7 H0Y4K8 H0Y7Z1 O95608 O95617 P02751 Q14328 Q564H7 Q59G22 Q5CZ99 Q68CX6 Q6MZF4 Q6MZM7 Q6N084 Q6PJE5 Q6STG2 Q7L553 Q7Z391 Q9H382 Q9UQS6	22506021	NM_002026
Sox7_2.0x_Union.txt	12017	AK316350	FN1	2335	A6YID2 A6YID3 A6YID4 A6YID5 A6YID6 A6YID7 B4DN21 B4DTH2 B4DTK1 B4DU16 B7ZLE5 B7ZLF0 E7ERA1 E9PE77 E9PG29 F8W7G7 H0Y4K8 H0Y7Z1 O95608 O95617 P02751 Q14328 Q564H7 Q59G22 Q5CZ99 Q68CX6 Q6MZF4 Q6MZM7 Q6N084 Q6PJE5 Q6STG2 Q7L553 Q7Z391 Q9H382 Q9UQS6	22506022	NM_002026
Sox7_2.0x_Union.txt	12017	AI122877	FAM107B	83641	C9J3Q3 C9J6N5 C9J6Y8 C9JP05 C9JQ40 C9JW51 C9JYP1 F8WCJ2 F8WDH7 Q9H098	22506173	NM_031453
Sox7_2.0x_Union.txt	12017	AK126968	CSNK1G1	53944	B7Z7D1 Q8IXA3 Q9H5M4 Q9HCP0	22506217	NM_022048
Sox7_2.0x_Union.txt	12017	CD366976	SVIL	6840	B4DXQ4 B4E3H1 B4E3N7 F5GXV0 F5GY75 F5H2Q5 O95425 Q569J5 Q63HL8 Q659E9	22506232	NM_003174
Sox7_2.0x_Union.txt	12017	NM_001007139	IGF2 /// INS-IGF2	3481	A6XGL2 A8K6C9 C9JAF2 E3UN45 E3UN46 F6MZK5 P01308 P01344 P09565	22506273	NM_000612
Sox7_2.0x_Union.txt	12017	BC117142	LY6K	54742	E5RGJ8 G3V116 H0YB07 Q17RY6	22506284	NM_001160354
Sox7_2.0x_Union.txt	12017	U58855	GUCY1A3	2982	B3KU69 D6RDW3 D6RF78 Q02108 Q6PJR4	22506316	NM_000856
Sox7_2.0x_Union.txt	12017	BQ775757	ODZ2	57451	B4DDN3 B4DY80 F5H2D1 F8VNQ3 G3CAS7 G3CAS8 G3V106 G8BLJ6 H7BYZ1 Q9NT68	22506343	NM_001080428
Sox7_2.0x_Union.txt	12017	NM_001042475	CEP85L	387119	A2A3P3 B4DYT2 Q3ZCQ5 Q5SZL2	22506374	NM_001042475
Sox7_2.0x_Union.txt	12017	AF077298	PRSS12	8492	P56730 Q96I80	22506376	NM_003619
Sox7_2.0x_Union.txt	12017	M13361	FGF1	2246	A8K147 B5MCF4 C9JDC5 C9JUP6 P05230 Q16089 Q9UBK1	22506445	NM_000800
Sox7_2.0x_Union.txt	12017	BC017423	MIER1	57708	F8W8K3 Q08AE0 Q5TAD1 Q5TAD2 Q5TAD4 Q6NXT7 Q8N108	22506455	NM_001077700
Sox7_2.0x_Union.txt	12017	BU686994	NUAK1	9891	O60285	22506458	NM_014840
Sox7_2.0x_Union.txt	12017	BU686994	NUAK1	9891	O60285	22506459	NM_014840
Sox7_2.0x_Union.txt	12017	AK055642	CAMK2D	817	B7Z2B0 D6R938 E9PBG7 E9PF82 H0Y9J2 Q13557 Q4G1A8 Q92991	22506549	NM_001221
Sox7_2.0x_Union.txt	12017	AK295432	MSMO1	6307	A8MYF6 D6R952 D6RDP9 D6REA2 Q15800	22506578	NM_001017369
Sox7_2.0x_Union.txt	12017	BQ018715	TMCC1	23023	A8K5Y3 B4DE04 D6RBT7 D6RH19 E9PC87 O94876 Q6N039 Q8N4H2	22506582	NM_001017395
Sox7_2.0x_Union.txt	12017	NM_015376	RASGRP3	25780	A8KAB8 C9IYA5 C9J9C9 C9JSS2 C9JWP0 C9K0P4 D6W583 H7C352 Q53SD7 Q8IV61	22506626	NM_001139488
Sox7_2.0x_Union.txt	12017	NM_020663	RHOJ	57381	G3V476 G3V4H1 Q59G91 Q7Z513 Q9H4E5	22506668	NM_020663
Sox7_2.0x_Union.txt	12017	J03802	PTHLH	5744	P12272 Q53XY9	22506731	NM_002820
Sox7_2.0x_Union.txt	12017	BC069353	HAS2	3037	B4DN16 E7ETI9 Q92819	22506797	NM_005328
Sox7_2.0x_Union.txt	12017	U54804	HAS2	3037	B4DN16 E7ETI9 Q92819	22506798	NM_005328
Sox7_2.0x_Union.txt	12017	AK225812	SORBS2	8470	B3KPQ7 B3KPU4 B7Z1G5 B7Z3D7 B7Z997 C9IZ89 C9IZT7 C9J348 C9J372 C9J3W4 C9J4K2 C9J4Z9 C9J620 C9J7Q5 C9J8E3 C9J9D3 C9JBB0 C9JBR8 C9JC90 C9JDX2 C9JEA9 C9JFS9 C9JG84 C9JI79 C9JKV9 C9JL62 C9JLD6 C9JM25 C9JN77 C9JWC3 C9JZ60 E9PAS5 E9PAW4 G3XAI0 H7BXR3 H7BXR4 H7BZK1 H7BZX1 H7C1R7 O94875	22506812	NM_001145670
Sox7_2.0x_Union.txt	12017	NM_002925	RGS10	6001	O43665	22506861	NM_001005339
Sox7_2.0x_Union.txt	12017	M99435	TLE1	7088	A6NFH2 B4DEF9 B4E345 Q04724 Q59EF7	22506900	NM_005077
Sox7_2.0x_Union.txt	12017	NM_058237	PPP4R4	57718	B4E186 G3V422 G3V431 G3V516 Q6NUP7	22506911	NM_020958
Sox7_2.0x_Union.txt	12017	AK291830	NOX4	50507	B3KQ17 B7Z520 B7Z523 B7Z529 B7Z535 C9J897 E7EMD7 E9PI95 E9PMY6 E9PPP2 E9PR43 Q9NPH5	22506961	NM_001143836
Sox7_2.0x_Union.txt	12017	AF004021	PTGFR	5737	F2Z2Z6 P43088	22507072	NM_000959
Sox7_2.0x_Union.txt	12017	AK316546	SLC1A5	6510	B4DE27 B4DR77 B4DWS4 B7ZB81 E9PC01 Q15758 Q59ES3 Q71UA6	22507200	NM_001145144
Sox7_2.0x_Union.txt	12017	AY359239	FBXL13	222235	C9JI88 E7ERH8 H7BXR1 Q4G192 Q8N1P0 Q8NEE6	22507290	NM_001111038
Sox7_2.0x_Union.txt	12017	NM_206921	CEP85L	387119	A2A3P3 B4DYT2 Q3ZCQ5 Q5SZL2	22507292	NM_001042475
Sox7_2.0x_Union.txt	12017	NM_001145099	SLC2A6	11182	B4DH85 F2Z2F6 F2Z3K7 Q9UGQ3	22507443	NM_001145099
Sox7_2.0x_Union.txt	12017	BC007093	CCNG1	900	B4DLW7 D6RCC5 D6RD30 D6RGX3 E7ERZ1 P51959 Q7Z396	22507466	NM_004060
Sox7_2.0x_Union.txt	12017	AK292418	MSMO1	6307	A8MYF6 D6R952 D6RDP9 D6REA2 Q15800	22507498	NM_001017369
Sox7_2.0x_Union.txt	12017	AY634685	FHL2	2274	E9PKF4 Q14192 Q2TSB7 Q2XQU9 Q5TM15 Q6I9R8	22507591	NM_001039492
Sox7_2.0x_Union.txt	12017	AY634685	FHL2	2274	E9PKF4 I0CE67 Q14192 Q2TSB7 Q2XQU9 Q5TM15 Q6I9R8	22507592	NM_001039492
Sox7_2.0x_Union.txt	12017	NM_001077427	LYPD1	116372	B3KV24 H7BXW6 O43194 Q8IXM0 Q8N2G4	22507608	NM_001077427
Sox7_2.0x_Union.txt	12017	BC032866	EIF5	1983	B4DEN3 H0YK11 H0YK29 H0YLZ1 H0YM54 H0YMJ8 H0YN40 P55010 Q05DF3 Q32Q19 Q6IBU0	22507710	NM_001969
Sox7_2.0x_Union.txt	12017	AK296461	SORBS2	8470	B3KPQ7 B3KPU4 B7Z1G5 B7Z3D7 B7Z997 C9IZ89 C9IZT7 C9J348 C9J372 C9J3W4 C9J4K2 C9J4Z9 C9J620 C9J7Q5 C9J8E3 C9J9D3 C9JBB0 C9JBR8 C9JC90 C9JDX2 C9JEA9 C9JFS9 C9JG84 C9JI79 C9JKV9 C9JL62 C9JLD6 C9JM25 C9JN77 C9JWC3 C9JZ60 E9PAS5 E9PAW4 G3XAI0 H7BXR3 H7BXR4 H7BZK1 H7BZX1 H7C1R7 O94875	22507747	NM_001145670
Sox7_2.0x_Union.txt	12017	AK296461	SORBS2	8470	B3KPQ7 B3KPU4 B7Z1G5 B7Z3D7 B7Z997 C9IZ89 C9IZT7 C9J348 C9J372 C9J3W4 C9J4K2 C9J4Z9 C9J620 C9J7Q5 C9J8E3 C9J9D3 C9JBB0 C9JBR8 C9JC90 C9JDX2 C9JEA9 C9JFS9 C9JG84 C9JI79 C9JKV9 C9JL62 C9JLD6 C9JM25 C9JN77 C9JWC3 C9JZ60 E9PAS5 E9PAW4 G3XAI0 H7BXR3 H7BXR4 H7BZK1 H7BZX1 H7C1R7 O94875	22507748	NM_001145670
Sox7_2.0x_Union.txt	12017	NM_001128305	PLSCR4	57088	A8K9V0 B2R720 C9J3P9 C9J664 C9J6E1 C9J916 C9JNW2 E9PHR9 Q9NRQ2	22507801	NM_001128304
Sox7_2.0x_Union.txt	12017	D37931	RNASE4	6038	P34096 Q53XB4	22507933	NM_002937
Sox7_2.0x_Union.txt	12017	AF113132	PSAT1	29968	B4DHQ3 B4DHX7 Q9Y617	22507965	NM_021154
Sox7_2.0x_Union.txt	12017	NM_001135820	TMEM2	23670	B3KNL9 B4DTX3 B4E1B9 F5GZC1 F5H6B2 H3BLX9 H3BLY0 Q9UHN6	22508021	NM_001135820
Sox7_2.0x_Union.txt	12017	NM_001135820	TMEM2	23670	B3KNL9 B4DTX3 B4E1B9 F5GZC1 F5H6B2 H3BLX9 H3BLY0 Q9UHN6	22508022	NM_001135820
Sox7_2.0x_Union.txt	12017	EF054877	RGS4	5999	B1APZ3 B4DUX1 E9PR32 E9PS05 P49798 Q59GU0	22508058	NM_001102445
Sox7_2.0x_Union.txt	12017	NM_001122674	ABCD3	5825	B4DL07 B4DZ22 E7EUE1 F5GYC1 P28288	22508078	NM_001122674
Sox7_2.0x_Union.txt	12017	NM_152748	KIAA1324L	222223	A8MWY0 B4E116 C9JA41 C9JFK7 F1LLU5 H7BYL8 H7BZ34 H7C2N5	22508288	NM_001142749
Sox7_2.0x_Union.txt	12017	NM_001085486	SEPP1	6414	B4E0P7 D6REX5 D6RIS9 P49908 Q4G0S7	22508360	NM_001085486
Sox7_2.0x_Union.txt	12017	AK297723	MMP1	4312	A5GZ69 B4DN15 B4DW26 P03956 Q53FK3 Q53G75 Q53G95 Q53G96 Q53G97 Q5TZP0 Q96DZ4	22508383	NM_001145938
Sox7_2.0x_Union.txt	12017	AF022375	VEGFA	7422	H3BLW7 H3BLW8 P15692 Q59FH5 Q6WZM0 Q96FD9	22508450	NM_001025366
Sox7_2.0x_Union.txt	12017	M32977	VEGFA	7422	A2A2V4 H0Y407 H3BLW8 P15692 Q59FH5 Q6WZM0 Q96FD9	22508451	NM_001025366
Sox7_2.0x_Union.txt	12017	NM_153742	CTH	1491	B4E1R2 E9PDV0 P32929	22508764	NM_001190463
Sox7_2.0x_Union.txt	12017	AY702027	CHAC1	79094	Q9BUX1	22508773	NM_001142776
Sox7_2.0x_Union.txt	12017	NM_001040665	STEAP2	261729	B2RCC7 B3KS24 B5MC02 C9JHX5 C9JLP2 G5E9C6 Q6YPB1 Q6YPB2 Q8NFT2	22508909	NM_001040665
Sox7_2.0x_Union.txt	12017	CR541824	SCG5	6447	C9J650 C9JNY7 H7C4X7 P05408 Q6FHD0	22509184	NM_001144757
Sox7_2.0x_Union.txt	12017	CR456952	PLAUR	5329	Q03405	22509304	NM_001005376
Sox7_2.0x_Union.txt	12017	CR456952	PLAUR	5329	Q03405	22509305	NM_001005376
Sox7_2.0x_Union.txt	12017	M60334	HLA-DRA	3122	B0UXD8 B4DLJ8 B4DVL4 B4DW37 B4E2U4 F5GZ59 F8W032 F8W0P2 O19720 P01903 Q29868 Q30118 Q5SP06	22509336	NM_019111
Sox7_2.0x_Union.txt	12017	AW471117	RLF	6018	F5H2M5 Q13129 Q59GL0	22509350	NM_012421
Sox7_2.0x_Union.txt	12017	AK027274	MARCKS	4082	P29966 Q05C82 Q6NVI1	22509434	NM_002356
Sox7_2.0x_Union.txt	12017	AK295222	PSAT1	29968	B4DHQ3 B4DHX7 Q9Y617	22509477	NM_021154
Sox7_2.0x_Union.txt	12017	AK295222	PSAT1	29968	B4DHQ3 B4DHX7 Q9Y617	22509478	NM_021154
Sox7_2.0x_Union.txt	12017	AK295222	PSAT1	29968	B4DHQ3 B4DHX7 Q9Y617	22509479	NM_021154
Sox7_2.0x_Union.txt	12017	AY029180	PLAUR	5329	Q03405	22509548	NM_001005376
Sox7_2.0x_Union.txt	12017	AY029180	PLAUR	5329	Q03405	22509549	NM_001005376
Sox7_2.0x_Union.txt	12017	AK291536	CEBPB	1051	P17676	22509563	NM_005194
Sox7_2.0x_Union.txt	12017	AK292851	NAMPT	10135	B7Z8W6 C9JF35 C9JG65 F5H246 P43490 Q5SYT8 Q658Z1	22509597	NM_005746
Sox7_2.0x_Union.txt	12017	BC105109	CEBPD	1052	P49716 Q504X4	22509621	NM_005195
Sox7_2.0x_Union.txt	12017	BC105109	CEBPD	1052	P49716 Q504X4	22509622	NM_005195
Sox7_2.0x_Union.txt	12017	CR536531	LPXN	9404	B4DVI1 B7Z5P7 E9PNX9 O60711	22509655	NM_001143995
Sox7_2.0x_Union.txt	12017	CF529882	TLR4	7099	D1CS53 O00206	22509683	NM_003266
Sox7_2.0x_Union.txt	12017	CR616411	BCCIP	56647	B4DUS0 B4E318 Q9P287	22509990	NM_016567
Sox7_2.0x_Union.txt	12017	CR596199	LPHN2	23266	B1ALU1 B1ALU3 B3KVU1 H0Y3V3 H0Y5C0 O95490	22510054	NM_012302
Sox7_2.0x_Union.txt	12017	BQ128199	CPE	1363	B3KXD3 B4DFN4 C9JE88 D6R930 D6RF88 H0YAM0 P16870	22510063	NM_001873
Sox7_2.0x_Union.txt	12017	CA416531	KLF10	7071	Q13118	22510168	NM_001032282
Sox7_2.0x_Union.txt	12017	CR598109	TNFSF10	8743	H7C246 P50591 Q6IBA9 Q6JSD9	22510216	NM_001190942
Sox7_2.0x_Union.txt	12017	AU134691	TNFSF10	8743	H7C246 P50591 Q6IBA9 Q6JSD9	22510217	NM_001190942
Sox7_2.0x_Union.txt	12017	BM682674	MAB21L1	4081	B2R805 F1T0A2 Q13394	22510256	NM_005584
Sox7_2.0x_Union.txt	12017	BE464297	S1PR1	1901	B4DLH9 P21453	22510301	NM_001400
Sox7_2.0x_Union.txt	12017	BE464297	S1PR1	1901	B4DLH9 P21453	22510302	NM_001400
Sox7_2.0x_Union.txt	12017	AB033089	FSTL5	56884	E9PCP6 F8VZ90 Q8N475	22510312	NM_001128427
Sox7_2.0x_Union.txt	12017	BM979794	ST3GAL6	10402	B3KMI1 F2Z2F4 F8W6U0 F8WC98 Q9Y274	22510325	NM_006100
Sox7_2.0x_Union.txt	12017	AK095647	PLCXD2	257068	Q0VAA5	22510327	NM_001134478
Sox7_2.0x_Union.txt	12017	BU730835	CFH /// CFHR1	3075	A8K5T0 B1AKG0 C9JYL1 F8WDX4 P08603 Q03591 Q14006 Q5TFM2	22510332	NM_000186
Sox7_2.0x_Union.txt	12017	BU730835	CFH	3075	A8K5T0 C9JYL1 F8WDX4 P08603 Q03591 Q14006 Q5TFM2	22510333	NM_000186
Sox7_2.0x_Union.txt	12017	CR592899	CTHRC1	115908	B4DTM1 E5RK99 E7EVQ5 F8WAA6 G3V141 Q96CG8	22510342	NM_001256099
Sox7_2.0x_Union.txt	12017	AI537264	PLSCR1	5359	B4DTE8 C9J0H3 C9J7K9 C9J9P4 C9JE06 C9JSI9 F2Z3F2 H7C5I5 O15162 Q8WVK1	22510397	NM_021105
Sox7_2.0x_Union.txt	12017	AL582024	SEL1L3	23231	B4DTH5 D6RCE1 D6RDH1 D6RF11 H0Y8P8 H0Y9M6 H0YA36 Q68CR1	22510401	NM_015187
Sox7_2.0x_Union.txt	12017	AW169241	DDIT4	54541	Q9NX09	22510458	NM_019058
Sox7_2.0x_Union.txt	12017	BG026531	MTHFD2	10797	B2R7W0 B4DY35 B8ZZU9 B9A062 P13995 Q7Z650	22510488	NM_001040409
Sox7_2.0x_Union.txt	12017	BG026531	MTHFD2	10797	B2R7W0 B4DY35 B8ZZU9 B9A062 P13995 Q7Z650	22510489	NM_001040409
Sox7_2.0x_Union.txt	12017	AI636845	MARS	4141	A6NC17 A8K492 B3KVK7 B4DF61 B4E0E9 F5H2V6 F8VPL7 F8VS26 F8VZZ9 F8W0M7 F8W0S4 H0YHL6 H0YHV5 H0YI27 H0YI94 H0YIC2 H0YIP0 P56192 Q8NAB3	22510510	NM_004990
Sox7_2.0x_Union.txt	12017	AI446767	CXCL2	2920	P19875	22510613	NM_002089
Sox7_2.0x_Union.txt	12017	AI446767	CXCL2	2920	P19875	22510614	NM_002089
Sox7_2.0x_Union.txt	12017	AW005054	CAMK1D	57118	Q5SQQ7 Q8IU85	22510624	NM_020397
Sox7_2.0x_Union.txt	12017	BC152448	LPIN2	9663	Q92539	22510636	NM_014646
Sox7_2.0x_Union.txt	12017	CR592313	C19orf66	55337	Q9NUL5	22510664	NM_018381
Sox7_2.0x_Union.txt	12017	AI479863	SIPA1L2	57568	A7E2F9 Q9P2F8	22510670	NM_020808
Sox7_2.0x_Union.txt	12017	CA772125	SIPA1L2	57568	A7E2F9 Q9P2F8	22510671	NM_020808
Sox7_2.0x_Union.txt	12017	BE874862	G0S2	50486	P27469	22510705	NM_015714
Sox7_2.0x_Union.txt	12017	AW150758	DDX60	55601	D6R944 F5H781 H0Y8Z7 H0Y9B2 Q53FU7 Q6B0F7 Q6MZF7 Q8IY21 Q9H616 Q9NT91 Q9NXV7	22510722	NM_017631
Sox7_2.0x_Union.txt	12017	AA904865	CCDC85A	114800	A2VDJ7 B5MBW8 Q96PX6	22510804	NM_001080433
Sox7_2.0x_Union.txt	12017	CA941893	TACC1	6867	B4DH49 B4DHF7 B4E0Z9 B4E302 B4E3H6 B4E3L7 B7Z3G3 E7ET87 E7EVI4 G8JLK4 H0YAY0 H0YBT8 O75410 Q5HYH0 Q8IUJ5	22510843	NM_001122824
Sox7_2.0x_Union.txt	12017	CA941893	TACC1	6867	B4DH49 B4DHF7 B4E0Z9 B4E302 B4E3H6 B4E3L7 B7Z3G3 E7ET87 E7EVI4 G8JLK4 H0YAY0 H0YBT8 O75410 Q5HYH0 Q8IUJ5	22510844	NM_001122824
Sox7_2.0x_Union.txt	12017	BC036773	OPN3	23596	Q6GMT1 Q6P5W7 Q9H1Y3	22510967	NM_001030011
Sox7_2.0x_Union.txt	12017	AK301134	HLA-DRA	3122	B0UXD8 B4DLJ8 B4DVL4 B4DW37 B4E2U4 E7EM90 F5GZ59 F8W032 F8W0P2 O19720 P01903 Q29868 Q30118 Q5SP06	22510970	NM_019111
Sox7_2.0x_Union.txt	12017	EF208215	KLF5	688	A2TJX0 B4DL96 B4E2I1 Q13887 Q5T6X2	22511058	NM_001730
Sox7_2.0x_Union.txt	12017	AF395488	CTHRC1	115908	B4DTM1 E5RK99 E7EVQ5 F8WAA6 G3V141 Q96CG8	22511204	NM_001256099
Sox7_2.0x_Union.txt	12017	CR541907	NNMT	4837	F5H0R4 P40261 Q6FH49	22511262	NM_006169
Sox7_2.0x_Union.txt	12017	AB053311	RAPH1	65059	C9J0R8 C9J164 C9JLG4 C9K0J5 Q70E73 Q8N8R9	22511302	NM_025252
Sox7_2.0x_Union.txt	12017	AF327443	CAST	831	A8K8C4 B2RCJ7 B2RDU1 B7Z468 B7Z4U9 B7Z574 B7Z5T6 B7Z5T9 B7Z6N0 B7Z7L4 B7Z8S8 B7Z8U1 D6RAA8 D6RBR1 D6RBZ8 D6RC54 D6RGF7 E7EN75 E7EQ12 E7EQA0 E7EQK6 E7ES10 E7ESM9 E7EVY3 E9PCH5 E9PDE4 E9PSG1 F8W7E0 G5E946 G5E9D3 H0Y7F0 H0Y944 H0Y9H6 H0YA91 H0YD33 P20810 Q15786 Q59HE3 Q6AZE3 Q86YM9 Q9Y2M4	22511402	NM_001042440
Sox7_2.0x_Union.txt	12017	BC049836	SDC2	6383	B4DQ56 B4DT61 B7Z5H2 E5RHU3 E7ESK6 E9PBI9 F5H0S6 P34741 Q6PIS6	22511492	NM_002998
Sox7_2.0x_Union.txt	12017	BC049836	SDC2	6383	B4DQ56 B4DT61 B7Z5H2 E5RHU3 E7ESK6 E9PBI9 F5H0S6 P34741 Q6PIS6	22511493	NM_002998
Sox7_2.0x_Union.txt	12017	BC065536	DST /// LOC100652766	100652766	B4DGY0 B4DSS9 E7ERU0 E7ERU2 E7ERX3 E7ESK0 E7ETB9 E9PEB9 E9PHM6 F5H5R6 F6QMI7 F8W9J4 H0YAT7 H0YBX0 H0YC65 H0YC82 Q03001 Q5T0V7 Q6P0N6 Q86T18 Q9BSP9	22511605	NM_001144769
Sox7_2.0x_Union.txt	12017	AB028976	SAMD4A	23034	G3V2R1 Q8WW19 Q9UPU9	22511695	NM_001161576
Sox7_2.0x_Union.txt	12017	BC113603	PIK3CA	5290	A8KA75 B4DLX6 B4DYU4 C9J951 C9JAM9 E2I6G1 P42336 Q06DD2 Q0PN16 Q4LE51	22511700	NM_006218
Sox7_2.0x_Union.txt	12017	AF104266	LPHN2	23266	B1ALU1 B1ALU3 B3KVU1 H0Y3V3 H0Y5C0 O95490	22511759	NM_012302
Sox7_2.0x_Union.txt	12017	BX647203	DNAJC6	9829	B7Z3V8 D3DQ66 O75061	22511786	NM_001256864
Sox7_2.0x_Union.txt	12017	BC109280	DNAJC6	9829	B7Z3V8 D3DQ66 O75061	22511787	NM_001256864
Sox7_2.0x_Union.txt	12017	BC092440	SVIL	6840	B4DXQ4 B4E3H1 B4E3N7 F5GXV0 F5GY75 F5H2Q5 O95425 Q569J5 Q63HL8 Q659E9	22511917	NM_003174
Sox7_2.0x_Union.txt	12017	BC007580	AJUBA	84962	A8MX18 G3V481 G3V5F5 H0YJL9 Q96IF1	22512029	NM_032876
Sox7_2.0x_Union.txt	12017	BC142661	INADL	10207	A5PKX9 B4DE90 B4DFP2 B4E2N5 E7EMF0 F5GY89 F8W8B3 F8W8T2 Q8NI35	22512110	NM_005799
Sox7_2.0x_Union.txt	12017	BC143445	KIF6	221458	B7ZKX5 E2QRG3 E7EUN7 E9PG57 F5H416 F6S0W8 F6VGH2 H0Y718 Q17RI8 Q2MDE8 Q4KMP8 Q5JRK0 Q6ZMV9	22512164	NM_145027
Sox7_2.0x_Union.txt	12017	AK299059	DCLK1	9201	B7Z2T7 B7Z5K4 B7Z655 O15075 Q5VZY9	22512243	NM_001195415
Sox7_2.0x_Union.txt	12017	AK300038	TCF4	6925	B3KT62 B3KUC0 B3KVA4 B4DUG3 B7Z5M6 B7Z6Y1 E9PH57 G0LNT1 G0LNT2 G0LNT4 G0LNT6 G0LNT7 G0LNT8 G0LNT9 G0LNU0 G0LNU1 G0LNU2 G0LNU4 G0LNU5 G0LNU8 G0LNU9 G0LNV0 G0LNV1 G0LNV2 H3BMC8 H3BME8 H3BML7 H3BNI2 H3BNZ2 H3BP59 H3BPG3 H3BPJ7 H3BPQ1 H3BRF7 H3BSX3 H3BT24 H3BT95 H3BTC3 H3BTM9 H3BTP3 H3BTZ0 H3BUQ3 H3BVH6 P15884 Q59ES0	22512251	NM_001083962
Sox7_2.0x_Union.txt	12017	CX758352	TMEM135	65084	A8K6Y9 B4DKZ1 B4DYK0 Q7Z760 Q86UB9 Q8N605	22512275	NM_001168724
Sox7_2.0x_Union.txt	12017	AK300458	FN1	2335	A6YID2 A6YID3 A6YID4 A6YID5 A6YID6 A6YID7 B4DN21 B4DTH2 B4DTK1 B4DU16 B7ZLE5 B7ZLF0 E7ERA1 E9PE77 E9PG29 F8W7G7 H0Y4K8 H0Y7Z1 O95608 O95617 P02751 Q14328 Q564H7 Q59G22 Q5CZ99 Q68CX6 Q6MZF4 Q6MZM7 Q6N084 Q6PJE5 Q6STG2 Q7L553 Q7Z391 Q9H382 Q9UQS6	22512323	NM_002026
Sox7_2.0x_Union.txt	12017	AK295071	TACC1	6867	B4DH49 B4DHF7 B4E0Z9 B4E302 B4E3H6 B4E3L7 B7Z3G3 E7ET87 E7EVI4 H0YBT8 O75410 Q5HYH0 Q8IUJ5	22512333	NM_001122824
Sox7_2.0x_Union.txt	12017	M61199	SSFA2	6744	B3KXT1 B4DP45 B4DQT6 B4E2E5 E7END2 E7EUL7 E9PHV5 F2Z295 H7BZ26 H7BZN0 P28290	22512351	NM_001130445
Sox7_2.0x_Union.txt	12017	AK300035	MTHFD2	10797	B2R7W0 B4DY35 B8ZZU9 B9A062 F8WF06 F8WF89 P13995 Q7Z650	22512356	NM_001040409
Sox7_2.0x_Union.txt	12017	BC015062	MTHFD2	10797	B2R7W0 B4DY35 B8ZZU9 B9A062 P13995 Q7Z650	22512378	NM_001040409
Sox7_2.0x_Union.txt	12017	BC015062	MTHFD2	10797	B2R7W0 B4DY35 B8ZZU9 B9A062 P13995 Q7Z650	22512379	NM_001040409
Sox7_2.0x_Union.txt	12017	BC042008	ZEB1-AS1	220930	B4DJM3	22512410	NR_024284
Sox7_2.0x_Union.txt	12017	AK315944	GUCY1B3	2983	B2RCP1 B7Z426 B7Z685 B7Z6G8 B7Z9H9 D6RC99 E9PCN2 Q02153	22512473	NM_000857
Sox7_2.0x_Union.txt	12017	BC047391	RALGPS2	55103	B7Z7B1 F5H4A6 H0Y338 H7C2H2 Q86X27 Q8N7G9 Q8N8W3	22512518	NM_018037
Sox7_2.0x_Union.txt	12017	BC032139	HP1BP3	50809	B0QZK4 B0QZK5 B0QZK6 B0QZK7 B0QZK8 B0QZK9 B4E0N8 Q5SSJ5 Q5SWC8	22512537	NM_016287
Sox7_2.0x_Union.txt	12017	DB350079	IFI44	10561	B4DYN8 B7ZAG3 B7ZB11 H7C1F3 Q8TCB0	22512574	NM_006417
Sox7_2.0x_Union.txt	12017	AK300622	MPP4	58538	A2RU80 B4DQ17 B4DQT4 B4DUF3 B7ZM19 C9K002 E7ET46 E7EUL8 E9PG92 F6Q0Y6 F8WBH8 F8WC25 F8WDZ0 Q96JB8	22512580	NM_033066
Sox7_2.0x_Union.txt	12017	AW070460	CD55	1604	B1AP13 B1AP15 B2R658 B4DPY4 B4DUF2 E9PSH2 F5H2H0 H3BLV0 H7BY55 P08174 Q14UF2 Q14UF3 Q14UF4 Q14UF5 Q14UF6 Q8TD11 Q8TD12 Q8TD13 Q8TD14	22512666	NM_000574
Sox7_2.0x_Union.txt	12017	BC063625	KRTAP2-4 /// LOC730755	730755	P0C7H8 Q9BYR9	22512769	NM_001165252
Sox7_2.0x_Union.txt	12017	AK299098	AARS	16	B4DR45 H3BPK7 P49588	22512802	NM_001605
Sox7_2.0x_Union.txt	12017	BC114570	NRCAM	4897	B3KRX0 B4DFP9 B7Z670 C9J8B6 C9JF43 C9JH43 C9JUR7 C9JYY6 E9PDA4 E9PF33 F5GYD3 F8W774 F8W775 H7C132 Q14BM2 Q14CA1 Q4KMQ7 Q6QRP2 Q92823	22512880	NM_001037132
Sox7_2.0x_Union.txt	12017	BC114570	NRCAM	4897	B3KRX0 B4DFP9 B7Z670 C9J8B6 C9JF43 C9JH43 C9JUR7 C9JYY6 E9PDA4 E9PF33 F5GYD3 F8W774 F8W775 H7C132 Q14BM2 Q14CA1 Q4KMQ7 Q6QRP2 Q92823	22512881	NM_001037132
Sox7_2.0x_Union.txt	12017	BC072452	FAM107B	83641	C9J3Q3 C9J6N5 C9J6Y8 C9JP05 C9JQ40 C9JW51 C9JYP1 F8WCJ2 F8WDH7 Q9H098	22512900	NM_031453
Sox7_2.0x_Union.txt	12017	CR624632	IL6	3569	B4DNQ5 B4DNV3 B4DVM1 B5MC21 B5MCZ3 P05231 Q75MH2	22512949	NM_000600
Sox7_2.0x_Union.txt	12017	AK295491	SPP1	6696	A6XMV6 B7Z351 C4B6Q2 C9JXD2 D6R9C5 F2YBS4 F2YBS5 F2YQ21 P10451 Q3LGB0	22512992	NM_000582
Sox7_2.0x_Union.txt	12017	BC021803	FRYL	285527	B3KXG5 B3KY15 D6R9B9 D6RJI4 F2Z2S2 F5GX82 H0Y9X0 O94915 Q6AI58 Q6ZNE6 Q6ZR29	22513056	NM_001039751
Sox7_2.0x_Union.txt	12017	AK093948	MCOLN3	55283	A8K841 B1ANB7 Q6P9H1 Q8TDD5	22513086	NM_001253693
Sox7_2.0x_Union.txt	12017	AY154471	RASSF2	9770	P50749 Q8IZA5	22513125	NM_014737
Sox7_2.0x_Union.txt	12017	BC110385	RASSF2	9770	P50749 Q8IZA5	22513126	NM_014737
Sox7_2.0x_Union.txt	12017	AK294266	FKBP9 /// FKBP9L	11328	A7YQ73 A8K073 B3KQQ0 B7Z1G9 B7Z1U8 B7Z230 B7Z6H3 B7Z994 B7ZAH5 C9J4P8 O95302 Q75LS8	22513268	NM_007270
Sox7_2.0x_Union.txt	12017	AK298939	SDC2	6383	B4DQ56 B4DT61 B7Z5H2 E5RHU3 E7ESK6 E9PBI9 F5H0S6 P34741 Q6PIS6	22513283	NM_002998
Sox7_2.0x_Union.txt	12017	AK298939	SDC2	6383	B4DQ56 B4DT61 B7Z5H2 E5RHU3 E7ESK6 E9PBI9 F5H0S6 P34741 Q6PIS6	22513284	NM_002998
Sox7_2.0x_Union.txt	12017	AK298048	SERPINE1	5054	B7Z1D9 B7Z4S0 B7Z4X6 B7ZAB0 C9J272 F8WD53 P05121	22513342	NM_000602
Sox7_2.0x_Union.txt	12017	U76996	KCNK1	3775	B2RA30 O00180 Q5T5E7	22513582	NM_002245
Sox7_2.0x_Union.txt	12017	AK302591	CEP85L	387119	A2A3P3 B4DYT2 Q3ZCQ5 Q5SZL2	22513649	NM_001042475
Sox7_2.0x_Union.txt	12017	AY358250	SHC4	399694	B3KWE9 B3KWT2 B7Z7K3 F5H5M1 H0YLU6 H0YLZ2 Q6S5L8	22513717	NM_203349
Sox7_2.0x_Union.txt	12017	AK301450	GRK5	2869	B2R7K0 B4DPB3 B4DWB2 G8JLE8 P34947 Q24JT8 Q5T060 Q71RG8	22513736	NM_005308
Sox7_2.0x_Union.txt	12017	AK294289	NOV	4856	B4DFW1 P48745	22513745	NM_002514
Sox7_2.0x_Union.txt	12017	AK302651	PDP1	54704	B3KPZ7 B4DYX8 E5RFL8 E5RHB9 E5RI96 E5RIE5 E5RIV4 Q6P1N1 Q9P0J1	22513800	NM_001161778
Sox7_2.0x_Union.txt	12017	BT006840	PSAT1	29968	B4DHQ3 B4DHX7 Q9Y617	22513834	NM_021154
Sox7_2.0x_Union.txt	12017	BT006840	PSAT1	29968	B4DHQ3 B4DHX7 Q9Y617	22513835	NM_021154
Sox7_2.0x_Union.txt	12017	AK296085	TNFSF10	8743	H7C246 P50591 Q6IBA9 Q6JSD9	22514438	NM_001190942
Sox7_2.0x_Union.txt	12017	AK292998	CALCRL	10203	B8ZZJ4 E7EN01 Q16602 Q2PZS6	22514479	NM_005795
Sox7_2.0x_Union.txt	12017	AK302527	IFI44	10561	B4DYN8 B7ZAG3 B7ZB11 Q8TCB0	22514489	NM_006417
Sox7_2.0x_Union.txt	12017	AK292645	SETD8	387893	C9JKQ0 E3VVS3 F8WC45 Q9NQR1	22514529	NM_020382
Sox7_2.0x_Union.txt	12017	AK296118	SERINC2	347735	E7EUZ9 Q96AI1 Q96IM8 Q96SA4	22514539	NM_001199037
Sox7_2.0x_Union.txt	12017	AK296788	EPHA2	1969	B4DL04 B5A968 P29317 Q96HF4	22514652	NM_004431
Sox7_2.0x_Union.txt	12017	AK300391	SERPINB8	5271	B2R9H3 B4DTW2 C9JTJ8 C9JVA8 H7BXK7 P50452	22514666	NM_001031848
Sox7_2.0x_Union.txt	12017	AK298380	LIPH	200879	A2IBA6 B4DPK4 F8WE09 H7BZL3 H7C2X1 Q8WWY8	22514709	NM_139248
Sox7_2.0x_Union.txt	12017	AK300814	MSL3	10943	A6NCU2 A6NHW8 A6NLU8 A8K165 B4E2T7 B7Z227 C9JKR8 C9JXM9 F8WC61 H7BYE4 H7C522 Q8N5Y2	22514740	NM_001193270
Sox7_2.0x_Union.txt	12017	AF287261	SETD8	387893	C9JKQ0 E3VVS3 F8WC45 Q9NQR1	22514756	NM_020382
Sox7_2.0x_Union.txt	12017	AK304641	SERPINB1	1992	B4DNT0 B4E3A8 P30740	22514766	NM_030666
Sox7_2.0x_Union.txt	12017	AK302156	SHC4	399694	B3KWE9 B3KWT2 B7Z7K3 F5H5M1 H0YLU6 H0YLZ2 Q6S5L8	22514785	NM_203349
Sox7_2.0x_Union.txt	12017	AK289438	FKBP9 /// FKBP9L	11328	A7YQ73 A8K073 B3KQQ0 B7Z1G9 B7Z1U8 B7Z230 B7Z6H3 B7Z994 B7ZAH5 C9J4P8 O95302 Q59FV7 Q75LS8	22514832	NM_007270
Sox7_2.0x_Union.txt	12017	AK293317	LAYN	143903	B4DDS5 B4DJU0 B4DP26 E9PMI0 E9PQU7 E9PR90 Q6UX15	22514978	NM_001258390
Sox7_2.0x_Union.txt	12017	AK304670	TXNIP	10628	B4DVM7 B4DVR8 B4E3D3 F6RIS4 Q9H3M7	22515029	NM_006472
Sox7_2.0x_Union.txt	12017	AK304670	TXNIP	10628	B4DVM7 B4DVR8 B4E3D3 F6RIS4 Q9H3M7	22515030	NM_006472
Sox7_2.0x_Union.txt	12017	BX417576	PTPRR	5801	B7Z3J1 B7Z956 B7Z998 F5GXR7 F8VU63 F8VVE9 Q05B41 Q0VD90 Q15256 Q2TAJ3 Q569H9 Q68CP6 Q7Z2V8	22515133	NM_001207015
Sox7_2.0x_Union.txt	12017	AK302128	TOMM34	10953	B4DXU3 Q15785 Q6ZPD0	22515186	NM_006809
Sox7_2.0x_Union.txt	12017	AK296900	KLF5	688	A2TJX0 B4DL96 B4E2I1 Q13887 Q5T6X2	22515247	NM_001730
Sox7_2.0x_Union.txt	12017	AK296900	KLF5	688	A2TJX0 B4DL96 B4E2I1 Q13887 Q5T6X2	22515248	NM_001730
Sox7_2.0x_Union.txt	12017	AK302189	ASNS	440	B4DXZ1 B4DY32 B7ZAA9 C9J057 C9J605 C9JLA3 C9JLN6 C9JM09 C9JT45 E9PCI3 E9PCX6 F8WEJ5 P08243	22515279	NM_001178075
Sox7_2.0x_Union.txt	12017	AK295742	SORBS2	8470	B3KPQ7 B3KPU4 B7Z1G5 B7Z3D7 B7Z997 C9IZ89 C9IZT7 C9J348 C9J372 C9J3W4 C9J4K2 C9J4Z9 C9J620 C9J7Q5 C9J8E3 C9J9D3 C9JBB0 C9JBR8 C9JC90 C9JDX2 C9JEA9 C9JFS9 C9JG84 C9JI79 C9JKV9 C9JL62 C9JLD6 C9JM25 C9JN77 C9JWC3 C9JZ60 E9PAS5 E9PAW4 G3XAI0 H7BXR3 H7BXR4 H7BZK1 H7BZX1 H7C1R7 O94875	22515307	NM_001145670
Sox7_2.0x_Union.txt	12017	AK300273	CTHRC1	115908	B4DTM1 E5RK99 E7EVQ5 F8WAA6 G3V141 Q96CG8	22515391	NM_001256099
Sox7_2.0x_Union.txt	12017	AK293357	RARRES3	5920	A6NG31 Q9UL19	22515393	NM_004585
Sox7_2.0x_Union.txt	12017	BC044919	PNRC1	10957	Q12796 Q49A59 Q7Z5N0 Q9BXV2	22515525	NM_006813
Sox7_2.0x_Union.txt	12017	AK297190	CCNG1	900	B4DLW7 D6RCC5 D6RD30 D6RGX3 E7ERZ1 P51959 Q7Z396	22515792	NM_004060
Sox7_2.0x_Union.txt	12017	AK297190	CCNG1	900	B4DLW7 D6RCC5 D6RD30 D6RGX3 E7ERZ1 P51959 Q7Z396	22515793	NM_004060
Sox7_2.0x_Union.txt	12017	AK300246	FN1	2335	A6YID2 A6YID3 A6YID4 A6YID5 A6YID6 A6YID7 B4DN21 B4DTH2 B4DTK1 B4DU16 B7ZLE5 B7ZLF0 E7ERA1 E9PE77 E9PG29 F8W7G7 H0Y4K8 H0Y7Z1 O95608 O95617 P02751 Q14328 Q564H7 Q59G22 Q5CZ99 Q68CX6 Q6MZF4 Q6MZM7 Q6N084 Q6PJE5 Q6STG2 Q7L553 Q7Z391 Q9H382 Q9UQS6	22515946	NM_002026
Sox7_2.0x_Union.txt	12017	AK297724	HAS2	3037	B4DN16 E7ETI9 Q92819	22516039	NM_005328
Sox7_2.0x_Union.txt	12017	AK297579	TP53I3	9540	B4DMQ7 H7BZH6 Q53FA7	22516275	NM_001206802
Sox7_2.0x_Union.txt	12017	AK297937	PLAT	5327	B4DN26 B4DNJ1 B4DRD3 B4DV92 B8ZX62 E5RGA1 E5RHG4 E7ESF4 H0YBH9 P00750 Q5HYM8 Q8NG20	22516295	NM_000930
Sox7_2.0x_Union.txt	12017	AF087862	RHOJ	57381	G3V476 G3V4H1 Q59G91 Q7Z513 Q9H4E5	22516350	NM_020663
Sox7_2.0x_Union.txt	12017	AK303900	CAST	831	A8K8C4 B2RCJ7 B2RDU1 B7Z468 B7Z4U9 B7Z574 B7Z5T6 B7Z5T9 B7Z6N0 B7Z7L4 B7Z8S8 B7Z8U1 D6RAA8 D6RBR1 D6RBZ8 D6RC54 D6RGF7 E7EN75 E7EQ12 E7EQA0 E7EQK6 E7ES10 E7ESM9 E7EVY3 E9PCH5 E9PDE4 E9PSG1 F8W7E0 G5E946 G5E9D3 H0Y7F0 H0Y944 H0Y9H6 H0YA91 H0YD33 P20810 Q59HE3 Q6AZE3 Q86YM9 Q9Y2M4	22516536	NM_001042440
Sox7_2.0x_Union.txt	12017	AK303900	CAST	831	A8K8C4 B2RCJ7 B2RDU1 B7Z468 B7Z4U9 B7Z574 B7Z5T6 B7Z5T9 B7Z6N0 B7Z7L4 B7Z8S8 B7Z8U1 D6RAA8 D6RBR1 D6RBZ8 D6RC54 D6RGF7 E7EN75 E7EQ12 E7EQA0 E7EQK6 E7ES10 E7ESM9 E7EVY3 E9PCH5 E9PDE4 E9PSG1 F8W7E0 G5E946 G5E9D3 H0Y7F0 H0Y944 H0Y9H6 H0YA91 H0YD33 P20810 Q59HE3 Q6AZE3 Q86YM9 Q9Y2M4	22516537	NM_001042440
Sox7_2.0x_Union.txt	12017	AK302694	LOC645954 /// SVIL	645954	B4DXQ4 B4DZ11 B4E3H1 B4E3N7 F5GXV0 F5GY75 F5H2Q5 O95425 Q569J5 Q63HL8 Q659E9	22516661	NM_003174
Sox7_2.0x_Union.txt	12017	AK296921	ARID5B	84159	Q14865	22516708	NM_001244638
Sox7_2.0x_Union.txt	12017	AK297734	STC1	6781	B2R6I6 B4DN22 P52823	22516765	NM_003155
Sox7_2.0x_Union.txt	12017	AK295398	HSPA1A /// HSPA1B	3303	A8K5I0 B3KTT5 B4DFN9 B4DI39 B4DNT8 B4DNV4 B4DVU9 B4DWK5 B4E1S9 B4E1T6 B4E388 B4E3B6 E7EP11 E7EP94 F5GZ62 F5H1D3 F8VZJ4 H0YG33 P08107 Q59EJ3 Q5SP16	22516897	NM_005345
Sox7_2.0x_Union.txt	12017	AK304276	KDM3A	55818	B4E2H5 C9J7Q7 C9JC73 F5H070 F5H4E6 F8WE62 Q9P0K0 Q9Y4C1	22517062	NM_001146688
Sox7_2.0x_Union.txt	12017	AK300389	OSBPL6	114880	Q86V84 Q9BZF3	22517085	NM_001201480
Sox7_2.0x_Union.txt	12017	AY137774	FRMD3	257019	A2A2Y4 E9PCE0 Q5JV61	22517232	NM_001244959
Sox7_2.0x_Union.txt	12017	AK300328	FKBP9 /// FKBP9L	11328	A7YQ73 A8K073 B3KQQ0 B7Z1G9 B7Z1U8 B7Z230 B7Z6H3 B7Z994 B7ZAH5 C9J4P8 O95302 Q59FV7 Q75LS8	22517249	NM_007270
Sox7_2.0x_Union.txt	12017	AK294611	LNX1	84708	B4DGI5 D6RAH9 D6RB76 D6RE08 F5GZH4 Q8TBB1	22517286	NM_001126328
Sox7_2.0x_Union.txt	12017	AK304404	TGFBR2	7048	A3QNQ0 B4E2S6 D2JYI1 E9PDS4 F8WCK9 P37173 Q6A176	22517326	NM_001024847
Sox7_2.0x_Union.txt	12017	AK300067	SDC2	6383	B4DQ56 B4DT61 B7Z5H2 E5RHU3 E7ESK6 E9PBI9 F5H0S6 P34741 Q6PIS6	22517608	NM_002998
Sox7_2.0x_Union.txt	12017	M64445	CSF2RA	1438	B4DW68 F2Z3C9 P15509	22517711	NM_001161529
Sox7_2.0x_Union.txt	12017	AK295310	PSAT1	29968	B4DHQ3 B4DHX7 Q9Y617	22517716	NM_021154
Sox7_2.0x_Union.txt	12017	AK300068	RBM24	221662	A8KAI7 B7Z6B4 B7Z6B7 E9PAY4 H0YA61 Q9BX46	22517794	NM_001143941
Sox7_2.0x_Union.txt	12017	AK294839	NDFIP2	54602	B4DGY6 B4DLX2 H0Y8A7 H7C5F7 Q9NV92	22517834	NM_001161407
Sox7_2.0x_Union.txt	12017	AK300535	TSC22D3	1831	B2R4H9 B3KXT7 B4DU81 Q5JRJ0 Q5JRJ2 Q99576	22517901	NM_001015881
Sox7_2.0x_Union.txt	12017	AK301220	IL7R	3575	B8YG18 D6RCR9 D6RDM4 D6RG28 D6RGV2 D9N160 H0Y8G3 H0YA41 P16871	22518133	NM_002185
Sox7_2.0x_Union.txt	12017	AK300181	PLSCR1	5359	B4DTE8 C9J0H3 C9J7K9 C9J9P4 C9JE06 C9JSI9 F2Z3F2 H7C5I5 O15162 Q8WVK1	22518137	NM_021105
Sox7_2.0x_Union.txt	12017	AK300181	PLSCR1	5359	B4DTE8 C9J0H3 C9J7K9 C9J9P4 C9JE06 C9JSI9 F2Z3F2 H7C5I5 O15162 Q8WVK1	22518138	NM_021105
Sox7_2.0x_Union.txt	12017	AK298626	GULP1	51454	B3KN52 B4DQ40 B8ZZ72 B8ZZL1 E9PB86 H0Y6R1 H7BZV7 Q59EC1 Q9UBP9	22518164	NM_001252668
Sox7_2.0x_Union.txt	12017	AY052783	PRSS3	5646	A8CED3 F8W7P3 P35030 Q6ISJ4 Q7Z5F4 Q8N2U3	22518231	NM_001197097
Sox7_2.0x_Union.txt	12017	AK298973	IL11	3589	A8K3F7 B4DQV5 P20809	22518283	NM_000641
Sox7_2.0x_Union.txt	12017	U87460	GPR37	2861	A4D0Y6 O15354	22518448	NM_005302
Sox7_2.0x_Union.txt	12017	AF244577	SLC17A5	26503	B2RE38 B4DFF2 Q9NRA2	22518605	NM_012434
